# Supplementary material
Source: ML conference proceedings conference paper supplement (https://openreview.net/forum?id=2SJsV41CxV)
Supplement: supplementary_material [file HA Data.xlsx]

## Sheet: Yield
Longitude	Latitude	Tem	Pre	rate	SOC	Clay	pH	BD	irrigation	Yield
121.133	31.2	16.7	1000	300	13.5209	0.245	7.02	1.37	334.889	6266.36
121.133	31.2	16.7	1000	300	13.5209	0.245	7.02	1.37	334.889	8155.56
121.133	31.2	16.7	1000	0	13.5209	0.245	7.02	1.37	334.889	3898.66
121.133	31.2	16.7	1000	0	13.5209	0.245	7.02	1.37	334.889	4088.89
103.772	25.0445	13	1151	240	20.2436	0.21	6.17	1.32652	41.2443	10160
103.772	25.0445	13	1151	0	20.2436	0.21	6.17	1.32652	41.2443	8180
99.181	25.071	13	980	240	19.0835	0.21	6.05	1.41	41.2443	11160
99.181	25.071	13	980	0	19.0835	0.21	6.05	1.41	41.2443	7430
100.124	25.8282	14	1081	105	9.8	0.355	6.6	1.31	62	9490.5
100.124	25.8282	14	1081	0	9.8	0.355	6.6	1.31	62	5406
100.117	25.8333	15.1	1048	0	33.2367	0.23	7.1	1.31	20.512	3900
100.174	25.8928	14.6	1048	156	33.24	0.32	7.1	1.31	62	10000
100.174	25.8928	14.6	1048	195	33.2367	0.32	7.1	1.31	62	11050
100.174	25.8928	14.6	1048	0	33.2367	0.32	7.1	1.31	62	5910
99.9596	25.9808	13.9	745	75	25.4756	0.23	5.7	1.30682	49	2042.02
99.9596	25.9808	13.9	745	75	25.4756	0.23	5.7	1.30682	49	2425.21
100.08	26.0041	14	753	225	51.0557	0.23	7.64	1.36219	13.8771	9500
100.08	26.0041	14	753	0	51.0557	0.23	7.64	1.36219	13.8771	7700
100.748	26.6858	13	896	0	16.7633	0.21	6.54	1.36657	14.992	7310
100.661	26.7461	17	907	240	22.4478	0.21	6.68	1.41	17.6749	12420
100.661	26.7461	17	907	0	22.4478	0.21	6.68	1.41	17.6749	9470
120.5	42.1333	5	428	210	7.07657	0.175	7.4	1.5	151	8023.89
120.5	42.1333	5	428	210	7.07657	0.175	7.4	1.5	151	8527.07
116.167	40.0333	12.3	566	225	6.61032	0.15	7.9	1.4	158	5193
116.167	40.0333	12.3	566	0	6.61032	0.15	7.9	1.4	158	5349
124.3	43.2333	6	646	169	14.79	0.23	6.6	1.3	61	9400
124.3	43.2333	6	646	179	14.79	0.23	6.6	1.3	61	9300
124.3	43.2333	6	646	185	14.7912	0.23	6.6	1.3	61	9200
104	29.6	16	1200	0	13.9211	0.21	6.1	1.41346	61.3042	5100
105.067	30.175	16	1025	220	7.5	0.164	8.52	1.37	79	8480
105.067	30.175	16	1025	0	7.5	0.164	8.52	1.37	79	6020
103.734	30.9503	15.2	1200	180	16.4733	0.122	6.63	1.41	104.545	8335.3
103.734	30.9503	15.2	1200	0	16.4733	0.122	6.63	1.41	104.545	6466.13
104.401	31.0039	16.5	910	210	29.2923	0.249	6.9	1.4	105.491	9275.4
104.401	31.0039	16.5	910	210	29.2923	0.249	6.9	1.4	105.491	12405.8
104.401	31.0039	16.5	910	210	29.2923	0.249	6.9	1.4	105.491	12579.7
104.167	31.05	16.5	807	240	20.11	0.221	5.99	1.1	158.29	9040
104.417	31.1424	16	889	135	24.768	0.04	7.19	1.37316	93.3652	10990
104.417	31.1424	16	889	135	24.768	0.04	7.19	1.37316	93.3652	11380
104.417	31.1424	16	889	135	24.768	0.04	7.19	1.37316	93.3652	11510
104.417	31.1424	16	889	135	24.768	0.04	7.19	1.37316	93.3652	13340
104.417	31.1424	16	889	0	24.768	0.04	7.19	1.37316	93.3652	9010
104.417	31.1424	16	889	0	24.768	0.04	7.19	1.37316	93.3652	9350
104.417	31.1424	16	889	0	24.768	0.04	7.19	1.37316	93.3652	9490
104.417	31.1424	16	889	0	24.768	0.04	7.19	1.37316	93.3652	10200
104.383	31.1667	16	889	180	11.5429	0.37	6.46	1.24	100.32	9010.4
104.383	31.1667	16	889	0	11.5429	0.37	6.46	1.24	100.32	6427.2
105.467	31.2667	17.3	863	150	14.83	0.181	7.83	1.37	26.6953	7160
105.467	31.2667	17.3	863	150	14.83	0.181	7.83	1.37	26.6953	7172.41
105.467	31.2667	17.3	863	0	14.83	0.181	7.83	1.37	26.6953	5860
105.467	31.2667	17.3	863	0	14.83	0.181	7.83	1.37	26.6953	5862.07
105.638	37.5059	7	200	360	8.06265	0.21	8.06	1.41	98	10503
105.638	37.5059	7	200	0	8.06265	0.21	8.06	1.41	98	8452
106.21	37.99	8.9	192.9	345	8.17865	0.1546	8.3	1.5	101	6844.24
106.21	37.99	8.9	192.9	0	8.17865	0.1546	8.3	1.5	101	5297.25
106.231	38.0762	6	190	288	11.4849	0.23	7.68	1.41	71.8513	9567
106.28	38.12	8.9	192.9	0	8.81671	0.1546	8.3	1.47	101	3387
106.28	38.12	8.9	192.9	0	8.81671	0.1546	8.3	1.47	101	3923
106.295	38.1206	6	193	240	8.82251	0.1825	7.8	1.35	52.34	8498
106.295	38.1206	6	193	240	8.82251	0.1825	7.8	1.35	52.34	9631
106.295	38.1206	6	193	300	8.82251	0.1825	7.8	1.35	52.3427	8676
106.295	38.1206	6	193	300	8.81671	0.182	7.8	1.47	52.3427	7098
106.295	38.1206	6	193	0	8.81671	0.182	7.8	1.47	52.3427	3387
106.295	38.1206	6	193	0	8.81671	0.182	7.8	1.47	52.3427	3923
106.291	38.1222	8.9	192.9	240	8.82	0.35	8.21	1.47	52	9631
106.291	38.1222	8.9	192.9	300	8.81671	0.35	8.21	1.47	52.3427	9634
106.291	38.1222	8.9	192.9	0	8.81671	0.35	8.21	1.47	52.3427	3990
106.193	38.1239	6	192.9	300	9.33875	0.23	8.49	1.41	115	7260
106.267	38.1333	8.5	200	240	8.12	0.18	8.5	1.4	63	8953
106.267	38.1333	8.5	200	240	8.12	0.18	8.5	1.4	63	9898
106.267	38.1333	8.5	200	300	8.12065	0.18	8.5	1.4	62.6968	8608
106.267	38.1333	8.5	200	300	8.12065	0.18	8.5	1.4	62.6968	9644
106.267	38.1333	8.5	200	0	8.12065	0.18	8.5	1.4	62.6968	4879
106.267	38.1333	8.5	200	0	8.12065	0.18	8.5	1.4	62.6968	5175
106.267	38.1333	8.9	192.9	240	8.63	0.21	8.58	1.57	63	8898.2
106.267	38.1333	8.9	192.9	300	8.63	0.21	8.58	1.57	62.6968	8608.1
106.267	38.1333	8.9	192.9	0	8.63	0.21	8.58	1.57	62.6968	3485.2
106.295	38.1947	6	187	288	10.7889	0.23	8.17	1.41	54.6734	7597.5
106.371	38.8006	8.7	200	240	6.2297	0.184	7.8	1.36	102	7839.08
106.371	38.8006	8.7	200	0	6.2297	0.184	7.8	1.36	102	3241.38
116.794	30.3892	16.1	1556.9	125	31.5081	0.21	7.67	1.41	180.504	10630
116.794	30.3892	16.1	1556.9	0	31.5081	0.21	7.67	1.41	180.504	8700
117.55	30.8333	16	1513	240	15.42	0.06	5.55	1.40975	217.261	9044
117.55	30.8333	16	1513	240	15.42	0.06	5.55	1.40975	217.261	9073
117.55	30.8333	16	1513	0	15.42	0.06	5.55	1.40975	217.261	6313
117.55	30.8333	16	1513	0	15.42	0.06	5.55	1.40975	217.261	6722
117.046	30.9244	15.8	1326.9	209.9	8.90371	0.156	6.55	1.41	187.414	9760.07
117.046	30.9244	15.8	1326.9	209.9	8.90371	0.156	6.55	1.41	187.414	10061.1
119.44	31.0111	15	1405	225	3.7703	0.1312	6.5	1.40973	126.212	7027.03
119.44	31.0111	15	1405	0	3.7703	0.1312	6.5	1.40973	126.212	5081.08
117.288	31.257	15.8	1149.1	210	13.6543	0.323	5.73	1.41	248.847	4303
117.288	31.257	15.8	1149.1	210	13.6543	0.323	5.73	1.41	248.847	5423
117.793	31.6458	16	996	214	34.07	0.49	6.99	1.41	190.115	7167.03
117.793	31.6458	16	996	214	34.07	0.49	6.99	1.41	190.115	8178.19
117.793	31.6458	16	996	225	34.07	0.49	6.99	1.41	190.12	7500.38
117.793	31.6458	16	996	225	34.07	0.49	6.99	1.41	190.12	8800.44
117.793	31.6458	16	996	0	34.07	0.49	6.99	1.41	190.115	4089.09
117.793	31.6458	16	996	0	34.07	0.49	6.99	1.41	190.115	4277.99
117.912	31.6512	15	1114	180	12.471	0.21	6.3	1.40989	212.248	9190
117.912	31.6512	15	1114	0	12.471	0.21	6.3	1.40989	212.248	6550
117.912	31.6512	15	1114	0	12.471	0.21	6.3	1.40989	212.248	6650
117.694	31.6603	15.5	1100	125	14.0893	0.25	6.03	1.41	166.467	10692
117.694	31.6603	15.5	1100	0	14.0893	0.25	6.03	1.41	166.467	7829.47
117.68	31.6664	16.8	1050	192	17.28	0.21	6.93	1.41	165.887	7364.79
117.68	31.6664	16.8	1050	0	17.28	0.21	6.93	1.41	165.887	6439.86
117.25	31.7	15	1160	225	11.43	0.21	5.9	1.41	240	7203.72
117.25	31.7	15	1160	270	11.4269	0.21	5.9	1.41	240.043	7581.47
117.25	31.7	15	1160	0	11.4269	0.21	5.9	1.41	240.043	5287.54
117.07	32.9828	15.3	874.6	225	8.06265	0.21	6.46	1.39028	105.462	8809
117.07	32.9828	15.3	874.6	0	8.06265	0.21	6.46	1.39028	105.462	6648
118.2	34.55	14.1	840	187.5	9	0.18	6.46	1.39009	259.239	6880
118.2	34.55	14.1	840	0	9	0.18	6.46	1.39009	259.239	5220
118.281	35.1181	14.9	862.3	240	13.6	0.2252	6.48	1.39062	107.152	8276.7
118.281	35.1181	14.9	862.3	240	13.6	0.2252	6.48	1.39062	107.152	8563.3
118.281	35.1181	14.9	862.3	0	13.6	0.2252	6.48	1.39062	107.152	6210
118.281	35.1181	14.9	862.3	0	13.6	0.2252	6.48	1.39062	107.152	6438.3
114.083	23.0167	22	2200	105	10.7889	0.253	5.8	1.41	104.802	4078.2
114.083	23.0167	22	2200	105	10.7889	0.253	5.8	1.41	104.802	5049.2
112.683	23.0333	21	1681	30	18.9	0.387	4.6	1.34	145	6800
112.683	23.0333	21	1681	45	18.9	0.387	4.6	1.34	145	5900
112.683	23.0333	21	1681	100	18.9	0.387	4.6	1.34	145	5900
112.683	23.0333	21	1681	100	18.9	0.387	4.6	1.34	145	7600
112.683	23.0333	21	1681	200	18.9	0.387	4.6	1.34148	145.254	5400
112.683	23.0333	21	1681	0	18.9	0.387	4.6	1.34148	145.254	5800
112.683	23.0333	21	1681	0	18.9	0.387	4.6	1.34148	145.254	6400
113.333	23.1333	21	1703	150	23.96	0.21	6	1.36	82	7581.08
113.333	23.1333	21	1703	150	23.96	0.21	6	1.36	82	7662.16
113.333	23.1333	21	1703	180	23.9559	0.21	6	1.36	82.2157	6770.27
113.333	23.1333	21	1703	180	23.96	0.21	6	1.36	82	6770.27
113.333	23.1333	21	1703	180	23.96	0.21	6	1.36	82	6851.35
113.333	23.1333	21	1703	210	23.9559	0.21	6	1.36	82.2157	5837.84
113.333	23.1333	21	1703	0	23.9559	0.21	6	1.36	82.2157	4175.68
113.333	23.1333	21	1703	0	23.9559	0.21	6	1.36	82.2157	4986.49
113.35	23.15	21.9	1647.5	144	21.09	0.21	5.88	1.36	82	5300
113.35	23.15	21.9	1647.5	144	21.09	0.21	5.88	1.36	82	5877.8
113.35	23.15	21.9	1647.5	180	21.0905	0.21	5.88	1.35794	82.2772	4577.8
113.35	23.15	21.9	1647.5	180	21.0905	0.21	5.88	1.35794	82.2772	5666.7
113.35	23.15	21.9	1647.5	0	21.0905	0.21	5.88	1.35794	82.2772	3933.3
113.35	23.15	21.9	1647.5	0	21.0905	0.21	5.88	1.35794	82.2772	4988.9
113.417	23.4167	21	1871	180	12.01	0.21	6.09	1.41	134	8420
113.417	23.4167	21	1871	180	12.01	0.21	6.09	1.41	134	9730
113.417	23.4167	21	1871	180	12.01	0.21	6.09	1.41	134	9970
113.417	23.4167	21	1871	180	12.01	0.21	6.09	1.41	134	10100
113.417	23.4167	21	1871	200	12.007	0.21	6.09	1.41001	134.009	8540
113.417	23.4167	21	1871	0	12.007	0.21	6.09	1.41001	134.009	5720
113.417	23.4167	21	1871	0	12.007	0.21	6.09	1.41001	134.009	5880
112.058	24.0644	19	1783	191	19.6056	0.21	5.2	1.41439	44.427	7090
112.058	24.0644	19	1783	0	19.6056	0.21	5.2	1.41439	44.427	5230
108.29	22.8453	20	1296	157	11.1949	0.46	6.24	1.33	56.5158	6420
108.29	22.8453	20	1296	157	11.1949	0.46	6.24	1.33	56.5158	7450
108.29	22.8453	20	1296	157	11.1949	0.46	6.24	1.33	56.5158	7760
108.879	23.1592	20	1470	176	16.7633	0.21	5.1	1.41	66.4102	8460
108.879	23.1592	20	1470	0	16.7633	0.21	5.1	1.41	66.4102	5400
110.131	25.8297	15.1	1048	173	12	0.188	7	1.31	65	9740.74
110.131	25.8297	15.1	1048	0	12	0.188	7	1.31	65	8259.26
120.962	31.2542	15.5	1100	184.88	12.703	0.132	7.8	1.41	216.84	9650
120.962	31.2542	15.5	1100	184.88	12.703	0.132	7.8	1.41	216.84	9980
120.962	31.2542	15.5	1100	198	12.703	0.132	7.8	1.41	216.84	9070
120.962	31.2542	15.5	1100	198	12.703	0.132	7.8	1.41	216.84	9170
120.962	31.2542	15.5	1100	302.7	12.703	0.132	7.8	1.41	216.844	9260
120.962	31.2542	15.5	1100	302.7	12.703	0.132	7.8	1.41	216.844	9360
120.962	31.2542	15.5	1100	324.6	12.703	0.132	7.8	1.41	216.844	9890
120.962	31.2542	15.5	1100	324.6	12.703	0.132	7.8	1.41	216.844	10300
120.962	31.2542	15.5	1038	225	35	0.326	7.36	1.2	217	7800
120.962	31.2542	15.5	1038	225	35	0.326	7.36	1.2	217	8320
120.962	31.2542	15.5	1097.1	278.9	17.5754	0.21	7.4	1.41	216.844	8030
120.962	31.2542	15.5	1038	300	26.6	0.319	7.35	1.41	216.844	7680
120.962	31.2542	15.5	1038	300	26.6	0.319	7.35	1.41	216.844	8750
120.962	31.2542	15.5	1038	300	26.6	0.319	7.35	1.41	216.844	8990
120.962	31.2542	15.5	1038	0	26.6	0.319	7.35	1.41	216.844	4580
120.962	31.2542	15.5	1038	0	26.6	0.319	7.35	1.41	216.844	4880
120.962	31.2542	15.5	1038	0	35	0.326	7.36	1.2	216.844	4880
120.962	31.2542	15.5	1038	0	26.6	0.319	7.35	1.41	216.844	4910
120.962	31.2542	15.5	1038	0	35	0.326	7.36	1.2	216.844	4910
119.9	31.2667	15.7	1177	180	14.5	0.213	6.25	1.27	157.512	7860
119.9	31.2667	15.7	1177	180	14.5	0.213	6.25	1.27	157.512	8580
119.9	31.2667	15.7	1250	240	13.1671	0.213	6.25	1.27	157.512	6268.04
119.9	31.2667	15.7	1177	240	14.5	0.213	6.25	1.27	157.512	10140
120.974	31.2692	15	1116	279	17.5754	0.373	7.4	1.26	238.265	8630
120.974	31.2692	15.5	1097.1	292.8	12.5928	0.146	7.4	1.32	238.265	5371
119.923	31.2715	16	1250	243	16.0267	0.213	5.81	1.27	148.35	6605.26
119.923	31.2715	16	1250	270	16.0267	0.213	5.81	1.27	148.354	6729.32
119.883	31.2833	16.3	1150	180	17	0.164	5.4	1.41	178	7460
119.883	31.2833	16.3	1150	180	17	0.164	5.4	1.41	178	9330
119.883	31.2833	16.3	1150	220	17	0.164	5.4	1.41	178	7550
119.883	31.2833	16.3	1150	240	17	0.164	5.4	1.40982	177.948	7920
119.883	31.2833	16.3	1150	240	17	0.164	5.4	1.40982	177.948	10150
119.883	31.2833	16.3	1150	270	17	0.164	5.4	1.40982	177.948	7470
119.883	31.2833	16.3	1150	0	17	0.164	5.4	1.40982	177.948	5410
119.883	31.2833	16.3	1150	0	17	0.164	5.4	1.40982	177.948	6790
119.883	31.2833	16.3	1150	0	17	0.164	5.4	1.40982	177.948	6940
119.683	31.4	15.7	1177	300	23.5	0.39	6.5	1.01	226.484	7600
119.683	31.4	15.7	1177	300	23.5	0.39	6.5	1.01	227	7600
119.693	31.4072	22	1100	300	20.1	0.39	6.04	1.01	227	4803
120.417	31.45	15.7	1100	330	13.7471	0.132	6.9	1.25	203.395	1882.35
120.417	31.45	15.7	1100	0	13.7471	0.132	6.9	1.25	203.395	1364.71
120.01	31.52	15.7	1177	153	18.56	0.376	6.99	1.41	200	3420
120.01	31.52	15.7	1177	153	18.56	0.376	6.99	1.41	200	7770
120.01	31.52	15.7	1177	153	18.56	0.376	6.99	1.41	200	8790
120.01	31.52	15.7	1177	270	18.5615	0.376	6.99	1.41009	200.415	3940
120.01	31.52	15.7	1177	270	18.5615	0.376	6.99	1.41009	200.415	8230
120.01	31.52	15.7	1177	270	18.5615	0.376	6.99	1.41009	200.415	9060
120.01	31.52	15.7	1177	0	18.5615	0.376	6.99	1.41009	200.415	940
120.01	31.52	15.7	1177	0	18.5615	0.376	6.99	1.41009	200.415	5640
120.01	31.52	15.7	1177	0	18.5615	0.376	6.99	1.41009	200.415	7140
120.683	31.5333	15	1090	240	20.1	0.299	7.7	1.2	342.16	8576
120.683	31.5333	15	1090	300	20.1	0.299	7.7	1.2	342.158	8395
120.917	31.5333	15	1103	240	11.6	0.331	7.6	1.2	280.183	7340
120.917	31.5333	15	1103	0	11.6	0.331	7.6	1.2	280.183	4630
120.699	31.5458	15.5	1038	225	20.3	0.44	7.36	1.27	341	8760
120.699	31.5458	15.5	1038	270	20.3	0.44	7.36	1.27	341	9000
120.699	31.5458	15.5	1038	270	20.3	0.44	7.36	1.27	341	10500
120.699	31.5458	15.5	1038	300	20.3016	0.44	7.36	1.26662	341.105	7670
120.699	31.5458	15.5	1038	300	20.3016	0.44	7.36	1.26662	341.105	8100
120.699	31.5458	15.5	1038	0	20.3016	0.44	7.36	1.26662	341.105	5030
120.699	31.5458	15.5	1038	0	20.3016	0.44	7.36	1.26662	341.105	5600
120.699	31.5458	15.5	1038	0	20.3016	0.44	7.36	1.26662	341.105	5900
120.7	31.55	15.7	1177	240	15.4	0.102	5.6	1.27	345.989	7433
120.7	31.55	15.7	1177	240	15.4	0.102	5.6	1.27	345.989	7509
120.7	31.55	15.5	1038	240	22.1578	0.331	7.6	1.27	345.99	9098
120.7	31.55	15.5	1038	300	22.1578	0.331	7.6	1.27	345.989	9041
120.708	31.5592	15.5	1038	225	20.3	0.2883	7.35	1.26	347	7800
120.708	31.5592	15.5	1038	225	20.3	0.2883	7.35	1.26	347	8800
120.708	31.5592	15.5	1038	300	20.3016	0.28834	7.35	1.26242	347.079	7960
120.708	31.5592	15.5	1038	300	20.3016	0.28834	7.35	1.26242	347.079	8990
120.708	31.5592	15.5	1038	0	20.3016	0.28834	7.35	1.26242	347.079	4710
120.708	31.5592	15.5	1038	0	20.3016	0.28834	7.35	1.26242	347.079	4880
120.367	31.6167	15	1093	300	12.6	0.245	6.23	1.41	276.593	5460
120.467	31.6167	16	1150	270	15	0.299	6.8	1.2	329.386	9066.67
120.782	31.6968	15	1084	225	1.83	0.24	4.6	1.26	281	9300
120.782	31.6968	15	1084	225	1.83	0.24	4.6	1.26	281	10500
120.782	31.6968	15	1084	270	1.83	0.24	4.6	1.26	281	8100
120.782	31.6968	15	1084	270	1.83	0.24	4.6	1.26	281	10000
120.782	31.6968	15	1084	300	1.83295	0.24	4.60001	1.26	280.865	8500
120.782	31.6968	15	1084	300	1.83295	0.24	4.60001	1.26	280.865	8600
120.782	31.6968	15	1084	0	1.83295	0.24	4.60001	1.26	280.865	5600
120.782	31.6968	15	1084	0	1.83295	0.24	4.60001	1.26	280.865	5900
118.833	31.8	15.9	1106	250	15.2	0.14	6.4	1.2704	205.839	7170
118.833	31.8	15.9	1106	250	15.2	0.14	6.4	1.2704	205.839	7930
118.833	31.8	15.9	1106	0	15.2	0.14	6.4	1.2704	205.839	4490
118.833	31.8	15.9	1106	0	15.2	0.14	6.4	1.2704	205.839	4560
119.467	31.9048	14	1063	300	12.1926	0.24	6.85	1.25359	227.917	11100
119.467	31.9048	14	1063	300	12.1926	0.24	6.85	1.25359	227.917	12700
119.467	31.9048	14	1063	0	12.1926	0.24	6.85	1.25359	227.917	8000
119.467	31.9048	14	1063	0	12.1926	0.24	6.85	1.25359	227.917	10100
119.472	31.9086	17.5	1056	216	11.4849	0.17	6.4	1.26	227.917	10800
119.472	31.9086	17.5	1056	0	11.4849	0.17	6.4	1.26	227.917	9100
118.983	31.95	15	1100	190	21.09	0.27	7.94	1.18	199.06	9852.63
118.983	31.95	15	1100	230	21.09	0.27	7.94	1.18	199.06	9347.37
118.983	31.95	15	1076	270	12.2332	0.27	7.94	1.18	199.06	11620
118.983	31.95	15	1100	270	21.09	0.27	7.94	1.18	199.06	11621.1
118.983	31.95	15	1076	0	12.2332	0.27	7.94	1.18	199.06	5140
118.8	31.9667	15.7	1050	250	14.7	0.2	5.7	1.46477	182.258	13593
118.8	31.9667	15.7	1050	0	14.7	0.2	5.7	1.46477	182.258	7748
119.3	31.9667	15.1	1019	240	11.5	0.142	6.9	1.23	194.695	8000
119.3	31.9667	15.1	1019	240	11.5	0.142	6.9	1.23	194.695	9380
119.504	31.9938	14	1051	225	13.2193	0.24	6.62	1.26	225.888	7370
119.504	31.9938	14	1051	225	13.2193	0.24	6.62	1.26	225.888	8300
119.504	31.9938	14	1051	0	13.2193	0.24	6.62	1.26	225.888	4710
119.504	31.9938	14	1051	0	13.2193	0.24	6.62	1.26	225.888	6470
119.504	31.9938	14	1051	0	13.2193	0.17	6.62	1.26	225.888	4710
119.504	31.9938	14	1051	0	13.2193	0.17	6.62	1.26	225.888	6470
119.533	32	16.4	882	270	9.9768	0.24	6.8	1.34256	233.149	9000
119.533	32	16.4	882	270	9.9768	0.24	6.8	1.34256	233.149	10600
119.262	32.0242	15	1074	319.5	10.6148	0.17	6.1	1.4	182.768	7928.1
118.875	32.0337	15.4	1106.5	300	10.6148	0.112	6.38	1.28	164.111	12752.7
118.875	32.0337	15.4	1106.5	0	10.6148	0.112	6.38	1.28	164.111	8610.75
118.8	32.0667	15	1061	300	11.891	0.47	6.5	1.31872	147.017	5933
118.8	32.0667	15	1061	0	11.891	0.47	6.5	1.31872	147.017	4768
119.2	32.1	15	1200	270	18.36	0.1	6.1	1.23	160.505	7480
119.2	32.1	15	1200	0	18.36	0.1	6.1	1.23	160.505	4020
120.417	32.2	14	1053	273.75	22.8	0.08	6.38	1.27	261.34	8592.23
120.417	32.2	14	1053	273.75	22.8	0.08	6.38	1.27	261.34	8640.78
120.417	32.2	14	1053	0	22.8	0.08	6.38	1.27	261.34	5825.24
120.417	32.2	14	1053	0	22.8	0.08	6.38	1.27	261.34	6019.42
119.422	32.3893	14	1042	300	5.8	0.08	6.8	1.27	188.211	8182
119.422	32.3893	14	1042	300	5.8	0.08	6.8	1.27	188.211	9438
119.422	32.3893	14	1042	0	5.8	0.08	6.8	1.27	188.211	5017
119.422	32.3893	14	1042	0	5.8	0.08	6.8	1.27	188.211	6241
119.42	32.3921	14	1042	300	6.68	0.207	7.43	1.27	182.954	8478.07
119.42	32.3921	14	1042	300	9.76	0.207	7.19	1.27	182.954	8839.44
119.42	32.3921	14	1042	0	6.68	0.207	7.43	1.27	182.954	3782.63
119.42	32.3921	14	1042	0	9.76	0.207	7.19	1.27	182.954	4548.52
120.119	32.4674	14	1029	225	6.84455	0.0884	7.6	1.39192	234.048	8486.49
120.119	32.4674	14	1029	0	6.84455	0.0884	7.6	1.39192	234.048	5891.89
119.417	32.5	14	1048	240	14.2111	0.21	7.81962	1.34	188.816	9530
119.417	32.5	14	1048	240	14.2111	0.21	7.81962	1.34	188.816	9880
119.417	32.5	14	1048	240	14.2111	0.21	7.81962	1.34	188.816	10180
119.417	32.5	14	1048	270	13.46	0.21	7.81962	1.3	189	9780
119.417	32.5	14	1048	270	13.46	0.21	7.81962	1.3	189	9850
119.417	32.5	14	1048	270	13.46	0.21	7.81962	1.3	189	10670
119.417	32.5	14	1048	270	13.46	0.21	7.81962	1.3	189	10700
119.417	32.5	14	1048	270	13.46	0.21	7.81962	1.3	189	10990
119.417	32.5	14	1048	270	13.46	0.21	7.81962	1.3	189	12140
119.417	32.5	14	1048	300	14.1531	0.21	7.81962	1.34	188.816	8720
119.417	32.5	14	1048	300	13.4571	0.21	7.81962	1.3	188.816	9030
119.417	32.5	14	1048	300	13.4571	0.21	7.81962	1.3	188.816	9630
119.417	32.5	14	1048	300	13.4571	0.21	7.81962	1.3	188.816	9690
119.417	32.5	14	1048	300	14.2111	0.21	7.81962	1.33	188.816	9920
119.417	32.5	14	1048	0	14.2111	0.21	7.81962	1.33	188.816	5200
119.417	32.5	14	1048	0	14.2111	0.21	7.81962	1.34	188.816	5580
119.417	32.5	14	1048	0	14.2111	0.21	7.81962	1.34	188.816	5590
119.417	32.5	14	1048	0	14.2111	0.21	7.81962	1.33	188.816	5590
119.417	32.5	14	1048	0	14.2111	0.21	7.81962	1.34	188.816	5690
119.417	32.5	14	1048	0	13.4571	0.21	7.81962	1.3	188.816	6180
119.417	32.5	14	1048	0	13.4571	0.21	7.81962	1.3	188.816	6470
119.417	32.5	14	1048	0	13.4571	0.21	7.81962	1.3	188.816	7150
119.417	32.5	14	1048	0	13.4571	0.21	7.81962	1.3	188.816	7340
119.533	32.5	14	1047	75	12.7	0.228	6.3	1.4	250	9000
119.533	32.5	14	1047	100	12.7	0.228	6.3	1.4	250	9500
119.533	32.5	14	1047	105	12.7	0.228	6.3	1.4	250	9400
119.533	32.5	14	1047	120	12.7	0.228	6.3	1.4	250	9700
119.533	32.5	14	1047	0	12.7	0.228	6.3	1.4	249.938	6900
119.533	32.5	14	1047	0	12.7	0.228	6.3	1.4	249.938	7500
119.467	32.533	15.5	1019	300	14.62	0.26	5.3	1.39	212.726	8290
119.467	32.533	15.5	1019	300	14.62	0.26	5.3	1.39	212.726	8700
119.467	32.533	15.5	1019	0	14.62	0.26	5.3	1.39	212.726	5310
119.467	32.533	15.5	1019	0	14.62	0.26	5.3	1.39	212.726	6480
119.7	32.5833	15	1150	200	16.8	0.22	6.8	1.12	297.4	7650
119.7	32.5847	15.9	924	150	18.4	0.14	8	1.41	297.4	5080
119.7	32.5847	15.9	924	150	18.4	0.14	8	1.41	297.4	6390
119.7	32.5847	15.9	924	150	18.4	0.14	8	1.41	297.4	7250
119.7	32.5847	15.9	924	150	18.4	0.14	8	1.41	297.4	7290
119.7	32.5847	15.9	924	250	18.4	0.14	8	1.41	297.4	6960
119.667	32.6667	14	1030	270	11.2	0.126	7.8	1.41	277	10100
119.667	32.6667	14	1030	270	11.2	0.126	7.8	1.41	277	12700
119.667	32.6667	14	1030	300	11.2	0.126	7.8	1.41	277.385	9900
119.667	32.6667	14	1030	300	11.2	0.126	7.8	1.41	277.385	10000
119.667	32.6667	14	1030	300	11.2	0.126	7.8	1.41	277.385	11500
119.667	32.6667	14	1030	0	11.2	0.126	7.8	1.41	277.385	5900
119.667	32.6667	14	1030	0	11.2	0.126	7.8	1.41	277.385	6000
119.667	32.6667	14	1030	0	11.2	0.126	7.8	1.41	277.385	6700
119.667	32.6667	14	1030	0	11.2	0.126	7.8	1.41	277.385	7000
119.383	32.8333	14	1017	200	13.6311	0.21	7.8	1.32	223	8400
119.383	32.8333	14	1017	0	13.6311	0.21	7.8	1.32	223	5200
119.383	32.8333	14	1017	0	13.6311	0.21	7.8	1.32	223	5700
114.909	27.0481	18	1487	138.3	20.9281	0.166	5.21	1.41	91.06	6892.35
114.909	27.0481	18	1487	138.3	20.9281	0.166	5.21	1.41	91.06	7480.35
114.909	27.0481	18	1487	144.45	20.9281	0.166	5.21	1.41	91.06	7865.85
114.909	27.0481	18	1487	144.45	20.9281	0.166	5.21	1.41	91.06	7895.55
114.909	27.0481	18	1487	146.85	20.9281	0.166	5.21	1.41	91.06	7120.65
114.909	27.0481	18	1487	146.85	20.9281	0.166	5.21	1.41	91.06	7688.4
114.909	27.0481	18	1487	160.35	20.9281	0.166	5.21	1.41	91.0585	7085.85
114.909	27.0481	18	1487	160.35	20.9281	0.166	5.21	1.41	91.0585	7272.3
114.909	27.0481	18	1487	166.2	20.9281	0.166	5.21	1.41	91.0585	6499.95
114.909	27.0481	18	1487	166.2	20.9281	0.166	5.21	1.41	91.0585	6907.2
114.909	27.0481	18	1487	171	20.9281	0.166	5.21	1.41	91.0585	6444.6
114.909	27.0481	18	1487	171	20.9281	0.166	5.21	1.41	91.0585	7131.15
114.56	28.177	16	1676	165	13	0.315	5.34	1.31	80	6354.7
114.56	28.177	16	1676	195	13	0.315	5.34	1.31	80	7935.4
114.56	28.177	16	1676	0	13	0.315	5.34	1.31	80	2981.4
114.56	28.177	16	1676	0	13	0.315	5.34	1.31	80	5013.8
116.926	28.2053	17.6	1700	150	12.3666	0.24	4.59	1.65	121.557	5480.77
116.926	28.2053	17.6	1700	150	12.3666	0.24	4.59	1.65	121.557	5753.85
116.926	28.2053	17.6	1700	150	12.3666	0.24	4.59	1.65	121.557	5815.38
116.926	28.2053	17.6	1700	0	12.3666	0.24	4.59	1.65	121.557	3230.77
116.926	28.2053	17.6	1700	0	12.3666	0.24	4.59	1.65	121.557	3230.77
116.926	28.2053	17.6	1700	0	12.3666	0.24	4.59	1.65	121.557	3507.69
116.926	28.2053	17.6	1700	0	12.3666	0.24	4.59	1.65	121.557	3769.23
114.925	28.2329	17.6	2107.7	180	19.1879	0.21	5.08	1.42261	79.0863	6272.72
114.925	28.2329	17.6	2107.7	195	19.1879	0.21	5.08	1.42261	79.0863	7812.45
114.925	28.2329	17.6	2107.7	0	19.1879	0.21	5.08	1.42261	79.0863	4923.15
114.925	28.2329	17.6	2107.7	0	19.1879	0.21	5.08	1.42261	79.0863	5374.8
116.333	28.25	17.7	1400	300	17.7	0.391	4.89	1.24	129.276	7920
115.126	28.2572	17.2	1680	165	13.7007	0.169	5.28	1.41	96.2355	9076
115.126	28.2572	17.2	1680	195	13.7007	0.169	5.28	1.41	96.2355	6311
115.126	28.2575	17.6	1718.4	165	11.2	0.169	5.34	1.41	111	6376.8
115.126	28.2575	17.6	1718.4	195	11.2	0.169	5.34	1.41	111	6881.8
115.126	28.2575	17.6	1718.4	0	11.2	0.169	5.34	1.41	111	3589.9
115.126	28.2575	17.6	1718.4	0	11.2	0.169	5.34	1.41	111	4076.5
115.133	28.2667	17	1685.2	140	7.99304	0.21	6.87	1.41	97.3356	5600
115.133	28.2667	17	1685.2	0	7.99304	0.21	6.87	1.41	97.3356	5046
116.167	28.35	18.1	1727	160	16.2	0.367	5.7	1.06	226	4920
116.167	28.35	18.1	1727	0	16.2	0.367	5.7	1.06	226	2840
116.167	28.35	18.1	1727	0	16.2	0.367	5.7	1.06	226	3140
115.933	28.5667	18.4	1632	180	14.8	0.301	6.5	1.26	204	5660
115.933	28.5667	18.4	1632	0	14.8	0.301	6.5	1.26	204	3070
115.933	28.5667	18.4	1632	0	14.8	0.301	6.5	1.26	204	3960
115.617	29.4833	16	1517	150	20.97	0.48	5.31	1.25	52	10080
115.617	29.4833	16	1517	180	20.97	0.48	5.31	1.24641	52.1891	8760
115.617	29.4833	16	1517	0	20.97	0.48	5.31	1.24641	52.1891	7870
119.809	28.3939	15.9	1838	225	14.6752	0.21	4.81	1.41	41.3742	8730
119.809	28.3939	15.9	1838	0	14.6752	0.21	4.81	1.41	41.3742	6983
120.105	28.8911	17.6	1398	225	20.9977	0.23	5.2	1.41	87.86	8088
120.105	28.8911	17.6	1398	225	20.9977	0.23	5.2	1.41	87.86	8157
120.105	28.8911	17.6	1398	225	20.9977	0.23	5.2	1.41	87.86	8372
120.105	28.8911	17.6	1398	270	20.9977	0.23	5.2	1.41	87.8618	7684
120.105	28.8911	17.6	1398	270	20.9977	0.23	5.2	1.41	87.8618	7711
120.105	28.8911	17.6	1398	270	20.9977	0.23	5.2	1.41	87.8618	8707
119.45	29.0167	17.5	1424	180	15.1972	0.21	5.24	1.41	129.794	5370
119.45	29.0167	17.5	1424	180	15.1972	0.21	5.24	1.41	129.794	5470
119.45	29.0167	17.5	1424	180	15.1972	0.21	5.24	1.41	129.794	6040
119.45	29.0167	17.5	1424	180	15.1972	0.21	5.24	1.41	129.794	6660
119.45	29.0167	17.5	1424	180	15.1972	0.21	5.24	1.41	129.794	6770
119.45	29.0167	17.5	1424	180	15.1972	0.21	5.24	1.41	129.794	8280
119.45	29.0167	17.5	1424	180	15.1972	0.21	5.24	1.41	129.794	8380
119.45	29.0167	17.5	1424	0	15.1972	0.21	5.24	1.41	129.794	2170
119.45	29.0167	17.5	1424	0	15.1972	0.21	5.24	1.41	129.794	2680
119.45	29.0167	17.5	1424	0	15.1972	0.21	5.24	1.41	129.794	2690
119.45	29.0167	17.5	1424	0	15.1972	0.21	5.24	1.41	129.794	3340
119.45	29.0167	17.5	1424	0	15.1972	0.21	5.24	1.41	129.794	3630
119.45	29.0167	17.5	1424	0	15.1972	0.21	5.24	1.41	129.794	5300
119.45	29.0167	17.5	1424	0	15.1972	0.21	5.24	1.41	129.794	5330
119.45	29.0167	17.5	1424	0	15.1972	0.21	5.24	1.41	129.794	5430
119.45	29.0167	17.5	1424	0	15.1972	0.21	5.24	1.41	129.794	6020
119.45	29.0167	17.5	1424	0	15.1972	0.21	5.24	1.41	129.794	6440
119.477	29.0219	17.5	1424	180	15.1972	0.204	5.24	1.25	126.996	6661
119.477	29.0219	17.5	1424	180	15.1972	0.204	5.24	1.25	126.996	8284
119.477	29.0219	17.5	1424	0	15.1972	0.204	5.24	1.25	126.996	3625
119.477	29.0219	17.5	1424	0	15.1972	0.204	5.24	1.25	126.996	5296
119.65	29.1167	17	1427	45	16.1	0.135	4.5	1.37	145	6900
119.65	29.1167	17	1427	75	16.1	0.135	4.5	1.37	145	6700
119.65	29.1167	17	1427	110	16.1	0.135	4.5	1.37	145	6800
119.65	29.1167	17	1427	110	16.1	0.135	4.5	1.37	145	7000
119.65	29.1167	17	1427	0	16.1	0.135	4.5	1.36796	144.891	5700
119.65	29.1167	17	1427	0	16.1	0.135	4.5	1.36796	144.891	6700
119.759	29.3491	16	1459	150	14.7332	0.265	6.3	1.41	86.71	7031
119.759	29.3491	16	1459	150	14.7332	0.265	6.3	1.41	86.71	7270
119.759	29.3491	16	1459	0	14.7332	0.265	6.3	1.41	86.71	6698
121.522	29.5649	16	1557	150	14.5592	0.227	5.8	1.41	81.6736	6061
121.522	29.5649	16	1557	150	14.5592	0.227	5.8	1.41	81.6736	6856
121.522	29.5649	16	1557	0	14.5592	0.227	5.8	1.41	81.6736	4849
121.363	29.7922	16.4	1480	240	12.529	0.338	6.17	1.41	157.851	10260
121.363	29.7922	16.4	1480	0	12.529	0.338	6.17	1.41	157.851	8980
119.133	30.0833	16	1250	200	13.2	0.366	5.4	1.31	234	7410
119.133	30.0833	16	1250	200	13.2	0.366	5.4	1.31	234	8870
119.133	30.0833	16	1250	200	13.2	0.366	5.4	1.31	234	8930
119.133	30.0833	16	1250	200	13.2	0.366	5.4	1.31	234	9580
119.133	30.0833	16	1250	200	13.2	0.366	5.4	1.31	234	9790
120.13	30.1144	16	1439	150	15.4872	0.152	7.1	1.41	152.639	7276
120.13	30.1144	16	1439	150	15.4872	0.152	7.1	1.41	152.639	7754
120.13	30.1144	16	1439	0	15.4872	0.152	7.1	1.41	152.639	6381
119.53	30.21	15.75	1350	270	11.2	0.149	5.39	1.41	34.7299	8490
119.854	30.4129	17	1508.5	270	19.3155	0.246	4.98	1.27	119.924	8861.54
119.854	30.4129	17	1508.5	0	19.3155	0.246	4.98	1.27	119.924	5507.69
119.75	30.4167	16.4	1628.6	270	6.68213	0.227	5.46	1.2	83.0746	8159.3
119.75	30.4167	16.4	1628.6	270	6.68213	0.227	5.46	1.2	83.0746	8585.8
119.75	30.4167	16.4	1628.6	0	6.68213	0.227	5.46	1.2	83.0746	6565
119.75	30.4167	16.4	1628.6	0	6.68213	0.227	5.46	1.2	83.0746	7404.9
120.3	30.5	15.5	1300	0	11.4269	0.37	7.2	1.04	213.834	4400
119.748	30.76	15	1468	210	11.2	0.359	4.5	1.41	102.607	6968.8
119.748	30.76	15	1468	270	11.2	0.359	4.5	1.41	102.607	7048.8
119.748	30.76	15	1468	300	11.2	0.359	4.5	1.41	102.607	6982.5
119.772	30.7825	15.6	1413.2	300	11.2	0.338	5.5	1.41	109.131	8109.8
120.667	30.8333	15.7	1200	270	18.2	0.517	6.9	1.33	325.514	6534
120.667	30.8333	15.7	1200	270	18.2	0.517	6.9	1.33	325.514	6818
120.667	30.8333	15.7	1200	270	18.2	0.517	6.9	1.33	325.514	6907
120.667	30.8333	15.7	1200	0	18.2	0.517	6.9	1.33	325.514	4167
120.667	30.8333	15.7	1200	0	18.2	0.517	6.9	1.33	325.514	4384
120.667	30.8333	15.5	1100	0	20.3016	0.517	6.8	1.33	325.514	4400
120.667	30.8333	15.7	1200	0	18.2	0.517	6.9	1.33	325.514	4740
121.091	30.841	15	1251	180	24.652	0.221	5.89	1.28	354.722	7560
121.091	30.841	15	1251	0	24.652	0.221	5.89	1.28	354.722	6225
119.624	30.8864	15	1421	300	16.5313	0.116	5.68	1.3	111	15220.8
119.624	30.8864	15	1421	0	16.5313	0.116	5.68	1.3	111	7898.5
109.598	18.2878	25.5	1347.5	144	7.78	0.1951	5.91	1.35	19	5820
109.598	18.2878	25.5	1347.5	180	7.78422	0.1951	5.91	1.35086	19.252	5753
109.598	18.2878	25.5	1347.5	0	7.78422	0.1951	5.91	1.35086	19.252	4178
109.467	19.5333	25	1607	185	32.558	0.27	4.83	1.36	41.6995	7311.12
110.168	19.7395	23	1773	150	7.77262	0.109	5.57	1.41	51.8443	6497
110.198	19.7533	23	1757	176	12.413	0.46	5.9	1.32975	54.927	7200
110.198	19.7533	23	1757	0	12.413	0.46	5.9	1.32975	54.927	5650
110.414	19.9332	23	1649	150	11.1949	0.258	6.07	0.76	63.8744	7125
110.067	19.9333	24.8	1819.2	105	17.1694	0.168	5.7	1.36	54.1697	6080.1
110.067	19.9333	23.8	1786.1	108.8	12.4594	0.352	5.3	1.36	54.1697	3695
110.067	19.9333	23.8	1786.1	197	12.4594	0.352	5.3	1.36	54.1697	6017
110.067	19.9333	23.8	1786.1	0	12.4594	0.352	5.3	1.36	54.1697	3479
110.067	19.9333	23.8	1786.1	0	12.4594	0.352	5.3	1.36	54.1697	4797
110.067	19.9333	24.8	1819.2	0	17.1694	0.168	5.7	1.36	54.1697	5850.9
115.55	29.85	16	1462	135	21	0.18	5.31	1.39	127	9610
115.55	29.85	16	1462	175.5	16.0093	0.18	5.53	1.39	127.489	7290
115.55	29.85	18	1361	180	24.07	0.129	5.18	1.39	127.489	8542
115.55	29.85	18	1361	180	24.07	0.129	5.18	1.39	127.489	8799
115.55	29.85	16	1462	180	21	0.18	5.31	1.39	127.489	9610
115.55	29.85	16	1462	189	20.0696	0.18	5.68	1.39	127.489	8950
115.55	29.85	16	1462	0	16.0093	0.18	5.53	1.39	127.489	6880
115.55	29.85	16	1462	0	20.0696	0.18	5.68	1.39	127.489	7310
115.55	29.85	16	1462	0	21	0.18	5.31	1.39	127.489	7400
115.55	29.85	18	1361	0	24.07	0.129	5.18	1.39	127.489	7491
115.55	29.85	18	1361	0	24.07	0.129	5.18	1.39	127.489	7681
112.917	29.8667	16	1303	200	14.7912	0.134	6	1.3794	181.173	5500
112.917	29.8667	16	1303	200	14.7912	0.134	6	1.3794	181.173	6100
112.917	29.8667	16	1303	200	14.7912	0.134	6	1.3794	181.173	7700
112.917	29.8667	16	1303	0	14.7912	0.134	6	1.3794	181.173	4500
112.917	29.8667	16	1303	0	14.7912	0.134	6	1.3794	181.173	4600
112.917	29.8667	16	1303	0	14.7912	0.134	6	1.3794	181.173	4600
112.917	29.8667	16	1303	0	14.7912	0.134	6	1.3794	181.173	4900
112.917	29.8667	16	1303	0	14.7912	0.134	6	1.3794	181.173	5200
112.917	29.8667	16	1303	0	14.7912	0.134	6	1.3794	181.173	5600
115.5	29.9167	16.8	1360.65	180	22.7	0.21	6.27	1.12	129	9290
115.5	29.9167	16.8	1360.65	180	22.7	0.21	6.27	1.12	129	9330
115.5	29.9167	16.8	1360.65	0	22.7	0.21	6.27	1.12	129	8760
115.5	29.9167	16.8	1360.65	0	22.7	0.21	6.27	1.12	129	8990
115.5	29.9167	16.8	1360.65	210	29.8	0.0646	5.6	1.26	129	8806.8
115.5	29.9167	16.8	1360.65	0	29.8	0.0646	5.6	1.26	129	6556.2
115.6	29.9833	16	1450	150	21.91	0.21	5.7	1.41	148	9670
115.6	29.9833	16	1450	180	21.91	0.21	5.7	1.41	148.061	8590
115.6	29.9833	16	1450	0	21.91	0.21	5.7	1.41	148.061	7200
115.733	30	16	1431	150	26.75	0.21	6.75	1.41	156	9340
115.733	30	16	1431	180	26.75	0.21	6.75	1.41	155.502	7840
115.733	30	16	1431	0	26.75	0.21	6.75	1.41	155.502	5670
113.533	30.0167	16	1430	180	24.2	0.23	7.47	1.35004	155.427	8424
113.533	30.0167	16	1430	180	24.2	0.23	7.47	1.35004	155.427	8603
113.533	30.0167	16	1430	0	24.2	0.23	7.47	1.35004	155.427	4781
113.533	30.0167	16	1430	0	24.2	0.23	7.47	1.35004	155.427	5302
112.529	30.2458	16.2	1000	195	15.7773	0.166	6.48	1.41	132.836	10267
112.529	30.2458	16.2	1000	0	15.7773	0.166	6.48	1.41	132.836	8200
112.15	30.35	16.2	1200	165	26.88	0.166	7.8	1.44	136.594	6307.5
112.15	30.35	16.2	1200	165	26.88	0.166	7.8	1.44	136.594	6887.3
112.15	30.35	16.2	1200	180	26.88	0.166	7.8	1.44	136.594	7126.7
112.15	30.35	16	1110	180	6.46172	0.166	7.7	1.44	136.594	7656
112.15	30.35	16	1110	180	12.3666	0.166	7.47	1.36	136.594	7683.33
112.15	30.35	16.2	1200	180	26.88	0.166	7.8	1.44	136.594	8422.8
112.15	30.35	16	1110	0	12.3666	0.166	7.47	1.36	136.594	3781.33
112.08	30.36	16.2	1200	165	9.23	0.658	7.62	1.38	142	9207
112.08	30.36	16.2	1200	165	9.23	0.658	7.62	1.38	142	9246
112.08	30.36	16.2	1200	210	9.22854	0.658	7.62	1.38182	142.397	9806
112.08	30.36	16.2	1200	0	9.22854	0.658	7.62	1.38182	142.397	5470
112.623	30.3818	16	1150	168	11.96	0.21	7.1	1.41	152	8348
112.623	30.3818	16	1150	210	11.9606	0.21	7.1	1.41	152.145	7880
112.623	30.3818	16	1150	0	11.9606	0.21	7.1	1.41	152.145	4801
112.623	30.3818	16	1150	140	12.41	0.21	7.2	1.41	152	9125
112.623	30.3818	16	1150	180	12.41	0.21	7.2	1.41	152	8089
112.623	30.3818	16	1150	180	12.413	0.21	7.2	1.41	152.145	8736
112.623	30.3818	16	1150	0	12.413	0.21	7.2	1.41	152.145	6898
112.102	30.3831	16	1150	195	25.3	0.096	6.4	1.4	152.075	4140
112.102	30.3831	16	1150	195	25.3	0.096	6.4	1.4	152.075	4680
112.102	30.3831	16	1150	195	25.3	0.096	6.4	1.4	152.075	6540
112.25	30.4333	15.4	1200	165	18.91	0.21	6.1	1.41	121	8700
112.204	30.4415	16	1121	202.5	17.7494	0.21	7.8	1.41	143.39	7645
112.204	30.4415	16	1121	0	17.7494	0.21	7.8	1.41	143.39	6138
114.357	30.4754	16	1384	180	11.0209	0.44	5.8	1.28	74.0511	9170.1
114.357	30.4754	16	1384	0	11.0209	0.44	5.8	1.28	74.0511	6159.2
112.31	30.7351	16	1025	165	10.8469	0.21	6.5	1.41	206.03	8384
112.31	30.7351	16	1025	0	10.8469	0.21	6.5	1.41	206.03	5672
113.933	30.9833	16	1160	80	6.9	0.323	6.1	1.41	131	8180
113.933	30.9833	16	1160	80	6.9	0.323	6.1	1.41	131	8370
113.933	30.9833	16	1160	102	14.4	0.29	5.78	1.41	131	5900
113.933	30.9833	16	1160	102	14.4	0.29	5.78	1.41	131	6600
113.933	30.9833	16	1160	120	6.9	0.323	6.1	1.41	131	8760
113.933	30.9833	16	1160	120	6.9	0.323	6.1	1.41	131	8850
113.933	30.9833	16	1160	130	6.9	0.323	6.1	1.41	131	8490
113.933	30.9833	16	1160	150	14.4	0.29	5.78	1.41	130.867	6000
113.933	30.9833	16	1160	150	14.4	0.29	5.78	1.41	130.867	6800
113.933	30.9833	16	1160	155	6.9	0.323	6.1	1.41	130.867	8880
113.933	30.9833	16	1160	170	6.9	0.323	6.1	1.41	130.867	8940
113.933	30.9833	16	1160	0	14.4	0.29	5.78	1.41	130.867	3600
113.933	30.9833	16	1160	0	14.4	0.29	5.78	1.41	130.867	4300
113.933	30.9833	16	1160	0	6.9	0.323	6.1	1.41	130.867	5630
113.933	30.9833	16	1160	0	6.9	0.323	6.1	1.41	130.867	6810
111.802	30.9948	15	1064	165	14.3271	0.1	6.49	1.43049	45.6714	6767
111.802	30.9948	15	1064	0	14.3271	0.1	6.49	1.43049	45.6714	4767
111.802	30.9948	15	1064	0	14.3271	0.1	6.49	1.43049	45.6714	6000
110.617	32.6333	14	835	150	8.64269	0.016	6.2	1.43	80	7157.89
110.617	32.6333	14	835	150	8.64269	0.016	6.2	1.43	80	7913.04
110.617	32.6333	14	835	0	8.64269	0.016	6.2	1.43	80	3878.26
110.617	32.6333	14	835	0	8.64269	0.016	6.2	1.43	80	4035.09
111.867	26.75	17.8	1290	72.5	12.4	0.281	4.8	1.25	83	4130
111.867	26.75	17.8	1290	72.5	12.4	0.281	4.8	1.25	83	5290
111.873	26.7533	18	1250	72.5	12.181	0.281	5.2	1.41	118	4295.7
111.873	26.7533	18	1250	72.5	12.181	0.281	5.2	1.41	118	5172
111.873	26.7533	18	1250	0	12.181	0.281	5.2	1.41	118	2572.2
111.873	26.7533	18	1250	0	12.181	0.281	5.2	1.41	118	3514
111.877	26.756	17	1268	150	14.3271	0.346	5.6	1.41	80.3035	5690
111.877	26.756	17	1268	150	14.3271	0.346	5.6	1.41	80.3035	7060
111.877	26.7572	17	1266	150	14.3271	0.281	5.6	1.25	80.3035	4180
111.877	26.7572	17	1266	150	14.3271	0.281	5.6	1.25	80.3035	6860
111.877	26.7572	17	1266	0	14.3271	0.281	5.6	1.25	80.3035	3150
111.877	26.7572	17	1266	0	14.3271	0.281	5.6	1.25	80.3035	3360
111.877	26.7572	17	1266	0	14.3271	0.281	5.6	1.25	80.3035	4200
111.877	26.7572	17	1266	0	14.3271	0.281	5.6	1.25	80.3035	4420
113.2	28.1333	17.1	1500	240	18.76	0.346	6.21	0.91	109.572	7850
113.2	28.1383	17.1	1500	270	19.3	0.346	6	1.41	111.367	8361
113.2	28.1383	17.1	1500	270	19.3	0.346	6	1.41	111.367	8810
113.2	28.1383	17.1	1500	270	19.3	0.346	6	1.41	111.367	9998
113.2	28.1383	17.1	1500	0	19.3	0.346	6	1.41	111.367	7770
113.2	28.1383	17.1	1500	0	19.3	0.346	6	1.41	111.367	8468
113.2	28.1383	17.1	1500	0	19.3	0.346	6	1.41	111.367	8730
113.617	28.15	17.5	1551.3	120	18.4	0.198	6.3	1.14	35.0495	6970
113.617	28.15	17.5	1551.3	120	18.4	0.198	6.3	1.14	35.0495	7950
113.617	28.15	17.5	1551.3	120	18.4	0.198	6.3	1.14	35.0495	8160
113.617	28.15	17.5	1551.3	135	18.4	0.198	6.3	1.14	35.0495	7660
113.617	28.15	17.5	1551.3	135	18.4	0.198	6.3	1.14	35.0495	9670
113.617	28.15	17.5	1551.3	135	18.4	0.198	6.3	1.14	35.0495	9990
113.617	28.15	17.5	1551.3	150	18.4	0.198	6.3	1.14	35.0495	6870
113.617	28.15	17.5	1551.3	165	18.4	0.198	6.3	1.14	35.0495	9940
113.617	28.15	17.5	1551.3	0	18.4	0.198	6.3	1.14	35.0495	3230
113.617	28.15	17.5	1551.3	0	18.4	0.198	6.3	1.14	35.0495	5080
113.617	28.15	17.5	1551.3	0	18.4	0.198	6.3	1.14	35.0495	5230
113.617	28.15	17.5	1551.3	0	18.4	0.198	6.3	1.14	35.0495	5590
113.617	28.15	17.5	1551.3	0	18.4	0.198	6.3	1.14	35.0495	5860
113.617	28.15	17.5	1551.3	0	18.4	0.198	6.3	1.14	35.0495	7590
113.617	28.15	17.2	1361	120	18.4	0.4766	6.3	1.14	35	6970
113.617	28.15	17.2	1361	120	18.4	0.4766	6.3	1.14	35	7950
113.617	28.15	17.2	1361	120	18.4	0.4766	6.3	1.14	35	8160
113.617	28.15	16	1405	120	22.56	0.48	5.89	1.25	35	8580
113.617	28.15	16	1405	120	22.56	0.48	5.89	1.25	35	8980
113.617	28.15	17.2	1361	135	18.4	0.4766	6.3	1.14	35	7660
113.617	28.15	16	1405	135	23.49	0.48	6.25	1.25204	35.0495	8710
113.617	28.15	16	1405	135	23.49	0.48	6.25	1.25204	35.0495	8840
113.617	28.15	16	1405	135	23.49	0.48	6.25	1.25204	35.0495	8920
113.617	28.15	17.2	1361	135	18.4	0.4766	6.3	1.14	35	9670
113.617	28.15	16	1405	135	23.49	0.48	6.25	1.25204	35.0495	9780
113.617	28.15	17.2	1361	135	18.4	0.4766	6.3	1.14	35	9990
113.617	28.15	16	1405	150	22.5638	0.48	5.89	1.25204	35.0495	8770
113.617	28.15	17.2	1361	0	18.4	0.476565	6.3	1.14	35.0495	3230
113.617	28.15	16	1405	0	23.49	0.48	6.25	1.25204	35.0495	4580
113.617	28.15	17.2	1361	0	18.4	0.476565	6.3	1.14	35.0495	5080
113.617	28.15	17.2	1361	0	18.4	0.476565	6.3	1.14	35.0495	5230
113.617	28.15	16	1405	0	23.49	0.48	6.25	1.25204	35.0495	5460
113.617	28.15	17.2	1361	0	18.4	0.476565	6.3	1.14	35.0495	5590
113.617	28.15	16	1405	0	23.49	0.48	6.25	1.25204	35.0495	5610
113.617	28.15	16	1405	0	23.49	0.48	6.25	1.25204	35.0495	5650
113.617	28.15	17.2	1361	0	18.4	0.476565	6.3	1.14	35.0495	5860
113.617	28.15	16	1405	0	22.5638	0.48	5.89	1.25204	35.0495	5880
113.617	28.15	16	1405	0	22.5638	0.48	5.89	1.25204	35.0495	6150
113.617	28.15	16	1405	0	22.5638	0.48	5.89	1.25204	35.0495	6890
113.617	28.15	17.2	1361	0	18.4	0.476565	6.3	1.14	35.0495	7590
113.071	28.1864	17	1405	161	16.0673	0.21	5.8	1.41	131.372	10230
113.071	28.1864	17	1405	0	16.0673	0.21	5.8	1.41	131.372	7430
113.085	28.1948	16.8	1400	150	13.8051	0.3642	4.92	1.41	133.458	6354.2
113.085	28.1948	16.8	1400	150	25.6381	0.7764	7.67	1.41	133.458	6375.5
113.085	28.1948	16.8	1400	150	13.8051	0.3642	4.92	1.41	133.458	6388.6
113.085	28.1948	16.8	1400	150	25.6381	0.7764	7.67	1.41	133.458	6743.6
113.085	28.1948	16.8	1400	0	25.6381	0.7764	7.67	1.41	133.458	4685.4
113.085	28.1948	16.8	1400	0	13.8051	0.3642	4.92	1.41	133.458	5249.6
113.085	28.1948	16.8	1400	0	13.8051	0.3642	4.92	1.41	133.458	5434.7
113.085	28.1948	16.8	1400	0	25.6381	0.7764	7.67	1.41	133.458	5488.6
112.433	28.2	16.8	1358	150	33.8167	0.21	6.5	1.41459	140.697	5624
112.433	28.2	16.8	1358	180	33.8167	0.21	6.5	1.41459	140.697	8653
112.433	28.2	16.8	1358	0	33.8167	0.21	6.5	1.41459	140.697	3963
112.433	28.2	16.8	1358	0	33.8167	0.21	6.5	1.41459	140.697	5063
112.467	28.2167	16	1387	75	19.9	0.248	5.8	1.42	151	7000
112.467	28.2167	16	1387	90	19.9	0.248	5.8	1.42	151	7700
112.467	28.2167	16	1387	100	19.9	0.248	5.8	1.42	151	6900
112.467	28.2167	16	1387	110	19.9	0.248	5.8	1.42	151	7900
112.467	28.2167	16	1387	180	19.9	0.248	5.8	1.42176	151.125	6200
112.467	28.2167	16	1387	0	19.9	0.248	5.8	1.42176	151.125	5600
112.467	28.2167	16	1387	0	19.9	0.248	5.8	1.42176	151.125	6600
113.856	28.2904	16	1587	150	8.10325	0.21	5.7	1.42556	46.5382	5559
113.856	28.2904	16	1587	180	8.10325	0.21	5.7	1.42556	46.5382	5459.3
113.856	28.2904	16	1587	0	8.10325	0.21	5.7	1.42556	46.5382	2568.7
113.856	28.2904	16	1587	0	8.10325	0.21	5.7	1.42556	46.5382	3351.6
113.862	28.2957	16	1589	150	8.10325	0.198	5.7	1.41	46.5543	6088
113.862	28.2957	16	1589	180	8.10325	0.198	5.7	1.41	46.5543	6180
113.862	28.2957	16	1589	0	8.10325	0.198	5.7	1.41	46.5543	3670
113.862	28.2957	16	1589	0	8.10325	0.198	5.7	1.41	46.5543	4808
113.817	28.3167	17.4	1538.2	150	9.64037	0.346	5.61	1.41	48.2435	5250.7
113.817	28.3167	17.4	1538.2	180	9.64037	0.346	5.61	1.41	48.2435	6171
112.78	28.8905	17	1312	127.5	14.98	0.21	4.9	1.36	123	7507
112.78	28.8905	17	1312	150	14.9768	0.21	4.9	1.36	122.536	6437
112.78	28.8905	17	1312	0	14.9768	0.21	4.9	1.36	122.536	4563
112.933	28.9167	16.9	1353	150	15.9861	0.21	5.12	1.36	126.989	6812.35
112.933	28.9167	16.9	1353	0	15.9861	0.21	5.12	1.36	126.989	5214.56
112.933	28.9167	16.9	1353	180	15.9861	0.21	5.12	1.36	126.989	8417
112.933	28.9167	16.9	1353	0	15.9861	0.21	5.12	1.36	126.989	6088.3
112.763	28.9736	16.7	1465	120	22.74	0.21	6.1	1.39	125	7493.98
112.763	28.9736	16.7	1465	132	22.74	0.21	6.1	1.39	125	7903.61
112.763	28.9736	16.7	1465	150	22.7436	0.21	6.1	1.38979	124.843	6650.6
112.763	28.9736	16.7	1465	165	22.7436	0.21	6.1	1.38979	124.843	6867.47
112.763	28.9736	16.7	1465	0	22.7436	0.21	6.1	1.38979	124.843	4819.28
112.763	28.9736	16.7	1465	0	22.7436	0.21	6.1	1.38979	124.843	6144.58
111.629	29.1925	16.7	1348	180	16.4733	0.21	6.2	1.41149	135.161	9259.5
111.629	29.1925	16.7	1348	0	16.4733	0.21	6.2	1.41149	135.161	7302
113.103	29.3092	16.7	1537.8	120	18.34	0.27	6.1	1.23	29	8578.31
113.103	29.3092	16.7	1537.8	132	18.34	0.27	6.1	1.23	29	7614.46
113.103	29.3092	16.7	1537.8	150	18.3411	0.27	6.1	1.22884	28.7164	7228.92
113.103	29.3092	16.7	1537.8	165	18.3411	0.27	6.1	1.22884	28.7164	6843.37
113.103	29.3092	16.7	1537.8	0	18.3411	0.27	6.1	1.22884	28.7164	3807.23
113.103	29.3092	16.7	1537.8	0	18.3411	0.27	6.1	1.22884	28.7164	4433.73
118.133	25.6333	17.5	1788	150	14.24	0.164	5.18	1.19062	13.2327	10610
118.133	25.6333	17.5	1788	150	14.24	0.164	5.18	1.19062	13.2327	10620.7
118.133	25.6333	17.5	1788	0	14.24	0.164	5.18	1.19062	13.2327	6310.34
118.133	25.6333	17.5	1788	0	14.24	0.164	5.18	1.19062	13.2327	6330
104.932	25.1211	16	1483	161	30.5104	0.46	7.9	1.4132	16.1359	12920
104.932	25.1211	16	1483	0	30.5104	0.46	7.9	1.4132	16.1359	11090
108.753	26.9426	13	1027	150	11.0391	0.43	6.59344	1.32956	19.3969	8837.48
108.753	26.9426	13	1027	0	11.0391	0.43	6.59344	1.32956	19.3969	7047.83
108.193	27.7597	17.5	1200	150	17.181	0.21	5.86	1.40826	24.8956	7020
108.193	27.7597	17.5	1200	0	17.181	0.21	5.86	1.40826	24.8956	5000
108.193	27.7597	17.5	1200	150	17.181	0.204	5.86	1.41	39	5300
108.193	27.7597	17.5	1200	0	17.181	0.204	5.86	1.41	39	5000
123.11	41.85	8	703	180	20.68	0.141	7.38	1.41	131.193	3878.05
123.11	41.85	8	703	225	20.6845	0.141	7.38	1.41	131.193	4207.32
123.11	41.85	8	703	0	20.6845	0.141	7.38	1.41	131.193	1536.59
123.117	41.8667	8	690	210	6.70534	0.23	6.05	1.38	132.025	9552.47
123.117	41.8667	8	690	210	6.70534	0.23	6.05	1.38	132.025	9580.96
123.35	42.0833	8.3	716	270	15.4872	0.21	6.2	1.38164	61.0353	9142.86
105.861	29.772	17.8	1003	150	19.8376	0.21	8	1.36605	66.4368	9430.46
105.861	29.772	17.8	1003	0	19.8376	0.21	8	1.36605	66.4368	8238.41
133	45.33	3	551	179.7	35.5	0.2331	6.92	1.26	25.363	7110.9
133	45.33	3	551	179.7	35.5	0.2331	6.92	1.26	25.363	7490.15
133	45.33	3	551	224.55	35.4988	0.2331	6.92	1.26	25.363	7632.39
133	45.33	3	551	224.55	35.4988	0.2331	6.92	1.26	25.363	8248.66
133	45.33	3	551	0	35.4988	0.2331	6.92	1.26	25.363	4086.42
133	45.33	3	551	0	35.4988	0.2331	6.92	1.26	25.363	7964.18
128.803	45.8228	2	616	165	14.9652	0.351	6.67	1.3	63	9022.5
128.803	45.8228	2	616	140.25	14.97	0.351	6.67	1.3	63	9372.2
132.95	46.5167	2.8	557.2	133.5	23.9327	0.271	5.8	1.54	57.2332	9676.93
132.95	46.5167	2.8	557.2	0	23.9327	0.271	5.8	1.54	57.2332	7962.24
123.689	47.2623	3	475	135	16.1253	0.23	7.2	1.38208	19.2176	10228.9
123.689	47.2623	3	475	135	16.1253	0.23	7.2	1.38208	19.2176	10695.1
123.689	47.2623	3	475	0	16.1253	0.23	7.2	1.38208	19.2176	7002.8
123.689	47.2623	3	475	0	16.1253	0.23	7.2	1.38208	19.2176	7275.8

## Sheet: N2O
Longitude	Latitude	Province	Prefecture	Tem	Pre	rate	n	SOC	TN	Clay	CEC	pH	BD	irrigation	Maize	Rice	Wheat	N2O
121.732	30.8666	上海市	奉贤	15	1180	225	3	7.5406	0.91	0.17	11	7.89	1.36	198.199	FALSE	TRUE	FALSE	0.21
121.732	30.8666	上海市	奉贤	15	1180	0	3	7.5406	0.91	0.17	11	7.89	1.36	198.199	FALSE	TRUE	FALSE	0.15
121.75	30.87	上海市	奉贤	15	1178	375	3	7.5406	1.47	0.2025	11	7.9	1.39	169.861	FALSE	TRUE	FALSE	0.3
121.75	30.87	上海市	奉贤	15	1178	0	3	7.5406	1.47	0.2025	11	7.9	1.39	169.861	FALSE	TRUE	FALSE	0.15
121.383	30.8833	上海市	奉贤	15	1207	225	3	13.7	1.4	0.21	11	7.6	1.4	334.969	FALSE	TRUE	FALSE	0.19
121.383	30.8833	上海市	奉贤	15	1207	225	3	13.7	1.4	0.21	11	7.6	1.4	334.969	FALSE	TRUE	FALSE	0.43
121.383	30.8833	上海市	奉贤	15	1207	225	3	13.7	1.4	0.21	11	7.6	1.4	334.969	FALSE	TRUE	FALSE	1.04
121.383	30.8833	上海市	奉贤	15	1207	0	3	13.7	1.4	0.21	11	7.6	1.4	334.969	FALSE	TRUE	FALSE	0.19
121.383	30.8833	上海市	奉贤	15	1207	0	3	13.7	1.4	0.21	11	7.6	1.4	334.969	FALSE	TRUE	FALSE	0.19
121.383	30.8833	上海市	奉贤	15	1207	0	3	13.7	1.4	0.21	11	7.6	1.4	334.969	FALSE	TRUE	FALSE	0.2
121.133	31.2	上海市	青浦	16.7	1087.3	300	3	16.2819	1.2	0.245	10	7.06	1.34	334.889	FALSE	TRUE	FALSE	1.52
121.133	31.2	上海市	青浦	16.7	1087.3	300	3	16.2819	1.2	0.245	10	7.06	1.34	334.889	FALSE	TRUE	FALSE	2.1
121.133	31.2	上海市	青浦	16.7	1087.3	0	3	16.2819	1.2	0.245	10	7.06	1.34	334.889	FALSE	TRUE	FALSE	0.1
121.133	31.2	上海市	青浦	16.7	1087.3	0	3	16.2819	1.2	0.245	10	7.06	1.34	334.889	FALSE	TRUE	FALSE	0.48
106.567	40.4333	内蒙古自治区	巴彦淖尔	7.9	136.5	487.5	3	7.42	0.8	0.05	6	8.2	1.41	73	FALSE	FALSE	TRUE	8.22
107.166	40.9111	内蒙古自治区	巴彦淖尔	7.7	143	240	3	7.68561	1.21	0.135	11	8.2	1.41	70.2966	TRUE	FALSE	FALSE	4.97
107.166	40.9111	内蒙古自治区	巴彦淖尔	7.7	143	0	3	7.68561	1.21	0.135	11	8.2	1.41	70.2966	TRUE	FALSE	FALSE	0.76
108.591	40.9824	内蒙古自治区	巴彦淖尔	5.35	225	375	4	8.46868	0.5	0.31296	13	8.3	1.30704	54.9402	TRUE	FALSE	FALSE	5.44
108.591	40.9824	内蒙古自治区	巴彦淖尔	5.35	225	0	4	8.46868	0.5	0.31296	13	8.3	1.30704	54.9402	TRUE	FALSE	FALSE	0.4
120.5	42.1333	内蒙古自治区	赤峰	5	428	210	3	7.07657	1.11	0.175	13	7.4	1.5	100	FALSE	TRUE	FALSE	0.43547
120.5	42.1333	内蒙古自治区	赤峰	5	428	210	3	7.07657	1.11	0.175	13	7.4	1.5	100	FALSE	TRUE	FALSE	0.45958
116	39.6	北京市	房山	11.6	687	150	3	9.22274	0.93	0.1976	6	8.3	1.36	164	FALSE	FALSE	TRUE	0.61
116	39.6	北京市	房山	11.6	687	150	3	9.22274	0.93	0.1976	6	8.3	1.36	164	TRUE	FALSE	FALSE	4.52
116	39.6	北京市	房山	11.6	687	300	3	9.22274	0.93	0.1976	6	8.3	1.36	164.301	TRUE	FALSE	FALSE	11.23
116	39.6	北京市	房山	11.6	687	0	3	9.22274	0.93	0.1976	6	8.3	1.36	164.301	FALSE	FALSE	TRUE	0.32
116	39.6	北京市	房山	11.6	687	0	3	9.22274	0.93	0.1976	6	8.3	1.36	164.301	TRUE	FALSE	FALSE	1.09
116.467	39.8	北京市	大兴	10	600	110	3	7.1	0.8	0.28	16	8.1	1.31	140.77	TRUE	FALSE	FALSE	1.09
116.467	39.8	北京市	大兴	10	600	130	3	7.1	0.8	0.28	16	8.1	1.31	140.77	FALSE	FALSE	TRUE	0.75
116.467	39.8	北京市	大兴	10	600	150	3	7.1	0.8	0.28	16	8.1	1.31	140.77	TRUE	FALSE	FALSE	0.72
116.467	39.8	北京市	大兴	10	600	212	3	7.1	0.8	0.28	16	8.1	1.31	140.77	FALSE	FALSE	TRUE	0.89
116.467	39.8	北京市	大兴	11	597	130	3	7.1	0.8	0.28	16	8.1	1.31	141	TRUE	FALSE	FALSE	0.385
116.467	39.8	北京市	大兴	11	597	130	3	7.1	0.8	0.28	16	8.1	1.31	141	TRUE	FALSE	FALSE	0.714
116.467	39.8	北京市	大兴	11	597	150	3	7.1	0.8	0.28	16	8.1	1.31	141	FALSE	FALSE	TRUE	0.481
116.467	39.8	北京市	大兴	11	597	150	3	7.1	0.8	0.28	16	8.1	1.31	141	FALSE	FALSE	TRUE	0.762
116.467	39.8	北京市	大兴	11	597	150	3	7.1	0.8	0.28	16	8.1	1.31	141	FALSE	FALSE	TRUE	0.907
116.467	39.8	北京市	大兴	11	597	212	3	7.1	0.8	0.28	16	8.1	1.31	141	TRUE	FALSE	FALSE	1.093
116.467	39.8	北京市	大兴	11	597	260	3	7.1	0.8	0.28	16	8.1	1.31	140.773	TRUE	FALSE	FALSE	0.596
116.467	39.8	北京市	大兴	11	597	260	3	7.1	0.8	0.28	16	8.1	1.31	140.773	TRUE	FALSE	FALSE	1.791
116.467	39.8	北京市	大兴	11	597	260	3	7.1	0.8	0.28	16	8.1	1.31	140.773	TRUE	FALSE	FALSE	1.976
116.467	39.8	北京市	大兴	11	597	300	3	7.1	0.8	0.28	16	8.1	1.31	140.773	FALSE	FALSE	TRUE	1.135
116.467	39.8	北京市	大兴	11	597	300	3	7.1	0.8	0.28	16	8.1	1.31	140.773	FALSE	FALSE	TRUE	1.465
116.467	39.8	北京市	大兴	11	597	300	3	7.1	0.8	0.28	16	8.1	1.31	140.773	FALSE	FALSE	TRUE	1.5
116.467	39.8	北京市	大兴	11	597	0	3	7.1	0.8	0.28	16	8.1	1.31	140.773	TRUE	FALSE	FALSE	0.115
116.467	39.8	北京市	大兴	11	597	0	3	7.1	0.8	0.28	16	8.1	1.31	140.773	TRUE	FALSE	FALSE	0.116
116.467	39.8	北京市	大兴	11	597	0	3	7.1	0.8	0.28	16	8.1	1.31	140.773	FALSE	FALSE	TRUE	0.14
116.467	39.8	北京市	大兴	11	597	0	3	7.1	0.8	0.28	16	8.1	1.31	140.773	TRUE	FALSE	FALSE	0.167
116.467	39.8	北京市	大兴	11	597	0	3	7.1	0.8	0.28	16	8.1	1.31	140.773	FALSE	FALSE	TRUE	0.212
116.467	39.8	北京市	大兴	11	597	0	3	7.1	0.8	0.28	16	8.1	1.31	140.773	FALSE	FALSE	TRUE	0.286
116.29	39.96	北京市	海淀	13.5	591	160	2	6.67	1.03	0.09	6	6.5	1.44	173	TRUE	FALSE	FALSE	4.1
116.29	39.96	北京市	海淀	13.5	591	240	2	6.67053	1.03	0.09	6	6.5	1.44	173	TRUE	FALSE	FALSE	2.4
116.497	40.3869	北京市	怀柔	14.5	700	0	3	9	0.765342	0.169	16	8	1.41	209	TRUE	FALSE	FALSE	2.1
115.962	40.5221	北京市	延庆	6	421	225	3	9.80278	0.71	0.236	16	8.2	1.40891	140	TRUE	FALSE	FALSE	2.88
124.809	43.5064	吉林省	长春	4.5	550	165	3	13.2	1.4	0.23	20	7.6	1.17	18.9622	TRUE	FALSE	FALSE	1.8
124.809	43.5064	吉林省	长春	4.5	550	165	3	13.2	1.4	0.23	20	7.6	1.17	18.9622	TRUE	FALSE	FALSE	2.7
124.809	43.5064	吉林省	长春	5.6	594.8	230	4	15.2552	1.5	0.23	20	6.2	1.31	18.9622	TRUE	FALSE	FALSE	17.79
124.809	43.5064	吉林省	长春	5.6	594.8	230	4	15.2552	1.5	0.23	20	6.2	1.31	18.9622	TRUE	FALSE	FALSE	30.55
124.809	43.5064	吉林省	长春	4.5	550	0	3	13.2	1.4	0.23	20	7.6	1.17	18.9622	TRUE	FALSE	FALSE	0.87
124.809	43.5064	吉林省	长春	4.5	550	0	3	13.2	1.4	0.23	20	7.6	1.17	18.9622	TRUE	FALSE	FALSE	0.92
124.809	43.5064	吉林省	长春	5.6	594.8	0	4	15.2552	1.5	0.23	20	6.2	1.31	18.9622	TRUE	FALSE	FALSE	5.7
124.809	43.5064	吉林省	长春	5.6	594.8	0	4	15.2552	1.5	0.23	20	6.2	1.31	18.9622	TRUE	FALSE	FALSE	7.25
123.367	43.5167	吉林省	四平	7.5	675	180	3	13.72	1.22	0.035	6	7.75	1.4	43	FALSE	TRUE	FALSE	0.2145
123.367	43.5167	吉林省	四平	7.5	675	0	3	13.72	1.22	0.035	6	7.75	1.4	43	FALSE	TRUE	FALSE	0.0591
124.883	43.5667	吉林省	长春	4.5	525	180	3	14.9014	1.34	0.265	20	5.45	1.37	60	TRUE	FALSE	FALSE	0.67
124.883	43.5667	吉林省	长春	4.5	525	0	3	14.9014	1.34	0.265	20	5.45	1.37	60	TRUE	FALSE	FALSE	0.28
125.37	43.82	吉林省	长春	4.6	650	180	3	12.181	0.8	0.295	20	8.1	1.3	22.1873	TRUE	FALSE	FALSE	3
125.37	43.82	吉林省	长春	4.6	650	0	3	12.181	0.8	0.295	20	8.1	1.3	22.1873	TRUE	FALSE	FALSE	1.09
104.567	30.0833	四川省	资阳	16.8	965.8	150	3	19.7216	1.7	0.449	12	8.2	1.3	49.4344	FALSE	TRUE	FALSE	0.382
104.57	30.0867	四川省	资阳	16.8	965.8	300	3	5.33643	0.53	0.449	12	7.9	1.3	50.0727	TRUE	FALSE	FALSE	0.53
104.57	30.0867	四川省	资阳	16.8	965.8	0	3	5.33643	0.53	0.449	12	7.9	1.3	50.0727	TRUE	FALSE	FALSE	0.08
104.57	30.0867	四川省	资阳	16.8	965.8	0	3	5.33643	0.53	0.449	12	7.9	1.3	50.0727	TRUE	FALSE	FALSE	0.08
105.067	30.175	四川省	资阳	16	1025	220	3	7.5	0.86	0.164	17	8.52	1.37	37.6035	FALSE	TRUE	FALSE	1.73
105.067	30.175	四川省	资阳	16	1025	0	3	7.5	0.86	0.164	17	8.52	1.37	37.6035	FALSE	TRUE	FALSE	0.37
105.448	30.3367	四川省	遂宁	17.3	836	0	3	6.96056	0.87	0.129	17	8.3	1.5	61.1206	FALSE	FALSE	TRUE	0.2
105.448	30.3367	四川省	遂宁	17.3	836	0	3	6.40951	0.92	0.129	17	8.28	1.44	61.1206	TRUE	FALSE	FALSE	0.45
103.734	30.9503	四川省	成都	15.2	1200	180	3	16.4733	1.87	0.122	11	6.63	1.41	104.545	FALSE	TRUE	FALSE	0.90615
103.734	30.9503	四川省	成都	15.2	1200	180	3	16.4733	1.87	0.122	11	6.63	1.41	104.545	FALSE	FALSE	TRUE	1.05192
103.734	30.9503	四川省	成都	15.2	1200	0	3	16.4733	1.87	0.122	11	6.63	1.41	104.545	FALSE	TRUE	FALSE	0.10947
103.734	30.9503	四川省	成都	15.2	1200	0	3	16.4733	1.87	0.122	11	6.63	1.41	104.545	FALSE	FALSE	TRUE	0.25572
104.167	31.05	四川省	德阳	16.5	807	240	3	20.11	1.81	0.221	11	5.99	1.1	158.29	FALSE	TRUE	FALSE	1.88
105.45	31.2667	四川省	绵阳	17.3	836	130	3	13.35	1.26	0.187	17	8.29	1.16	25.5773	TRUE	FALSE	FALSE	0.662
105.45	31.2667	四川省	绵阳	17.3	836	150	3	13.35	1.26	0.187	17	8.29	1.16	25.5773	FALSE	FALSE	TRUE	0.295
105.45	31.2667	四川省	绵阳	17.3	826	150	3	5.07541	0.62	0.21	17	8.28	1.33	25.5773	TRUE	FALSE	FALSE	2.19
105.45	31.2667	四川省	绵阳	17.3	836	0	3	13.35	1.26	0.187	17	8.29	1.16	25.5773	FALSE	FALSE	TRUE	0.178
105.45	31.2667	四川省	绵阳	17.3	836	0	3	13.35	1.26	0.187	17	8.29	1.16	25.5773	TRUE	FALSE	FALSE	0.337
105.45	31.2667	四川省	绵阳	17.3	826	0	3	5.07541	0.62	0.21	17	8.28	1.33	25.5773	TRUE	FALSE	FALSE	0.56
105.45	31.2667	四川省	绵阳	17.3	826	130	3	6.57193	0.75	0.215	17	8.36	1.54	56	FALSE	FALSE	TRUE	4.88
105.45	31.2667	四川省	绵阳	17.3	826	150	3	6.57193	0.75	0.215	17	8.36	1.54	56	TRUE	FALSE	FALSE	11.35
105.467	31.2667	四川省	绵阳	17.3	826	0	3	6.35	0.55	0.129	17	8.3	1.32	65	FALSE	FALSE	TRUE	0.03
105.467	31.2667	四川省	绵阳	17.3	826	0	3	6.35	0.55	0.129	17	8.3	1.32	65	TRUE	FALSE	FALSE	0.12
105.45	31.2667	四川省	绵阳	17.3	836	130	3	5.07541	0.81	0.065	17	8.2	1.34	25.5773	FALSE	FALSE	TRUE	0.36
105.45	31.2667	四川省	绵阳	15	949	150	3	6.96056	0.87	0.21	17	8.3	1.37	25.5773	TRUE	FALSE	FALSE	4.84
105.45	31.2667	四川省	绵阳	17.3	836	0	3	5.07541	0.81	0.065	17	8.2	1.34	25.5773	FALSE	FALSE	TRUE	0.19
105.45	31.2667	四川省	绵阳	17.3	836	0	3	5.07541	0.81	0.065	17	8.2	1.34	25.5773	TRUE	FALSE	FALSE	0.6
105.45	31.2667	四川省	绵阳	15	949	0	3	6.96056	0.87	0.21	17	8.3	1.37	25.5773	TRUE	FALSE	FALSE	1.29
105.467	31.2667	四川省	绵阳	17.3	826	130	3	8.75	0.62	0.192	17	8.22	1.32	26.6953	FALSE	FALSE	TRUE	0.59
105.467	31.2667	四川省	绵阳	17.3	826	130	3	6.35	0.55	0.21	17	8.3	1.32	26.6953	FALSE	FALSE	TRUE	0.72
105.467	31.2667	四川省	绵阳	17.3	826	130	3	8.75	0.62	0.192	17	8.22	1.32	26.6953	FALSE	FALSE	TRUE	0.73
105.467	31.2667	四川省	绵阳	15	952	150	3	6.96056	0.87	0.21	17	8.3	1.37	26.6953	FALSE	FALSE	TRUE	0.52
105.467	31.2667	四川省	绵阳	17.3	826	150	3	8.75	0.62	0.192	17	8.22	1.32	26.6953	TRUE	FALSE	FALSE	0.64
105.467	31.2667	四川省	绵阳	17.3	826	150	3	8.75	0.62	0.192	17	8.22	1.32	26.6953	TRUE	FALSE	FALSE	0.69
105.467	31.2667	四川省	绵阳	17.3	826	0	3	6.35	0.55	0.21	17	8.3	1.32	26.6953	FALSE	FALSE	TRUE	0.03
105.467	31.2667	四川省	绵阳	17.3	826	0	3	6.35	0.55	0.21	17	8.3	1.32	26.6953	TRUE	FALSE	FALSE	0.12
105.467	31.2667	四川省	绵阳	17.3	826	0	3	8.75	0.62	0.192	17	8.22	1.32	26.6953	FALSE	FALSE	TRUE	0.19
105.467	31.2667	四川省	绵阳	17.3	826	0	3	8.75	0.62	0.192	17	8.22	1.32	26.6953	TRUE	FALSE	FALSE	0.19
105.467	31.2667	四川省	绵阳	17.3	826	0	3	8.75	0.62	0.192	17	8.22	1.32	26.6953	FALSE	FALSE	TRUE	0.19
105.467	31.2667	四川省	绵阳	17.3	826	0	3	8.75	0.62	0.192	17	8.22	1.32	26.6953	TRUE	FALSE	FALSE	0.23
105.467	31.2667	四川省	绵阳	15	952	0	3	6.96056	0.87	0.21	17	8.3	1.37	26.6953	FALSE	FALSE	TRUE	0.4
106.467	31.2833	四川省	南充	17.3	826	130	3	4.21	0.25	0.391	11	8	1.39	65.0557	FALSE	FALSE	TRUE	0.17
106.467	31.2833	四川省	南充	17.3	826	150	3	4.21	0.25	0.391	11	8	1.39	65.0557	TRUE	FALSE	FALSE	1.69
106.467	31.2833	四川省	南充	17.3	826	0	3	4.21	0.25	0.391	11	8	1.39	65.0557	FALSE	FALSE	TRUE	0.03
106.467	31.2833	四川省	南充	17.3	826	0	3	4.21	0.25	0.391	11	8	1.39	65.0557	TRUE	FALSE	FALSE	0.03
106.467	31.2833	四川省	南充	17.3	824	0	3	6.35	0.55	0.192	11	8.3	1.32	65.0557	FALSE	FALSE	TRUE	0.19
106.467	31.2833	四川省	南充	17.3	824	0	3	6.35	0.55	0.192	11	8.3	1.32	65.0557	FALSE	FALSE	TRUE	0.19
106.467	31.2833	四川省	南充	17.3	824	0	3	6.35	0.55	0.192	11	8.3	1.32	65.0557	TRUE	FALSE	FALSE	0.19
106.467	31.2833	四川省	南充	17.3	824	0	3	6.35	0.55	0.192	11	8.3	1.32	65.0557	TRUE	FALSE	FALSE	0.23
105.75	31.4333	四川省	南充	17.2	732	200	3	19.36	1.81	0.393	11	8.53	1.04	41.823	FALSE	TRUE	FALSE	0.892
105.75	31.4333	四川省	南充	17.2	732	0	3	19.36	1.81	0.393	11	8.53	1.04	41.823	FALSE	TRUE	FALSE	0.029
106.295	38.1206	宁夏回族自治区	银川	6	193	240	3	8.63	0.98	0.183	11	8.59	1.37	103	FALSE	TRUE	FALSE	2.49
106.295	38.1206	宁夏回族自治区	银川	6	193	240	3	8.63	0.98	0.183	11	8.59	1.37	103	FALSE	TRUE	FALSE	2.69
106.295	38.1206	宁夏回族自治区	银川	6	193	300	3	8.63	0.98	0.183	11	8.59	1.37	103	FALSE	TRUE	FALSE	2.86
106.295	38.1206	宁夏回族自治区	银川	6	193	300	3	8.63	0.98	0.183	11	8.59	1.37	103	FALSE	TRUE	FALSE	3.27
106.295	38.1206	宁夏回族自治区	银川	6	193	0	3	8.63	0.98	0.183	11	8.59	1.37	103	FALSE	TRUE	FALSE	1.1
106.295	38.1206	宁夏回族自治区	银川	6	193	0	3	8.63	0.98	0.183	11	8.59	1.37	103	FALSE	TRUE	FALSE	1.24
106.193	38.1239	宁夏回族自治区	吴忠	9.4	192.9	240	3	9.33875	1.08	0.1825	11	7.8	1.33	92.2375	FALSE	TRUE	FALSE	1.87
106.267	38.1333	宁夏回族自治区	银川	8	190	240	3	8.12065	0.99	0.18	11	8.5	1.4	101	FALSE	TRUE	FALSE	25.28
106.267	38.1333	宁夏回族自治区	银川	8	190	240	3	8.12065	0.99	0.18	11	8.5	1.4	101	FALSE	TRUE	FALSE	27.27
106.267	38.1333	宁夏回族自治区	银川	8	190	300	3	8.12065	0.99	0.18	11	8.5	1.4	101	FALSE	TRUE	FALSE	24.14
106.267	38.1333	宁夏回族自治区	银川	8	190	300	3	8.12065	0.99	0.18	11	8.5	1.4	101	FALSE	TRUE	FALSE	48.86
106.267	38.1333	宁夏回族自治区	银川	8	190	0	3	8.12065	0.99	0.18	11	8.5	1.4	101	FALSE	TRUE	FALSE	8.05
106.267	38.1333	宁夏回族自治区	银川	8.9	192.9	300	3	8.62529	0.95	0.21	11	8.59	1.6	62.6968	FALSE	TRUE	FALSE	2.814
106.267	38.1333	宁夏回族自治区	银川	8.9	192.9	300	3	8.62529	0.95	0.21	11	8.59	1.6	62.6968	FALSE	TRUE	FALSE	3.088
106.267	38.1333	宁夏回族自治区	银川	8.9	192.9	0	3	8.62529	0.95	0.21	11	8.59	1.6	62.6968	FALSE	TRUE	FALSE	0.837
106.267	38.1333	宁夏回族自治区	银川	8.9	192.9	0	3	8.62529	0.95	0.21	11	8.59	1.6	62.6968	FALSE	TRUE	FALSE	1
119.517	31.1167	安徽省	宣城	15.7	1333	120	3	13.2251	1.56	0.059	19.6	6.36	1.44	116.771	FALSE	FALSE	TRUE	0.14
119.517	31.1167	安徽省	宣城	15.7	1333	150	3	13.2251	1.56	0.059	19.6	6.36	1.44	116.771	FALSE	FALSE	TRUE	0.32
119.517	31.1167	安徽省	宣城	15.7	1333	180	3	13.2251	1.56	0.059	19.6	6.36	1.44	116.771	FALSE	FALSE	TRUE	0.45
119.517	31.1167	安徽省	宣城	15.7	1333	200	3	13.2251	1.56	0.059	19.6	6.36	1.44	116.771	FALSE	TRUE	FALSE	2.08
119.517	31.1167	安徽省	宣城	13	1331	300	3	14.9072	1.35	0.164	10.7	6.2	1.44	116.771	FALSE	FALSE	TRUE	3.347
119.517	31.1167	安徽省	宣城	13	1331	0	3	14.9072	1.35	0.164	10.7	6.2	1.44	116.771	FALSE	FALSE	TRUE	1.911
117.288	31.257	安徽省	合肥	15.8	1149.1	210	3	13.6543	1.43	0.323	11	5.73	1.41	248.847	FALSE	TRUE	FALSE	1.84
117.288	31.257	安徽省	合肥	15.8	1149.1	210	3	13.6543	1.43	0.323	11	5.73	1.41	248.847	FALSE	TRUE	FALSE	2.17
117.21	31.9307	安徽省	合肥	15.3	1000	240	3	10.4872	1.31	0.21	11	6.41	1.40954	253.308	TRUE	FALSE	FALSE	3.14
117.21	31.9307	安徽省	合肥	15.3	1000	0	3	10.4872	1.31	0.21	11	6.41	1.40954	253.308	FALSE	FALSE	TRUE	0.54
117.21	31.9307	安徽省	合肥	15.3	1000	0	3	10.4872	1.31	0.21	11	6.41	1.40954	253.308	TRUE	FALSE	FALSE	0.6
117.45	32.4333	安徽省	滁州	15.7	998	0	3	12.1578	1.15	0.262	11	7.8	1.41	195.402	TRUE	FALSE	FALSE	0.32
117.45	32.4333	安徽省	滁州	15.7	998	0	3	12.1578	1.15	0.262	11	7.8	1.41	195.402	FALSE	FALSE	TRUE	0.49
117.417	32.45	安徽省	滁州	15.3	998	240	3	12.181	1.8	0.262	11	7.8	1.41	188.264	TRUE	FALSE	FALSE	2.24
117.417	32.45	安徽省	滁州	15.3	998	0	3	12.181	1.8	0.262	11	7.8	1.41	188.264	FALSE	FALSE	TRUE	0.74
117.417	32.45	安徽省	滁州	15.3	998	0	3	12.181	1.8	0.262	11	7.8	1.41	188.264	TRUE	FALSE	FALSE	1.42
118.2	32.7167	安徽省	滁州	14	992	300	3	14.3852	1.46	0.448	22.2	8.29	1.36563	169	FALSE	FALSE	TRUE	3.93
118.2	32.7167	安徽省	滁州	14	992	0	3	14.3852	1.46	0.448	22.2	8.29	1.36563	169	FALSE	FALSE	TRUE	1.765
117.067	32.9	安徽省	蚌埠	15.4	900	143	3	9.39095	0.969943	0.21	11	6.68	1.41	132.944	FALSE	TRUE	FALSE	1.05
117.067	32.9	安徽省	蚌埠	15.4	900	0	3	9.39095	0.969943	0.21	11	6.68	1.41	132.944	FALSE	TRUE	FALSE	0.28
117.067	33.6833	安徽省	宿州	15.7	1000	240	3	10.9049	1.3	0.39	14	8.2	1.4	268	FALSE	FALSE	TRUE	1.43
117.067	33.6833	安徽省	宿州	15.7	1000	240	3	10.9049	1.3	0.39	14	8.2	1.4	268	FALSE	FALSE	TRUE	2.38
117.067	33.6833	安徽省	宿州	15.7	1000	240	3	10.9049	1.3	0.39	14	8.2	1.4	268	TRUE	FALSE	FALSE	4.19
117.067	33.6833	安徽省	宿州	15.7	1000	240	3	10.9049	1.3	0.39	14	8.2	1.4	268	TRUE	FALSE	FALSE	5.59
117.067	33.6833	安徽省	宿州	15.7	1000	0	3	10.9049	1.3	0.39	14	8.2	1.4	268	FALSE	FALSE	TRUE	0.39
117.067	33.6833	安徽省	宿州	15.7	1000	0	3	10.9049	1.3	0.39	14	8.2	1.4	268	TRUE	FALSE	FALSE	0.42
117.067	33.6833	安徽省	宿州	15.7	1000	0	3	10.9049	1.3	0.39	14	8.2	1.4	268	TRUE	FALSE	FALSE	0.48
117.067	33.6833	安徽省	宿州	15.7	1000	0	3	10.9049	1.3	0.39	14	8.2	1.4	268	FALSE	FALSE	TRUE	0.63
117.05	35.9667	山东省	泰安	13	728	300	3	22.93	0.82	0.24	16	6.3	1.04	130.287	TRUE	FALSE	FALSE	5.38
117.05	35.9667	山东省	泰安	13	728	300	3	22.93	0.82	0.24	16	6.3	1.04	130.287	TRUE	FALSE	FALSE	6.16
117.05	35.9667	山东省	泰安	13	728	300	3	22.93	0.82	0.24	16	6.3	1.04	130.287	TRUE	FALSE	FALSE	7.93
117.05	35.9667	山东省	泰安	13	728	0	3	22.93	0.82	0.24	16	6.3	1.04	130.287	TRUE	FALSE	FALSE	0.17
117.05	35.9667	山东省	泰安	13	728	0	3	22.93	0.82	0.24	16	6.3	1.04	130.287	TRUE	FALSE	FALSE	0.18
117.05	35.9667	山东省	泰安	13	728	0	3	22.93	0.82	0.24	16	6.3	1.04	130.287	TRUE	FALSE	FALSE	0.32
117.15	36.15	山东省	泰安	12	697	200	3	6.5	0.94	0.153	16	8	1.54	103.509	TRUE	FALSE	FALSE	0.95
117.15	36.15	山东省	泰安	12	718	200	3	7.88863	1.4	0.153	16	7.2	1.2	103.509	TRUE	FALSE	FALSE	1.96
117.15	36.15	山东省	泰安	12	717	200	3	7.47	0.95	0.243341	16	7.28	1.39	219	TRUE	FALSE	FALSE	1.98
117.15	36.15	山东省	泰安	12	718	0	3	7.88863	1.4	0.153	16	7.2	1.2	103.509	TRUE	FALSE	FALSE	0.31
117.15	36.15	山东省	泰安	12	717	0	3	7.47	0.95	0.243341	16	7.28	1.39	219	TRUE	FALSE	FALSE	0.55
117.15	36.15	山东省	泰安	12	718	0	3	7.88863	1.4	0.153	16	7.2	1.2	103.509	TRUE	FALSE	FALSE	0.77
117.151	36.1542	山东省	泰安	12	715	200	3	4.75638	0.62	0.14	16	7.3	1.54	103.509	FALSE	TRUE	FALSE	0.257
117.151	36.1542	山东省	泰安	12	715	200	3	4.75638	0.62	0.14	16	7.3	1.54	103.509	FALSE	TRUE	FALSE	0.26
117.15	36.16	山东省	泰安	13.6	471	225	3	7.5406	1	0.239861	16	6.30394	1.53965	99.9648	TRUE	FALSE	FALSE	3.12
117.15	36.16	山东省	泰安	13.6	471	225	3	7.5406	1	0.239861	16	6.30394	1.53965	99.9648	TRUE	FALSE	FALSE	6.71
117.15	36.16	山东省	泰安	13.6	471	0	3	7.5406	1	0.239861	16	6.30394	1.53965	99.9648	TRUE	FALSE	FALSE	1.39
117.15	36.16	山东省	泰安	13.6	471	0	3	7.5406	1	0.239861	16	6.30394	1.53965	99.9648	TRUE	FALSE	FALSE	2
117.169	36.178	山东省	泰安	13	700	225	3	7.16	0.69	0.24	16	6.88	1.39	219	TRUE	FALSE	FALSE	2.02
117.133	36.1833	山东省	泰安	13.6	903.2	225	3	9.83179	1.6	0.219963	13	6.99	1.4298	220	FALSE	FALSE	TRUE	1.87
117.133	36.1833	山东省	泰安	13.6	903.2	240	3	9.83179	1.6	0.219963	13	6.99	1.4298	220	TRUE	FALSE	FALSE	1.79
117.133	36.1833	山东省	泰安	13.6	903.2	0	3	9.83179	1.6	0.219963	13	6.99	1.4298	220	TRUE	FALSE	FALSE	0.6
117.133	36.1833	山东省	泰安	13.6	903.2	0	3	9.83179	1.6	0.219963	13	6.99	1.4298	220	FALSE	FALSE	TRUE	0.89
117.133	36.1833	山东省	泰安	13.6	447.9	240	3	9.83179	1.6	0.153	13	6.99	1.43	343	TRUE	FALSE	FALSE	1.24
117.2	36.3	山东省	泰安	12	905	225	3	7.4826	1	0.158	13	6.5	1.43	343	TRUE	FALSE	FALSE	6.86
117.2	36.3	山东省	泰安	12	905	225	3	7.4826	1	0.158	13	6.5	1.43	343	TRUE	FALSE	FALSE	10.42
117.2	36.3	山东省	泰安	12	905	0	3	7.4826	1	0.158	13	6.5	1.43	343	TRUE	FALSE	FALSE	0.7
117.2	36.3	山东省	泰安	12	905	0	3	7.4826	1	0.158	13	6.5	1.43	343	TRUE	FALSE	FALSE	2
117.59	36.57	山东省	济南	12.5	542.8	300	4	10.0348	1.1	0.38	16	7.8	1.4	179	FALSE	FALSE	TRUE	1.41
117.59	36.57	山东省	济南	12.5	542.8	300	4	10.0348	1.1	0.38	16	7.8	1.4	179	TRUE	FALSE	FALSE	2.01
117.59	36.57	山东省	济南	12.5	542.8	0	4	10.0348	1.1	0.38	16	7.8	1.4	179	FALSE	FALSE	TRUE	0.38
117.59	36.57	山东省	济南	12.5	542.8	0	4	10.0348	1.1	0.38	16	7.8	1.4	179	TRUE	FALSE	FALSE	0.6
117.369	36.7281	山东省	济南	13	678	255	3	8.87471	0.8	0.263	16	7.8	1.41	169.863	FALSE	FALSE	TRUE	2.75
117.369	36.7281	山东省	济南	13	678	210	3	8.87	0.8	0.263	16	7.8	1.41	170	FALSE	FALSE	TRUE	2.44
117.369	36.7281	山东省	济南	13	678	210	3	8.87	0.8	0.263	16	7.8	1.41	170	FALSE	FALSE	TRUE	2.58
116.567	36.8333	山东省	德州	13.4	569.6	0	3	7.33179	0.73	0.063	10	8.69	1.36	358.28	TRUE	FALSE	FALSE	0.22
116.567	36.8333	山东省	德州	13.4	569.6	0	3	7.33179	0.73	0.063	10	8.69	1.36	358.28	FALSE	FALSE	TRUE	0.44
117.833	36.85	山东省	淄博	12.5	524.3	180	3	10.28	1.05	0.17	6	8.8	1.44	200	FALSE	FALSE	TRUE	0.78
117.833	36.85	山东省	淄博	12.5	524.3	240	3	10.28	1.05	0.17	6	8.8	1.44	200	TRUE	FALSE	FALSE	1.73
117.833	36.85	山东省	淄博	12.5	524.3	0	3	10.2842	1.05	0.17	6	8.8	1.44	200.231	TRUE	FALSE	FALSE	0.45
117.833	36.85	山东省	淄博	12.5	524.3	0	3	10.2842	1.05	0.17	6	8.8	1.44	200.231	FALSE	FALSE	TRUE	0.72
117.833	36.8639	山东省	滨州	12.5	542.8	189	3	10.03	1.1	0.1034	6	7.8	1.4	203	FALSE	FALSE	TRUE	0.79
117.833	36.8639	山东省	滨州	12.5	542.8	231	3	10.03	1.1	0.1034	6	7.8	1.4	203	TRUE	FALSE	FALSE	1.46
117.833	36.8639	山东省	滨州	12.5	542.8	270	3	10.0348	1.1	0.103432	6	7.8	1.4	203.382	FALSE	FALSE	TRUE	1.01
117.833	36.8639	山东省	滨州	12.5	542.8	330	3	10.0348	1.1	0.103432	6	7.8	1.4	203.382	TRUE	FALSE	FALSE	2.13
117.833	36.8639	山东省	滨州	12.5	542.8	0	3	10.0348	1.1	0.103432	6	7.8	1.4	203.382	FALSE	FALSE	TRUE	0.34
117.833	36.8639	山东省	滨州	12.5	542.8	0	3	10.0348	1.1	0.103432	6	7.8	1.4	203.382	TRUE	FALSE	FALSE	0.59
117.967	36.95	山东省	淄博	12.5	587	152	3	11.08	1.13	0.329	6	6.5	1.55	189	TRUE	FALSE	FALSE	0.83
117.967	36.95	山东省	淄博	12.5	587	200	3	11.08	1.13	0.329	6	6.5	1.55	189	FALSE	FALSE	TRUE	1.174
117.967	36.95	山东省	淄博	12.5	587	228	3	11.0789	1.13	0.329	6	6.5	1.55	188.757	TRUE	FALSE	FALSE	0.924
117.967	36.95	山东省	淄博	12.5	587	300	3	11.0789	1.13	0.329	6	6.5	1.55	188.757	FALSE	FALSE	TRUE	1.311
117.967	36.95	山东省	淄博	12.5	587	0	3	11.0789	1.13	0.329	6	6.5	1.55	188.757	FALSE	FALSE	TRUE	0.644
117.967	36.95	山东省	淄博	12.5	587	0	3	11.0789	1.13	0.329	6	6.5	1.55	188.757	TRUE	FALSE	FALSE	0.657
117.987	36.9625	山东省	淄博	12.5	543	300	4	12.66	0.41	0.14	6	7.76	1.58	186.305	FALSE	FALSE	TRUE	0.944
117.987	36.9625	山东省	淄博	12	514	300	3	10	1.1	0.38	6	7.7	1.4	186.305	FALSE	FALSE	TRUE	1.11
117.987	36.9625	山东省	淄博	12	514	300	3	10	1.1	0.38	6	7.7	1.4	186.305	TRUE	FALSE	FALSE	1.23
117.987	36.9625	山东省	淄博	12.5	543	300	4	12.66	0.41	0.14	6	7.76	1.58	186.305	TRUE	FALSE	FALSE	1.262
117.987	36.9625	山东省	淄博	12	514	0	3	10	1.1	0.38	6	7.7	1.4	186.305	FALSE	FALSE	TRUE	0.14
117.987	36.9625	山东省	淄博	12	514	0	3	10	1.1	0.38	6	7.7	1.4	186.305	TRUE	FALSE	FALSE	0.25
117.987	36.9625	山东省	淄博	12.5	543	0	4	12.66	0.41	0.14	6	7.76	1.58	186.305	TRUE	FALSE	FALSE	0.452
117.987	36.9625	山东省	淄博	12.5	543	0	4	12.66	0.41	0.14	6	7.76	1.58	186.305	FALSE	FALSE	TRUE	0.507
117.987	36.9625	山东省	淄博	12.5	587	225	3	10.03	0.75	0.329	6	6.5	1.48	186	FALSE	FALSE	TRUE	0.9
117.987	36.9625	山东省	淄博	12.5	587	225	3	10.09	0.84	0.329	6	6.5	1.51	186	FALSE	FALSE	TRUE	1.1
117.987	36.9625	山东省	淄博	12.5	587	225	3	10.03	0.75	0.329	6	6.5	1.48	186	TRUE	FALSE	FALSE	2.5
117.987	36.9625	山东省	淄博	12.5	587	225	3	10.09	0.84	0.329	6	6.5	1.51	186	TRUE	FALSE	FALSE	3
117.987	36.9625	山东省	淄博	12.5	587	345	3	10.0928	0.84	0.329	6	6.5	1.51	186.305	TRUE	FALSE	FALSE	4.7
117.987	36.9625	山东省	淄博	12.5	587	0	3	10.0928	0.84	0.329	6	6.5	1.51	186.305	FALSE	FALSE	TRUE	0.3
117.987	36.9625	山东省	淄博	12.5	587	0	3	10.0348	0.75	0.329	6	6.5	1.48	186.305	FALSE	FALSE	TRUE	0.4
117.987	36.9625	山东省	淄博	12.5	587	0	3	10.0928	0.84	0.329	6	6.5	1.51	186.305	TRUE	FALSE	FALSE	0.6
117.987	36.9625	山东省	淄博	12.5	587	0	3	10.0348	0.75	0.329	6	6.5	1.48	186.305	TRUE	FALSE	FALSE	1
117.983	36.9667	山东省	淄博	12.4	600	200	3	8.7007	0.81	0.03	6	8.1	1.51	184.785	TRUE	FALSE	FALSE	1.46
117.983	36.9667	山东省	淄博	12.5	543	0	3	6.3	0.41	0.14	6	7.7	1.5	184.785	TRUE	FALSE	FALSE	0.45
117.983	36.9667	山东省	淄博	12.5	543	0	3	6.3	0.41	0.14	6	7.7	1.5	184.785	FALSE	FALSE	TRUE	0.5
117.983	36.9667	山东省	淄博	12.5	543	180	3	10.9	1.05	0.38	6	7.7	1.5	185	FALSE	FALSE	TRUE	0.31
117.983	36.9667	山东省	淄博	12.5	543	180	3	10.9	1.05	0.38	6	7.7	1.5	185	FALSE	FALSE	TRUE	0.38
117.983	36.9667	山东省	淄博	12.5	543	180	3	10.9	1.05	0.38	6	7.7	1.5	185	FALSE	FALSE	TRUE	0.74
117.983	36.9667	山东省	淄博	12.5	543	240	3	10.9	1.05	0.38	6	7.7	1.5	185	TRUE	FALSE	FALSE	0.76
117.983	36.9667	山东省	淄博	12.5	543	240	3	10.9	1.05	0.38	6	7.7	1.5	185	TRUE	FALSE	FALSE	1.22
117.983	36.9667	山东省	淄博	12.5	543	240	3	10.9	1.05	0.38	6	7.7	1.5	185	TRUE	FALSE	FALSE	2.52
117.983	36.9667	山东省	淄博	12.5	543	270	3	10.9049	1.05	0.38	6	7.7	1.5	184.785	FALSE	FALSE	TRUE	0.34
117.983	36.9667	山东省	淄博	12.5	543	270	3	10.9049	1.05	0.38	6	7.7	1.5	184.785	FALSE	FALSE	TRUE	0.77
117.983	36.9667	山东省	淄博	12.5	543	270	3	10.9049	1.05	0.38	6	7.7	1.5	184.785	FALSE	FALSE	TRUE	1.51
117.983	36.9667	山东省	淄博	12.5	543	330	3	10.9049	1.05	0.38	6	7.7	1.5	184.785	TRUE	FALSE	FALSE	1.03
117.983	36.9667	山东省	淄博	12.5	543	330	3	10.9049	1.05	0.38	6	7.7	1.5	184.785	TRUE	FALSE	FALSE	1.29
117.983	36.9667	山东省	淄博	12.5	543	330	3	10.9049	1.05	0.38	6	7.7	1.5	184.785	TRUE	FALSE	FALSE	2.71
117.983	36.9667	山东省	淄博	12.5	543	0	3	10.9049	1.05	0.38	6	7.7	1.5	184.785	TRUE	FALSE	FALSE	0.09
117.983	36.9667	山东省	淄博	12.5	543	0	3	10.9049	1.05	0.38	6	7.7	1.5	184.785	FALSE	FALSE	TRUE	0.17
117.983	36.9667	山东省	淄博	12.5	543	0	3	10.9049	1.05	0.38	6	7.7	1.5	184.785	FALSE	FALSE	TRUE	0.22
117.983	36.9667	山东省	淄博	12.5	543	0	3	10.9049	1.05	0.38	6	7.7	1.5	184.785	FALSE	FALSE	TRUE	0.23
117.983	36.9667	山东省	淄博	12.5	543	0	3	10.9049	1.05	0.38	6	7.7	1.5	184.785	TRUE	FALSE	FALSE	0.28
117.983	36.9667	山东省	淄博	12.5	543	0	3	10.9049	1.05	0.38	6	7.7	1.5	184.785	TRUE	FALSE	FALSE	0.33
116.334	37.3539	山东省	德州	12.9	547.5	315	3	7.95244	0.69	0.022	10	8.02	1.48	146.643	FALSE	FALSE	TRUE	2.16
116.322	37.4601	山东省	德州	12.9	547.5	255	3	7.63921	0.8	0.221787	13	8.59	1.36784	137.317	TRUE	FALSE	FALSE	1.12
116.322	37.4601	山东省	德州	12.9	547.5	315	3	7.63921	0.8	0.221787	13	8.59	1.36784	137.317	FALSE	FALSE	TRUE	1.25
118.05	37.48	山东省	滨州	12.7	564.8	200	3	7.94664	0.9	0.17	10	8.3	1.38197	129.181	TRUE	FALSE	FALSE	2.802
120.5	37.5	山东省	烟台	17.8	1361	180	3	24.07	2.39	0.189356	12	5.18	1.1979	84.9139	FALSE	TRUE	FALSE	0.79
120.5	37.5	山东省	烟台	17.8	1361	180	3	24.07	2.39	0.189356	12	5.18	1.1979	84.9139	FALSE	TRUE	FALSE	1.22
120.5	37.5	山东省	烟台	17.8	1361	0	3	24.07	2.39	0.189356	12	5.18	1.1979	84.9139	FALSE	TRUE	FALSE	0.17
120.5	37.5	山东省	烟台	17.8	1361	0	3	24.07	2.39	0.189356	12	5.18	1.1979	84.9139	FALSE	TRUE	FALSE	0.59
110.71	34.9252	山西省	运城	13	571	180	4	3.83	0.64	0.1388	10	8.0872	1.43488	121	FALSE	FALSE	TRUE	1.32
110.71	34.9252	山西省	运城	13	571	250	4	3.83	0.64	0.1388	10	8.0872	1.43488	121	TRUE	FALSE	FALSE	3.18
112.85	37.6333	山西省	晋中	9.3	430	120	3	9.45	1.79	0.2112	16	8.5	1.33	55	TRUE	FALSE	FALSE	0.69
112.85	37.6333	山西省	晋中	9.3	430	120	3	9.45	1.79	0.2112	16	8.5	1.33	55	TRUE	FALSE	FALSE	0.78
112.85	37.6333	山西省	晋中	9.3	430	120	3	9.45	1.79	0.2112	16	8.5	1.33	55	TRUE	FALSE	FALSE	0.86
112.85	37.6333	山西省	晋中	21.2	283	180	3	9.45476	1.79	0.211215	16	7.5	1.33	54.6133	TRUE	FALSE	FALSE	1.17
112.85	37.6333	山西省	晋中	9.3	430	180	3	9.80278	1.79	0.211215	16	7.5	1.33	144	TRUE	FALSE	FALSE	1.19
112.85	37.6333	山西省	晋中	21.2	283	0	3	9.45476	1.79	0.211215	16	7.5	1.33	54.6133	TRUE	FALSE	FALSE	0.18
112.85	37.6333	山西省	晋中	9.3	430	0	3	9.80278	1.79	0.211215	16	7.5	1.33	144	TRUE	FALSE	FALSE	0.21
112.85	37.6333	山西省	晋中	9.3	430	0	3	9.45476	1.79	0.211215	16	8.5	1.33	54.6133	TRUE	FALSE	FALSE	0.21
112.85	37.6333	山西省	晋中	9.8	450	180	3	9.45476	1.79	0.187	16	8.5	1.33	144	TRUE	FALSE	FALSE	1.21
112.85	37.6333	山西省	晋中	9.3	430	180	3	9.80278	1.79	0.187	16	7.5	1.33	145	TRUE	FALSE	FALSE	1.53
112.85	37.6333	山西省	晋中	9.8	450	180	3	9.45476	1.79	0.187	16	8.5	1.33	144	TRUE	FALSE	FALSE	1.72
112.85	37.6333	山西省	晋中	9.8	450	180	3	9.45476	1.79	0.187	16	8.5	1.33	144	TRUE	FALSE	FALSE	1.79
112.85	37.6333	山西省	晋中	9.8	450	0	3	9.45476	1.79	0.187	16	8.5	1.33	144	TRUE	FALSE	FALSE	0.14
112.85	37.6333	山西省	晋中	9.8	450	0	3	9.45476	1.79	0.187	16	8.5	1.33	144	TRUE	FALSE	FALSE	0.25
112.85	37.6333	山西省	晋中	9.3	430	0	3	9.80278	1.79	0.187	16	7.5	1.33	145	TRUE	FALSE	FALSE	0.26
112.85	37.6333	山西省	晋中	9.8	450	0	3	9.45476	1.79	0.187	16	8.5	1.33	144	TRUE	FALSE	FALSE	0.34
112.85	37.6333	山西省	晋中	9.8	450	0	3	9.45476	1.79	0.187	16	8.5	1.33	144	TRUE	FALSE	FALSE	0.51
112.95	37.7	山西省	晋中	8	426	150	3	6.78654	0.58	0.072	16	7.73	1.21	96	FALSE	FALSE	TRUE	0.942
112.95	37.7	山西省	晋中	8	426	0	3	6.78654	0.58	0.072	16	7.73	1.21	96	FALSE	FALSE	TRUE	0.107
112.724	38.2987	山西省	忻州	9.5	445	293	3	4.35615	0.38	0.173055	16	8.39	1.43874	42	TRUE	FALSE	FALSE	2.063
112.724	38.2987	山西省	忻州	9.5	445	0	3	4.35615	0.38	0.173055	16	8.39	1.43874	42	TRUE	FALSE	FALSE	0.147
112.724	38.2987	山西省	忻州	9.5	445	217	3	4.36	0.38	0.1731	16	8.39	1.44	42	TRUE	FALSE	FALSE	0.612
112.73	38.3045	山西省	忻州	9.25	450	217	3	4.36	0.38	0.21	16	8.39	1.4	44	TRUE	FALSE	FALSE	0.612
112.73	38.3045	山西省	忻州	9.25	450	0	3	4.35615	0.38	0.21	16	8.39	1.40416	44	TRUE	FALSE	FALSE	0.147
113.2	38.4833	山西省	忻州	9	466.5	217	3	4.3	0.4	0.253	14	8.4	1.53	198	TRUE	FALSE	FALSE	0.39
113.2	38.4833	山西省	忻州	9	466.5	217	3	4.3	0.4	0.253	14	8.4	1.53	198	TRUE	FALSE	FALSE	0.86
113.2	38.4833	山西省	忻州	9	466.5	432	3	4.3	0.4	0.253	14	8.4	1.53	198	TRUE	FALSE	FALSE	1.31
114.34	23.06	广东省	惠州	22	1770	217.2	3	18.0974	1.87	0.46	9	7	1.40756	75.3989	FALSE	TRUE	FALSE	1.13
113.25	23.1333	广东省	广州	21.9	1696	300	3	10.14	0.77	0.21	16	6.63	1.36	109	TRUE	FALSE	FALSE	0.85
113.25	23.1333	广东省	广州	21.9	1696	300	3	10.14	0.77	0.21	16	6.63	1.36	109	TRUE	FALSE	FALSE	1.45
113.25	23.1333	广东省	广州	21.9	1696	360	3	10.1392	0.77	0.21	16	6.63	1.36	108.944	TRUE	FALSE	FALSE	0.46
113.343	23.1478	广东省	广州	22.5	1517	360	3	20.5	1.29	0.20871	16	4.88	1.36	85.168	TRUE	FALSE	FALSE	36.22
113.343	23.1478	广东省	广州	22.5	1517	0	3	20.5	1.29	0.20871	16	4.88	1.36	85.168	TRUE	FALSE	FALSE	0.77
113.358	23.1608	广东省	广州	21	1701	180	3	15.6671	0.89	0.214	6	5.7	1.4	82.5048	FALSE	TRUE	FALSE	8.65
114.6	23.3167	广东省	惠州	22.25	1600	217.2	3	18.1	1.87	0.0968	6	7	1.4	79.4553	FALSE	TRUE	FALSE	2.63
114.6	23.3167	广东省	惠州	22.25	1600	217.2	3	18.1	1.87	0.0968	6	7	1.4	79.4553	FALSE	TRUE	FALSE	2.97
114.6	23.3167	广东省	惠州	22.25	1600	217.2	3	18.1	1.87	0.0968	6	7	1.4	79.4553	FALSE	TRUE	FALSE	6.6
120.8	31.2	江苏省	苏州	16	1139	125	4	20.26	1.81	0.21	11	5.6	1.25	134	FALSE	FALSE	TRUE	1.59
120.8	31.2	江苏省	苏州	16	1139	150	4	20.26	1.81	0.21	11	5.6	1.25	133.612	FALSE	FALSE	TRUE	2.93
120.8	31.2	江苏省	苏州	16	1139	0	4	20.26	1.82	0.21	11	5.3	1.25	133.612	FALSE	TRUE	FALSE	0.05
120.8	31.2	江苏省	苏州	16	1139	0	4	20.26	1.81	0.21	11	5.6	1.25	133.612	FALSE	FALSE	TRUE	0.26
120.8	31.2	江苏省	苏州	16	1139	0	4	20.26	1.81	0.132	11	5.6	1.25	133.612	FALSE	FALSE	TRUE	0.26
119.9	31.2667	江苏省	无锡	15.7	1177	225	3	5.8	1.56	0.08	7	6.25	1.27	157.512	FALSE	TRUE	FALSE	0.175
119.9	31.2667	江苏省	无锡	15.7	1177	240	3	14.5	1.56	0.213	12.3	6.25	1.27	157.512	FALSE	TRUE	FALSE	0.92
120.633	31.2667	江苏省	苏州	15	1086	0	3	21.5	2.23	0.299	11	6.6	1.22	245.79	FALSE	TRUE	FALSE	6
119.906	31.281	江苏省	无锡	16	1250	180	3	13.1671	1.56	0.17479	7	6.25	1.37208	164.874	FALSE	FALSE	TRUE	5.78
119.906	31.281	江苏省	无锡	16	1250	0	3	13.1671	1.56	0.17479	7	6.25	1.37208	164.874	FALSE	FALSE	TRUE	0.85
119.683	31.4	江苏省	无锡	15.7	1177	300	3	23.5	1.8	0.39	11	6.5	1.01	226.484	FALSE	TRUE	FALSE	4.5
119.683	31.4	江苏省	无锡	15.7	1177	0	3	24	1.8	0.39	11	6.5	1.01	226.484	FALSE	TRUE	FALSE	0.76
119.683	31.4	江苏省	无锡	15.7	1177	300	3	23.5	1.8	0.39	18.1	6.5	1.01	227	FALSE	TRUE	FALSE	1.95
119.683	31.4	江苏省	无锡	15.7	1177	300	3	26.83	1.48	0.132	18.1	5.94	1.01	226	FALSE	TRUE	FALSE	7.4
119.683	31.4	江苏省	无锡	15.7	1177	300	3	23.5	1.8	0.39	18.1	6.5	1.01	227	FALSE	FALSE	TRUE	8.86
119.683	31.4	江苏省	无锡	15.7	1177	300	3	25.2	2.21	0.132	18.1	5.7	1.01	226	FALSE	FALSE	TRUE	10.5
120.417	31.4	江苏省	苏州	16	1139	225	4	11.4	0.51	0.21	11	5.95	1.2	175	FALSE	FALSE	TRUE	4.06
120.417	31.4	江苏省	苏州	16	1139	262.5	4	11.4	0.51	0.21	11	5.95	1.2	175.207	FALSE	FALSE	TRUE	5.4
120.417	31.4	江苏省	苏州	16	1139	0	4	11.4	0.51	0.21	11	5.95	1.2	175.207	FALSE	FALSE	TRUE	0.54
120.55	31.5	江苏省	苏州	18	1063	240	4	16.79	1.79	0.186	11	7.71	1.03	297.096	FALSE	FALSE	TRUE	2.26
120.55	31.5	江苏省	苏州	18	1063	240	4	16.79	1.79	0.186	11	7.71	1.03	297.096	FALSE	FALSE	TRUE	4.95
120.55	31.5	江苏省	苏州	18	1063	0	4	16.79	1.79	0.186	11	7.71	1.03	297.096	FALSE	FALSE	TRUE	0.34
120.55	31.5	江苏省	苏州	18	1063	0	4	16.79	1.79	0.186	11	7.71	1.03	297.096	FALSE	FALSE	TRUE	0.98
121.102	31.5289	江苏省	苏州	15	1106	240	3	8	1.59	0.186	23	8.1	1.28	246.386	FALSE	FALSE	TRUE	8.6
120.68	31.53	江苏省	苏州	15	1100	0	3	20.3	2.1	0.379278	10	7.4	1.1	342.158	FALSE	TRUE	FALSE	0.04
120.683	31.5333	江苏省	苏州	15	1090	180	3	20.1	2	0.299	10	7.7	1.2	342.16	FALSE	FALSE	TRUE	2.09
120.683	31.5333	江苏省	苏州	15	1090	240	3	20.1	2	0.299	10	7.7	1.2	342.16	FALSE	TRUE	FALSE	0.24
120.917	31.5333	江苏省	苏州	15	1103	240	3	11.6	2.3	0.331	10	7.6	1.2	280.183	FALSE	TRUE	FALSE	0.55
120.917	31.5333	江苏省	苏州	15	1103	0	3	11.6	2.3	0.331	10	7.6	1.2	280.183	FALSE	TRUE	FALSE	0.26
120.917	31.5333	江苏省	苏州	15	1103	0	3	11.6	2.3	0.331	10	7.6	1.2	280.183	FALSE	FALSE	TRUE	1.16
120.117	31.5424	江苏省	无锡	15	1123	153	3	20.68	1.81	0.2103	11	7.8	1.41	210	FALSE	TRUE	FALSE	1.9
120.117	31.5424	江苏省	无锡	15	1123	270	3	20.68	1.81	0.210332	11	7.80392	1.41	209.944	FALSE	TRUE	FALSE	2.8
120.117	31.5424	江苏省	无锡	15	1123	0	3	20.68	1.81	0.210332	11	7.80392	1.41	209.944	FALSE	TRUE	FALSE	0.8
120.699	31.5458	江苏省	苏州	17.8	1038	530	3	10.5	1.1	0.299	10	4.7	1.27	341.105	FALSE	TRUE	FALSE	1.05
120.617	31.55	江苏省	苏州	15.5	1042	210	3	18.7935	1.7	0.331	10	6.3	1.2	367.42	FALSE	FALSE	TRUE	2.55
120.7	31.55	江苏省	苏州	15.5	1038	240	3	22.1578	2.17	0.331	10	7.6	1.27	345.99	FALSE	TRUE	FALSE	0.23
120.717	31.55	江苏省	苏州	16.6	1178	180	3	11.3	1.96	0.5	10	7.9	1.2	339.005	FALSE	TRUE	FALSE	0.23
120.717	31.55	江苏省	苏州	16.6	1178	0	3	11.3	1.96	0.5	10	7.9	1.2	339.005	FALSE	TRUE	FALSE	0.18
120.708	31.5592	江苏省	苏州	15	1088	135	4	20.3	2.1	0.2883	10	7.35	1.26	347	FALSE	FALSE	TRUE	1.17
120.708	31.5592	江苏省	苏州	15	1088	135	4	20.3	2.1	0.2883	10	7.35	1.26	347	FALSE	FALSE	TRUE	7.7
120.708	31.5592	江苏省	苏州	15	1088	162	4	20.3	2.1	0.2883	10	7.35	1.26	347	FALSE	FALSE	TRUE	1.29
120.708	31.5592	江苏省	苏州	15	1088	162	4	20.3	2.1	0.2883	10	7.35	1.26	347	FALSE	FALSE	TRUE	6.55
120.708	31.5592	江苏省	苏州	15	1088	180	4	20.3	2.1	0.28834	10	7.35	1.26242	347.079	FALSE	FALSE	TRUE	7.11
120.708	31.5592	江苏省	苏州	15	1088	225	4	20.3	2.1	0.2883	10	7.35	1.26	347	FALSE	TRUE	FALSE	0.25
120.708	31.5592	江苏省	苏州	15	1088	225	4	20.3	2.1	0.2883	10	7.35	1.26	347	FALSE	TRUE	FALSE	0.56
120.708	31.5592	江苏省	苏州	15	1088	270	4	20.3	2.1	0.2883	10	7.35	1.26	347	FALSE	TRUE	FALSE	0.28
120.708	31.5592	江苏省	苏州	15	1088	270	4	20.3	2.1	0.2883	10	7.35	1.26	347	FALSE	TRUE	FALSE	0.66
120.708	31.5592	江苏省	苏州	15	1088	300	4	20.3	2.1	0.28834	10	7.35	1.26242	347.079	FALSE	TRUE	FALSE	0.61
120.708	31.5592	江苏省	苏州	15	1088	0	4	20.3	2.1	0.28834	10	7.35	1.26242	347.079	FALSE	TRUE	FALSE	0.11
120.708	31.5592	江苏省	苏州	15	1088	0	4	20.3	2.1	0.28834	10	7.35	1.26242	347.079	FALSE	TRUE	FALSE	0.48
120.708	31.5592	江苏省	苏州	15	1088	0	3	20.3	2.1	0.28834	10	7.35	1.11	347.079	FALSE	FALSE	TRUE	0.57
120.708	31.5592	江苏省	苏州	15	1088	0	4	20.3	2.1	0.28834	10	7.35	1.26242	347.079	FALSE	FALSE	TRUE	0.58
120.708	31.5592	江苏省	苏州	15	1088	0	4	20.3	2.1	0.28834	10	7.35	1.26242	347.079	FALSE	FALSE	TRUE	0.95
120.367	31.6167	江苏省	无锡	15	1093	300	3	12.6	1.3	0.245	11	6.23	1.41	276.593	FALSE	TRUE	FALSE	5.19
120.467	31.6167	江苏省	无锡	16	1080	180	3	15	1.59	0.31	11	6.8	1.2	329.386	FALSE	FALSE	TRUE	2.33
120.467	31.6167	江苏省	无锡	16	1080	250	3	15	1.59	0.31	11	6.8	1.2	329.386	FALSE	TRUE	FALSE	1.47
120.467	31.6167	江苏省	无锡	16	1080	0	3	15	1.59	0.31	11	6.8	1.2	329.386	FALSE	TRUE	FALSE	0.43
120.467	31.6167	江苏省	无锡	16	1080	0	3	15	1.59	0.31	11	6.8	1.2	329.386	FALSE	FALSE	TRUE	0.96
120.633	31.6167	江苏省	苏州	15	1086	0	3	15	1.59	0.31	10	6.8	1.2	418.055	FALSE	TRUE	FALSE	0.8
119.967	31.6333	江苏省	常州	15.1	1018	150	3	11.2	1.18	0.36	11	6.3	1.1	246.286	FALSE	TRUE	FALSE	1.3
119.967	31.6333	江苏省	常州	15.1	1018	150	3	11.2	1.18	0.36	11	6.3	1.1	246.286	FALSE	TRUE	FALSE	4
119.967	31.6333	江苏省	常州	15.1	1018	0	3	11.2	1.18	0.36	11	6.3	1.1	246.286	FALSE	TRUE	FALSE	0.1
119.967	31.6333	江苏省	常州	15.1	1018	0	3	11.2	1.18	0.36	11	6.3	1.1	246.286	FALSE	TRUE	FALSE	0.3
118.833	31.8667	江苏省	南京	15	1079	211	2	10.1	1.26	0.272253	23	7.90206	1.36507	216.353	FALSE	TRUE	FALSE	6.5
118.833	31.8667	江苏省	南京	15	1079	211	2	10.1	1.26	0.272253	23	7.90206	1.36507	216.353	FALSE	FALSE	TRUE	19.89
118.983	31.95	江苏省	南京	15	1100	150	3	21.09	1.65	0.27	27	7.94	1.18	199.06	FALSE	FALSE	TRUE	1.89
118.983	31.95	江苏省	南京	15	1100	190	3	21.09	1.65	0.27	27	7.94	1.18	199.06	FALSE	TRUE	FALSE	0.25
118.983	31.95	江苏省	南京	15	1076	200	3	12.23	1.65	0.27	27	7.94	1.18	199	FALSE	FALSE	TRUE	1.93
118.983	31.95	江苏省	南京	15	1100	200	3	21.09	1.65	0.27	27	7.94	1.18	199.06	FALSE	FALSE	TRUE	1.93
118.983	31.95	江苏省	南京	15	1076	230	3	12.23	1.65	0.27	27	7.94	1.18	199	FALSE	TRUE	FALSE	0.18
118.983	31.95	江苏省	南京	15	1100	230	3	21.09	1.65	0.27	27	7.94	1.18	199.06	FALSE	TRUE	FALSE	0.18
118.983	31.95	江苏省	南京	15	1076	230	3	12.2332	1.65	0.27	27	7.94	1.18	199.06	FALSE	FALSE	TRUE	2.5
118.983	31.95	江苏省	南京	15	1076	0	3	12.2332	1.65	0.27	27	7.94	1.18	199.06	FALSE	TRUE	FALSE	0.14
118.983	31.95	江苏省	南京	15	1076	0	3	12.2332	1.65	0.27	27	7.94	1.18	199.06	FALSE	FALSE	TRUE	0.43
118.8	31.9667	江苏省	南京	15.7	1050	250	3	14.7	1.32	0.2	31.2	5.7	1.46477	182.258	FALSE	TRUE	FALSE	3.91
118.8	31.9667	江苏省	南京	15.7	1050	250	3	14.7	1.32	0.2	31.2	5.7	1.46477	182.258	FALSE	FALSE	TRUE	4.45
118.8	31.9667	江苏省	南京	15.7	1050	0	3	14.7	1.32	0.2	31.2	5.7	1.46477	182.258	FALSE	TRUE	FALSE	0.66
118.8	31.9667	江苏省	南京	15.7	1050	0	3	14.7	1.32	0.2	31.2	5.7	1.46477	182.258	FALSE	FALSE	TRUE	0.68
119.3	31.9667	江苏省	镇江	15	1072	240	3	18.9	1.2	0.0400905	1	5.90101	1.40001	194.695	FALSE	TRUE	FALSE	3.44
119.3	31.9667	江苏省	镇江	15	1072	0	3	18.9	1.2	0.0400905	1	5.90101	1.40001	194.695	FALSE	TRUE	FALSE	0.07
119.3	31.9667	江苏省	镇江	15.1	1019	240	3	11.5	1.3	0.142	1	6.9	1.23	194.695	FALSE	TRUE	FALSE	1.08
119.3	31.9667	江苏省	镇江	15	1072	240	3	11	1.7	0.14	1	6.91	1.4	194.695	FALSE	TRUE	FALSE	3.28
119.3	31.9667	江苏省	镇江	15.1	1150	240	3	18.9	1.2	0.14	1	6.91	1.4	194.695	FALSE	TRUE	FALSE	4.509
119.3	31.9667	江苏省	镇江	15	1072	240	3	11	1.7	0.14	1	6.91	1.4	194.695	FALSE	TRUE	FALSE	4.52
119.3	31.9667	江苏省	镇江	15	1072	240	3	11	1.7	0.14	1	6.91	1.4	194.695	FALSE	TRUE	FALSE	5.34
119.3	31.9667	江苏省	镇江	15	1072	240	3	11	1.7	0.14	1	6.91	1.4	194.695	FALSE	TRUE	FALSE	8.57
119.3	31.9667	江苏省	镇江	15	1072	240	3	11	1.7	0.14	1	6.91	1.4	194.695	FALSE	TRUE	FALSE	18.99
119.3	31.9667	江苏省	镇江	15.1	1150	0	3	18.9	1.2	0.14	1	6.91	1.4	194.695	FALSE	TRUE	FALSE	0.962
119.3	31.9667	江苏省	镇江	15	1072	0	3	11	1.7	0.14	1	6.91	1.4	194.695	FALSE	TRUE	FALSE	0.97
119.3	31.9667	江苏省	镇江	15	1072	0	3	11	1.7	0.14	1	6.91	1.4	194.695	FALSE	TRUE	FALSE	1
119.3	31.9667	江苏省	镇江	15	1072	0	3	11	1.7	0.14	1	6.91	1.4	194.695	FALSE	TRUE	FALSE	1.55
119.3	31.9667	江苏省	镇江	15	1072	0	3	11	1.7	0.14	1	6.91	1.4	194.695	FALSE	TRUE	FALSE	2.12
119.3	31.9667	江苏省	镇江	15	1072	0	3	11	1.7	0.14	1	6.91	1.4	194.695	FALSE	TRUE	FALSE	4.18
118.8	31.9667	江苏省	南京	15.7	1100	250	9	14.6752	1.32	0.206836	11	5.7	1.28	182.258	FALSE	TRUE	FALSE	8.731
118.8	31.9667	江苏省	南京	15.7	1100	0	9	14.6752	1.32	0.206836	11	5.7	1.28	182.258	FALSE	TRUE	FALSE	0.893
119.3	31.9667	江苏省	镇江	15.1	1018.6	200	3	11	1.7	0.14	1	5.9	1.4	195	FALSE	FALSE	TRUE	13.92
119.3	31.9667	江苏省	镇江	15	1072	270	3	17.4	1.1	0.0400905	1	5.90101	1.40001	194.695	FALSE	FALSE	TRUE	2.1716
119.3	31.9667	江苏省	镇江	15.1	1018.6	270	3	11	1.7	0.14	1	5.90101	1.40001	194.695	FALSE	FALSE	TRUE	21.75
119.3	31.9667	江苏省	镇江	15	1072	300	3	8.2	1.1	0.0400905	1	5.9	1.40001	194.695	FALSE	TRUE	FALSE	15.1034
119.3	31.9667	江苏省	镇江	15	1072	0	3	17.4	1.1	0.0400905	1	5.90101	1.40001	194.695	FALSE	FALSE	TRUE	0.3547
119.3	31.9667	江苏省	镇江	15	1072	0	3	8.2	1.1	0.0400905	1	5.9	1.40001	194.695	FALSE	TRUE	FALSE	2.1724
119.3	31.9667	江苏省	镇江	15.1	1018.6	0	3	11	1.7	0.14	1	5.90101	1.40001	194.695	FALSE	FALSE	TRUE	3.52
118.8	32	江苏省	南京	15.6	1100	200	3	9.68677	1.1	0.549	20	6.1	1.27328	170.571	TRUE	FALSE	FALSE	6.52
118.8	32	江苏省	南京	15	1044	300	3	13.1	1.1	0.51	20	6.7	1.15	170.571	TRUE	FALSE	FALSE	2.82
118.8	32	江苏省	南京	15.6	1100	300	3	9.68677	1.1	0.549	20	6.1	1.27328	170.571	FALSE	TRUE	FALSE	7.74
118.8	32	江苏省	南京	15	1044	0	3	13.1	1.1	0.51	20	6.7	1.15	170.571	FALSE	FALSE	TRUE	0.14
118.8	32	江苏省	南京	15	1044	0	3	13.1	1.1	0.51	20	6.7	1.15	170.571	TRUE	FALSE	FALSE	0.52
118.8	32	江苏省	南京	15	1044	0	3	13.1	1.1	0.51	20	6.7	1.15	170.571	TRUE	FALSE	FALSE	0.52
118.8	32	江苏省	南京	15.6	1100	0	3	9.68677	1.1	0.549	20	6.1	1.27328	170.571	FALSE	TRUE	FALSE	2.6
118.8	32	江苏省	南京	15.6	1100	0	3	9.68677	1.1	0.549	20	6.1	1.27328	170.571	TRUE	FALSE	FALSE	3.93
119.085	32.0004	江苏省	南京	14	1074	240	3	16.87	1.95	0.3934	11	5.93	1.47	182.117	TRUE	FALSE	FALSE	4.02
119.2	32.1	江苏省	镇江	15	1200	200	3	18.36	2.11	0.1	6	6.1	1.23	160.505	FALSE	FALSE	TRUE	3.63
119.2	32.1	江苏省	镇江	15	1200	270	3	18.36	2.11	0.1	6	6.1	1.23	160.505	FALSE	TRUE	FALSE	4.96
119.2	32.1	江苏省	镇江	15.7	724.3	300	3	10.65	2.11	0.1	6	6.1	1.23	160.505	TRUE	FALSE	FALSE	11.63
119.2	32.1	江苏省	镇江	15	1200	0	3	18.36	2.11	0.1	6	6.1	1.23	160.505	FALSE	TRUE	FALSE	0.72
119.2	32.1	江苏省	镇江	15	1200	0	3	18.36	2.11	0.1	6	6.1	1.23	160.505	FALSE	FALSE	TRUE	1.3
118.6	32.4833	江苏省	南京	15.3	1100	225	3	7.01856	0.91	0.199044	11	6.4	1.48	188.608	FALSE	FALSE	TRUE	0.77404
118.6	32.4833	江苏省	南京	15.3	970	225	3	7.01856	0.91	0.199044	11	6.4	1.48	188.608	FALSE	FALSE	TRUE	1.21635
119.7	32.5833	江苏省	扬州	14	1033	0	3	18.4	1.46	0.14	11	8	1.16	297.4	FALSE	TRUE	FALSE	0.9
119.267	32.5833	江苏省	扬州	14	1055	300	3	12	1.5	0.14	11	6.91	1.41	167.521	FALSE	TRUE	FALSE	3.9
119.7	32.5847	江苏省	扬州	15.9	924	0	4	18.4	1.45	0.136	11	8	1.16	297.4	FALSE	FALSE	TRUE	0.88
119.7	32.5847	江苏省	扬州	15.9	924	150	3	18.4	1.45	0.14	11	8	1.41	297.4	FALSE	TRUE	FALSE	0.65
119.7	32.5847	江苏省	扬州	15.9	924	150	3	18.4	1.45	0.14	11	8	1.41	297.4	FALSE	TRUE	FALSE	1
119.7	32.5847	江苏省	扬州	15.9	924	150	3	18.4	1.45	0.14	11	8	1.41	297.4	FALSE	TRUE	FALSE	1.16
119.7	32.5847	江苏省	扬州	15.9	924	150	3	18.4	1.45	0.14	11	8	1.41	297.4	FALSE	FALSE	TRUE	1.18
119.7	32.5847	江苏省	扬州	15.9	924	150	3	18.4	1.45	0.14	11	8	1.41	297.4	FALSE	FALSE	TRUE	1.56
119.7	32.5847	江苏省	扬州	15.9	924	150	3	18.4	1.45	0.14	11	8	1.41	297.4	FALSE	TRUE	FALSE	1.83
119.7	32.5847	江苏省	扬州	15.9	924	150	3	18.4	1.45	0.14	11	8	1.41	297.4	FALSE	FALSE	TRUE	2.06
119.7	32.5847	江苏省	扬州	15.9	924	150	3	18.4	1.45	0.14	11	8	1.41	297.4	FALSE	FALSE	TRUE	3.16
119.7	32.5847	江苏省	扬州	15.9	924	225	3	18.4	1.45	0.14	11	8	1.41	297.4	FALSE	FALSE	TRUE	2.57
119.7	32.919	江苏省	扬州	14	1021	0	3	14.5012	2.4	0.221	23	7.5	1.28	178.101	TRUE	FALSE	FALSE	0.52
120.033	33.55	江苏省	盐城	14.1	950	270	3	2.91	0.32	0.13	11	8.7	1.41	207.766	TRUE	FALSE	FALSE	1.78
120.033	33.55	江苏省	盐城	14.1	950	0	3	2.91	0.32	0.13	11	8.7	1.41	207.766	TRUE	FALSE	FALSE	0.17
116.333	28.25	江西省	南昌	17.7	1400	300	3	17.7	1.59	0.391	11	4.89	1.24	129.276	FALSE	TRUE	FALSE	1.47
115.126	28.2572	江西省	宜春	17.2	1680	195	4	13.7007	1.69	0.169	11	5.28	1.41	96.2355	FALSE	TRUE	FALSE	5.27
114.317	28.3167	江西省	宜春	12	1711	240	3	8.46868	1	0.23	12	5.8	1.19061	31.9037	TRUE	FALSE	FALSE	2.054
114.317	28.3167	江西省	宜春	12	1711	0	3	8.46868	1	0.23	12	5.8	1.19061	31.9037	TRUE	FALSE	FALSE	0.3769
114.317	28.3167	江西省	宜春	22.4	898.8	240	3	8.46868	1	0.23	12	5.8	1.19061	31.9037	TRUE	FALSE	FALSE	1.49
114.317	28.3167	江西省	宜春	22.4	898.8	240	3	8.46868	1	0.23	12	5.8	1.19061	31.9037	TRUE	FALSE	FALSE	2.058
114.317	28.3167	江西省	宜春	22.4	898.8	240	3	8.46868	1	0.23	12	5.8	1.19061	31.9037	TRUE	FALSE	FALSE	2.459
115.15	28.5167	江西省	宜春	17.5	1650	165	3	27.9002	2.85	0.48	10	5.6	1.24958	90.9851	FALSE	TRUE	FALSE	2.585
115.15	28.5167	江西省	宜春	17.5	1650	180	3	27.9002	2.85	0.48	10	5.6	1.24958	90.9851	FALSE	TRUE	FALSE	6.277
115.15	28.5167	江西省	宜春	17.5	1650	0	3	27.9002	2.85	0.48	10	5.6	1.24958	90.9851	FALSE	TRUE	FALSE	2.308
115.15	28.5167	江西省	宜春	17.5	1650	0	3	27.9002	2.85	0.48	10	5.6	1.24958	90.9851	FALSE	TRUE	FALSE	3.323
116.433	28.6167	江西省	南昌	17.7	1549	60	3	9.39	0.98	0.21	10	6	1.25	167.209	TRUE	FALSE	FALSE	0.47
116.433	28.6167	江西省	南昌	17.7	1549	60	3	9.39	0.98	0.21	10	6	1.25	167.209	TRUE	FALSE	FALSE	0.49
116.433	28.6167	江西省	南昌	17.7	1549	60	3	9.39	0.98	0.21	10	6	1.25	167.209	TRUE	FALSE	FALSE	0.68
116.433	28.6167	江西省	南昌	17.7	1549	60	3	9.39	0.98	0.21	10	6	1.25	167.209	TRUE	FALSE	FALSE	0.7
116.433	28.6167	江西省	南昌	17.7	1549	0	3	9.39	0.98	0.21	10	6	1.25	167.209	TRUE	FALSE	FALSE	0.3
116.433	28.6167	江西省	南昌	17.7	1549	0	3	9.39	0.98	0.21	10	6	1.25	167.209	TRUE	FALSE	FALSE	0.33
116.433	28.6167	江西省	南昌	17.7	1549	0	3	9.39	0.98	0.21	10	6	1.25	167.209	TRUE	FALSE	FALSE	0.45
116.433	28.6167	江西省	南昌	17.7	1549	0	3	9.39	0.98	0.21	10	6	1.25	167.209	TRUE	FALSE	FALSE	0.47
114.986	36.7766	河北省	邯郸	13	503	240	3	7.25058	0.85	0.27	28	8.3	1.27	184.145	TRUE	FALSE	FALSE	4.212
114.986	36.7766	河北省	邯郸	13	503	250	3	7.42459	0.83	0.27	28	8.5	1.23	184.145	TRUE	FALSE	FALSE	0.395
115.167	36.8667	河北省	邯郸	13.1	556.2	180	3	8.52668	0.9	0.18	14	8.24	1.34	117.452	TRUE	FALSE	FALSE	1.179
115.167	36.8667	河北省	邯郸	13.1	556.2	180	3	8.52668	0.9	0.18	14	8.24	1.34	117.452	TRUE	FALSE	FALSE	1.887
115.167	36.8667	河北省	邯郸	13.1	556.2	185	3	8.53	0.9	0.18	14	8.24	1.35	117	TRUE	FALSE	FALSE	1.68
115.167	36.8667	河北省	邯郸	13.1	556.2	200	3	8.52668	0.9	0.18	14	8.24	1.34	117.452	FALSE	FALSE	TRUE	0.493
115.167	36.8667	河北省	邯郸	13.1	556.2	200	3	8.52668	0.9	0.18	14	8.24	1.34	117.452	FALSE	FALSE	TRUE	0.762
115.167	36.8667	河北省	邯郸	13.1	556.2	300	3	8.52668	0.9	0.18	14	8.24	1.35	117.452	TRUE	FALSE	FALSE	3.46218
115.167	36.8667	河北省	邯郸	13.1	556.2	0	3	8.52668	0.9	0.18	14	8.24	1.34	117.452	FALSE	FALSE	TRUE	0.198
115.167	36.8667	河北省	邯郸	13.1	556.2	0	3	8.52668	0.9	0.18	14	8.24	1.34	117.452	FALSE	FALSE	TRUE	0.235
115.167	36.8667	河北省	邯郸	13.1	556.2	0	3	8.52668	0.9	0.18	14	8.24	1.34	117.452	TRUE	FALSE	FALSE	0.352
115.167	36.8667	河北省	邯郸	13.1	556.2	0	3	8.52668	0.9	0.18	14	8.24	1.34	117.452	TRUE	FALSE	FALSE	0.599
115.02	36.87	河北省	邯郸	13.2	556	180	3	7.13	0.8	0.097	10	8.2	1.36	167	TRUE	FALSE	FALSE	0.46
115.02	36.87	河北省	邯郸	13.2	556	180	3	7.13	0.8	0.097	10	8.2	1.36	167	TRUE	FALSE	FALSE	0.71
115.02	36.87	河北省	邯郸	13.2	556	180	3	7.13	0.8	0.097	10	8.2	1.36	167	FALSE	FALSE	TRUE	0.73
115.02	36.87	河北省	邯郸	13.2	556	180	3	7.13	0.8	0.097	10	8.2	1.36	167	FALSE	FALSE	TRUE	0.82
115.02	36.87	河北省	邯郸	13.2	494	250	4	7.30858	0.7	0.158496	10	7.72	1.37	167.479	TRUE	FALSE	FALSE	1.67
115.02	36.87	河北省	邯郸	13.2	494	250	4	7.30858	0.7	0.158496	10	7.72	1.37	167.479	TRUE	FALSE	FALSE	1.76
115.02	36.87	河北省	邯郸	13.2	494	300	4	7.30858	0.7	0.158496	10	7.72	1.37	167.479	FALSE	FALSE	TRUE	1.42
115.123	37.6142	河北省	邢台	12	470	285	3	12.065	1.18	0.128	14	8.37	1.39	302.714	FALSE	FALSE	TRUE	4.39
114.683	37.8833	河北省	石家庄	12.2	536.8	270	4	9.57077	0.9	0.09	6	6.5	1.44	365.896	FALSE	FALSE	TRUE	1.57
114.67	37.89	河北省	石家庄	13	537	300	3	6.96056	0.9	0.09	6	8.5	1.4	363.02	TRUE	FALSE	FALSE	1.59
114.67	37.89	河北省	石家庄	13	537	300	3	6.96056	0.9	0.09	6	8.5	1.4	363.02	FALSE	FALSE	TRUE	1.81
114.67	37.89	河北省	石家庄	13	537	0	3	6.96056	0.9	0.09	6	8.5	1.4	363.02	TRUE	FALSE	FALSE	0.58
114.67	37.89	河北省	石家庄	13	537	0	3	6.96056	0.9	0.09	6	8.5	1.4	363.02	FALSE	FALSE	TRUE	0.78
115.32	38.01	河北省	石家庄	12.6	459.7	168	3	6.79	0.75	0.1951	14	8.6	1.4	265	TRUE	FALSE	FALSE	2.61
115.32	38.01	河北省	石家庄	12.6	459.7	210	3	6.79	0.75	0.1951	14	8.6	1.4	265	FALSE	FALSE	TRUE	1.4
115.32	38.01	河北省	石家庄	12.6	459.7	240	3	6.78654	0.75	0.19514	14	8.6	1.4	264.974	TRUE	FALSE	FALSE	3.16
115.32	38.01	河北省	石家庄	12.6	459.7	0	3	6.78654	0.75	0.19514	14	8.6	1.4	264.974	FALSE	FALSE	TRUE	0.67
115.32	38.01	河北省	石家庄	12.6	459.7	0	3	6.78654	0.75	0.19514	14	8.6	1.4	264.974	TRUE	FALSE	FALSE	0.86
115.067	38.1333	河北省	石家庄	12.3	575	120	3	11.1949	1	0.153	6	8.6	1.44	348.36	TRUE	FALSE	FALSE	0.738
115.067	38.1333	河北省	石家庄	12.3	575	150	3	11.1949	1	0.153	6	8.6	1.44	348.36	FALSE	FALSE	TRUE	0.162
115.067	38.1333	河北省	石家庄	12.3	575	240	3	11.1949	1	0.153	6	8.6	1.44	348.362	TRUE	FALSE	FALSE	1.101
115.067	38.1333	河北省	石家庄	12.3	575	300	3	11.1949	1	0.153	6	8.6	1.44	348.362	FALSE	FALSE	TRUE	0.235
116.883	38.3	河北省	沧州	14.4	855	240	3	6.4	0.7	0.128	14	8	1.39	194	FALSE	FALSE	TRUE	0.47
116.883	38.3	河北省	沧州	14.4	855	0	3	6.4	0.7	0.128	14	8	1.39	194	FALSE	FALSE	TRUE	0.36
115.413	38.81	河北省	保定	12	550	225	3	6.99	0.6	0.153	6	8.7	1.4	222	FALSE	FALSE	TRUE	1.057
115.413	38.81	河北省	保定	12	550	225	3	6.99	0.6	0.153	6	8.7	1.4	222	FALSE	FALSE	TRUE	1.524
115.413	38.81	河北省	保定	12	550	225	3	7.83	0.87	0.153	6	8.3	1.4	222	FALSE	FALSE	TRUE	1.67
115.413	38.81	河北省	保定	12	550	225	3	7.83	0.87	0.153	6	8.3	1.4	222	FALSE	FALSE	TRUE	2.08
115.413	38.81	河北省	保定	12	550	285	3	6.98956	0.6	0.153	6	8.7	1.4	221.561	FALSE	FALSE	TRUE	1.822
115.413	38.81	河北省	保定	12	550	285	3	7.83063	0.87	0.153	6	8.3	1.4	221.561	FALSE	FALSE	TRUE	3.2
115.413	38.81	河北省	保定	12	550	300	3	7.83	0.87	0.153	6	8.3	1.4	222	TRUE	FALSE	FALSE	2.17
115.413	38.81	河北省	保定	12	550	300	3	7.83	0.87	0.153	6	8.3	1.4	222	TRUE	FALSE	FALSE	2.25
115.413	38.81	河北省	保定	12	550	300	3	6.99	0.6	0.153	6	8.7	1.4	222	TRUE	FALSE	FALSE	2.481
115.413	38.81	河北省	保定	12	550	300	3	6.99	0.6	0.153	6	8.7	1.4	222	TRUE	FALSE	FALSE	4.913
115.413	38.81	河北省	保定	12	550	391.5	3	6.98956	0.6	0.153	6	8.7	1.4	221.561	TRUE	FALSE	FALSE	3.31
115.413	38.81	河北省	保定	12	550	391.5	3	6.98956	0.6	0.153	6	8.7	1.4	221.561	TRUE	FALSE	FALSE	6.919
115.413	38.81	河北省	保定	12	550	392	3	7.83063	0.87	0.153	6	8.3	1.4	221.561	TRUE	FALSE	FALSE	3.82
115.413	38.81	河北省	保定	12	550	0	3	7.83063	0.87	0.153	6	8.3	1.4	221.561	FALSE	FALSE	TRUE	0.34
115.413	38.81	河北省	保定	12	550	0	3	7.83063	0.87	0.153	6	8.3	1.4	221.561	TRUE	FALSE	FALSE	0.5
115.413	38.81	河北省	保定	12	550	0	3	6.98956	0.6	0.153	6	8.7	1.4	221.561	FALSE	FALSE	TRUE	0.511
115.413	38.81	河北省	保定	12	550	0	3	7.83063	0.87	0.153	6	8.3	1.4	221.561	TRUE	FALSE	FALSE	0.53
115.413	38.81	河北省	保定	12	550	0	3	7.83063	0.87	0.153	6	8.3	1.4	221.561	FALSE	FALSE	TRUE	0.56
115.413	38.81	河北省	保定	12	550	0	3	6.98956	0.6	0.153	6	8.7	1.4	221.561	FALSE	FALSE	TRUE	0.565
115.413	38.81	河北省	保定	12	550	0	3	6.98956	0.6	0.153	6	8.7	1.4	221.561	TRUE	FALSE	FALSE	0.732
115.413	38.81	河北省	保定	12	550	0	3	6.98956	0.6	0.153	6	8.7	1.4	221.561	TRUE	FALSE	FALSE	0.903
115.401	38.8148	河北省	保定	12	550	300	3	9.57077	0.92	0.09	6	8.4	1.44	222.363	TRUE	FALSE	FALSE	4.07012
115.401	38.8148	河北省	保定	12	550	0	3	9.57077	0.92	0.09	6	8.4	1.44	222.363	TRUE	FALSE	FALSE	1.18379
115.433	38.8167	河北省	保定	13	500	285	3	7.5406	0.6	0.09	6	8.6	1.44	216.922	FALSE	FALSE	TRUE	1.98
115.433	38.8167	河北省	保定	13	500	0	3	7.5406	0.6	0.09	6	8.6	1.44	216.922	FALSE	FALSE	TRUE	0.71
115.433	38.8167	河北省	保定	13	500	180	3	7.54	0.6	0.09	6	8.6	1.44	217	FALSE	FALSE	TRUE	1.44
115.433	38.8167	河北省	保定	13	500	225	3	7.54	0.6	0.09	6	8.6	1.44	217	FALSE	FALSE	TRUE	1.56
115.433	38.8167	河北省	保定	12	550	285	3	6.98956	1.26	0.09	6	8.7	1.44	216.922	FALSE	FALSE	TRUE	1.374
115.433	38.8167	河北省	保定	12	550	0	3	6.98956	1.26	0.09	6	8.7	1.44	216.922	FALSE	FALSE	TRUE	0.565
115.452	38.8265	河北省	保定	12	555	300	3	6.3	0.6	0.09	6	7.7	1.44	214.16	FALSE	FALSE	TRUE	1.14
115.452	38.8265	河北省	保定	12	555	300	3	6.3	0.6	0.09	6	7.7	1.44	214.16	TRUE	FALSE	FALSE	3.62
115.452	38.8265	河北省	保定	12	555	0	3	6.3	0.6	0.09	6	7.7	1.44	214.16	FALSE	FALSE	TRUE	0.43
115.452	38.8265	河北省	保定	12	555	0	3	6.3	0.6	0.09	6	7.7	1.44	214.16	TRUE	FALSE	FALSE	0.51
115.25	39.1833	河北省	保定	12.3	555	168	3	9	1.05	0.21	16	8.1	1.41	55.7203	TRUE	FALSE	FALSE	2.75
115.25	39.1833	河北省	保定	12.3	555	172	3	9	1.05	0.21	16	8.1	1.41	55.7203	TRUE	FALSE	FALSE	7.22
115.25	39.1833	河北省	保定	12.3	555	176	3	9	1.05	0.21	16	8.1	1.41	55.7203	TRUE	FALSE	FALSE	2.78
115.25	39.1833	河北省	保定	12.3	555	0	3	9	1.05	0.21	16	8.1	1.41	55.7203	TRUE	FALSE	FALSE	0.4
115.25	39.1833	河北省	保定	12.3	555	0	3	9	1.05	0.21	16	8.1	1.41	55.7203	TRUE	FALSE	FALSE	0.85
115.25	39.1833	河北省	保定	12.3	555	0	3	9	1.05	0.21	16	8.1	1.41	55.7203	TRUE	FALSE	FALSE	0.94
115.25	39.1833	河北省	保定	10	559	176	3	7.71	0.98	0.15	16	8.7	1.41	55.7203	TRUE	FALSE	FALSE	5.8
118.301	40.2019	河北省	唐山	10.1	732	180	3	6.9	0.9	0.169	16	7.03	1.4	101.5	TRUE	FALSE	FALSE	1.45
118.301	40.2019	河北省	唐山	10.1	732	0	3	6.9	0.9	0.169	16	7.03	1.4	101.5	TRUE	FALSE	FALSE	0.45
118.301	40.2019	河北省	唐山	10.1	804.2	0	3	8.17865	0.9	0.169	7	7.03	1.48	14.9045	TRUE	FALSE	FALSE	0.61
114.033	33.3333	河南省	驻马店	15.8	1027	270	4	9.04292	1.53	0.3956	20	5.26	1.28	247.809	TRUE	FALSE	FALSE	4.67
114.033	33.3333	河南省	驻马店	15.8	1027	0	4	9.04292	1.53	0.3956	20	5.26	1.28	247.809	TRUE	FALSE	FALSE	3.38
114.033	33.3333	河南省	驻马店	15.8	1027	0	4	9.04292	1.53	0.3956	20	5.26	1.28	247.809	TRUE	FALSE	FALSE	4.52
114.417	34.05	河南省	周口	14	743	168.75	3	16.5777	1.18	0.102	14	8.52	1.49	261.455	FALSE	FALSE	TRUE	5.02
114.417	34.05	河南省	周口	14	743	168.75	3	16.5777	1.18	0.102	14	8.52	1.49	261.455	FALSE	FALSE	TRUE	5.07
115.5	34.5333	河南省	商丘	13.9	780	300	3	9.87	0.94	0.06	6	8.38	1.46	240.678	FALSE	FALSE	TRUE	0.58
115.5	34.5333	河南省	商丘	13.9	780	300	3	9.87	0.94	0.06	6	8.38	1.46	240.678	TRUE	FALSE	FALSE	2.79
114.4	35	河南省	新乡	13.9	615	150	3	3.93	0.4	0.11	6	8.4	1.40203	280.086	FALSE	FALSE	TRUE	0.32
114.4	35	河南省	新乡	13	565	150	3	5.74246	0.6	0.0570669	7.9	8.6	1.40203	280.086	TRUE	FALSE	FALSE	0.56
114.4	35	河南省	新乡	13.9	615	150	3	3.79	0.407	0.14	6	8.54	1.39	280.086	FALSE	FALSE	TRUE	0.63
114.4	35	河南省	新乡	13.9	615	150	3	3.79	0.407	0.14	6	8.54	1.39	280.086	FALSE	FALSE	TRUE	0.86
114.4	35	河南省	新乡	13.9	615	150	3	3.93	0.4	0.11	6	8.4	1.40203	280.086	TRUE	FALSE	FALSE	1.107
114.4	35	河南省	新乡	13.9	615	150	3	3.79	0.407	0.14	6	8.54	1.39	280.086	FALSE	FALSE	TRUE	1.38
114.4	35	河南省	新乡	13.9	615	150	3	3.79	0.407	0.14	6	8.54	1.39	280.086	TRUE	FALSE	FALSE	1.54
114.4	35	河南省	新乡	13.9	615	150	3	3.79	0.407	0.14	6	8.54	1.39	280.086	TRUE	FALSE	FALSE	2.29
114.4	35	河南省	新乡	13.9	615	200	3	7.41	0.85	0.158	6	8.81	1.4	280.086	FALSE	FALSE	TRUE	0.6
114.4	35	河南省	新乡	13.9	615	200	3	7.41	0.85	0.158	6	8.41	1.41	280.086	FALSE	FALSE	TRUE	0.62
114.4	35	河南省	新乡	14	625	200	3	6.49652	0.79	0.06	6	8.3	1.40203	280.086	TRUE	FALSE	FALSE	0.991
114.4	35	河南省	新乡	13.9	615	200	3	5.03	0.69	0.232	6	8.93	1.38	280.086	TRUE	FALSE	FALSE	2.28
114.4	35	河南省	新乡	13.9	615	200	3	7.41	0.85	0.158	6	8.81	1.4	280.086	TRUE	FALSE	FALSE	3.3
114.4	35	河南省	新乡	13.9	615	0	3	3.79	0.407	0.14	6	8.54	1.39	280.086	FALSE	FALSE	TRUE	0.04
114.4	35	河南省	新乡	13.9	615	0	3	3.79	0.407	0.14	6	8.54	1.39	280.086	TRUE	FALSE	FALSE	0.08
114.4	35	河南省	新乡	13.9	615	0	3	3.79	0.407	0.14	6	8.54	1.39	280.086	FALSE	FALSE	TRUE	0.08
114.4	35	河南省	新乡	13.9	615	0	3	4.43	0.4	0.0570669	6	8.53	1.45	280.086	TRUE	FALSE	FALSE	0.08
114.4	35	河南省	新乡	13.9	615	0	3	3.93	0.4	0.11	6	8.4	1.40203	280.086	FALSE	FALSE	TRUE	0.095
114.4	35	河南省	新乡	13.9	615	0	3	3.93	0.4	0.11	6	8.4	1.40203	280.086	TRUE	FALSE	FALSE	0.109
114.4	35	河南省	新乡	13.9	615	0	3	3.79	0.407	0.14	6	8.54	1.39	280.086	FALSE	FALSE	TRUE	0.11
114.4	35	河南省	新乡	13.9	615	0	3	12	1.5	0.11	6	8.6	1.4	280.086	FALSE	FALSE	TRUE	0.16
114.4	35	河南省	新乡	13	565	0	3	5.74246	0.6	0.0570669	7.9	8.6	1.40203	280.086	TRUE	FALSE	FALSE	0.18
114.4	35	河南省	新乡	13.9	615	0	3	3.79	0.407	0.14	6	8.54	1.39	280.086	TRUE	FALSE	FALSE	0.19
114.4	35	河南省	新乡	13.9	615	0	3	7.41	0.85	0.158	6	8.81	1.4	280.086	FALSE	FALSE	TRUE	0.22
114.4	35	河南省	新乡	13.9	615	0	3	7.41	0.85	0.158	6	8.41	1.41	280.086	FALSE	FALSE	TRUE	0.36
114.4	35	河南省	新乡	13.9	615	0	3	3.79	0.407	0.14	6	8.54	1.39	280.086	TRUE	FALSE	FALSE	0.4
114.4	35	河南省	新乡	13.9	615	0	3	5.03	0.69	0.232	6	8.93	1.38	280.086	TRUE	FALSE	FALSE	0.5
114.4	35	河南省	新乡	13.9	615	0	3	7.41	0.85	0.158	6	8.41	1.41	280.086	TRUE	FALSE	FALSE	0.5
114.4	35	河南省	新乡	13.9	615	0	3	7.41	0.85	0.158	6	8.81	1.4	280.086	TRUE	FALSE	FALSE	0.57
114.552	35.0204	河南省	新乡	13.9	605	150	4	5.83	0.445	0.232	6	8.65	1.57	290.664	FALSE	FALSE	TRUE	0.252
114.552	35.0204	河南省	新乡	13.9	605	150	4	5.83	0.445	0.232	6	8.65	1.57	290.664	TRUE	FALSE	FALSE	0.515
114.552	35.0204	河南省	新乡	13	560	150	4	5.79466	0.82	0.06	7.97	8.55	1.4	290.664	TRUE	FALSE	FALSE	1.46
114.552	35.0204	河南省	新乡	13	560	0	4	5.79466	0.82	0.06	7.97	8.55	1.4	290.664	TRUE	FALSE	FALSE	0.32
114.552	35.0204	河南省	新乡	13	560	0	4	5.79466	0.82	0.06	7.97	8.55	1.4	290.664	FALSE	FALSE	TRUE	0.64
113.85	35.15	河南省	新乡	14	656.3	225	3	8.45	0.81	0.131	6	8.05	1.37	254.9	FALSE	FALSE	TRUE	0.84
113.85	35.15	河南省	新乡	14	656.3	225	3	8.45	0.81	0.131	6	8.05	1.37	254.9	TRUE	FALSE	FALSE	2.92
113.85	35.15	河南省	新乡	14	656.3	225	3	8.45	0.81	0.131	6	8.05	1.37	254.9	TRUE	FALSE	FALSE	6.23
113.85	35.15	河南省	新乡	14	656.3	0	3	8.45	0.81	0.131	6	8.05	1.37	254.9	FALSE	FALSE	TRUE	0.35
113.85	35.15	河南省	新乡	14	656.3	0	3	8.45	0.81	0.131	6	8.05	1.37	254.9	FALSE	FALSE	TRUE	0.35
113.85	35.15	河南省	新乡	14	656.3	0	3	8.45	0.81	0.131	6	8.05	1.37	254.9	TRUE	FALSE	FALSE	0.96
113.85	35.15	河南省	新乡	14	656.3	0	3	8.45	0.81	0.131	6	8.05	1.37	254.9	TRUE	FALSE	FALSE	1.07
113.85	35.15	河南省	新乡	14	656.3	0	3	8.45	0.81	0.131	6	8.05	1.37	254.9	TRUE	FALSE	FALSE	1.07
113.801	35.1534	河南省	新乡	14	656.3	178.5	3	13.09	1.2	0.2539	16.76	8.32	1.3899	272	FALSE	FALSE	TRUE	0.817
113.801	35.1534	河南省	新乡	14	656.3	0	3	13.09	1.2	0.2539	16.76	8.32	1.3899	272	FALSE	FALSE	TRUE	0.287
121.363	29.7922	浙江省	宁波	16.4	1480	240	4	12.529	2.31	0.338	11	6.17	1.41	157.851	FALSE	TRUE	FALSE	0.14
121.363	29.7922	浙江省	宁波	16.4	1480	0	4	12.529	2.31	0.338	11	6.17	1.41	157.851	FALSE	TRUE	FALSE	0.07
121.363	29.7928	浙江省	宁波	18.1	1382	240	4	21.6	2.31	0.196	11	6.2	1.08	157.851	FALSE	FALSE	TRUE	1.62
121.363	29.7928	浙江省	宁波	18.1	1382	240	4	21.6	2.31	0.196	11	6.2	1.08	157.851	FALSE	FALSE	TRUE	1.86
121.363	29.7928	浙江省	宁波	18.1	1382	0	4	21.6	2.31	0.196	11	6.2	1.08	157.851	FALSE	FALSE	TRUE	0.2
121.363	29.7928	浙江省	宁波	18.1	1382	0	4	21.6	2.31	0.196	11	6.2	1.08	157.851	FALSE	FALSE	TRUE	0.24
119.75	30.4167	浙江省	杭州	16.4	1628.6	270	3	6.68213	1.64	0.227	12	5.46	1.2	83.0746	FALSE	TRUE	FALSE	1.43
119.75	30.4167	浙江省	杭州	16.4	1628.6	0	3	6.68213	1.64	0.227	12	5.46	1.2	83.0746	FALSE	TRUE	FALSE	0.05
119.75	30.4167	浙江省	杭州	16.4	1628.6	0	3	6.68213	1.64	0.227	12	5.46	1.2	83.0746	FALSE	TRUE	FALSE	0.07
120.667	30.8333	浙江省	嘉兴	15.7	1200	270	3	18.2	2.65	0.517	8.12	6.9	1.33	325.514	FALSE	TRUE	FALSE	0.327
120.667	30.8333	浙江省	嘉兴	15.7	1200	270	3	18.2	2.65	0.517	8.12	6.9	1.33	325.514	FALSE	TRUE	FALSE	0.332
120.667	30.8333	浙江省	嘉兴	15.7	1200	0	3	18.2	2.65	0.517	8.12	6.9	1.33	325.514	FALSE	TRUE	FALSE	0.095
120.667	30.8333	浙江省	嘉兴	15.7	1200	0	3	18.2	2.65	0.517	8.12	6.9	1.33	325.514	FALSE	TRUE	FALSE	0.099
120.667	30.8333	浙江省	嘉兴	15.7	1200	0	3	18.2	2.65	0.517	8.12	6.9	1.33	325.514	FALSE	TRUE	FALSE	0.177
109.598	18.2878	海南省	三亚	25.5	1347.5	144	3	7.78	1.72	0.1951	9	5.91	1.35	19	FALSE	TRUE	FALSE	0.697
109.598	18.2878	海南省	三亚	25.5	1347.5	180	3	7.78422	1.72	0.1951	9	5.91	1.35086	19.252	FALSE	TRUE	FALSE	1.376
109.598	18.2878	海南省	三亚	25.5	1347.5	0	3	7.78422	1.72	0.1951	9	5.91	1.35086	19.252	FALSE	TRUE	FALSE	0.183
110.067	19.9333	海南省	澄迈	23.8	1786.1	120	3	15.6613	1.08651	0.24	17	5.9	1.36	54.1697	FALSE	TRUE	FALSE	0.76
110.067	19.9333	海南省	澄迈	23.8	1786.1	150	3	15.6613	1.08651	0.24	17	5.9	1.36	54.1697	FALSE	TRUE	FALSE	0.322
110.067	19.9333	海南省	澄迈	23.8	1786.1	0	3	15.6613	1.08651	0.24	17	5.9	1.36	54.1697	FALSE	TRUE	FALSE	0.171
110.067	19.9333	海南省	澄迈	23.8	1786.1	0	3	15.6613	1.08651	0.24	17	5.9	1.36	54.1697	FALSE	TRUE	FALSE	0.18
110.067	19.9333	海南省	澄迈	24.8	1819.2	105	3	17.1694	1.8	0.168	32.4	5.7	1.36	54.1697	FALSE	TRUE	FALSE	0.473
110.067	19.9333	海南省	澄迈	23.8	1786.1	108.8	3	12.4594	0.72	0.352	17	5.3	1.36	54.1697	FALSE	TRUE	FALSE	1.56
110.067	19.9333	海南省	澄迈	23.8	1786.1	197	3	12.4594	0.72	0.352	17	5.3	1.36	54.1697	FALSE	TRUE	FALSE	3.4
110.067	19.9333	海南省	澄迈	24.8	1819.2	0	3	17.1694	1.8	0.168	32.4	5.7	1.36	54.1697	FALSE	TRUE	FALSE	0.247
110.067	19.9333	海南省	澄迈	23.8	1786.1	0	3	12.4594	0.72	0.352	17	5.3	1.36	54.1697	FALSE	TRUE	FALSE	0.49
110.067	19.9333	海南省	澄迈	23.8	1786.1	0	3	12.4594	0.72	0.352	17	5.3	1.36	54.1697	FALSE	TRUE	FALSE	0.78
115.55	29.85	湖北省	黄冈	17.8	1361	144	3	16.89	2.2	0.18	14	4.79	1.21	127.489	FALSE	FALSE	TRUE	2.04
115.55	29.85	湖北省	黄冈	17.8	1361	180	3	16.89	2.2	0.18	14	4.79	1.21	127.489	FALSE	TRUE	FALSE	1.65
115.55	29.85	湖北省	黄冈	18	1361	0	3	24.07	2.39	0.129	14	5.18	1.39	127.489	FALSE	TRUE	FALSE	0.59
115.5	29.9167	湖北省	黄冈	16.8	1360.65	180	3	22.7	1.63	0.21	11	6.27	1.12	129	FALSE	TRUE	FALSE	0.82
115.5	29.9167	湖北省	黄冈	16.8	1360.65	180	3	22.7	1.63	0.21	11	6.27	1.12	129	FALSE	TRUE	FALSE	0.96
115.5	29.9167	湖北省	黄冈	16.8	1360.65	0	3	22.7	1.63	0.21	11	6.27	1.12	129	FALSE	TRUE	FALSE	0.39
115.5	29.9167	湖北省	黄冈	16.8	1360.65	0	3	22.7	1.63	0.21	11	6.27	1.12	129	FALSE	TRUE	FALSE	0.73
115.5	29.9167	湖北省	黄冈	16.8	1360.6	210	3	15.6613	2.48	0.201825	11	5.85	1.28	129	FALSE	TRUE	FALSE	3.24
115.5	29.9167	湖北省	黄冈	16.8	1360.65	210	3	18.29	3.57	0.201825	11	6.58	1.26	129	FALSE	TRUE	FALSE	5.61
115.5	29.9167	湖北省	黄冈	16.8	1360.6	0	3	15.6613	2.48	0.201825	11	5.85	1.28	129	FALSE	TRUE	FALSE	0.28
115.5	29.9167	湖北省	黄冈	16.8	1360.65	0	3	18.29	3.57	0.201825	11	6.58	1.26	129	FALSE	TRUE	FALSE	0.5871
112.15	30.35	湖北省	荆州	16.7	927	165	3	26.88	1.09	0.197	16	7.8	1.44	136.594	FALSE	TRUE	FALSE	0.27
112.15	30.35	湖北省	荆州	16.2	1200	165	3	26.88	1.09	0.166	16	7.8	1.44	136.594	FALSE	TRUE	FALSE	0.27
112.15	30.35	湖北省	荆州	23.7	623	165	3	28.38	1.37	0.283	16	7.2	1.44	136.594	FALSE	TRUE	FALSE	0.97
112.15	30.35	湖北省	荆州	24.5	431	165	3	13.58	1.45	0.283	16	7.7	1.39018	136.594	FALSE	TRUE	FALSE	1.3
112.15	30.35	湖北省	荆州	24.3	297	180	3	13.58	1.45	0.283	16	7.7	1.39018	136.594	FALSE	TRUE	FALSE	1.7
112.15	30.35	湖北省	荆州	16.7	927	180	3	26.88	1.09	0.197	16	7.8	1.44	136.594	FALSE	TRUE	FALSE	2
112.15	30.35	湖北省	荆州	23.7	623	180	3	28.38	1.37	0.283	16	7.2	1.44	136.594	FALSE	TRUE	FALSE	2.84
112.15	30.35	湖北省	荆州	16.7	927	180	3	26.88	1.09	0.197	16	7.8	1.44	136.594	FALSE	TRUE	FALSE	4.14
112.25	30.4333	湖北省	荆州	15.4	1200	165	3	18.91	2	0.21	11	6.1	1.41	121	FALSE	TRUE	FALSE	1.4
112.25	30.4333	湖北省	荆州	15.4	1200	210	3	18.9095	2	0.21	11	6.1	1.41	121.096	FALSE	TRUE	FALSE	1.6
114.051	30.5978	湖北省	武汉	16	1300	147	3	12.007	0.86	0.2	14	6.3	1.34	126.25	FALSE	TRUE	FALSE	1.18
114.051	30.5978	湖北省	武汉	16	1300	157.5	3	12.007	0.86	0.2	14	6.3	1.34	126.25	FALSE	FALSE	TRUE	2.71
114.051	30.5978	湖北省	武汉	16	1300	225	3	12.007	0.86	0.2	14	6.3	1.34	126.249	FALSE	FALSE	TRUE	3.08
112.873	30.8646	湖北省	荆门	16	1085	165	3	18.91	1.95	0.392	12.6	5.88	1.28	71	FALSE	TRUE	FALSE	2.64
112.873	30.8646	湖北省	荆门	16	1085	225	3	18.91	1.95	0.392	12.6	5.88	1.28	70.7128	FALSE	TRUE	FALSE	3.57
112.873	30.8646	湖北省	荆门	16	1085	0	3	18.91	1.95	0.392	12.6	5.88	1.28	70.7128	FALSE	TRUE	FALSE	0.95
110.718	32.1203	湖北省	十堰	14.2	914	150	3	11.9	1.31	0.198	11	6	1.36	14.6202	FALSE	TRUE	FALSE	1.85
110.718	32.1203	湖北省	十堰	14.2	914	0	3	11.9	1.31	0.198	11	6	1.36	14.6202	FALSE	TRUE	FALSE	0.1
110.718	32.1203	湖北省	十堰	14.2	914	0	3	11.9	1.31	0.198	11	6	1.36	14.6202	FALSE	TRUE	FALSE	0.19
112.667	32.1667	湖北省	襄阳	15.5	750	270	3	19.7796	2.27	0.194782	11	6.41	1.4186	59.8137	FALSE	TRUE	FALSE	1.52
111.867	26.75	湖南省	永州	18.6	1431	300	2	9.94	1.18	0.479458	10	4.5	1.19	80.6284	TRUE	FALSE	FALSE	0.4426
111.87	26.76	湖南省	永州	18.6	1454	0	2	6.06	1.07	0.48612	10	5.7	1.26	80.2334	TRUE	FALSE	FALSE	0.14
111.87	26.76	湖南省	永州	18.6	1454	0	2	6.06	1.07	0.48612	10	5.7	1.26	80.2334	FALSE	FALSE	TRUE	0.16
113.2	28.1333	湖南省	长沙	17.1	1500	240	3	18.76	1.79	0.346	11	6.21	0.91	109.572	FALSE	TRUE	FALSE	1.46
113.2	28.1383	湖南省	长沙	17.1	1316	150	3	21.8677	1.92	0.206452	11	5.88	1.37097	111.367	FALSE	TRUE	FALSE	0.9
113.2	28.1383	湖南省	长沙	17.1	1316	180	3	21.8677	1.92	0.206452	11	5.88	1.37097	111.367	FALSE	TRUE	FALSE	0.42
113.2	28.1383	湖南省	长沙	17.1	1316	0	3	21.8677	1.92	0.206452	11	5.88	1.37097	111.367	FALSE	TRUE	FALSE	0.21
113.2	28.1383	湖南省	长沙	17.1	1316	0	3	21.8677	1.92	0.206452	11	5.88	1.37097	111.367	FALSE	TRUE	FALSE	0.42
113.2	28.1383	湖南省	长沙	17.1	1500	270	3	19.3	2.04	0.346	11	6	1.41	111.367	FALSE	TRUE	FALSE	1.26
113.2	28.1383	湖南省	长沙	17.1	1500	0	3	19.3	2.04	0.346	11	6	1.41	111.367	FALSE	TRUE	FALSE	0.54
113.2	28.1383	湖南省	长沙	17.1	1500	0	3	19.3	2.04	0.346	11	6	1.41	111.367	FALSE	TRUE	FALSE	0.59
113.2	28.1383	湖南省	长沙	17.1	1500	0	3	19.3	2.04	0.346	11	6	1.41	111.367	FALSE	TRUE	FALSE	0.67
113.617	28.15	湖南省	长沙	17.5	1551.3	120	4	18.4	1.09	0.198	10	6.3	1.14	35	FALSE	TRUE	FALSE	0.147
113.617	28.15	湖南省	长沙	17.5	1551.3	120	4	18.4	1.09	0.198	10	6.3	1.14	35	FALSE	TRUE	FALSE	0.168
113.617	28.15	湖南省	长沙	17.5	1551.3	120	4	18.4	1.09	0.198	10	6.3	1.14	35	FALSE	TRUE	FALSE	0.212
113.617	28.15	湖南省	长沙	17.5	1551.3	135	4	18.4	1.09	0.198	10	6.3	1.14	35	FALSE	TRUE	FALSE	0.136
113.617	28.15	湖南省	长沙	17.5	1551.3	135	4	18.4	1.09	0.198	10	6.3	1.14	35	FALSE	TRUE	FALSE	0.339
113.617	28.15	湖南省	长沙	17.5	1551.3	135	4	18.4	1.09	0.198	10	6.3	1.14	35	FALSE	TRUE	FALSE	0.371
113.617	28.15	湖南省	长沙	17.5	1551.3	0	4	18.4	1.09	0.198	10	6.3	1.14	35.0495	FALSE	TRUE	FALSE	0.076
113.617	28.15	湖南省	长沙	17.5	1551.3	0	4	18.4	1.09	0.198	10	6.3	1.14	35.0495	FALSE	TRUE	FALSE	0.088
113.617	28.15	湖南省	长沙	17.5	1551.3	0	4	18.4	1.09	0.198	10	6.3	1.14	35.0495	FALSE	TRUE	FALSE	0.098
113.617	28.15	湖南省	长沙	17.5	1551.3	0	4	18.4	1.09	0.198	10	6.3	1.14	35.0495	FALSE	TRUE	FALSE	0.129
113.617	28.15	湖南省	长沙	17.5	1551.3	0	4	18.4	1.09	0.198	10	6.3	1.14	35.0495	FALSE	TRUE	FALSE	0.161
113.617	28.15	湖南省	长沙	17.5	1551.3	0	4	18.4	1.09	0.198	10	6.3	1.14	35.0495	FALSE	TRUE	FALSE	0.183
113.617	28.15	湖南省	长沙	17.2	1361	120	4	18.4	1.09	0.4766	10	6.3	1.14	35	FALSE	TRUE	FALSE	0.147
113.617	28.15	湖南省	长沙	17.2	1361	120	4	18.4	1.09	0.4766	10	6.3	1.14	35	FALSE	TRUE	FALSE	0.168
113.617	28.15	湖南省	长沙	17.2	1361	120	4	18.4	1.09	0.4766	10	6.3	1.14	35	FALSE	TRUE	FALSE	0.212
113.617	28.15	湖南省	长沙	17.2	1361	135	4	18.4	1.09	0.4766	10	6.3	1.14	35	FALSE	TRUE	FALSE	0.136
113.617	28.15	湖南省	长沙	17.2	1361	135	4	18.4	1.09	0.4766	10	6.3	1.14	35	FALSE	TRUE	FALSE	0.339
113.617	28.15	湖南省	长沙	17.2	1361	135	4	18.4	1.09	0.4766	10	6.3	1.14	35	FALSE	TRUE	FALSE	0.371
113.617	28.15	湖南省	长沙	17.2	1361	150	4	18.4	1.09	0.476565	10	6.3	1.14	35.0495	FALSE	TRUE	FALSE	0.144
113.617	28.15	湖南省	长沙	17.2	1361	150	4	18.4	1.09	0.476565	10	6.3	1.14	35.0495	FALSE	TRUE	FALSE	0.157
113.617	28.15	湖南省	长沙	17.2	1361	150	4	18.4	1.09	0.476565	10	6.3	1.14	35.0495	FALSE	TRUE	FALSE	0.248
113.617	28.15	湖南省	长沙	17.2	1361	165	4	18.4	1.09	0.476565	10	6.3	1.14	35.0495	FALSE	TRUE	FALSE	0.373
113.617	28.15	湖南省	长沙	17.2	1361	165	4	18.4	1.09	0.476565	10	6.3	1.14	35.0495	FALSE	TRUE	FALSE	0.441
113.617	28.15	湖南省	长沙	17.2	1361	165	4	18.4	1.09	0.476565	10	6.3	1.14	35.0495	FALSE	TRUE	FALSE	0.442
113.617	28.15	湖南省	长沙	17.2	1361	0	4	18.4	1.09	0.476565	10	6.3	1.14	35.0495	FALSE	TRUE	FALSE	0.076
113.617	28.15	湖南省	长沙	17.2	1361	0	4	18.4	1.09	0.476565	10	6.3	1.14	35.0495	FALSE	TRUE	FALSE	0.088
113.617	28.15	湖南省	长沙	17.2	1361	0	4	18.4	1.09	0.476565	10	6.3	1.14	35.0495	FALSE	TRUE	FALSE	0.098
113.617	28.15	湖南省	长沙	17.2	1361	0	4	18.4	1.09	0.476565	10	6.3	1.14	35.0495	FALSE	TRUE	FALSE	0.129
113.617	28.15	湖南省	长沙	17.2	1361	0	4	18.4	1.09	0.476565	10	6.3	1.14	35.0495	FALSE	TRUE	FALSE	0.161
113.617	28.15	湖南省	长沙	17.2	1361	0	4	18.4	1.09	0.476565	10	6.3	1.14	35.0495	FALSE	TRUE	FALSE	0.183
113.862	28.2957	湖南省	长沙	16	1589	150	3	8.10325	3.21	0.198	11	5.7	1.41	46.5543	FALSE	TRUE	FALSE	0.16038
113.862	28.2957	湖南省	长沙	16	1589	180	3	8.10325	3.21	0.198	11	5.7	1.41	46.5543	FALSE	TRUE	FALSE	0.31002
113.862	28.2957	湖南省	长沙	16	1589	0	3	8.10325	3.21	0.198	11	5.7	1.41	46.5543	FALSE	TRUE	FALSE	0.02888
113.862	28.2957	湖南省	长沙	16	1589	0	3	8.10325	3.21	0.198	11	5.7	1.41	46.5543	FALSE	TRUE	FALSE	0.04571
113.834	28.2963	湖南省	长沙	17.3	1552.3	0	3	8.45128	1.51	0.346	11	5.75	1.41	46.5036	TRUE	FALSE	FALSE	0.037
113.843	28.3008	湖南省	长沙	17.3	1552	240	3	8.45	3.51	0.194509	11	5.75	1.73	47.0757	TRUE	FALSE	FALSE	2.05
113.843	28.3008	湖南省	长沙	17.3	1552	0	3	8.45	3.51	0.194509	11	5.75	1.73	47.0757	TRUE	FALSE	FALSE	0.38
113.817	28.3167	湖南省	长沙	17.4	1538.2	150	3	9.64037	1.21	0.346	11	5.61	1.41	48.2435	FALSE	TRUE	FALSE	17.59
113.817	28.3167	湖南省	长沙	17.4	1538.2	180	3	9.64037	1.21	0.346	11	5.61	1.41	48.2435	FALSE	TRUE	FALSE	5.67
113.817	28.317	湖南省	长沙	16	1551	120	3	9.64037	1.21	0.225845	11	5.61	1.40061	48.2435	FALSE	TRUE	FALSE	21.8
113.817	28.317	湖南省	长沙	16	1551	0	3	9.64037	1.21	0.225845	11	5.61	1.40061	48.2435	FALSE	TRUE	FALSE	16.9
113.01	28.5	湖南省	岳阳	17.2	1400	0	3	12.42	1.11	0.484838	10	5.12	1.63	160.276	FALSE	TRUE	FALSE	0.91
113.331	28.5511	湖南省	长沙	16	1361	120	3	18.9	2.08	0.272	11	5.08	1.31	92.4126	FALSE	TRUE	FALSE	0.110345
113.331	28.5511	湖南省	长沙	16	1361	150	3	18.9	2.08	0.272	11	5.08	1.31	92.4126	FALSE	TRUE	FALSE	0.0465517
113.331	28.5511	湖南省	长沙	17.5	1330	120	3	18.9	2.1	0.272	11	5.1	1.31	92.4126	FALSE	TRUE	FALSE	0.11
113.331	28.5511	湖南省	长沙	17.5	1330	150	3	18.9	2.1	0.272	11	5.1	1.31	92.4126	FALSE	TRUE	FALSE	0.08
112.8	28.6759	湖南省	岳阳	16	1356	128	3	12.0824	1.77	0.155	11	5.41	1.41	164.991	FALSE	TRUE	FALSE	0.37909
112.8	28.6759	湖南省	岳阳	16	1356	150	3	12.0824	1.77	0.155	11	5.41	1.41	164.991	FALSE	TRUE	FALSE	0.53031
112.8	28.6759	湖南省	岳阳	16	1356	0	3	12.0824	1.77	0.155	11	5.41	1.41	164.991	FALSE	TRUE	FALSE	0.06438
112.8	28.6759	湖南省	岳阳	16	1356	0	3	12.0824	1.77	0.155	11	5.41	1.41	164.991	FALSE	TRUE	FALSE	0.16344
107.667	35.2	甘肃省	平凉	9.4	560	200	3	6.5	0.8	0.22	9	8.4	1.3	77	TRUE	FALSE	FALSE	1.28
107.667	35.2	甘肃省	平凉	9.2	560	200	3	6.5	0.8	0.24	9	8.4	1.41	76	TRUE	FALSE	FALSE	1.88
107.667	35.2	甘肃省	平凉	9.2	560	200	3	6.5	0.8	0.24	9	8.4	1.41	76	TRUE	FALSE	FALSE	1.97
107.667	35.2	甘肃省	平凉	9.4	560	0	3	6.5	0.8	0.22	9	8.4	1.3	77	TRUE	FALSE	FALSE	0.39
107.667	35.2	甘肃省	平凉	9.4	560	0	3	6.5	0.8	0.22	9	8.4	1.3	77	TRUE	FALSE	FALSE	0.52
107.667	35.2	甘肃省	平凉	9.2	560	0	3	6.5	0.8	0.24	9	8.4	1.41	76	TRUE	FALSE	FALSE	0.72
107.667	35.2	甘肃省	平凉	9.2	560	0	3	6.5	0.8	0.24	9	8.4	1.41	76	TRUE	FALSE	FALSE	0.87
107.667	35.2	甘肃省	平凉	9.4	560	160	3	6.5	0.8	0.22	9	8.4	1.3	77	TRUE	FALSE	FALSE	0.9
107.667	35.2	甘肃省	平凉	9.4	560	160	3	6.5	0.8	0.22	9	8.4	1.3	77	TRUE	FALSE	FALSE	1.01
107.667	35.2	甘肃省	平凉	9.2	560	160	3	6.5	0.8	0.24	9	8.4	1.41	76	TRUE	FALSE	FALSE	1.36
107.667	35.2	甘肃省	平凉	9.2	560	160	3	6.5	0.8	0.24	9	8.4	1.41	76	TRUE	FALSE	FALSE	1.43
107.667	35.2	甘肃省	平凉	9.1	580	225	3	9.2	1.5	0.201	9	8	1.2	158	TRUE	FALSE	FALSE	0.28
107.667	35.2	甘肃省	平凉	9.1	580	225	3	9.2	1.5	0.201	9	8	1.2	158	TRUE	FALSE	FALSE	0.31
107.667	35.2	甘肃省	平凉	9.1	585	120	3	6.5	0.7	0.190057	9	6.40456	1.41	77	FALSE	FALSE	TRUE	2.899
107.667	35.2	甘肃省	平凉	9.1	585	120	3	6.5	0.7	0.190057	9	6.40456	1.41	77	FALSE	FALSE	TRUE	3.52
107.667	35.2	甘肃省	平凉	9.1	560	250	3	6.5	0.8	0.19	9	8.4	1.35	76	TRUE	FALSE	FALSE	0.57
107.667	35.2	甘肃省	平凉	9.1	560	250	3	6.5	0.8	0.19	9	8.4	1.35	76	TRUE	FALSE	FALSE	0.88
107.667	35.2	甘肃省	平凉	9.1	560	0	3	6.5	0.8	0.19	9	8.4	1.35	76	TRUE	FALSE	FALSE	0.34
107.667	35.2	甘肃省	平凉	9.1	560	0	3	6.5	0.8	0.19	9	8.4	1.35	76	TRUE	FALSE	FALSE	0.42
107.667	35.2	甘肃省	平凉	9.1	585	0	3	6.5	0.7	0.190057	9	6.40456	1.41	77	FALSE	FALSE	TRUE	1.48
107.667	35.2	甘肃省	平凉	9.1	585	0	3	6.5	0.7	0.190057	9	6.40456	1.41	77	FALSE	FALSE	TRUE	1.681
107.67	35.2	甘肃省	平凉	9.1	578.5	0	3	6.09049	1.02	0.228	9	8.3	1.38	146	FALSE	FALSE	TRUE	0.48
107.88	35.28	甘肃省	庆阳	9.2	582	0	3	9.51276	1.05	0.21	16	8.4	1.3	74	TRUE	FALSE	FALSE	0.44
107.88	35.28	甘肃省	庆阳	9.2	582	0	3	9.51276	1.05	0.21	16	8.4	1.3	74	TRUE	FALSE	FALSE	0.51
107.493	35.495	甘肃省	庆阳	10	552	225	3	8.23666	1.07	0.2	16	8.69	1.31	163	TRUE	FALSE	FALSE	1.117
107.493	35.495	甘肃省	庆阳	10	552	225	3	8.23666	1.07	0.2	16	8.69	1.31	163	TRUE	FALSE	FALSE	1.34
107.493	35.495	甘肃省	庆阳	10	552	0	3	8.23666	1.07	0.2	16	8.69	1.31	163	TRUE	FALSE	FALSE	0.45
107.493	35.495	甘肃省	庆阳	10	552	0	3	8.23666	1.07	0.2	16	8.69	1.31	163	TRUE	FALSE	FALSE	0.894
100.35	38.9	甘肃省	张掖	7.38	146	180	4	8	0.77	0.21	11	8.6	1.38	240	FALSE	FALSE	TRUE	1.03
100.35	38.9	甘肃省	张掖	7.4	127	180	3	8	0.77	0.159	11	8.6	1.38	240	FALSE	FALSE	TRUE	1.03
100.35	38.9	甘肃省	张掖	7.38	146	180	4	8	0.77	0.21	11	8.6	1.38	240	FALSE	FALSE	TRUE	1.04
100.35	38.9	甘肃省	张掖	7.4	127	180	3	8	0.77	0.159	11	8.6	1.38	240	FALSE	FALSE	TRUE	1.04
100.35	38.9	甘肃省	张掖	7.38	146	280	4	8.00464	0.77	0.21002	11	8.6	1.38	240.27	FALSE	FALSE	TRUE	1.36
100.35	38.9	甘肃省	张掖	7.38	146	280	4	8.00464	0.77	0.21002	11	8.6	1.38	240.27	FALSE	FALSE	TRUE	1.39
100.35	38.9	甘肃省	张掖	7.38	146	0	4	8.00464	0.77	0.21002	11	8.6	1.38	240.27	FALSE	FALSE	TRUE	0.41
100.35	38.9	甘肃省	张掖	7.4	127	0	3	8.00464	0.77	0.159	11	8.6	1.38	240.27	FALSE	FALSE	TRUE	0.41
100.35	38.9	甘肃省	张掖	7.38	146	0	4	8.00464	0.77	0.21002	11	8.6	1.38	240.27	FALSE	FALSE	TRUE	0.44
100.35	38.9	甘肃省	张掖	7.4	127	0	3	8.00464	0.77	0.159	11	8.6	1.38	240.27	FALSE	FALSE	TRUE	0.44
100.433	38.9333	甘肃省	张掖	7	130	300	4	7.25	0.87	0.064	10	8.2	1.36	205	TRUE	FALSE	FALSE	1.71
100.433	38.9333	甘肃省	张掖	7	130	300	4	7.25	0.87	0.064	10	8.2	1.36	205	TRUE	FALSE	FALSE	1.74
100.433	38.9333	甘肃省	张掖	7	130	300	4	7.25	0.87	0.064	10	8.2	1.36	205	TRUE	FALSE	FALSE	1.79
100.433	38.9333	甘肃省	张掖	7	130	300	4	7.25	0.87	0.064	10	8.2	1.36	205	TRUE	FALSE	FALSE	1.91
100.433	38.9333	甘肃省	张掖	7	130	300	4	7.25	0.87	0.064	10	8.2	1.36	205	TRUE	FALSE	FALSE	2.02
100.433	38.9333	甘肃省	张掖	7	130	450	4	7.25058	0.87	0.064	10	8.2	1.36	204.534	TRUE	FALSE	FALSE	3.02
100.433	38.9333	甘肃省	张掖	7	130	450	4	7.25058	0.87	0.064	10	8.2	1.36	204.534	TRUE	FALSE	FALSE	3.5
100.433	38.9333	甘肃省	张掖	7	130	450	4	7.25058	0.87	0.064	10	8.2	1.36	204.534	TRUE	FALSE	FALSE	3.7
100.433	38.9333	甘肃省	张掖	7	130	450	4	7.25058	0.87	0.064	10	8.2	1.36	204.534	TRUE	FALSE	FALSE	3.85
100.433	38.9333	甘肃省	张掖	7	130	450	4	7.25058	0.87	0.064	10	8.2	1.36	204.534	TRUE	FALSE	FALSE	3.89
100.433	38.9333	甘肃省	张掖	7	130	0	4	7.25058	0.87	0.064	10	8.2	1.36	204.534	TRUE	FALSE	FALSE	0.22
100.433	38.9333	甘肃省	张掖	7	130	0	4	7.25058	0.87	0.064	10	8.2	1.36	204.534	TRUE	FALSE	FALSE	0.29
100.433	38.9333	甘肃省	张掖	7	130	0	4	7.25058	0.87	0.064	10	8.2	1.36	204.534	TRUE	FALSE	FALSE	0.3
100.433	38.9333	甘肃省	张掖	7	130	0	4	7.25058	0.87	0.064	10	8.2	1.36	204.534	TRUE	FALSE	FALSE	0.32
100.433	38.9333	甘肃省	张掖	7	130	0	4	7.25058	0.87	0.064	10	8.2	1.36	204.534	TRUE	FALSE	FALSE	0.37
119.3	26.1	福建省	福州	19.6	1392.5	148	3	15.7019	0.76	0.21	16	7.2	1.36	59.6115	FALSE	TRUE	FALSE	0.1829
119.3	26.1	福建省	福州	19.6	1392.5	148	3	15.7019	0.76	0.21	16	7.2	1.36	59.6115	FALSE	TRUE	FALSE	0.4347
107.1	26.87	贵州省	贵阳	13.5	1129.9	120	3	23.0452	1.64	0.54	14	7.42	1.21	41	TRUE	FALSE	FALSE	0.18
107.1	26.87	贵州省	贵阳	13.5	1129.9	0	3	23.0452	1.64	0.54	14	7.42	1.21	41	TRUE	FALSE	FALSE	0.12
121.35	41.1333	辽宁省	锦州	8.7	610	210	3	13.1671	1.41	0.193	16	7.1	1.33	40.44	TRUE	FALSE	FALSE	0.96
121.35	41.1333	辽宁省	锦州	8.7	610	210	3	13.1671	1.41	0.193	16	7.1	1.33	40.44	TRUE	FALSE	FALSE	1.03
121.35	41.1333	辽宁省	锦州	8.7	610	0	3	13.1671	1.41	0.193	16	7.1	1.33	40.4394	TRUE	FALSE	FALSE	0.54
121.35	41.1333	辽宁省	锦州	8.7	610	0	3	13.1671	1.41	0.193	16	7.1	1.33	40.4394	TRUE	FALSE	FALSE	0.63
121.348	41.1451	辽宁省	锦州	8.7	446.9	210	3	13.17	1.41	0.244	16	7.1	1.55	39	TRUE	FALSE	FALSE	0.96
121.348	41.1451	辽宁省	锦州	8.7	446.9	210	3	13.17	1.41	0.244	16	7.1	1.55	39	TRUE	FALSE	FALSE	1.03
121.348	41.1451	辽宁省	锦州	8.7	446.9	210	3	13.17	1.41	0.244	16	7.1	1.55	39	TRUE	FALSE	FALSE	1.88
121.348	41.1451	辽宁省	锦州	8.7	446.9	0	3	13.1671	1.41	0.243955	16	7.1	1.54989	39.3493	TRUE	FALSE	FALSE	0.54
121.348	41.1451	辽宁省	锦州	8.7	446.9	0	3	13.1671	1.41	0.243955	16	7.1	1.54989	39.3493	TRUE	FALSE	FALSE	0.63
121.348	41.1451	辽宁省	锦州	8.7	446.9	0	3	13.1671	1.41	0.243955	16	7.1	1.54989	39.3493	TRUE	FALSE	FALSE	1.28
123.367	41.5167	辽宁省	沈阳	7.5	675	0	3	9.55336	0.86	0.218034	20	6.7	1.34495	93.3169	FALSE	FALSE	TRUE	0.8
123.367	41.5167	辽宁省	沈阳	7.5	675	0	3	9.55336	0.86	0.218034	20	6.7	1.34495	93.3169	TRUE	FALSE	FALSE	1.1
123.57	41.83	辽宁省	沈阳	7	732	0	3	10.4756	1.2	0.234	20	5.37	1.3	111	TRUE	FALSE	FALSE	1.52
123.576	41.8327	辽宁省	沈阳	7	731	60	3	10.9165	1.1	0.22	13	7.9	1.31	32.9859	TRUE	FALSE	FALSE	0.3598
123.576	41.8327	辽宁省	沈阳	7	710	160	3	10.9165	0.958003	0.22	13	7.6	1.21	32.9859	TRUE	FALSE	FALSE	0.359
123.576	41.8327	辽宁省	沈阳	7	731	0	3	10.9165	1.1	0.22	13	7.9	1.31	32.9859	TRUE	FALSE	FALSE	0.1646
123.576	41.8327	辽宁省	沈阳	7	710	0	3	10.9165	0.958003	0.22	13	7.6	1.21	32.9859	TRUE	FALSE	FALSE	0.165
123.11	41.85	辽宁省	沈阳	8	703	225	3	20.6845	0.98	0.141	11	7.38	1.41	131.193	FALSE	TRUE	FALSE	4.08
123.11	41.85	辽宁省	沈阳	8	703	0	3	20.6845	0.98	0.141	11	7.38	1.41	131.193	FALSE	TRUE	FALSE	1.68
123.933	42.3667	辽宁省	铁岭	7.4	700	180	3	10.6148	0.8	0.21	11	6.9	1.40819	35.8863	TRUE	FALSE	FALSE	5.3
123.933	42.3667	辽宁省	铁岭	7.4	700	0	3	10.6148	0.8	0.21	11	6.9	1.40819	35.8863	TRUE	FALSE	FALSE	2.3
123.933	42.3667	辽宁省	铁岭	7.4	700	150	3	10.6148	0.83	0.209099	11	6.9	1.40819	35.8863	TRUE	FALSE	FALSE	8.3
123.933	42.3667	辽宁省	铁岭	7.4	700	0	3	10.6148	0.83	0.209099	11	6.9	1.40819	35.8863	TRUE	FALSE	FALSE	4.6
123.75	42.8167	辽宁省	铁岭	6.5	569	200	3	10.96	1.3	0.238	16	5.7	1.54	33	TRUE	FALSE	FALSE	0.32
123.75	42.8167	辽宁省	铁岭	6.5	569	200	3	10.96	1.3	0.238	16	5.7	1.54	33	TRUE	FALSE	FALSE	0.71
124	43.1667	辽宁省	铁岭	6	608	0	3	12.761	4.28	0.088	13	5.6	1.43	45	TRUE	FALSE	FALSE	0.27
106.37	29.8853	重庆市	北碚	18.4	1086.6	244	3	14.1	1.27	0.197	11	5.65	1.36921	45.409	TRUE	FALSE	FALSE	7.2
106.37	29.8853	重庆市	北碚	18.4	1086.6	0	3	14.1	1.27	0.197	11	5.65	1.36921	45.409	TRUE	FALSE	FALSE	1.4
108.033	34.0667	陕西省	西安	13	575	220	3	9.91879	0.9	0.132	16	7.4	1.41	88.1812	FALSE	FALSE	TRUE	0.672
108.033	34.0667	陕西省	西安	13	575	0	3	9.91879	0.9	0.132	16	7.4	1.41	88.1812	FALSE	FALSE	TRUE	0.394
108.957	34.2256	陕西省	西安	23.8	417	114	5	8.82	0.4	0.21	11	7.9	1.41	183	FALSE	FALSE	TRUE	0.609
108.957	34.2256	陕西省	西安	23.8	417	124	5	8.82	0.4	0.21	11	7.9	1.41	183	FALSE	FALSE	TRUE	0.645
108.957	34.2256	陕西省	西安	9	197	157	5	9.11	0.4	0.21	11	7.9	1.41	183	TRUE	FALSE	FALSE	1.19
108.957	34.2256	陕西省	西安	9	197	186	5	9.11	0.4	0.21	11	7.9	1.41	183	TRUE	FALSE	FALSE	1.41
108.957	34.2256	陕西省	西安	23.8	417	218	5	8.81671	0.4	0.21	11	7.9	1.41	182.938	FALSE	FALSE	TRUE	1.07
108.957	34.2256	陕西省	西安	9	197	296	5	9.10673	0.4	0.21	11	7.9	1.41	182.938	TRUE	FALSE	FALSE	2.67
108.067	34.2667	陕西省	咸阳	12	600	225	3	7.33179	0.71	0.22	11	7.33	1.3	153.463	FALSE	FALSE	TRUE	0.61
108.067	34.2833	陕西省	咸阳	12	550	180	3	4.51856	1.4	0.21	11	8.26	1.41	157.736	FALSE	FALSE	TRUE	0.419355
108.067	34.2833	陕西省	咸阳	12	550	225	3	4.51856	1.4	0.21	11	8.26	1.41	157.736	TRUE	FALSE	FALSE	1.09197
108.067	34.2939	陕西省	咸阳	12	600	0	3	7.05	1.18	0.211198	11	7.9	1.25	159.894	TRUE	FALSE	FALSE	0.88
108.013	34.2975	陕西省	咸阳	12.9	550	220	3	9.91879	0.93	0.32	12	7.44	1.21	162.937	FALSE	FALSE	TRUE	0.66
108.013	34.2975	陕西省	咸阳	12.9	550	0	3	9.91879	0.93	0.32	12	7.44	1.21	162.937	FALSE	FALSE	TRUE	0.29
108.013	34.2975	陕西省	咸阳	12.9	575	165	3	8.7587	0.68	0.267	12	7.8	1.34	162.937	FALSE	FALSE	TRUE	1.415
108.013	34.2975	陕西省	咸阳	12.9	575	180	3	8.7587	0.68	0.267	12	7.8	1.34	162.937	TRUE	FALSE	FALSE	1.518
108.013	34.2975	陕西省	咸阳	13	550	188	3	7.4	0.9	0.267	12	7.8	1.49	162.937	TRUE	FALSE	FALSE	1.94
108.013	34.2975	陕西省	咸阳	12.9	575	0	3	8.7587	0.68	0.267	12	7.8	1.34	162.937	TRUE	FALSE	FALSE	0.0773
108.013	34.2975	陕西省	咸阳	12.9	575	0	3	8.7587	0.68	0.267	12	7.8	1.34	162.937	FALSE	FALSE	TRUE	0.0822
108.013	34.2975	陕西省	咸阳	13	550	0	3	7.4	0.9	0.267	12	7.8	1.49	162.937	FALSE	FALSE	TRUE	0.3
108.013	34.2975	陕西省	咸阳	13	550	0	3	7.4	0.9	0.267	12	7.8	1.49	162.937	TRUE	FALSE	FALSE	0.3
108.013	34.2975	陕西省	咸阳	13	550	0	3	7.4	0.9	0.267	12	7.8	1.49	162.937	TRUE	FALSE	FALSE	0.44
108.013	34.2975	陕西省	咸阳	13	550	0	3	7.4	0.9	0.267	12	7.8	1.49	162.937	FALSE	FALSE	TRUE	0.44
108.013	34.2986	陕西省	咸阳	12.9	575	165	3	8.7587	0.85	0.267	12	7.8	1.41	162.937	FALSE	FALSE	TRUE	0.71
108.013	34.2986	陕西省	咸阳	12.9	575	0	3	8.7587	0.85	0.267	12	7.8	1.41	162.937	FALSE	FALSE	TRUE	0.19
108.013	34.2986	陕西省	咸阳	12.9	575	0	3	8.7587	0.85	0.267	12	7.8	1.41	162.937	TRUE	FALSE	FALSE	0.24
108.083	34.3	陕西省	咸阳	12.9	660	157.5	3	7.79	0.58	0.2153	11	8.26	1.54	162	TRUE	FALSE	FALSE	0.64
108.083	34.3	陕西省	咸阳	12.9	660	180	3	7.79	0.58	0.215282	11	8.26	1.54	161.614	FALSE	FALSE	TRUE	0.41
108.083	34.3	陕西省	咸阳	12.9	660	225	3	7.79	0.58	0.215282	11	8.26	1.54	161.614	TRUE	FALSE	FALSE	1.27
108.083	34.3	陕西省	咸阳	12.9	660	225	3	7.72	0.58	0.215282	11	8.26	1.41	161.614	TRUE	FALSE	FALSE	1.9
108.083	34.3	陕西省	咸阳	12.9	660	225	3	7.72	0.58	0.215282	11	8.26	1.41	161.614	TRUE	FALSE	FALSE	1.99
108.083	34.3	陕西省	咸阳	12.9	650	300	3	8.06265	0.83	0.22	11	7.8	1.41	161.614	FALSE	FALSE	TRUE	3.8
108.4	34.3	陕西省	咸阳	13.7	570	200	3	5.97448	1.09	0.139685	12	8.3	1.4	177.138	TRUE	FALSE	FALSE	1.02
108.4	34.3	陕西省	咸阳	13.7	560	200	3	5.97448	1.09	0.139685	12	8.3	1.44	177.138	TRUE	FALSE	FALSE	1.18
108.4	34.3	陕西省	咸阳	13.7	560	200	3	5.97448	1.09	0.139685	12	8.3	1.44	177.138	TRUE	FALSE	FALSE	2.24
108.4	34.3	陕西省	咸阳	13.7	570	0	3	5.97448	1.09	0.139685	12	8.3	1.4	177.138	TRUE	FALSE	FALSE	0.34
108.4	34.3	陕西省	咸阳	13.7	570	0	3	5.97448	1.09	0.139685	12	8.3	1.4	177.138	TRUE	FALSE	FALSE	0.42
108.005	34.3003	陕西省	咸阳	12.9	550	220	3	9.91879	0.93	0.32	12	7.44	1.41	165.526	FALSE	FALSE	TRUE	0.37
108.005	34.3003	陕西省	咸阳	12.9	550	220	3	9.91879	0.93	0.32	12	7.44	1.41	165.526	FALSE	FALSE	TRUE	0.67
108.005	34.3003	陕西省	咸阳	12.9	550	0	3	9.91879	0.93	0.32	12	7.44	1.41	165.526	FALSE	FALSE	TRUE	0.13
108.005	34.3003	陕西省	咸阳	12.9	550	0	3	9.91879	0.93	0.32	12	7.44	1.41	165.526	FALSE	FALSE	TRUE	0.21
108.005	34.3003	陕西省	咸阳	12.9	550	0	3	9.91879	0.93	0.32	12	7.44	1.41	165.526	FALSE	FALSE	TRUE	0.29
108.104	34.3113	陕西省	咸阳	13	563.1	144	3	7.71462	0.9	0.258	12	8	1.3	163	FALSE	FALSE	TRUE	0.2
108.104	34.3113	陕西省	咸阳	13	563.1	144	3	7.71462	0.9	0.258	12	8	1.3	163	FALSE	FALSE	TRUE	0.26
108.104	34.3113	陕西省	咸阳	13	563.1	144	3	7.71462	0.9	0.258	12	8	1.3	163	FALSE	FALSE	TRUE	0.27
108.104	34.3113	陕西省	咸阳	13	563.1	144	3	7.71462	0.9	0.258	12	8	1.3	163	FALSE	FALSE	TRUE	0.38
108.104	34.3113	陕西省	咸阳	13	563.1	180	3	7.71462	0.9	0.258	12	8	1.3	162.967	FALSE	FALSE	TRUE	0.22
108.104	34.3113	陕西省	咸阳	13	563.1	180	3	7.71462	0.9	0.258	12	8	1.3	162.967	FALSE	FALSE	TRUE	0.33
108.104	34.3113	陕西省	咸阳	13	563.1	0	3	7.71462	0.9	0.258	12	8	1.3	162.967	FALSE	FALSE	TRUE	0.09
108.104	34.3113	陕西省	咸阳	13	563.1	0	3	7.71462	0.9	0.258	12	8	1.3	162.967	FALSE	FALSE	TRUE	0.11
108.104	34.3113	陕西省	咸阳	13	563.1	0	3	7.71462	0.9	0.258	12	8	1.3	162.967	FALSE	FALSE	TRUE	0.11
108.104	34.3113	陕西省	咸阳	13	563.1	0	3	7.71462	0.9	0.258	12	8	1.3	162.967	FALSE	FALSE	TRUE	0.14
108.067	34.3333	陕西省	咸阳	12.9	635.55	225	3	11.5	1.01	0.221	12	8.07	1.39	170.36	TRUE	FALSE	FALSE	1.281
108.067	34.3333	陕西省	咸阳	12.9	635.55	0	3	11.5	1.01	0.221	12	8.07	1.39	170.36	TRUE	FALSE	FALSE	0.139
108.4	34.3333	陕西省	咸阳	12	561.1	200	3	5.97448	1.09	0.255	12	8.3	1.41	183.816	TRUE	FALSE	FALSE	0.99
108.4	34.3333	陕西省	咸阳	12	561.1	200	3	5.97448	1.09	0.255	12	8.3	1.41	183.816	TRUE	FALSE	FALSE	1.54
108.4	34.3333	陕西省	咸阳	12	561.1	200	3	5.97448	0.92	0.255	12	8.14	1.41	183.816	TRUE	FALSE	FALSE	3.2
108.167	34.35	陕西省	咸阳	12.9	650	241	3	8.17285	1.03	0.365	12	7.58	1.41372	171.39	FALSE	FALSE	TRUE	0.463
108.167	34.35	陕西省	咸阳	12.9	650	241	3	8.17285	1.03	0.365	12	7.58	1.41372	171.39	FALSE	FALSE	TRUE	2.333
108.167	34.35	陕西省	咸阳	12	637	226.5	2	12.65	1.24	0.255	12	7.89	1.41	171.39	FALSE	FALSE	TRUE	2.34
107.79	35.21	陕西省	咸阳	10.7	574	250	3	6.84	0.8	0.21	16	8	1.41	76	TRUE	FALSE	FALSE	2.5
107.79	35.21	陕西省	咸阳	10.7	574	250	3	6.84	0.8	0.21	16	8	1.41	76	TRUE	FALSE	FALSE	2.6
107.79	35.21	陕西省	咸阳	10.7	574	250	3	6.84	0.8	0.21	16	8	1.41	76	TRUE	FALSE	FALSE	3.1
107.79	35.21	陕西省	咸阳	10.7	574	270	3	6.84455	0.8	0.21	16	8	1.41	76	TRUE	FALSE	FALSE	2.2
126.8	45.8167	黑龙江省	哈尔滨	26.5	550	150	3	18.2715	2.1	0.23144	20	6.2992	1.29208	26.2853	FALSE	TRUE	FALSE	4.316
126.8	45.8167	黑龙江省	哈尔滨	26.5	550	150	3	18.2715	2.1	0.23144	20	6.2992	1.29208	26.2853	FALSE	TRUE	FALSE	4.438
126.8	45.8167	黑龙江省	哈尔滨	26.5	550	0	3	18.2715	2.1	0.23144	20	6.2992	1.29208	26.2853	FALSE	TRUE	FALSE	1.711
126.8	45.8167	黑龙江省	哈尔滨	26.5	550	0	3	18.2715	2.1	0.23144	20	6.2992	1.29208	26.2853	FALSE	TRUE	FALSE	2.042
126.815	45.8289	黑龙江省	哈尔滨	3.6	486.4	165	4	16.6473	1.14	0.24	11	6.85	1.41	27.3743	TRUE	FALSE	FALSE	6.092
126.816	45.829	黑龙江省	哈尔滨	3.6	515	165	4	16.6473	1.14	0.24	11	6.85	1.36519	27.3743	TRUE	FALSE	FALSE	1.292
126.816	45.829	黑龙江省	哈尔滨	3.6	515	0	4	16.6473	1.14	0.24	11	6.85	1.36519	27.3743	TRUE	FALSE	FALSE	0.4203
126.866	45.8429	黑龙江省	哈尔滨	3.5	533	0	3	17.384	1.94	0.351	11	6.89	1.41	31.5337	TRUE	FALSE	FALSE	0.22
126.817	45.8557	黑龙江省	哈尔滨	3.5	533	185	3	18.6775	1.9	0.21	11	7.1	1.41	27.5448	TRUE	FALSE	FALSE	0.94
126.817	45.8557	黑龙江省	哈尔滨	3.5	533	0	3	18.6775	1.9	0.21	11	7.1	1.41	27.5448	TRUE	FALSE	FALSE	0.32
132.017	46.6833	黑龙江省	双鸭山	4.6	508	200	4	19.6	1.44	0.38	17	6.5	1.19	38.0569	TRUE	FALSE	FALSE	2.48
132.017	46.6833	黑龙江省	双鸭山	4.6	508	200	4	19.6	1.44	0.38	17	6.5	1.19	38.0569	TRUE	FALSE	FALSE	3.51
132.017	46.6833	黑龙江省	双鸭山	4.6	508	0	4	19.6	1.44	0.38	17	6.5	1.19	38.0569	TRUE	FALSE	FALSE	0.43
132.017	46.6833	黑龙江省	双鸭山	4.6	508	0	4	19.6	1.44	0.38	17	6.5	1.19	38.0569	TRUE	FALSE	FALSE	0.78
126.633	47.4333	黑龙江省	绥化	1.5	550	113	3	28	2.2	0.4	20	7	1.3	54	TRUE	FALSE	FALSE	0.85
126.633	47.4333	黑龙江省	绥化	1.5	550	0	3	28	2.2	0.4	20	7	1.3	54	FALSE	FALSE	TRUE	0.14
126.633	47.4333	黑龙江省	绥化	1.5	550	0	3	28	2.2	0.4	20	7	1.3	54	TRUE	FALSE	FALSE	0.53
126.633	47.4333	黑龙江省	绥化	1.5	550	0	3	28.63	2.07	0.23	20	5.9	1	54	TRUE	FALSE	FALSE	0.64

## Sheet: NH3
Longitude	Latitude	Province	Prefecture	Tem	Pre	rate	n	SOC	TN	Clay	CEC	pH	BD	irrigation	Maize	Rice	Wheat	NH3
121.75	30.87	上海市	奉贤	26.4	456	375	3	7.5406	1.47	0.2025	11	7.9	1.39	170	FALSE	TRUE	FALSE	161.25
121.017	31.0167	上海市	青浦	17.6	1269.3	300	3	13.5731	1.26	0.183	10	7.2	1.27	271.669	FALSE	TRUE	FALSE	136.86
121.117	31.2	上海市	青浦	17.7	1034.5	300	3	13.5209	1.2	0.162	11	7.02	1.37	337.261	FALSE	TRUE	FALSE	55.96
121.133	31.2	上海市	青浦	16.7	1000	300	3	13.5209	1.2	0.245	10	7.02	1.37	334.889	FALSE	TRUE	FALSE	39.26
121.117	31.2	上海市	青浦	17.7	1034.5	0	3	13.5209	1.2	0.162	11	7.02	1.37	337.261	FALSE	TRUE	FALSE	20.32
121.133	31.2	上海市	青浦	16.7	1000	0	3	13.5209	1.2	0.245	10	7.02	1.37	334.889	FALSE	TRUE	FALSE	20.32
121.133	31.2	上海市	青浦	16.7	1000	0	3	13.5209	1.2	0.245	10	7.02	1.37	334.889	FALSE	TRUE	FALSE	18.29
121.3	31.25	上海市	嘉定	15.5	1100	180	3	20.3074	2.75	0.162	8.1	6.78	1.23	179.835	FALSE	TRUE	FALSE	14
121.017	31.0167	上海市	青浦	17.6	1269.3	0	3	13.5731	1.26	0.183	10	7.2	1.27	271.669	FALSE	TRUE	FALSE	6.59
121.75	30.87	上海市	奉贤	26.4	456	0	3	7.5406	1.47	0.2025	11	7.9	1.39	170	FALSE	TRUE	FALSE	6.5
121.3	31.25	上海市	嘉定	15.5	1100	0	3	20.3074	2.75	0.162	8.1	6.78	1.23	179.835	FALSE	TRUE	FALSE	4
100.174	25.8928	云南省	大理	14.6	908.8	195	3	33.2367	3.31	0.23	21.1	7.1	1.41	22.0901	FALSE	TRUE	FALSE	42.52
100.175	25.8933	云南省	大理	14.6	908.8	156	3	33.24	3.31	0.23	21.1	7.1	1.41	22	FALSE	TRUE	FALSE	22.73
100.063	26.0325	云南省	大理	15.3	1048	135	3	46.4153	4.54	0.23	13	7.46	1.58	12.1716	FALSE	TRUE	FALSE	22.39
100.174	25.8928	云南省	大理	14.6	908.8	0	3	33.2367	3.31	0.23	21.1	7.1	1.41	22.0901	FALSE	TRUE	FALSE	11.12
100.063	26.0325	云南省	大理	15.3	1048	0	3	46.4153	4.54	0.23	13	7.46	1.58	12.1716	FALSE	TRUE	FALSE	4.83
108.591	40.9824	内蒙古自治区	巴彦淖尔	5.35	225	375	4	8.46868	0.500838	0.32	13	8.3	1.30704	54.9402	TRUE	FALSE	FALSE	56.84
106.567	40.4333	内蒙古自治区	巴彦淖尔	7.9	136.5	487.5	3	7.42	0.8	0.05	6	8.2	1.41	75	FALSE	FALSE	TRUE	42.51
107.049	40.428	内蒙古自治区	巴彦淖尔	7.6	142.6	320	3	6.73	0.76	0.21	11	8.2	1.41	33.2872	TRUE	FALSE	FALSE	32.99
107.049	40.428	内蒙古自治区	巴彦淖尔	7.6	142.6	320	3	6.73	0.76	0.21	11	8.2	1.41	33.2872	TRUE	FALSE	FALSE	32.21
107.049	40.428	内蒙古自治区	巴彦淖尔	7.6	142.6	240	3	6.73	0.76	0.21	11	8.2	1.41	33	TRUE	FALSE	FALSE	26.05
107.049	40.428	内蒙古自治区	巴彦淖尔	7.6	142.6	240	3	6.73	0.76	0.21	11	8.2	1.41	33	TRUE	FALSE	FALSE	24.15
106.567	40.4333	内蒙古自治区	巴彦淖尔	5	128	456	3	4.3	1.63	0.05	6	8.2	1.4	78	TRUE	FALSE	FALSE	21.07
106.567	40.4333	内蒙古自治区	巴彦淖尔	5	128	456	3	4.3	1.63	0.05	6	8.2	1.4	78	TRUE	FALSE	FALSE	19.84
107.16	40.8716	内蒙古自治区	巴彦淖尔	7.7	137	240	3	7.56381	1.07	0.227	13	8.4	1.3	76.6341	TRUE	FALSE	FALSE	17.84
106.567	40.4333	内蒙古自治区	巴彦淖尔	5	128	345	3	4.3	1.63	0.05	6	8.2	1.4	78	FALSE	FALSE	TRUE	17.09
107.16	40.8723	内蒙古自治区	巴彦淖尔	7.7	137	240	3	8.14385	1.43	0.227	11	8.2	1.41	76.6341	TRUE	FALSE	FALSE	16.05
107.3	40.6833	内蒙古自治区	巴彦淖尔	6.8	143	270	3	5.08034	0.594755	0.32	13	8	1.39	55.5951	TRUE	FALSE	FALSE	14.2
120.5	42.1333	内蒙古自治区	赤峰	5	428	210	3	7.07657	1.11	0.175	13	7.4	1.5	151	FALSE	TRUE	FALSE	13.6
120.5	42.1333	内蒙古自治区	赤峰	5	428	210	3	7.07657	1.11	0.175	13	7.4	1.5	151	FALSE	TRUE	FALSE	12.08
107.3	40.6833	内蒙古自治区	巴彦淖尔	6.8	143	0	3	5.08034	0.594755	0.32	13	8	1.39	55.5951	TRUE	FALSE	FALSE	6.14
108.591	40.9824	内蒙古自治区	巴彦淖尔	5.35	225	0	4	8.46868	0.500838	0.32	13	8.3	1.30704	54.9402	TRUE	FALSE	FALSE	5.81
107.049	40.428	内蒙古自治区	巴彦淖尔	7.6	142.6	0	3	6.73	0.76	0.21	11	8.2	1.41	33.2872	TRUE	FALSE	FALSE	5.02
107.049	40.428	内蒙古自治区	巴彦淖尔	7.6	142.6	0	3	6.73	0.76	0.21	11	8.2	1.41	33.2872	TRUE	FALSE	FALSE	3.58
116.3	39.5	北京市	大兴	11.5	524	300	3	12.413	1.18	0.159	14	8	1.33	203.492	TRUE	FALSE	FALSE	80
116.3	39.5	北京市	大兴	11.5	524	300	3	12.413	1.18	0.159	14	8	1.33	203.492	FALSE	FALSE	TRUE	45.1
116	39.6	北京市	房山	11.6	687	300	3	9.22274	0.93	0.1976	6	8.3	1.36	164.301	TRUE	FALSE	FALSE	30.38
116.3	39.5	北京市	大兴	11.5	524	83.7	3	12.413	1.18	0.159	14	8	1.33	203.49	TRUE	FALSE	FALSE	27.9
116.2	40.1333	北京市	海淀	12	460	312	4	6.2645	0.6	0.04	8.7	7.7	1.4	90.8088	TRUE	FALSE	FALSE	27.8
116.289	40.0311	北京市	海淀	12	619	240	5	4.65918	0.69637	0.18	14	8.11	1.23	81.8634	TRUE	FALSE	FALSE	20
116.2	40.1333	北京市	海淀	12	460	240	4	6.2645	0.6	0.04	8.7	7.7	1.4	90.8088	FALSE	FALSE	TRUE	17.4
115.993	39.6543	北京市	房山	11.6	687	240	3	15.1392	0.406681	0.06	6	7	1.40243	142.955	TRUE	FALSE	FALSE	16.5
116	39.6	北京市	房山	11.6	687	150	3	9.22274	0.93	0.1976	6	8.3	1.36	164	TRUE	FALSE	FALSE	15.21
116.2	40.1333	北京市	海淀	12	460	312	4	6.2645	0.6	0.04	8.7	7.7	1.4	90.8088	TRUE	FALSE	FALSE	15.2
116	39.6	北京市	房山	11.6	687	300	3	9.22274	0.93	0.1976	6	8.3	1.36	164.301	FALSE	FALSE	TRUE	14.87
116.3	39.5	北京市	大兴	11.5	524	34	3	12.413	1.18	0.159	14	8	1.33	203.49	FALSE	FALSE	TRUE	14.4
116.289	40.0311	北京市	海淀	12	619	240	5	4.65918	0.69637	0.18	14	8.11	1.23	81.8634	FALSE	FALSE	TRUE	13
116.23	40.22	北京市	昌平	11.5	625	240	3	8.39327	0.89	0.253	6	8.2	1.32	200	TRUE	FALSE	FALSE	11.61
116.23	40.22	北京市	昌平	11.5	625	240	3	8.39327	0.89	0.253	6	8.2	1.32	200	TRUE	FALSE	FALSE	10.381
116.23	40.22	北京市	昌平	11.5	625	240	3	8.39327	0.89	0.253	6	8.2	1.32	200	TRUE	FALSE	FALSE	9.703
116	39.6	北京市	房山	11.6	687	150	3	9.22274	0.93	0.1976	6	8.3	1.36	164	FALSE	FALSE	TRUE	9.46
116.289	40.0311	北京市	海淀	12	619	0	5	4.65918	0.69637	0.18	14	8.11	1.23	81.8634	TRUE	FALSE	FALSE	8.4
116.289	40.0311	北京市	海淀	12	619	0	3	15.5	1.43	0.18	14	8.2	1.32	181	TRUE	FALSE	FALSE	8.4
116	39.6	北京市	房山	11.6	687	0	3	9.22274	0.93	0.1976	6	8.3	1.36	164.301	TRUE	FALSE	FALSE	4.75
116.289	40.0311	北京市	海淀	12	619	0	5	4.65918	0.69637	0.18	14	8.11	1.23	81.8634	FALSE	FALSE	TRUE	4.4
116.289	40.0311	北京市	海淀	12	619	0	3	15.5	1.43	0.18	14	8.2	1.32	181	FALSE	FALSE	TRUE	4.4
116.497	40.3869	北京市	怀柔	14.5	700	240	3	9	0.765342	0.169	16	8	1.41	51.9217	TRUE	FALSE	FALSE	3.78
116.233	40.2167	北京市	昌平	11.5	625	150	3	6.6	0.7	0.202	6	8.2	1.2	125	FALSE	FALSE	TRUE	3.7
116	39.6	北京市	房山	11.6	687	0	3	9.22274	0.93	0.1976	6	8.3	1.36	164.301	FALSE	FALSE	TRUE	3.01
115.993	39.6543	北京市	房山	11.6	687	0	3	15.1392	0.406681	0.06	6	7	1.40243	142.955	TRUE	FALSE	FALSE	2.36
116.23	40.22	北京市	昌平	11.5	625	0	3	8.39327	0.89	0.253	6	8.2	1.32	209	TRUE	FALSE	FALSE	1.69
116.23	40.22	北京市	昌平	11.5	625	0	3	8.39327	0.89	0.253	6	8.2	1.32	200	TRUE	FALSE	FALSE	1.653
116.23	40.22	北京市	昌平	11.5	625	0	3	8.39327	0.89	0.253	6	8.2	1.32	200	TRUE	FALSE	FALSE	1.653
116.23	40.22	北京市	昌平	11.5	625	0	3	8.39327	0.89	0.253	6	8.2	1.32	209	TRUE	FALSE	FALSE	1.61
116.23	40.22	北京市	昌平	11.5	625	0	3	8.39327	0.89	0.253	6	8.2	1.32	200	TRUE	FALSE	FALSE	1.229
116.23	40.22	北京市	昌平	11.5	625	0	3	8.39327	0.89	0.253	6	8.2	1.32	209	TRUE	FALSE	FALSE	1.19
116.233	40.2167	北京市	昌平	11.5	625	0	3	6.6	0.7	0.202	6	8.2	1.2	125	FALSE	FALSE	TRUE	0.4
116.233	40.2167	北京市	昌平	11.5	625	0	3	7.9	0.8	0.202	6	8.7	1.2	125	FALSE	FALSE	TRUE	0.4
116.497	40.3869	北京市	怀柔	14.5	700	0	3	9	0.765342	0.169	16	8	1.41	51.9217	TRUE	FALSE	FALSE	0.38
124.883	43.5667	吉林省	长春	4.5	525	180	3	14.9014	1.34	0.265	20	5.45	1.37	60	TRUE	FALSE	FALSE	59.97
124.433	43.2833	吉林省	四平	5.9	572.8	233	3	13.109	1.19	0.142	13	6.87	1.43	61	TRUE	FALSE	FALSE	53.43
124.296	43.4821	吉林省	四平	6	577.2	224	4	10.2	1.18	0.25	23	7.88	1.43	30.3364	TRUE	FALSE	FALSE	41.51
124.883	43.5667	吉林省	长春	4.5	525	0	3	14.9014	1.34	0.265	20	5.45	1.37	60	TRUE	FALSE	FALSE	40.07
123.833	45.5833	吉林省	白城	4.3	431.7	150	3	11.1601	2.38	0.25	17	7.91	1.42	62	FALSE	TRUE	FALSE	36.72
124.442	43.286	吉林省	四平	5.8	577	200	3	10.3248	0.72	0.142	13	5.29	1.43	61	TRUE	FALSE	FALSE	36.48
123.833	45.5833	吉林省	白城	4.3	431.7	150	3	7.56381	1.48	0.25	17	8.39	1.42	62	FALSE	TRUE	FALSE	34.95
124.442	43.286	吉林省	四平	5.8	577	250	3	10.3248	0.72	0.142	13	5.29	1.43	61	TRUE	FALSE	FALSE	30.11
124.442	43.286	吉林省	四平	5.8	577	200	3	10.3248	0.72	0.142	13	5.29	1.43	61	TRUE	FALSE	FALSE	27.93
124.442	43.286	吉林省	四平	5.8	577	0	3	10.3248	0.72	0.142	13	5.29	1.43	61	TRUE	FALSE	FALSE	27.39
125.4	43.8	吉林省	长春	5	570.3	240	3	17.15	1.68	0.23	20	6.63	1.24	23.8732	TRUE	FALSE	FALSE	23.4
124.442	43.286	吉林省	四平	5.8	577	250	3	10.3248	0.72	0.142	13	5.29	1.43	61	TRUE	FALSE	FALSE	21.47
124.442	43.286	吉林省	四平	5.8	577	0	3	10.3248	0.72	0.142	13	5.29	1.43	61	TRUE	FALSE	FALSE	21.12
124.296	43.4821	吉林省	四平	6	577.2	0	4	10.2	1.18	0.25	23	7.88	1.43	30.3364	TRUE	FALSE	FALSE	20.97
123.833	45.5833	吉林省	白城	4.3	431.7	0	3	11.1601	2.38	0.25	17	7.91	1.42	62	FALSE	TRUE	FALSE	17.18
123.833	45.5833	吉林省	白城	4.3	431.7	0	3	7.56381	1.48	0.25	17	8.39	1.42	62	FALSE	TRUE	FALSE	15.91
125.413	43.8233	吉林省	长春	5	603	225	3	12.935	1.56	0.23	20	7.08	1.24	24.5056	TRUE	FALSE	FALSE	11.8128
125.4	43.8	吉林省	长春	5	570.3	0	3	17.15	1.68	0.23	20	6.63	1.24	23.8732	TRUE	FALSE	FALSE	8.5
123.367	43.5167	吉林省	四平	7.5	675	0	3	13.72	1.22	0.035	6	7.75	1.4	43	FALSE	TRUE	FALSE	1.57
125.413	43.8233	吉林省	长春	5	603	0	3	12.935	1.56	0.23	20	7.08	1.24	24.5056	TRUE	FALSE	FALSE	0.1498
104.57	30.0867	四川省	资阳	16.8	831.86	150	3	5.35963	0.55	0.449	12	7.91	1.3	50.0727	FALSE	TRUE	FALSE	68.54
105.467	31.2667	四川省	绵阳	17.3	826	150	3	4.81	0.7	0.21	17	8.3	1.38	26.6953	TRUE	FALSE	FALSE	65.8
105.467	31.2667	四川省	绵阳	17.3	826	175	3	5.86	0.7	0.21	17	7.8	1.35	26.6953	TRUE	FALSE	FALSE	59.7
103.734	30.9503	四川省	成都	15.2	1200	180	3	16.47	1.87	0.21	11	6.98	1.42	104.545	FALSE	TRUE	FALSE	52.5
105.467	31.2667	四川省	绵阳	17.3	826	150	3	5.86	0.7	0.21	17	7.8	1.35	26.6953	TRUE	FALSE	FALSE	47.3
105.067	30.175	四川省	资阳	16	1025	220	3	7.5	0.86	0.164	17	8.52	1.37	79	FALSE	TRUE	FALSE	42.11
105.067	30.175	四川省	资阳	16	1025	220	3	7.5	0.82	0.296	26.3	8.15	1.37	79	FALSE	FALSE	TRUE	33.56
104.57	30.0867	四川省	资阳	16.8	965.8	150	3	5.4	0.55	0.2	12	7.91	1.41	50.0727	FALSE	TRUE	FALSE	32.66
105.467	31.2667	四川省	绵阳	17.3	826	150	3	6.35	0.55	0.129	17	8.3	1.32	80	TRUE	FALSE	FALSE	32.2
106.467	31.2833	四川省	南充	17.3	826	150	3	4.21	0.25	0.391	11	8	1.39	65.0557	TRUE	FALSE	FALSE	24
105.067	30.175	四川省	资阳	16	1025	0	3	7.5	0.86	0.164	17	8.52	1.37	79	FALSE	TRUE	FALSE	14.91
105.467	31.2667	四川省	绵阳	17.3	826	0	3	4.81	0.7	0.21	17	8.3	1.38	26.6953	TRUE	FALSE	FALSE	14.2149
106.467	31.2833	四川省	南充	17.3	824	130	3	6.35	0.55	0.192	11	8.3	1.32	65.0557	TRUE	FALSE	FALSE	13.5
103.734	30.9503	四川省	成都	15.2	1200	0	3	16.47	1.87	0.21	11	6.98	1.42	104.545	FALSE	TRUE	FALSE	13.16
105.067	30.175	四川省	资阳	16	1025	0	3	7.5	0.82	0.296	26.3	8.15	1.37	79	FALSE	FALSE	TRUE	12.22
105.467	31.2667	四川省	绵阳	17.3	826	130	3	5.86	0.7	0.21	17	7.8	1.35	26.6953	FALSE	FALSE	TRUE	11.4
105.45	31.2667	四川省	绵阳	17.3	826	150	3	6.57193	0.75	0.215	17	8.36	1.54	56	TRUE	FALSE	FALSE	9.9
105.467	31.2667	四川省	绵阳	17.3	826	130	3	5.86	0.7	0.21	17	7.8	1.35	26.6953	FALSE	FALSE	TRUE	9.7
103.067	34.1333	四川省	阿坝	9.1	280	300	3	5.1004	0.95	0.23	14	7.69979	1.52998	42	TRUE	FALSE	FALSE	9.32231
105.467	31.2667	四川省	绵阳	17.3	826	90	3	5.49884	0.7	0.129	17	8.51	1.41	35	TRUE	FALSE	FALSE	8.88
105.45	31.2667	四川省	绵阳	17.3	826	130	3	6.57193	0.75	0.215	17	8.36	1.54	56	FALSE	FALSE	TRUE	8.5
105.467	31.2667	四川省	绵阳	17.3	826	0	3	6.35	0.55	0.129	17	8.3	1.32	80	TRUE	FALSE	FALSE	8.5
103.001	29.9839	四川省	雅安	14	1763	180	3	10.1	0.9	0.21	11	6.8	1.22	25.1894	TRUE	FALSE	FALSE	7.82645
105.467	31.2667	四川省	绵阳	17.3	826	130	3	5.49884	0.7	0.129	17	8.51	1.41	35	FALSE	FALSE	TRUE	7.78
105.467	31.2667	四川省	绵阳	17.3	826	0	3	6.35	0.55	0.129	17	8.3	1.32	80	FALSE	FALSE	TRUE	7.2
104.57	30.0867	四川省	资阳	16.8	965.8	0	3	5.4	0.55	0.2	12	7.91	1.41	50.0727	FALSE	TRUE	FALSE	6.68
106.467	31.2833	四川省	南充	17.3	824	130	3	6.35	0.55	0.192	11	8.3	1.32	65.0557	FALSE	FALSE	TRUE	5.2
103.001	29.9839	四川省	雅安	14	1763	135	3	10.1	0.9	0.21	11	6.8	1.22	25	TRUE	FALSE	FALSE	4.58
104.57	30.0867	四川省	资阳	16.8	831.86	0	3	5.35963	0.55	0.449	12	7.91	1.3	50.0727	FALSE	TRUE	FALSE	3.93
103.067	34.1333	四川省	阿坝	9.1	280	0	3	5.1004	0.95	0.23	14	7.69979	1.52998	42	TRUE	FALSE	FALSE	3.22314
106.467	31.2833	四川省	南充	17.3	826	130	3	4.21	0.25	0.391	11	8	1.39	65.0557	FALSE	FALSE	TRUE	2.91
103.001	29.9839	四川省	雅安	14	1763	0	3	10.1	0.9	0.21	11	6.8	1.22	25.1894	TRUE	FALSE	FALSE	1.90909
106.467	31.2833	四川省	南充	17.3	826	0	3	4.21	0.25	0.391	11	8	1.39	65.0557	FALSE	FALSE	TRUE	0.76
106.467	31.2833	四川省	南充	17.3	826	0	3	4.21	0.25	0.391	11	8	1.39	65.0557	TRUE	FALSE	FALSE	0.75
116.933	39.1	天津市	西青	11.6	586.1	400	3	15.8933	1.276	0.261	13	8.4	1.26	103.576	FALSE	FALSE	TRUE	8.916
116.989	39.0868	天津市	西青	12	550	300	3	10.8469	2.1	0.128	14	8.4	1.32	97.7291	FALSE	FALSE	TRUE	7.619
106.267	38.1333	宁夏回族自治区	银川	8.9	192.9	300	3	8.63	1.09	0.21	11	8.58	1.57	62.6968	FALSE	TRUE	FALSE	94.1
106.267	38.1333	宁夏回族自治区	银川	8	190	300	3	8.12065	0.99	0.18	11	8.5	1.4	103	FALSE	TRUE	FALSE	74.71
106.267	38.1333	宁夏回族自治区	银川	8.9	192.9	240	3	8.63	1.09	0.21	11	8.58	1.57	63	FALSE	TRUE	FALSE	71.4
106.267	38.1333	宁夏回族自治区	银川	8.9	192.9	240	3	8.63	1.09	0.21	11	8.58	1.6	63	FALSE	TRUE	FALSE	71.4
106.267	38.1333	宁夏回族自治区	银川	8	190	240	3	8.12065	0.99	0.18	11	8.5	1.4	103	FALSE	TRUE	FALSE	58.62
106.8	35.85	宁夏回族自治区	固原	8.1	410.2	285	3	8.2	1.07	0.151	16	7.59	1.33	120	TRUE	FALSE	FALSE	44.9
106.8	35.85	宁夏回族自治区	固原	8.1	410.2	285	3	8.2	1.07	0.151	16	7.59	1.33	120	TRUE	FALSE	FALSE	37.8
106.8	35.85	宁夏回族自治区	固原	8.1	410.2	285	3	8.2	1.07	0.151	16	7.59	1.33	120	TRUE	FALSE	FALSE	34.9
106.267	38.1333	宁夏回族自治区	银川	8	190	300	3	8.12065	0.99	0.18	11	8.5	1.4	103	FALSE	TRUE	FALSE	31.82
106.267	38.1333	宁夏回族自治区	银川	8.9	192.9	0	3	8.63	1.09	0.21	11	8.58	1.57	62.6968	FALSE	TRUE	FALSE	27.6
106.267	38.1333	宁夏回族自治区	银川	8.9	192.9	0	3	8.62529	1.09	0.21	11	8.58	1.6	62.6968	FALSE	TRUE	FALSE	27.6
106.8	35.85	宁夏回族自治区	固原	8.1	410.2	285	3	8.2	1.07	0.151	16	7.59	1.33	120	TRUE	FALSE	FALSE	27.5
106.267	38.1333	宁夏回族自治区	银川	8	190	240	3	8.12065	0.99	0.18	11	8.5	1.4	103	FALSE	TRUE	FALSE	27.27
106.267	38.1333	宁夏回族自治区	银川	8	190	0	3	8.12065	0.99	0.18	11	8.5	1.4	103	FALSE	TRUE	FALSE	9.19
106.267	38.1333	宁夏回族自治区	银川	8	190	0	3	8.12065	0.99	0.18	11	8.5	1.4	103	FALSE	TRUE	FALSE	5.68
119.517	31.1167	安徽省	宣城	15.7	1177	120	3	16.6	1.49	0.116	10.9	6	1.44	116.771	FALSE	TRUE	FALSE	112.646
119.517	31.1167	安徽省	宣城	15.7	1333	240	3	13.2251	1.56	0.059	19.6	6.36	1.44	116.771	FALSE	TRUE	FALSE	71.23
117.867	32.55	安徽省	滁州	15.3	960	195	3	13.5151	1.27	0.21	11	6.6	1.40783	168.456	FALSE	TRUE	FALSE	69.53
117.68	31.6658	安徽省	合肥	16.8	1360	225	3	19.9304	1.3	0.49	11	6.18	1.41	165.887	FALSE	TRUE	FALSE	58.36
119.083	31.0333	安徽省	宣城	17.2	1490	270	3	11.2	2.8	0.244	11	5.39	1.41	167.904	FALSE	TRUE	FALSE	54.34
119.517	31.1167	安徽省	宣城	15.7	1333	200	3	13.2251	1.56	0.059	19.6	6.36	1.44	116.771	FALSE	TRUE	FALSE	53.15
117.776	31.6539	安徽省	合肥	16.1	1158	240	3	12.8654	1.23	0.323	11	6.6	1.41	186.061	FALSE	TRUE	FALSE	47.74
117.68	31.6658	安徽省	合肥	16.8	1360	225	3	19.9304	1.3	0.49	11	6.18	1.41	165.887	FALSE	TRUE	FALSE	46.22
117.417	32.45	安徽省	滁州	15.3	998	240	3	12.181	1.8	0.262	11	7.8	1.41	188.264	FALSE	FALSE	TRUE	45.3
117.68	31.6658	安徽省	合肥	16.8	1360	225	3	19.9304	1.3	0.49	11	6.18	1.41	165.887	FALSE	TRUE	FALSE	40.55
117.867	32.55	安徽省	滁州	15.2	962	195	3	10.96	1.1	0.21	11	6.5	1.4	168.456	FALSE	TRUE	FALSE	40.27
119.517	31.1167	安徽省	宣城	15.7	1333	120	3	13.2251	1.56	0.059	19.6	6.36	1.44	116.771	FALSE	FALSE	TRUE	38.57
117.164	30.3639	安徽省	池州	13.2	803.7	218	3	5.40023	0.968	0.614	11	7.01	1.41	117.815	TRUE	FALSE	FALSE	37
117.417	32.45	安徽省	滁州	15.3	998	0	3	12.181	1.8	0.262	11	7.8	1.41	188.264	FALSE	FALSE	TRUE	36.6
119.517	31.1167	安徽省	宣城	15.7	1333	160	3	13.2251	1.56	0.059	19.6	6.36	1.44	116.771	FALSE	TRUE	FALSE	33.97
119.517	31.1167	安徽省	宣城	15.7	1333	180	3	13.2251	1.56	0.059	19.6	6.36	1.44	116.771	FALSE	FALSE	TRUE	22.42
117.156	31.8978	安徽省	合肥	15	1003	150	3	11.5429	1.11	0.473	11	6.2	1.41	232.395	FALSE	TRUE	FALSE	17.65
117.417	32.45	安徽省	滁州	15.3	998	0	3	12.181	1.8	0.262	11	7.8	1.41	188.264	TRUE	FALSE	FALSE	16.8
117.417	32.45	安徽省	滁州	15.3	998	240	3	12.181	1.8	0.262	11	7.8	1.41	188.264	TRUE	FALSE	FALSE	16.6
117.156	31.8978	安徽省	合肥	15	1003	150	3	11.5429	1.11	0.473	11	6.2	1.41	232.395	FALSE	TRUE	FALSE	15.89
117.767	31.65	安徽省	合肥	15	1114	214	3	19.76	1.58	0.21	11	6.99	1.73	182.475	FALSE	TRUE	FALSE	15.24
117.767	31.65	安徽省	合肥	15	1114	158	3	19.76	1.58	0.21	11	6.99	1.73	182	FALSE	TRUE	FALSE	9.93
119.517	31.1167	安徽省	宣城	15.7	1333	150	3	13.2251	1.56	0.059	19.6	6.36	1.44	116.771	FALSE	FALSE	TRUE	8.94
119.517	31.1167	安徽省	宣城	15.7	1177	180	3	16.6	1.49	0.116	10.9	6	1.44	116.771	FALSE	FALSE	TRUE	7.938
117.68	31.6658	安徽省	合肥	16.8	1360	0	3	19.9304	1.3	0.49	11	6.18	1.41	165.887	FALSE	TRUE	FALSE	7.04
117.68	31.6658	安徽省	合肥	16.8	1360	0	3	19.9304	1.3	0.49	11	6.18	1.41	165.887	FALSE	TRUE	FALSE	6.63
117.68	31.6658	安徽省	合肥	16.8	1360	0	3	19.9304	1.3	0.49	11	6.18	1.41	165.887	FALSE	TRUE	FALSE	5.92
117.156	31.8978	安徽省	合肥	15	1003	0	3	11.5429	1.11	0.473	11	6.2	1.41	232.395	FALSE	TRUE	FALSE	5.24
117.156	31.8978	安徽省	合肥	15	1003	0	3	11.5429	1.11	0.473	11	6.2	1.41	232.395	FALSE	TRUE	FALSE	4.69
117.867	32.55	安徽省	滁州	15.3	960	0	3	13.5151	1.27	0.21	11	6.6	1.40783	168.456	FALSE	TRUE	FALSE	4.33
117.867	32.55	安徽省	滁州	15.2	962	0	3	10.96	1.1	0.21	11	6.5	1.4	168.456	FALSE	TRUE	FALSE	2.35
117.767	31.65	安徽省	合肥	15	1114	0	3	19.76	1.58	0.21	11	6.99	1.73	182.475	FALSE	TRUE	FALSE	1.04
117.15	36.15	山东省	泰安	12.8	700	180	3	8.12645	1.21	0.153	16	7.28	1.54	103.509	FALSE	FALSE	TRUE	52.99
117.15	36.15	山东省	泰安	12.8	697	180	3	6.57773	0.76	0.24	16	7.33	1.39	103.509	FALSE	FALSE	TRUE	52.84
117.15	36.15	山东省	泰安	12.8	702	200	3	7.9	0.62	0.153	16	7.13	1.54	103.509	TRUE	FALSE	FALSE	52.58
117.15	36.15	山东省	泰安	12.8	700	180	3	6.50232	0.7	0.153	16	7.28	1.54	103.509	FALSE	FALSE	TRUE	46.04
117.15	36.15	山东省	泰安	12.8	700	180	3	8.12645	1.21	0.153	16	7.28	1.54	103.509	FALSE	FALSE	TRUE	45.85
117.15	36.15	山东省	泰安	12.8	700	218	3	8.12645	1.21	0.24	16	7.29	1.39	103.509	FALSE	FALSE	TRUE	45.85
117.169	36.178	山东省	泰安	13	700	300	4	4.83	0.3	0.24	16	7.89	1.39	219	FALSE	FALSE	TRUE	45.41
117.15	36.15	山东省	泰安	12.8	702	200	3	7.9	0.62	0.153	16	7.13	1.54	103.509	TRUE	FALSE	FALSE	44.75
117.15	36.15	山东省	泰安	12.8	697	180	3	6.33991	0.72	0.24	16	7.3	1.39	103.509	FALSE	FALSE	TRUE	44.02
116.322	37.4603	山东省	德州	12.9	547.5	315	3	7.63921	0.8	0.214	13	8.54	1.3	137.317	FALSE	FALSE	TRUE	41.46
117.15	36.15	山东省	泰安	12.8	700	180	3	6.50232	0.7	0.153	16	7.28	1.54	103.509	FALSE	FALSE	TRUE	41.13
117.15	36.15	山东省	泰安	12.8	700	218	3	6.5	0.7	0.24	16	7.28	1.39	103.509	FALSE	FALSE	TRUE	41.13
117.151	36.1542	山东省	泰安	12	715	200	3	4.75638	0.62	0.14	16	7.3	1.54	103.509	FALSE	TRUE	FALSE	40.4
117.15	36.15	山东省	泰安	12	718	200	3	7.88863	1.4	0.153	16	7.2	1.2	103.509	TRUE	FALSE	FALSE	40
117.15	36.15	山东省	泰安	12	717	200	3	7.09977	0.97	0.24	16	7.31	1.39	103.509	TRUE	FALSE	FALSE	39.96
117.15	36.15	山东省	泰安	12.8	697	180	3	5.83527	0.63	0.24	16	7.24	1.39	103.509	FALSE	FALSE	TRUE	39.59
117.15	36.15	山东省	泰安	12	718	180	3	6.2587	0.77	0.153	16	7.3	1.1	103.509	FALSE	FALSE	TRUE	37.6
117.2	36.2833	山东省	泰安	12	697	180	3	5.86427	0.61	0.158	13	7.3	1.43	207	FALSE	FALSE	TRUE	37.57
116.567	36.8333	山东省	德州	13.4	569.6	225	3	7.33179	0.73	0.063	10	8.69	1.36	358.28	TRUE	FALSE	FALSE	36.74
117.15	36.15	山东省	泰安	12	717	200	3	7.47	0.95	0.24	16	7.28	1.39	103.509	TRUE	FALSE	FALSE	36.43
117.15	36.15	山东省	泰安	12	718	200	3	7.88863	1.4	0.153	16	7.2	1.2	103.509	TRUE	FALSE	FALSE	36.4
117.15	36.15	山东省	泰安	12	718	180	3	6.2587	0.77	0.153	16	7.3	1.1	103.509	FALSE	FALSE	TRUE	35.2
117.15	36.15	山东省	泰安	12	697	200	3	6.5	0.94	0.153	16	7.3	1.54	103.509	TRUE	FALSE	FALSE	34.64
117.151	36.1542	山东省	泰安	12	715	200	3	4.75638	0.62	0.14	16	7.3	1.54	103.509	FALSE	TRUE	FALSE	34.4
117.833	36.9333	山东省	滨州	12.5	558	250	3	10.7309	0.96	0.475	6	7.71	1.52	192.043	TRUE	FALSE	FALSE	33.4
117.15	36.15	山东省	泰安	12.8	697	180	3	6.00348	0.68	0.24	16	7.26	1.39	103.509	FALSE	FALSE	TRUE	33.14
117.15	36.15	山东省	泰安	12.8	702	180	3	7.9	0.62	0.153	16	7.13	1.54	103.509	FALSE	FALSE	TRUE	32.69
117.169	36.178	山东省	泰安	12	725	300	4	5.86	0.36	0.24	16	8.51	1.39	219	TRUE	FALSE	FALSE	32.57
117.2	36.2833	山东省	泰安	12	697	180	3	6.33991	0.69	0.158	13	7.3	1.43	207	FALSE	FALSE	TRUE	31.43
117.15	36.15	山东省	泰安	12	718	200	2	6.2587	0.77	0.153	16	7.3	1.1	103.509	TRUE	FALSE	FALSE	30.85
120.383	37.6167	山东省	烟台	11.7	620.3	276	3	7.51	0.78	0.21	16	7.25245	1.4	126.285	FALSE	FALSE	TRUE	29.72
117.15	36.15	山东省	泰安	12.8	702	180	3	7.9	0.62	0.153	16	7.13	1.54	103.509	FALSE	FALSE	TRUE	28.78
118.017	37.3667	山东省	滨州	12.7	564.8	226.5	3	7.94664	0.9	0.128	16	7.2	1.36	124.136	TRUE	FALSE	FALSE	28.59
117.15	36.15	山东省	泰安	12	718	200	2	6.2587	0.77	0.153	16	7.3	1.1	103.509	TRUE	FALSE	FALSE	28.58
117.15	36.15	山东省	泰安	12	697	180	3	5.78886	0.59	0.153	16	7.3	1.54	103.509	FALSE	FALSE	TRUE	27.66
117.987	36.9625	山东省	淄博	12.5	587	345	3	10.0928	0.8	0.329	6	7.7	1.44	186.305	FALSE	FALSE	TRUE	27.4
116.322	37.4601	山东省	德州	12.9	547.5	315	3	7.63921	0.8	0.32	13	8.59	1.36784	137.317	FALSE	FALSE	TRUE	26
117.169	36.178	山东省	泰安	13	700	300	4	4.83	0.3	0.24	16	7.89	1.39	219	FALSE	FALSE	TRUE	20.05
117.833	36.9333	山东省	滨州	12.5	558	0	3	10.7309	0.96	0.475	6	7.71	1.52	192.043	TRUE	FALSE	FALSE	18.5
117.169	36.178	山东省	泰安	12	725	225	3	4.54	0.89	0.24	16	6.29074	1.39	219	FALSE	FALSE	TRUE	17.79
117.833	36.9333	山东省	滨州	12.5	558	250	3	10.9049	1.05	0.475	6	7.71	1.52	192.043	FALSE	FALSE	TRUE	16.55
118.017	37.3667	山东省	滨州	12.7	564.8	226.5	3	7.94664	0.9	0.128	16	7.2	1.36	124.136	FALSE	FALSE	TRUE	16.08
117.169	36.178	山东省	泰安	13.5	700	240	3	6.81	0.91	0.24	16	6.15	1.25	219	TRUE	FALSE	FALSE	15.4
117.987	36.9625	山东省	淄博	12.5	587	345	3	10.0928	0.8	0.329	6	7.7	1.44	186.305	TRUE	FALSE	FALSE	15.1
117.169	36.178	山东省	泰安	13	700	240	3	6.8	0.91	0.24	16	6.15	1.25	219	TRUE	FALSE	FALSE	14.62
116.322	37.4601	山东省	德州	12.9	547.5	255	3	7.63921	0.8	0.32	13	8.59	1.36784	137.317	TRUE	FALSE	FALSE	13.91
117.15	36.15	山东省	泰安	12.8	697	0	3	6.57773	0.76	0.24	16	7.33	1.39	103.509	FALSE	FALSE	TRUE	13.28
117.833	36.9333	山东省	滨州	12.5	558	0	3	10.9049	1.05	0.475	6	7.71	1.52	192.043	FALSE	FALSE	TRUE	12.26
117.15	36.15	山东省	泰安	12	718	0	3	7.88863	1.4	0.153	16	7.2	1.2	103.509	TRUE	FALSE	FALSE	11.1
117.15	36.15	山东省	泰安	12	717	0	3	7.09977	0.97	0.24	16	7.31	1.39	103.509	TRUE	FALSE	FALSE	11.09
117.169	36.178	山东省	泰安	12	725	302.4	3	11.43	1.11	0.24	16	6.1	1.39	219	TRUE	FALSE	FALSE	10.5974
117.169	36.178	山东省	泰安	13	700	0	4	4.83	0.3	0.24	16	7.89	1.39	219	FALSE	FALSE	TRUE	7.98
117.169	36.178	山东省	泰安	12	725	0	4	5.86	0.36	0.24	16	8.51	1.39	219	TRUE	FALSE	FALSE	7.52
117.15	36.15	山东省	泰安	12	717	0	3	7.47	0.95	0.24	16	7.28	1.39	103.509	TRUE	FALSE	FALSE	7.5
117.15	36.15	山东省	泰安	12	718	0	3	7.88863	1.4	0.153	16	7.2	1.2	103.509	TRUE	FALSE	FALSE	7.5
117.15	36.15	山东省	泰安	12.8	697	0	3	6.33991	0.72	0.24	16	7.3	1.39	103.509	FALSE	FALSE	TRUE	6.13
117.169	36.178	山东省	泰安	13	700	225	3	7.16	0.69	0.24	16	6.88	1.39	219	TRUE	FALSE	FALSE	6.05
117.15	36.15	山东省	泰安	12.8	697	0	3	5.83527	0.63	0.24	16	7.24	1.39	103.509	FALSE	FALSE	TRUE	5.31
117.15	36.15	山东省	泰安	12.8	697	0	3	6.00348	0.68	0.24	16	7.26	1.39	103.509	FALSE	FALSE	TRUE	4.33
117.169	36.178	山东省	泰安	13.5	700	0	3	6.81	0.91	0.24	16	6.15	1.25	219	TRUE	FALSE	FALSE	3.6
120.383	37.6167	山东省	烟台	11.7	620.3	0	3	7.51	0.78	0.21	16	7.25245	1.4	126.285	FALSE	FALSE	TRUE	3.17
116.567	36.8333	山东省	德州	13.4	569.6	225	3	7.33179	0.73	0.063	10	8.69	1.36	358.28	FALSE	FALSE	TRUE	2.89
117.169	36.178	山东省	泰安	13	700	0	3	6.8	0.91	0.24	16	6.15	1.25	219	TRUE	FALSE	FALSE	2.25
117.169	36.178	山东省	泰安	13	700	0	4	4.83	0.3	0.24	16	7.89	1.39	219	TRUE	FALSE	FALSE	1.58
116.567	36.8333	山东省	德州	13.4	569.6	0	3	7.33179	0.73	0.063	10	8.69	1.36	358.28	FALSE	FALSE	TRUE	0.2
116.567	36.8333	山东省	德州	13.4	569.6	0	3	7.33179	0.73	0.063	10	8.69	1.36	358.28	TRUE	FALSE	FALSE	0.13
112.2	36.9667	山西省	长治	6	477	150	4	10.5568	1.2	0.06	15	7.7	1.41	117	FALSE	FALSE	TRUE	38
112.2	36.9667	山西省	长治	6	477	240	4	10.5568	1.2	0.06	15	7.7	1.41	117	FALSE	FALSE	TRUE	27
112.2	36.9667	山西省	长治	6	477	150	4	10.5568	1.2	0.06	15	7.7	1.41	117	FALSE	FALSE	TRUE	16
113.126	37.9655	山西省	晋中	6	487	150	3	6.49994	0.175127	0.21	16	8	1.38	135	TRUE	FALSE	FALSE	13.2
113.126	37.9655	山西省	晋中	6	487	150	3	6.49994	0.175127	0.21	16	8	1.38	135	TRUE	FALSE	FALSE	6.07
113.126	37.9655	山西省	晋中	6	487	0	3	6.49994	0.175127	0.21	16	8	1.38	135	TRUE	FALSE	FALSE	5.15
113.126	37.9655	山西省	晋中	6	487	0	3	6.49994	0.175127	0.21	16	8	1.38	135	TRUE	FALSE	FALSE	5.15
115.907	23.3539	广东省	揭阳	17.8	1662	180	3	15.3	1.5	0.25	6	5.24	1.07	52.5119	FALSE	TRUE	FALSE	75.33
115.907	23.3539	广东省	揭阳	17.8	1662	180	3	15.3	1.5	0.25	6	5.24	1.07	52.5119	FALSE	TRUE	FALSE	72.73
113.333	23.1333	广东省	广州	21	1701	210	3	23.96	1.62	0.21	16	6	1.4	82.2157	FALSE	TRUE	FALSE	46.5
113.333	23.1333	广东省	广州	21	1701	180	3	23.96	1.62	0.21	16	6	1.4	82.2157	FALSE	TRUE	FALSE	44.9
113.333	23.1333	广东省	广州	21	1703	150	3	23.96	1.62	0.21	16	6	1.36	82	FALSE	TRUE	FALSE	36.4
113.333	23.1333	广东省	广州	21	1701	150	3	23.96	1.62	0.21	16	6	1.4	82	FALSE	TRUE	FALSE	36.4
113.333	23.1333	广东省	广州	21	1701	150	3	23.96	1.62	0.21	16	6	1.4	82	FALSE	TRUE	FALSE	35.2
113.333	23.1333	广东省	广州	21	1703	180	3	23.96	1.62	0.21	16	6	1.36	82	FALSE	TRUE	FALSE	31.7
113.333	23.1333	广东省	广州	21	1701	180	3	23.96	1.62	0.21	16	6	1.4	82	FALSE	TRUE	FALSE	31.7
113.333	23.1333	广东省	广州	21	1701	180	3	23.96	1.62	0.21	16	6	1.4	82	FALSE	TRUE	FALSE	31
113.333	23.1333	广东省	广州	21	1703	0	3	23.9559	1.62	0.21	16	6	1.36	82.2157	FALSE	TRUE	FALSE	16.5
113.333	23.1333	广东省	广州	21	1701	0	3	23.96	1.62	0.21	16	6	1.4	82.2157	FALSE	TRUE	FALSE	16.5
113.333	23.1333	广东省	广州	21	1703	0	3	23.9559	1.62	0.21	16	6	1.36	82.2157	FALSE	TRUE	FALSE	8.99
113.333	23.1333	广东省	广州	21	1701	0	3	23.96	1.62	0.21	16	6	1.4	82.2157	FALSE	TRUE	FALSE	8.99
115.907	23.3539	广东省	揭阳	17.8	1662	0	3	15.3	1.5	0.25	6	5.24	1.07	52.5119	FALSE	TRUE	FALSE	5.03
115.907	23.3539	广东省	揭阳	17.8	1662	0	3	15.3	1.5	0.25	6	5.24	1.07	52.5119	FALSE	TRUE	FALSE	0.9
108.189	23.1966	广西壮族自治区	南宁	21.6	1304.2	172.5	3	3.17216	1.3	0.46	9	6	1.26	44.7684	FALSE	TRUE	FALSE	22.91
108.189	23.1966	广西壮族自治区	南宁	21.6	1304.2	169.1	3	3.17216	1.3	0.46	9	6	1.26	44.7684	FALSE	TRUE	FALSE	20.048
108.189	23.1966	广西壮族自治区	南宁	21.6	1304.2	0	3	3.17216	1.3	0.46	9	6	1.26	44.7684	FALSE	TRUE	FALSE	3.88
108.189	23.1966	广西壮族自治区	南宁	21.6	1304.2	0	3	3.17216	1.3	0.46	9	6	1.26	44.7684	FALSE	TRUE	FALSE	0.756
87.7792	44.5906	新疆维吾尔自治区	乌鲁木齐	7.7	310	241.5	6	8.25406	0.97	0.05	6	8.06	1.5	65	FALSE	FALSE	TRUE	3.03
87.7792	44.5906	新疆维吾尔自治区	乌鲁木齐	7.7	310	241.5	3	8.38167	0.79	0.084	8	8.24	1.7	82	FALSE	FALSE	TRUE	2.81
87.7792	44.5906	新疆维吾尔自治区	乌鲁木齐	7.7	310	0	6	8.25406	0.97	0.05	6	8.06	1.5	65	FALSE	FALSE	TRUE	0.49
87.7792	44.5906	新疆维吾尔自治区	乌鲁木齐	7.7	310	0	3	8.38167	0.79	0.084	8	8.24	1.7	82	FALSE	FALSE	TRUE	0.49
86.0167	44.4417	新疆维吾尔自治区	塔城	7	216	300	3	14.69	0.68	0.18	14	8	1.37	60	FALSE	TRUE	FALSE	0.4
86.0167	44.4417	新疆维吾尔自治区	塔城	7	216	0	3	14.69	0.68	0.18	14	8	1.37	60	FALSE	TRUE	FALSE	0.06
120.962	31.2542	江苏省	苏州	15.5	1097	403.3	3	17.58	1.79	0.21	11	7.4	1.41	216.844	FALSE	FALSE	TRUE	145.64
120.974	31.2692	江苏省	苏州	15.5	1097.1	403.35	3	12.0078	2.04229	0.24	10	4.56876	1.32	238.265	FALSE	TRUE	FALSE	125.27
120.699	31.5458	江苏省	苏州	15	1090	300	3	20	1.79	0.44	20.2	7.36	1.22	341.105	FALSE	TRUE	FALSE	112.68
119.504	31.9938	江苏省	镇江	14	1051	225	3	13.2193	1.41	0.17	10	6.62	1.26	225.888	FALSE	TRUE	FALSE	96.4
120.4	32.5833	江苏省	南通	14.5	1025	270	3	14.6752	1.39	0.219	11	6.53	1.41	238.544	FALSE	TRUE	FALSE	90
120.4	32.5833	江苏省	南通	14.5	1025	270	3	14.6752	1.39	0.219	11	6.53	1.41	238.544	FALSE	TRUE	FALSE	87.5
120.41	31.32	江苏省	苏州	14.9	1054	300	3	20.4176	2.05	0.202	6	7.4	1.43	146.291	FALSE	TRUE	FALSE	83.71
120.699	31.5458	江苏省	苏州	15	1090	270	3	25.87	2.73	0.44	10	7.15	1.26	341.105	FALSE	TRUE	FALSE	80.76
120.817	32.6167	江苏省	盐城	14	1057	300	3	12.4	1.22	0.18	14	7.46	1.7	264	FALSE	TRUE	FALSE	77.6
119.472	31.9086	江苏省	镇江	17.5	1056	216	3	11.4849	1.26	0.17	10	6.4	1.26	227.917	FALSE	TRUE	FALSE	77.2
119.9	31.2833	江苏省	无锡	15	1279	270	3	9.73742	1.07889	0.21	11	7.85585	1.43	164.874	FALSE	TRUE	FALSE	76.06
120.1	31.5167	江苏省	常州	14	950	270	3	18.6	2.88	0.21	11	6.99	1.41	187.09	FALSE	TRUE	FALSE	75.9
120.1	31.5167	江苏省	常州	15.7	1177	270	3	18.56	1.88	0.21	11	6.99	1.41	187.09	FALSE	TRUE	FALSE	75.86
120.1	31.5167	江苏省	常州	14	950	270	3	18.5615	2.88	0.21	11	6.99	1.41	187.09	FALSE	TRUE	FALSE	75.85
118.875	32.0337	江苏省	南京	15.4	1106.5	300	3	10.6148	1.03	0.112	20	6.38	1.28	164.111	FALSE	TRUE	FALSE	75.4158
120.708	31.5592	江苏省	苏州	15.5	1038	300	3	20.3016	2.01	0.299	17.7	7.35	1.27	347.079	FALSE	TRUE	FALSE	73.3
120.962	31.2542	江苏省	苏州	15.5	1100	324.6	3	12.703	1.03	0.132	11	7.8	1.41	216.844	FALSE	TRUE	FALSE	71.7
119.867	31.25	江苏省	无锡	16	1100	225	3	18.8515	2.27	0.132	11	6.3	1.41	165.648	FALSE	TRUE	FALSE	70.92
119.42	32.3921	江苏省	扬州	14	1042	300	2	6.68	0.55	0.207	7	7.43	1.27	182.954	FALSE	TRUE	FALSE	70.81
120.41	31.32	江苏省	苏州	15.4	1054	270	3	20.3016	2.09	0.1	6	7.3	1.41992	146.291	FALSE	TRUE	FALSE	69.84
120.962	31.2542	江苏省	苏州	15.5	1100	302.7	3	12.703	1.03	0.132	11	7.8	1.41	216.844	FALSE	TRUE	FALSE	68.2
119.465	31.9052	江苏省	镇江	15	1064	270	3	13.4571	1.125	0.17	10	6.31	1.26	227.917	FALSE	TRUE	FALSE	68.02
120.117	31.5424	江苏省	无锡	15	1123	270	3	20.68	1.81	0.21	11	7.8	1.41	209.944	FALSE	TRUE	FALSE	67.5
119.472	31.9086	江苏省	镇江	17.5	1056	0	3	11.4849	1.26	0.17	10	6.4	1.26	227.917	FALSE	TRUE	FALSE	65.7
119.9	31.2667	江苏省	无锡	15.7	1177	240	3	14.5	1.56	0.08	12.3	6.25	1.27	157.512	FALSE	TRUE	FALSE	63.9
120.7	31.55	江苏省	苏州	15.7	1177	240	3	15.4	1.79	0.102	11.8	5.6	1.27	345.989	FALSE	TRUE	FALSE	63.5
119.467	32.5333	江苏省	扬州	15.5	1019	300	4	14.62	1.8	0.26	14	5.3	1.37	212.726	FALSE	FALSE	TRUE	62.99
120.1	31.5167	江苏省	常州	14	950	210	3	18.6	2.88	0.21	11	6.99	1.41	187	FALSE	TRUE	FALSE	60.5
120.1	31.5167	江苏省	常州	14	950	210	3	18.56	2.88	0.21	11	6.99	1.41	187	FALSE	TRUE	FALSE	60.46
119.42	32.3921	江苏省	扬州	14	1042	270	3	5.8	0.35	0.207	7	6.8	1.27	182.954	FALSE	TRUE	FALSE	59.98
120.1	31.5167	江苏省	常州	14	950	153	3	18.56	2.88	0.21	11	6.99	1.41	187	FALSE	TRUE	FALSE	58.57
120.962	31.2542	江苏省	苏州	15.5	1100	324.6	3	12.703	1.03	0.132	11	7.8	1.41	216.844	FALSE	TRUE	FALSE	58.4
120.68	31.53	江苏省	苏州	15	1100	220	3	20.3	2.1	0.24	10	7.4	1.1	342.158	FALSE	TRUE	FALSE	56.42
119.465	31.9052	江苏省	镇江	15	1064	270	3	13.4571	1.125	0.17	10	6.31	1.26	227.917	FALSE	TRUE	FALSE	55.64
119.42	32.3921	江苏省	扬州	14	1042	300	2	9.76	0.76	0.207	7	7.19	1.27	182.954	FALSE	TRUE	FALSE	55.26
120.962	31.2542	江苏省	苏州	15.5	1100	302.7	3	12.703	1.03	0.132	11	7.8	1.41	216.844	FALSE	TRUE	FALSE	54.2
120.8	31.2	江苏省	苏州	16	1139	280	4	20.26	1.82	0.21	11	5.3	1.25	133.612	FALSE	TRUE	FALSE	53.11
120.698	31.5458	江苏省	苏州	15.5	1038	270	3	20.3016	2.09	0.299	17.7	7.36	1.27	341.105	FALSE	TRUE	FALSE	53.1
120.699	31.5458	江苏省	苏州	15	1089	270	4	20.3016	2.09	0.299	17.7	7.36	1.27	341.105	FALSE	TRUE	FALSE	52.9
120.117	31.5424	江苏省	无锡	15	1123	210	3	20.68	1.81	0.21	11	7.8	1.41	210	FALSE	TRUE	FALSE	52.5
119.7	32.919	江苏省	扬州	14	1021	300	3	14.5012	2.4	0.221	11	7.5	1.28	178.101	TRUE	FALSE	FALSE	51.8
120.699	31.5458	江苏省	苏州	15.5	1038	300	4	20.3	2.09	0.44	17.7	7.36	1.26	341.105	FALSE	TRUE	FALSE	51.58
119.42	32.3921	江苏省	扬州	14	1042	270	3	5.8	0.45	0.207	7	6.8	1.27	182.954	FALSE	TRUE	FALSE	51.21
118.875	32.0337	江苏省	南京	15	1058	270	3	9.8	0.949552	0.112	20	6.3	1.28	164.111	FALSE	TRUE	FALSE	50.66
120.1	31.5167	江苏省	常州	14	950	153	3	18.6	2.88	0.21	11	6.99	1.41	187	FALSE	TRUE	FALSE	50.2
120.1	31.5167	江苏省	常州	15.7	1177	153	3	18.56	1.88	0.21	11	6.99	1.41	187	FALSE	TRUE	FALSE	49.88
120.962	31.2542	江苏省	苏州	15.5	1038	300	4	35	2.09	0.326	20.2	7.36	1.2	216.844	FALSE	FALSE	TRUE	49.44
120.962	31.2542	江苏省	苏州	15.5	1038	300	4	26.6	2.09	0.319	17.7	7.35	1.41	216.844	FALSE	TRUE	FALSE	49.4
120.699	31.5458	江苏省	苏州	15.5	1038	300	4	20.3	2.09	0.44	17.7	7.36	1.26	341.105	FALSE	TRUE	FALSE	49.2
120.708	31.5592	江苏省	苏州	17.04	1344.8	270	4	26.6	2.83	0.319	10	6.99	1.26242	347.079	FALSE	TRUE	FALSE	49.07
120.962	31.2542	江苏省	苏州	15.5	1100	184.88	3	12.703	1.03	0.132	11	7.8	1.41	216.84	FALSE	TRUE	FALSE	48
120.7	31.55	江苏省	苏州	15.7	1177	240	3	15.4	1.79	0.102	11.8	5.6	1.27	345.989	FALSE	TRUE	FALSE	44
118.85	32.0333	江苏省	南京	16.2	1106	210	3	7.20998	1.75	0.112	20	7.1	1.28	161.873	FALSE	TRUE	FALSE	42.41
118.833	31.8	江苏省	南京	15.9	1106	250	3	15.2	1.4	0.14	23	6.4	1.2704	205.839	FALSE	TRUE	FALSE	41.76
119.9	31.2667	江苏省	无锡	15.7	1250	240	3	13.1671	1.56	0.213	7	6.25	1.27	157.512	FALSE	TRUE	FALSE	41.4
119.183	31.6	江苏省	南京	15	1167	270	3	9.64037	0.9	0.2	11	5.84663	1.41245	172.646	FALSE	TRUE	FALSE	40.2
120.699	31.5458	江苏省	苏州	15	1090	250	3	20	1.79	0.44	20.2	7.36	1.22	341.105	FALSE	FALSE	TRUE	40.1
120.1	31.5167	江苏省	常州	14	950	0	3	18.5615	2.88	0.21	11	6.99	1.41	187.09	FALSE	TRUE	FALSE	40.04
120.1	31.5167	江苏省	常州	15.7	1177	0	3	18.56	1.88	0.21	11	6.99	1.41	187.09	FALSE	TRUE	FALSE	40.02
120.1	31.5167	江苏省	常州	14	950	0	3	18.6	2.88	0.21	11	6.99	1.41	187.09	FALSE	TRUE	FALSE	40
120.962	31.2542	江苏省	苏州	15.5	1100	184.88	3	12.703	1.03	0.132	11	7.8	1.41	216.84	FALSE	TRUE	FALSE	39.6
118.833	31.8667	江苏省	南京	16.4	915.6	250	3	14.6	1.31171	0.39	23	5.7	1.28	216.353	FALSE	TRUE	FALSE	39.07
120.683	31.5333	江苏省	苏州	16.5	1316	240	3	17.8654	1.83	0.331	10	7.4	1.26	342.158	FALSE	TRUE	FALSE	38.1
120.962	31.2542	江苏省	苏州	15.5	1100	198	3	12.703	1.03	0.132	11	7.8	1.41	216.84	FALSE	TRUE	FALSE	37.8
119.2	32.1	江苏省	镇江	15	1200	200	3	18.36	2.11	0.1	6	6.1	1.23	160.505	FALSE	FALSE	TRUE	37.35
119.467	32.5333	江苏省	扬州	15.5	1019	300	4	14.62	1.8	0.26	14	5.3	1.37	212.726	FALSE	FALSE	TRUE	34.6
119.183	31.6	江苏省	南京	15	1167	270	3	9.64037	0.9	0.2	11	5.84663	1.41245	172.646	FALSE	TRUE	FALSE	34.13
118.85	32.0333	江苏省	南京	16.2	1106	210	3	7.20998	1.75	0.112	20	7.1	1.28	161.873	FALSE	TRUE	FALSE	33.82
120.117	31.5424	江苏省	无锡	15	1123	153	3	20.68	1.81	0.21	11	7.8	1.41	210	FALSE	TRUE	FALSE	33.3
120.974	31.2692	江苏省	苏州	15	1116	279	3	17.5754	1.8	0.373	10	7.4	1.26	238.265	FALSE	TRUE	FALSE	32.5
120.962	31.2542	江苏省	苏州	15.5	1038	225	4	35	2.09	0.326	20.2	7.36	1.2	217	FALSE	FALSE	TRUE	30.94
120.962	31.2542	江苏省	苏州	15.5	1038	225	3	20.3016	2.09	0.319	17.7	7.35	1.41	216.844	FALSE	TRUE	FALSE	30.9
120.708	31.5592	江苏省	苏州	17.04	1344.8	270	4	26.6	2.83	0.319	10	6.99	1.26242	347.079	FALSE	TRUE	FALSE	30.85
120.962	31.2542	江苏省	苏州	15.5	1100	198	3	12.703	1.03	0.132	11	7.8	1.41	216.84	FALSE	TRUE	FALSE	30.7
119.2	32.1	江苏省	镇江	15.7	724.3	300	3	10.65	2.11	0.1	6	6.1	1.23	160.505	TRUE	FALSE	FALSE	30.58
118.983	31.95	江苏省	南京	15	1100	200	3	21.09	1.65	0.27	27	7.94	1.18	199.06	FALSE	FALSE	TRUE	30.41
118.983	31.95	江苏省	南京	15	1100	230	3	21.09	1.65	0.27	27	7.94	1.18	199.06	FALSE	FALSE	TRUE	30.3
118.983	31.95	江苏省	南京	15	1100	190	3	21.09	1.65	0.27	27	7.94	1.18	199.06	FALSE	TRUE	FALSE	30.24
118.983	31.95	江苏省	南京	15	1100	270	3	21.09	1.65	0.27	27	7.94	1.18	199.06	FALSE	TRUE	FALSE	30
119.504	31.9938	江苏省	镇江	15.7	741	225	3	13.22	1.41	0.24	10	4.6	1.32	225.888	FALSE	TRUE	FALSE	29.9929
118.833	31.8	江苏省	南京	15.9	1106	250	3	15.2	1.4	0.14	23	6.4	1.2704	205.839	FALSE	TRUE	FALSE	29.98
119.994	32.5397	江苏省	泰州	14.5	1051	240	3	10.6148	1.1	0.293	13	7.1	1.35	268.501	FALSE	FALSE	TRUE	29.79
120.699	31.5458	江苏省	苏州	15.5	1038	270	4	20.3	2.09	0.44	17.7	7.36	1.26	341	FALSE	TRUE	FALSE	29.69
120.962	31.2542	江苏省	苏州	15.5	1038	300	4	35	2.09	0.326	20.2	7.36	1.2	216.844	FALSE	FALSE	TRUE	28.74
120.962	31.2542	江苏省	苏州	15.5	1038	300	4	26.6	2.09	0.319	17.7	7.35	1.41	216.844	FALSE	TRUE	FALSE	28.7
120.698	31.5458	江苏省	苏州	15.5	1038	270	3	20.3016	2.09	0.299	17.7	7.36	1.27	341.105	FALSE	TRUE	FALSE	28.7
119.178	31.9646	江苏省	镇江	14	1070	300	3	5.73	0.68	0.2	11	6.3	1.39	195.121	FALSE	TRUE	FALSE	27.93
120.708	31.5592	江苏省	苏州	15.5	1038	225	4	20.3	2.09	0.44	17.7	7.3	1.32	347.079	FALSE	TRUE	FALSE	27.9
119.867	31.25	江苏省	无锡	16	1100	0	3	18.8515	2.27	0.132	11	6.3	1.41	165.648	FALSE	TRUE	FALSE	27.67
118.833	31.8	江苏省	南京	15.9	1106	250	3	15.2	1.4	0.14	23	6.4	1.2704	205.839	FALSE	FALSE	TRUE	27.16
120.699	31.5458	江苏省	苏州	15.5	1038	270	4	20.3	2.09	0.44	17.7	7.36	1.26	341	FALSE	TRUE	FALSE	26.9
118.983	31.95	江苏省	南京	15	1100	230	3	21.09	1.65	0.27	27	7.94	1.18	199.06	FALSE	TRUE	FALSE	26.71
119.2	32.1	江苏省	镇江	15	1200	270	3	18.36	2.11	0.1	6	6.1	1.23	160.505	FALSE	TRUE	FALSE	26.12
119.504	31.9938	江苏省	镇江	14	1051	225	3	13.2193	1.41	0.17	10	6.62	1.26	225.888	FALSE	TRUE	FALSE	24.7
118.617	31.9333	江苏省	南京	15.6	1107	60	3	7.67401	1.51	0.363	14	6.85	1.39	161.787	FALSE	TRUE	FALSE	23.6
118.85	32.0333	江苏省	南京	16.2	1106	0	3	7.20998	1.75	0.112	20	7.1	1.28	161.873	FALSE	TRUE	FALSE	23.58
118.833	31.8	江苏省	南京	15.9	1106	250	3	15.2	1.4	0.14	23	6.4	1.2704	205.839	FALSE	FALSE	TRUE	23.43
118.983	31.95	江苏省	南京	15	1100	150	3	21.09	1.65	0.27	27	7.94	1.18	199.06	FALSE	FALSE	TRUE	22.81
120.699	31.5458	江苏省	苏州	15.5	1038	225	4	20.3	2.09	0.44	17.7	7.36	1.27	341	FALSE	TRUE	FALSE	22.6
120.699	31.5458	江苏省	苏州	17.8	992.8	240	4	20.3	2.09	0.44	17.7	7.36	1.26	341.105	FALSE	TRUE	FALSE	22.51
120.974	31.2692	江苏省	苏州	15	1116	279	3	17.5754	1.8	0.373	10	7.4	1.26	238.265	FALSE	TRUE	FALSE	22.5
120.962	31.2542	江苏省	苏州	15.5	1038	225	4	35	2.09	0.326	20.2	7.36	1.2	217	FALSE	FALSE	TRUE	22.44
120.962	31.2542	江苏省	苏州	15.5	1038	225	3	20.3016	2.09	0.319	17.7	7.35	1.41	216.844	FALSE	TRUE	FALSE	22.4
118.833	31.8667	江苏省	南京	16.4	915.6	250	3	14.6	1.31171	0.39	23	5.7	1.28	216.353	FALSE	FALSE	TRUE	22.05
118.85	32.0333	江苏省	南京	16.2	1106	0	3	7.20998	1.75	0.112	20	7.1	1.28	161.873	FALSE	TRUE	FALSE	20.9
119.9	31.2667	江苏省	无锡	15.7	1177	240	3	14.5	1.56	0.08	12.3	6.25	1.27	157.512	FALSE	TRUE	FALSE	20.3
120.974	31.2692	江苏省	苏州	17.6	1200.4	120	3	12.5928	1.79	0.146	10	7.66	1.34	238.265	FALSE	TRUE	FALSE	20.2
120.68	31.53	江苏省	苏州	15	1100	0	3	20.3	2.1	0.24	10	7.4	1.1	342.158	FALSE	TRUE	FALSE	19.85
119.986	31.4765	江苏省	无锡	15	1197	240	3	13.2251	1.56	0.21	11	6.38	1.41	190.334	FALSE	TRUE	FALSE	18.65
119.085	32.0004	江苏省	南京	14	1074	240	3	16.87	1.95	0.3934	11	5.93	1.47	182.117	FALSE	TRUE	FALSE	18.14
118.875	32.0337	江苏省	南京	15	1058	0	3	9.8	0.949552	0.112	20	6.3	1.28	164.111	FALSE	TRUE	FALSE	18.02
119.9	31.2667	江苏省	无锡	15.7	1177	225	3	5.8	1.56	0.08	7	6.25	1.27	157.512	FALSE	TRUE	FALSE	17.78
120.974	31.2692	江苏省	苏州	17.6	1200.4	120	3	12.5928	1.79	0.146	10	7.66	1.34	238.265	FALSE	TRUE	FALSE	16.4
120.708	31.5592	江苏省	苏州	17.04	1344.8	0	4	26.6	2.83	0.319	10	6.99	1.26242	347.079	FALSE	TRUE	FALSE	16.36
120.974	31.2692	江苏省	苏州	17.6	1200.4	120	3	10	1.5	0.123	10	7.73	1.36	238.265	FALSE	TRUE	FALSE	15.9
119.986	31.4765	江苏省	无锡	15	1197	240	3	13.2251	1.56	0.21	11	6.38	1.41	190.334	FALSE	TRUE	FALSE	15.85
119.986	31.4765	江苏省	无锡	15	1199	240	3	13.2251	1.56	0.183	11	6.38	1.41	190.334	FALSE	TRUE	FALSE	15.85
119.9	31.2667	江苏省	无锡	15.7	1200	225	3	5.8	1.56	0.08	7	6.25	1.27	157.512	FALSE	TRUE	FALSE	15.5
120.974	31.2692	江苏省	苏州	17.6	1200.4	120	3	10	1.5	0.123	10	7.73	1.36	238.265	FALSE	TRUE	FALSE	15.5
119.983	31.4667	江苏省	无锡	16	1200	0	3	13.2251	1.56	0.183	11	6.38	1.41	183.104	FALSE	FALSE	TRUE	14.87
119.178	31.9646	江苏省	镇江	14	1070	200	3	5.74	0.68	0.2	11	6.3	1.39	195.121	FALSE	FALSE	TRUE	14.2
118.833	31.8	江苏省	南京	15.9	1106	0	3	15.2	1.4	0.14	23	6.4	1.2704	205.839	FALSE	FALSE	TRUE	13.88
120.708	31.5592	江苏省	苏州	17.04	1344.8	0	4	26.6	2.83	0.319	10	6.99	1.26242	347.079	FALSE	TRUE	FALSE	11.76
120.41	31.32	江苏省	苏州	15.4	1054	0	3	20.3016	2.09	0.1	6	7.3	1.41992	146.291	FALSE	TRUE	FALSE	11.03
120.708	31.5592	江苏省	苏州	15.5	1038	225	4	20.3	2.09	0.44	17.7	7.3	1.32	347.079	FALSE	TRUE	FALSE	11
119.994	32.5397	江苏省	泰州	14.5	1051	0	3	10.6148	1.1	0.293	13	7.1	1.35	268.501	FALSE	FALSE	TRUE	10.87
119.7	32.919	江苏省	扬州	14	1021	250	3	14.5012	2.4	0.221	11	7.5	1.28	178.101	FALSE	FALSE	TRUE	10.6
120.117	31.5424	江苏省	无锡	15	1123	0	3	20.68	1.81	0.21	11	7.8	1.41	209.944	FALSE	TRUE	FALSE	10.5
120.683	31.5333	江苏省	苏州	16.5	1316	300	3	14.8492	1.45	0.331	10	5.8	1.26	342.158	FALSE	TRUE	FALSE	10.01
120.974	31.2692	江苏省	苏州	15.5	1097.1	312.69	3	12.5928	1.79	0.373	10	7.4	1.3	238.265	FALSE	TRUE	FALSE	9.66
120.698	31.5458	江苏省	苏州	15.5	1038	210	4	20.3016	2.09	0.299	17.7	7.35	1.27	341.105	FALSE	FALSE	TRUE	9.55
120.7	31.55	江苏省	苏州	15.5	1038	180	3	20.3	2.09	0.44	17.7	7.35	1.26	345.989	FALSE	FALSE	TRUE	9.13
120.699	31.5458	江苏省	苏州	15	1089	0	4	20.3016	2.09	0.299	17.7	7.36	1.27	341.105	FALSE	TRUE	FALSE	9.1
119.2	32.1	江苏省	镇江	15	1200	0	3	18.36	2.11	0.1	6	6.1	1.23	160.505	FALSE	FALSE	TRUE	8.89
118.833	31.8	江苏省	南京	15.9	1106	0	3	15.2	1.4	0.14	23	6.4	1.2704	205.839	FALSE	TRUE	FALSE	8.67
120.699	31.5458	江苏省	苏州	15	1089	190	4	20.3016	2.09	0.299	17.7	7.36	1.27	341.105	FALSE	FALSE	TRUE	8.6
118.833	31.8	江苏省	南京	15.9	1106	0	3	15.2	1.4	0.14	23	6.4	1.2704	205.839	FALSE	TRUE	FALSE	8.14
120.8	31.2	江苏省	苏州	16	1139	150	4	20.26	1.81	0.21	11	5.6	1.25	133.612	FALSE	FALSE	TRUE	7.96
119.085	32.0004	江苏省	南京	14	1074	240	3	16.87	1.95	0.3934	11	5.93	1.47	182.117	FALSE	TRUE	FALSE	7.83
119.2	32.1	江苏省	镇江	15	1200	0	3	18.36	2.11	0.1	6	6.1	1.23	160.505	FALSE	TRUE	FALSE	7.7
120.594	31.6839	江苏省	苏州	15	1081	250	4	14.2691	1.64	0.299	10	5.23	1.26	382.974	FALSE	FALSE	TRUE	7.63
120.6	31.6899	江苏省	苏州	15	1081	250	4	14.27	1.64	0.24	10	5.23	1.32	383.45	FALSE	FALSE	TRUE	7.63
120.699	31.5458	江苏省	苏州	15.5	1038	0	4	20.3016	2.09	0.44	17.7	7.36	1.26662	341.105	FALSE	TRUE	FALSE	7.59
120.699	31.5458	江苏省	苏州	15.5	1038	0	4	20.3	2.09	0.44	17.7	7.36	1.26	341.105	FALSE	TRUE	FALSE	7.59
120.594	31.6839	江苏省	苏州	15	1081	200	4	14.2691	1.64	0.299	10	5.23	1.26	382.97	FALSE	FALSE	TRUE	6.99
120.6	31.6899	江苏省	苏州	15	1081	200	4	14.27	1.64	0.24	10	5.23	1.32	383	FALSE	FALSE	TRUE	6.99
120.8	31.2	江苏省	苏州	16	1139	125	4	20.26	1.81	0.21	11	5.6	1.25	134	FALSE	FALSE	TRUE	6.98
119.178	31.9646	江苏省	镇江	14	1070	0	3	5.73	0.68	0.2	11	6.3	1.39	195.121	FALSE	TRUE	FALSE	6.5
119.467	32.5333	江苏省	扬州	15.5	1019	0	4	14.62	1.8	0.26	14	5.3	1.37	212.726	FALSE	FALSE	TRUE	6.43
120.699	31.5458	江苏省	苏州	15	1090	0	3	20	1.79	0.44	20.2	7.36	1.22	341.105	FALSE	FALSE	TRUE	6.07
119.906	31.2809	江苏省	无锡	16	1250	180	3	13.1671	1.56	0.213	7	6.25	1.27	164.874	FALSE	FALSE	TRUE	5.02
119.178	31.9646	江苏省	镇江	14	1070	200	3	5.74	0.68	0.2	11	6.3	1.39	195.121	FALSE	FALSE	TRUE	4.3
118.833	31.8	江苏省	南京	15.9	1106	0	3	15.2	1.4	0.14	23	6.4	1.2704	205.839	FALSE	FALSE	TRUE	4.26
118.833	31.8	江苏省	南京	15.6	1106.5	0	3	8.81671	1.4	0.39	23	6.4	1.2704	205.839	FALSE	FALSE	TRUE	4.2
118.833	31.8667	江苏省	南京	16.4	915.6	0	3	14.6	1.31171	0.39	23	5.7	1.28	216.353	FALSE	TRUE	FALSE	4.03
119.986	31.4765	江苏省	无锡	15	1197	0	3	13.2251	1.56	0.21	11	6.38	1.41	190.334	FALSE	TRUE	FALSE	3.78
120.962	31.2542	江苏省	苏州	15.5	1038	225	4	35	2.09	0.326	20.2	7.36	1.2	217	FALSE	FALSE	TRUE	3.55
120.6	31.6899	江苏省	苏州	15	1081	0	4	14.27	1.64	0.24	10	5.23	1.32	383.45	FALSE	FALSE	TRUE	3.41
119.183	31.6	江苏省	南京	15	1167	0	3	9.64037	0.9	0.2	11	5.84663	1.41245	172.646	FALSE	TRUE	FALSE	3.21
120.962	31.2542	江苏省	苏州	15.5	1038	0	4	35	2.09	0.326	20.2	7.36	1.2	216.844	FALSE	FALSE	TRUE	3.11
120.962	31.2542	江苏省	苏州	15.5	1038	0	4	26.6	2.09	0.319	17.7	7.35	1.41	216.844	FALSE	TRUE	FALSE	3.1
120.962	31.2542	江苏省	苏州	15.5	1038	0	3	20.3016	2.09	0.319	17.7	7.35	1.41	216.844	FALSE	TRUE	FALSE	3.1
120.699	31.5458	江苏省	苏州	15	1090	0	3	20	1.79	0.44	20.2	7.36	1.22	341.105	FALSE	TRUE	FALSE	3.1
118.833	31.8667	江苏省	南京	16.4	915.6	0	3	14.6	1.31171	0.39	23	5.7	1.28	216.353	FALSE	FALSE	TRUE	2.99
120.699	31.5458	江苏省	苏州	17.8	992.8	0	4	20.3	2.09	0.44	17.7	7.36	1.26	341.105	FALSE	TRUE	FALSE	2.96
120.8	31.2	江苏省	苏州	16	1139	0	4	20.26	1.82	0.21	11	5.3	1.25	133.612	FALSE	TRUE	FALSE	2.85
119.937	31.38	江苏省	无锡	15	1268	0	3	11.2	0.73	0.116	11	7.8	1.41	180.763	FALSE	TRUE	FALSE	2.45
119.986	31.4765	江苏省	无锡	15	1197	0	3	13.2251	1.56	0.21	11	6.38	1.41	190.334	FALSE	TRUE	FALSE	2.45
119.986	31.4765	江苏省	无锡	15	1199	0	3	13.2251	1.56	0.183	11	6.38	1.41	190.334	FALSE	TRUE	FALSE	2.45
120.699	31.5458	江苏省	苏州	15	1089	0	4	20.3016	2.09	0.299	17.7	7.36	1.27	341.105	FALSE	FALSE	TRUE	2.2
120.962	31.2542	江苏省	苏州	15.5	1038	225	4	35	2.09	0.326	20.2	7.36	1.2	217	FALSE	FALSE	TRUE	2.04
119.504	31.9938	江苏省	镇江	15.7	741	0	3	13.22	1.41	0.24	10	4.6	1.32	225.888	FALSE	TRUE	FALSE	1.936
119.183	31.6	江苏省	南京	15	1167	0	3	9.64037	0.9	0.2	11	5.84663	1.41245	172.646	FALSE	TRUE	FALSE	1.93
120.962	31.2542	江苏省	苏州	15.5	1038	0	4	26.6	2.09	0.319	17.7	7.35	1.41	216.844	FALSE	TRUE	FALSE	1.9
120.962	31.2542	江苏省	苏州	15.5	1038	0	3	20.3016	2.09	0.319	17.7	7.35	1.41	216.844	FALSE	TRUE	FALSE	1.9
120.962	31.2542	江苏省	苏州	15.5	1038	0	4	35	2.09	0.326	20.2	7.36	1.2	216.844	FALSE	FALSE	TRUE	1.9
119.467	32.5333	江苏省	扬州	15.5	1019	0	4	14.62	1.8	0.26	14	5.3	1.37	212.726	FALSE	FALSE	TRUE	1.83
120.698	31.5458	江苏省	苏州	15.5	1038	0	4	20.3016	2.09	0.299	17.7	7.35	1.27	341.105	FALSE	FALSE	TRUE	1.42
119.9	31.2667	江苏省	无锡	15.7	1200	0	3	5.8	1.56	0.08	7	6.25	1.27	157.512	FALSE	TRUE	FALSE	1.38
120.8	31.2	江苏省	苏州	16	1139	0	4	20.26	1.81	0.21	11	5.6	1.25	133.612	FALSE	FALSE	TRUE	1.37
120.8	31.2	江苏省	苏州	16	1139	0	4	20.26	1.81	0.132	11	5.6	1.25	134	FALSE	FALSE	TRUE	1.37
120.708	31.5592	江苏省	苏州	15.5	1038	0	4	20.3	2.09	0.44	17.7	7.3	1.32	347.079	FALSE	TRUE	FALSE	1.31405
120.699	31.5458	江苏省	苏州	15.5	1038	0	4	20.3	2.09	0.44	17.7	7.36	1.26	341.105	FALSE	TRUE	FALSE	1.29
120.7	31.55	江苏省	苏州	15.5	1038	0	3	20.3	2.09	0.44	17.7	7.35	1.26	345.989	FALSE	FALSE	TRUE	0.81
119.178	31.9646	江苏省	镇江	14	1070	0	3	5.74	0.68	0.2	11	6.3	1.39	195.121	FALSE	FALSE	TRUE	0.6
119.42	32.3921	江苏省	扬州	14	1042	0	2	9.76	0.76	0.207	7	7.19	1.27	182.954	FALSE	TRUE	FALSE	0.42
119.42	32.3921	江苏省	扬州	14	1042	0	2	6.68	0.55	0.207	7	7.43	1.27	182.954	FALSE	TRUE	FALSE	0.39
120.698	31.5458	江苏省	苏州	15.5	1038	0	3	20.3016	2.09	0.299	17.7	7.36	1.27	341.105	FALSE	TRUE	FALSE	0.3
118.983	31.95	江苏省	南京	15	1076	270	3	12.2332	1.65	0.27	27	7.94	1.18	199.06	FALSE	TRUE	FALSE	0.3
120.708	31.5592	江苏省	苏州	15.5	1038	0	4	20.3	2.09	0.44	17.7	7.3	1.32	347.079	FALSE	TRUE	FALSE	0.25
118.983	31.95	江苏省	南京	15	1076	0	3	12.2332	1.65	0.27	27	7.94	1.18	199.06	FALSE	FALSE	TRUE	0.14
120.698	31.5458	江苏省	苏州	15.5	1038	0	3	20.3016	2.09	0.299	17.7	7.36	1.27	341.105	FALSE	TRUE	FALSE	0.1
118.983	31.95	江苏省	南京	15	1076	0	3	12.2332	1.65	0.27	27	7.94	1.18	199.06	FALSE	TRUE	FALSE	0.1
119.178	31.9646	江苏省	镇江	14	1070	0	3	5.74	0.68	0.2	11	6.3	1.39	195.121	FALSE	FALSE	TRUE	0.1
114.317	28.3167	江西省	宜春	14	1711	240	3	8.46868	1	0.23	12	5.8	1.19061	31.9037	TRUE	FALSE	FALSE	37.67
114.317	28.3167	江西省	宜春	14	1711	240	3	8.46868	1	0.23	12	5.8	1.19061	31.9037	TRUE	FALSE	FALSE	37.47
115.907	28.3533	江西省	南昌	17.8	1662	135	3	11.67	2.06	0.23	13	4.97	1.19	201.485	FALSE	TRUE	FALSE	35.32
114.317	28.3167	江西省	宜春	14	1711	240	3	8.46868	1	0.23	12	5.8	1.19	31.9037	TRUE	FALSE	FALSE	33.88
114.317	28.3167	江西省	宜春	14	1711	240	3	8.46868	1	0.23	12	5.8	1.19061	31.9037	TRUE	FALSE	FALSE	31.01
116	28.4333	江西省	南昌	17.5	1747	180	3	10.05	1.02	0.21	11	6.8	1.34	201.625	FALSE	TRUE	FALSE	29.96
114.317	28.3167	江西省	宜春	14	1711	0	3	8.46868	1	0.23	12	5.8	1.19	31.9037	TRUE	FALSE	FALSE	10.73
116.93	28.202	江西省	鹰潭	17	1695	263.25	3	6.91995	0.8	0.206	6	5.43	1.43	120.606	FALSE	TRUE	FALSE	2.72
116.842	28.2583	江西省	鹰潭	18	1750	250	3	4.72	0.54	0.151	10.6	4.8	1.41794	126.521	FALSE	FALSE	TRUE	1.681
116.93	28.202	江西省	鹰潭	17	1695	0	3	6.91995	0.8	0.206	6	5.43	1.43	120.606	FALSE	TRUE	FALSE	0.97
115.413	38.81	河北省	保定	12	550	391.5	3	6.98956	0.6	0.153	6	8.7	1.4	221.561	TRUE	FALSE	FALSE	95.3
115.857	39.4714	河北省	保定	12	521	300	3	6.98956	1.26	0.1	6	8.7	1.44	139.07	TRUE	FALSE	FALSE	73.3
115.413	38.81	河北省	保定	12	550	285	3	6.98956	0.6	0.153	6	8.7	1.4	221.561	FALSE	FALSE	TRUE	43.5
114.683	37.8833	河北省	石家庄	12.2	536.8	157	3	7.1	0.9	0.09	6	8.2	1.35	365.896	TRUE	FALSE	FALSE	41.8
114.683	37.8833	河北省	石家庄	12.5	536	225	3	9.68677	0.600231	0.17	6	8.5	1.47	365.896	TRUE	FALSE	FALSE	35.85
114.683	37.8833	河北省	石家庄	13	492	200	4	7.55	0.9	0.046	11.3	7.8	1.35	365.896	TRUE	FALSE	FALSE	34.5207
115.857	39.4714	河北省	保定	12	521	225	3	6.98956	1.26	0.1	6	8.7	1.44	139.07	FALSE	FALSE	TRUE	33.3
115.067	38.1333	河北省	石家庄	12.3	575	240	3	11.1949	1	0.09	6	8.6	1.35	348.362	TRUE	FALSE	FALSE	29.34
116.867	38.1667	河北省	沧州	13.4	520	240	3	12.25	0.7	0.128	14	8	1.3	213	TRUE	FALSE	FALSE	27.96
115.533	38.0167	河北省	衡水	12.6	459.7	240	3	6.78654	0.4074	0.06	6	8.6	1.4	180.66	TRUE	FALSE	FALSE	27.8
116.867	38.1667	河北省	沧州	13.4	520	240	3	12.25	0.7	0.128	14	8	1.3	213	TRUE	FALSE	FALSE	25.54
115.533	38.0167	河北省	衡水	12.6	459.7	300	3	6.78654	0.4074	0.06	6	8.6	1.4	180.66	FALSE	FALSE	TRUE	24.92
114.683	37.8833	河北省	石家庄	12.2	536.8	250	3	7.5406	0.9	0.153	11.2	7.8	1.44	365.896	TRUE	FALSE	FALSE	22
114.683	37.8833	河北省	石家庄	12.5	536	280	3	9.68677	0.600231	0.17	6	8.5	1.47	365.896	FALSE	FALSE	TRUE	21.86
116.867	38.1667	河北省	沧州	13.4	520	180	3	12.25	0.7	0.128	14	8	1.3	213	FALSE	FALSE	TRUE	20.68
115.533	38.0167	河北省	衡水	12.6	459.7	168	3	6.79	0.41	0.06	6	8.6	1.4	181	TRUE	FALSE	FALSE	19.46
115.533	38.0167	河北省	衡水	12.6	459.7	210	3	6.79	0.41	0.06	6	8.6	1.4	181	FALSE	FALSE	TRUE	18.69
116.867	38.1667	河北省	沧州	13.4	520	180	3	12.25	0.7	0.128	14	8	1.3	213	FALSE	FALSE	TRUE	18.69
114.683	37.8833	河北省	石家庄	12.2	536.8	240	3	7.1	0.9	0.09	6	8.2	1.35	365.896	FALSE	FALSE	TRUE	18.2975
116.588	39.5964	河北省	廊坊	11.9	554.9	180	3	4.3	0.23	0.18	14	8.2	1.24	236.168	TRUE	FALSE	FALSE	17.3
114.683	37.8833	河北省	石家庄	13	492	200	4	7.55	0.9	0.046	11.3	7.8	1.35	365.896	TRUE	FALSE	FALSE	17.2645
115.067	38.1333	河北省	石家庄	12.3	575	120	3	11.19	1	0.09	6	8.6	1.35	348	TRUE	FALSE	FALSE	15.71
116.588	39.5964	河北省	廊坊	11.9	554.9	180	3	4.3	0.23	0.18	14	8.2	1.24	236.168	TRUE	FALSE	FALSE	14.9
115.417	39.5	河北省	保定	11.6	687	200	3	6.49514	0.99476	0.21	16	8	1.36	118	FALSE	FALSE	TRUE	14.25
115.067	38.1333	河北省	石家庄	12	575	300	3	11.2	1	0.09	6	8.6	1.35	348.362	FALSE	FALSE	TRUE	13.26
119.5	39.95	河北省	秦皇岛	11.5	644.2	240	3	15.4872	1.4	0.24	23.5	7.8	1.39	118	FALSE	FALSE	TRUE	12.9
115.067	38.1333	河北省	石家庄	13.8	575	300	3	11.1949	1	0.153	6	7.8	1.44	348.362	FALSE	FALSE	TRUE	12.85
114.683	37.8833	河北省	石家庄	12.2	536.8	126	3	7.5406	0.9	0.153	11.2	7.8	1.44	366	TRUE	FALSE	FALSE	11.9
114.986	36.7766	河北省	邯郸	13	503	240	3	7.25058	0.85	0.27	28	8.3	1.27	184.145	TRUE	FALSE	FALSE	11
115.417	39.5	河北省	保定	11.6	687	200	3	9.23	0.09	0.21	16	8.3	1.36	150	FALSE	FALSE	TRUE	10.84
114.683	37.8833	河北省	石家庄	12.5	536	150	3	12.47	1.48	0.199	6	8.16	1.35	365.896	TRUE	FALSE	FALSE	10.2
115.417	39.5	河北省	保定	11.6	687	150	3	9.23	0.09	0.21	16	8.3	1.36	150	FALSE	FALSE	TRUE	9.37
119.5	39.95	河北省	秦皇岛	11.5	644.2	0	3	15.4872	1.4	0.24	23.5	7.8	1.39	118	TRUE	FALSE	FALSE	8.4
115.417	39.5	河北省	保定	11.6	687	150	3	6.5	0.99	0.21	16	8	1.36	118	FALSE	FALSE	TRUE	8.08
115.533	38.0167	河北省	衡水	12.6	459.7	0	3	6.78654	0.4074	0.06	6	8.6	1.4	180.66	FALSE	FALSE	TRUE	8.01
115.067	38.1333	河北省	石家庄	12	575	150	3	11.2	1	0.09	6	8.6	1.35	348	FALSE	FALSE	TRUE	7.46
115.067	38.1333	河北省	石家庄	12.3	575	150	3	11.19	1	0.09	6	8.6	1.35	348	FALSE	FALSE	TRUE	7.46
115.067	38.1333	河北省	石家庄	13.8	575	150	3	11.1949	1	0.153	6	7.8	1.44	348.36	FALSE	FALSE	TRUE	7.22
115.067	38.1333	河北省	石家庄	12.3	575	0	3	11.1949	1	0.09	6	8.6	1.35	348.362	TRUE	FALSE	FALSE	6.04
114.683	37.8833	河北省	石家庄	12.5	536	180	3	12.47	1.48	0.199	6	8.16	1.35	365.896	FALSE	FALSE	TRUE	5.7
114.683	37.8833	河北省	石家庄	13	492	0	4	7.55	0.9	0.046	11.3	7.8	1.35	365.896	TRUE	FALSE	FALSE	5.27273
115.533	38.0167	河北省	衡水	12.6	459.7	0	3	6.78654	0.4074	0.06	6	8.6	1.4	180.66	TRUE	FALSE	FALSE	5.26
115.067	38.1333	河北省	石家庄	12	575	0	3	11.2	1	0.09	6	8.6	1.35	348.362	FALSE	FALSE	TRUE	5.25
115.65	37.7595	河北省	衡水	12	509	283	3	10.2668	1.15	0.147	5.21	8.3	1.39	138.492	TRUE	FALSE	FALSE	4.77
116.867	38.1667	河北省	沧州	13.4	520	0	3	12.25	0.7	0.128	14	8	1.3	213	TRUE	FALSE	FALSE	4.48
119.5	39.95	河北省	秦皇岛	11.5	644.2	0	3	15.4872	1.4	0.24	23.5	7.8	1.39	118	FALSE	FALSE	TRUE	4.4
116.588	39.5964	河北省	廊坊	11.9	554.9	0	3	4.3	0.23	0.18	14	8.2	1.24	236.168	TRUE	FALSE	FALSE	3.9
114.683	37.8833	河北省	石家庄	13	492	200	4	7.55	0.9	0.046	11.3	7.8	1.35	365.896	FALSE	FALSE	TRUE	3.80992
116.588	39.5964	河北省	廊坊	11.9	554.9	0	3	4.3	0.23	0.18	14	8.2	1.24	236.168	TRUE	FALSE	FALSE	3.8
117.63	39.7581	河北省	唐山	11.2	693	225	4	12.07	1.22	0.442	24	8.02	1.3	116.93	FALSE	FALSE	TRUE	3.4
115.417	39.5	河北省	保定	11.6	687	0	3	9.23	0.09	0.21	16	8.3	1.36	150	FALSE	FALSE	TRUE	3
116.602	39.547	河北省	廊坊	13.1	593.7	225	3	8.34	0.85	0.128	14	8.2	1.39	202.249	FALSE	FALSE	TRUE	2.98
116.867	38.1667	河北省	沧州	13.4	520	0	3	12.25	0.7	0.128	14	8	1.3	213	FALSE	FALSE	TRUE	2.47
114.683	37.8833	河北省	石家庄	12.5	536	0	3	9.68677	0.600231	0.17	6	8.5	1.47	365.896	TRUE	FALSE	FALSE	2.13
114.683	37.8833	河北省	石家庄	13	492	0	4	7.55	0.9	0.046	11.3	7.8	1.35	365.896	TRUE	FALSE	FALSE	2.09091
116.309	39.407	河北省	廊坊	11	513	225	3	8.34	0.85	0.06	6	8.2	1.6	151.518	TRUE	FALSE	FALSE	1.89
116.309	39.407	河北省	廊坊	11	513	225	3	8.34	0.85	0.06	6	8.2	1.6	151.518	TRUE	FALSE	FALSE	1.79
114.683	37.8833	河北省	石家庄	12.5	536	0	3	9.68677	0.600231	0.17	6	8.5	1.47	365.896	FALSE	FALSE	TRUE	1.46
115.413	38.81	河北省	保定	12	550	0	3	6.98956	0.6	0.153	6	8.7	1.4	221.561	TRUE	FALSE	FALSE	1.3
114.683	37.8833	河北省	石家庄	13	492	200	4	7.55	0.9	0.046	11.3	7.8	1.35	365.896	FALSE	FALSE	TRUE	1.24793
115.417	39.5	河北省	保定	11.6	687	0	3	6.49514	0.99476	0.21	16	8	1.36	118	FALSE	FALSE	TRUE	1.12
115.02	36.87	河北省	邯郸	13.2	556	180	3	7.13	0.8	0.097	10	8.2	1.36	167	FALSE	FALSE	TRUE	0.89
114.683	37.8833	河北省	石家庄	13	492	0	4	7.55	0.9	0.046	11.3	7.8	1.35	365.896	FALSE	FALSE	TRUE	0.735537
117.63	39.7581	河北省	唐山	11.2	693	0	4	12.07	1.22	0.442	24	8.02	1.3	116.93	FALSE	FALSE	TRUE	0.63
116.309	39.407	河北省	廊坊	11	513	0	3	8.34	0.85	0.06	6	8.2	1.6	151.518	TRUE	FALSE	FALSE	0.34
114.683	37.8833	河北省	石家庄	13	492	0	4	7.55	0.9	0.046	11.3	7.8	1.35	365.896	FALSE	FALSE	TRUE	0.330579
116.309	39.407	河北省	廊坊	11	513	0	3	8.34	0.85	0.06	6	8.2	1.6	151.518	TRUE	FALSE	FALSE	0.28
115.413	38.81	河北省	保定	12	550	0	3	6.98956	0.6	0.153	6	8.7	1.4	221.561	FALSE	FALSE	TRUE	0
114.551	35.0164	河南省	新乡	13.9	615	250	3	7.89	0.85	0.0823	8.53	8.25	1.4	290.664	FALSE	FALSE	TRUE	45.042
114.75	34.0167	河南省	周口	14	610	200	3	5.56265	0.63	0.187	14	8.44	1.39	257.75	TRUE	FALSE	FALSE	23.8
113.717	35	河南省	新乡	15.6	542.2	165	3	6.97	0.52	0.196	14	8.5	1.39	268.679	FALSE	FALSE	TRUE	23.39
113.716	35.0989	河南省	新乡	14.4	549.9	330	3	6.32251	0.63	0.187	14	8	1.39	287.547	TRUE	FALSE	FALSE	20.4
113.716	35.0989	河南省	新乡	14.4	549.9	225	3	6.32251	0.63	0.187	14	8.2	1.39	288	FALSE	FALSE	TRUE	14.3
113.211	33.4503	河南省	平顶山	14.7	786	280	3	9.26914	0.741579	0.2	11	6.8	1.47681	159.942	TRUE	FALSE	FALSE	13.4
114.4	35	河南省	新乡	13.9	615	150	4	3.9	0.4	0.06	6.5	8.55	1.58	280.086	FALSE	FALSE	TRUE	12.14
113.716	35.0989	河南省	新乡	14.4	549.9	315	3	6.32251	0.63	0.187	14	8	1.39	287.547	FALSE	FALSE	TRUE	12
113.211	33.4503	河南省	平顶山	14.7	786	255	3	9.26914	0.741579	0.2	11	6.8	1.47681	159.942	FALSE	FALSE	TRUE	11.1
113.717	35	河南省	新乡	15.6	542.2	165	3	13.39	0.59	0.196	14	8.52	1.39	268.679	FALSE	FALSE	TRUE	11.03
113.167	35.0667	河南省	焦作	13.9	605	225	3	8.57	1.45	0.18	14	8.2	1.42	220.332	FALSE	FALSE	TRUE	11.01
113.717	35	河南省	新乡	15.6	542.2	0	3	6.97	0.52	0.196	14	8.5	1.39	268.679	FALSE	FALSE	TRUE	10.8
113.211	33.4503	河南省	平顶山	14.7	786	232	3	9.27	0.74	0.2	11	6.8	1.48	160	TRUE	FALSE	FALSE	8.7
113.717	35	河南省	新乡	15.6	542.2	0	3	13.39	0.59	0.196	14	8.52	1.39	268.679	FALSE	FALSE	TRUE	8.4
113.697	35.0079	河南省	新乡	13	645	0	3	7.76682	0.64	0.2	6	8.1	1.4	268.93	FALSE	FALSE	TRUE	8.4
113.716	35.0989	河南省	新乡	14.4	549.9	240	3	6.32251	0.63	0.187	14	8.2	1.39	288	TRUE	FALSE	FALSE	8
113.211	33.4503	河南省	平顶山	14.7	786	225	3	9.27	0.74	0.2	11	6.8	1.48	160	FALSE	FALSE	TRUE	7.5
114.75	34.0167	河南省	周口	14	610	0	3	5.56265	0.63	0.187	14	8.44	1.39	257.75	TRUE	FALSE	FALSE	7
113.921	35.3187	河南省	新乡	14	582	200	3	4.52436	0.76	0.2	14	8	1.51	116.635	TRUE	FALSE	FALSE	6.6
113.921	35.3187	河南省	新乡	14	582	200	3	4.52436	0.76	0.2	14	8	1.51	116.635	TRUE	FALSE	FALSE	5.16
113.766	34.9876	河南省	新乡	13	600	82.5	3	10.69	0.44	0.196	6	8.14	1.18	270.519	FALSE	FALSE	TRUE	4
114.041	33.3942	河南省	驻马店	14	875	82.5	3	18.87	1.42	0.381	7	6.64	1.13	289.021	FALSE	FALSE	TRUE	3.14
113.464	34.1316	河南省	许昌	13	676	82.5	3	12.36	0.51	0.255	6	7.12	1.31	214.373	FALSE	FALSE	TRUE	2.9
115.068	32.1429	河南省	信阳	15	1075	82.5	3	13.55	0.71	0.341	11	5.82	1.4	202.261	FALSE	FALSE	TRUE	2.7
113.766	34.9876	河南省	新乡	13	600	0	3	10.69	0.44	0.196	6	8.14	1.18	270.519	FALSE	FALSE	TRUE	2.53
113.464	34.1316	河南省	许昌	13	676	0	3	12.36	0.51	0.255	6	7.12	1.31	214.373	FALSE	FALSE	TRUE	2.29
114.041	33.3942	河南省	驻马店	14	875	0	3	18.87	1.42	0.381	7	6.64	1.13	289.021	FALSE	FALSE	TRUE	2.18
113.211	33.4503	河南省	平顶山	14.7	786	0	3	9.26914	0.741579	0.2	11	6.8	1.47681	159.942	FALSE	FALSE	TRUE	1.73
115.068	32.1429	河南省	信阳	15	1075	0	3	13.55	0.71	0.341	11	5.82	1.4	202.261	FALSE	FALSE	TRUE	1.66
113.211	33.4503	河南省	平顶山	14.7	786	0	3	9.26914	0.741579	0.2	11	6.8	1.47681	159.942	TRUE	FALSE	FALSE	0.2
120.412	30.44	浙江省	嘉兴	15.9	1187	330	3	7.83063	1.13	0.164	11	7.41	1.16	223.017	FALSE	TRUE	FALSE	238.04
119.477	29.0219	浙江省	金华	17.5	1424	180	3	14.8	1.87	0.48	10	5.31	1.39	126.996	FALSE	TRUE	FALSE	56.4
119.53	30.21	浙江省	杭州	15.75	1350	270	3	11.2	3.5	0.149	6.8	5.39	1.41	34.7299	FALSE	TRUE	FALSE	54.05
119.903	30.3595	浙江省	杭州	16	1448	300	3	14.27	1.64	0.21	11	5.39	1.73	136.374	FALSE	TRUE	FALSE	50
120.412	30.44	浙江省	嘉兴	15.9	1187	0	3	7.83063	1.13	0.164	11	7.41	1.16	223.017	FALSE	TRUE	FALSE	48.62
119.477	29.0219	浙江省	金华	17.5	1424	180	3	14.8	1.87	0.48	10	5.31	1.39	126.996	FALSE	TRUE	FALSE	44.8
120.406	30.4353	浙江省	嘉兴	16.5	1550	180	3	4.6	0.51	0.21	11	6.79	1.4	220.661	FALSE	TRUE	FALSE	43.49
120.645	30.0035	浙江省	绍兴	17.3	1350	225	3	18.3	1.51	0.44	10	6.85	1.27	154.926	FALSE	TRUE	FALSE	37.58
120.417	30.4344	浙江省	嘉兴	16.5	1550	180	3	4.59977	0.51	0.164	11	6.79	1.41	220.476	FALSE	TRUE	FALSE	32.23
119.133	30.0833	浙江省	杭州	16	1250	200	3	13.2	1.45	0.366	12	5.4	1.31	196	FALSE	TRUE	FALSE	28.8
119.133	30.0833	浙江省	杭州	16	1250	200	3	13.2	1.45	0.366	12	5.4	1.31	196	FALSE	TRUE	FALSE	28.2
119.133	30.0833	浙江省	杭州	16	1250	200	3	13.2	1.45	0.366	12	5.4	1.31	196	FALSE	TRUE	FALSE	26.7
119.133	30.0833	浙江省	杭州	16	1250	200	3	13.2	1.45	0.366	12	5.4	1.31	196	FALSE	TRUE	FALSE	24.2
120.412	30.44	浙江省	嘉兴	15.9	1187	150	3	7.8	1.13	0.21	11	7.41	1.16	223.017	FALSE	TRUE	FALSE	23.0826
119.133	30.0833	浙江省	杭州	16	1250	200	3	13.2	1.45	0.366	12	5.4	1.31	196	FALSE	TRUE	FALSE	22.9
120.3	30.5	浙江省	杭州	15.5	1300	180	3	11.4269	2.3	0.37	5.4	7.2	1.04	213.834	FALSE	TRUE	FALSE	21.9
120.417	30.4344	浙江省	嘉兴	16.5	1550	180	3	4.6	0.51	0.21	11	6.79	1.4	220.476	FALSE	TRUE	FALSE	11.09
119.477	29.0219	浙江省	金华	17.5	1424	0	3	14.8	1.87	0.48	10	5.31	1.39	126.996	FALSE	TRUE	FALSE	9.5
119.477	29.0219	浙江省	金华	17.5	1424	0	3	14.8	1.87	0.48	10	5.31	1.39	126.996	FALSE	TRUE	FALSE	9.5
121.363	29.7928	浙江省	宁波	18.1	1382	240	4	21.6	2.31	0.196	11	6.2	1.08	157.851	FALSE	FALSE	TRUE	7.29
120.3	30.5	浙江省	杭州	15.5	1300	0	3	11.4269	2.3	0.37	5.4	7.2	1.04	213.834	FALSE	TRUE	FALSE	4.2
120.667	30.8333	浙江省	嘉兴	15.5	1100	0	3	20.3016	2.7	0.517	8.1	6.8	1.33	325.514	FALSE	TRUE	FALSE	4
120.412	30.44	浙江省	嘉兴	15.9	1187	0	3	7.8	1.13	0.21	11	7.41	1.16	223.017	FALSE	TRUE	FALSE	3.84298
120.406	30.4353	浙江省	嘉兴	16.5	1550	0	3	4.6	0.51	0.21	11	6.79	1.4	220.661	FALSE	TRUE	FALSE	3.14
120.417	30.4344	浙江省	嘉兴	16.5	1550	0	3	4.59977	0.51	0.164	11	6.79	1.41	220.476	FALSE	TRUE	FALSE	2.3
120.417	30.4344	浙江省	嘉兴	16.5	1550	0	3	4.6	0.51	0.21	11	6.79	1.4	220.476	FALSE	TRUE	FALSE	1.21
121.363	29.7928	浙江省	宁波	18.1	1382	0	4	21.6	2.31	0.196	11	6.2	1.08	157.851	FALSE	FALSE	TRUE	0.36
109.499	19.5127	海南省	儋州	23.5	1815	185	3	17.63	1.39	0.27	6	4.98	1.4	37.0885	FALSE	TRUE	FALSE	28.56
109.773	18.4125	海南省	三亚	24.3	2067	0	3	6.44	0.64	0.035	4.37	6.46	1.49	38	FALSE	TRUE	FALSE	21.01
110.328	19.9819	海南省	海口	24.3	1647	225	3	6.52	1.8	0.224	17	6.4	1.29	61	FALSE	TRUE	FALSE	5.97
110.328	19.9819	海南省	海口	24.3	1647	0	3	6.52	1.8	0.224	17	6.4	1.29	61	FALSE	TRUE	FALSE	4.21
109.499	19.5127	海南省	儋州	23.5	1815	0	3	17.63	1.39	0.27	6	4.98	1.4	37.0885	FALSE	TRUE	FALSE	1.23
114.03	30.5305	湖北省	武汉	16	1380	180	3	16.3863	2.13	0.21	11	7.15	1.41	130.972	FALSE	TRUE	FALSE	82.37
114.328	30.4903	湖北省	武汉	16	1300	210	3	12	0.864	0.44	20	6.3	1.34	80.4676	FALSE	TRUE	FALSE	62.82
114.03	30.5305	湖北省	武汉	16	1380	180	3	16.3863	2.13	0.21	11	7.15	1.41	130.972	FALSE	TRUE	FALSE	62.04
115.55	29.85	湖北省	黄冈	16	1464	180	3	24.07	2.39	0.18	14	5.18	1.7	127.489	FALSE	TRUE	FALSE	51.6
114.328	30.4903	湖北省	武汉	16	1300	147	3	12	0.86	0.44	20	6.3	1.34	80	FALSE	TRUE	FALSE	45.88
115.55	29.85	湖北省	黄冈	16	1464	180	3	24.07	2.39	0.18	14	5.18	1.7	127.489	FALSE	TRUE	FALSE	41.4
114.328	30.4903	湖北省	武汉	16	1300	147	3	12	0.86	0.44	20	6.3	1.34	80	FALSE	TRUE	FALSE	41.27
115.5	29.9167	湖北省	黄冈	16	1453	210	3	18.4	3.57	0.21	11	6.58	1.73	129	FALSE	TRUE	FALSE	40.7
115.55	29.85	湖北省	黄冈	17.8	1361	180	3	6	2.39	0.129	14	5.18	1.39	127.489	FALSE	TRUE	FALSE	30.98
115.5	29.9167	湖北省	黄冈	16	1453	210	3	18.4	3.57	0.21	11	6.58	1.73	129	FALSE	TRUE	FALSE	27.7
112.102	30.3831	湖北省	荆州	16	1150	195	4	25.3	1.4	0.096	11	6.4	1.4	152.075	FALSE	TRUE	FALSE	23.9
114.328	30.4903	湖北省	武汉	16	1300	0	3	12	0.864	0.44	20	6.3	1.34	80.4676	FALSE	TRUE	FALSE	22.11
115.55	29.85	湖北省	黄冈	16	1464	0	3	24.07	2.39	0.18	14	5.18	1.7	127.489	FALSE	TRUE	FALSE	20.8
112.102	30.3831	湖北省	荆州	16	1150	195	4	25.3	1.4	0.096	11	6.4	1.4	152.075	FALSE	TRUE	FALSE	20.8
112.15	30.35	湖北省	荆州	16	1110	180	3	12.3666	2.13	0.166	16	7.47	1.36	136.594	FALSE	TRUE	FALSE	17.49
114.328	30.4903	湖北省	武汉	16	1300	225	3	12	0.864	0.44	20	6.3	1.34	80.4676	FALSE	FALSE	TRUE	17.05
112.15	30.35	湖北省	荆州	16	1110	180	3	6.46172	1.37	0.166	16	7.7	1.44	136.594	FALSE	TRUE	FALSE	16.74
112.307	30.7181	湖北省	荆门	16.3	1100	180	3	11.78	0.74	0.402	11	6.84	1.41	215.389	FALSE	TRUE	FALSE	16.11
114.03	30.5305	湖北省	武汉	16	1380	0	3	16.3863	2.13	0.21	11	7.15	1.41	130.972	FALSE	TRUE	FALSE	14.97
114.03	30.5305	湖北省	武汉	16	1380	0	3	16.3863	2.13	0.21	11	7.15	1.41	130.972	FALSE	TRUE	FALSE	13.1
114.328	30.4903	湖北省	武汉	16	1300	157.5	3	12	0.86	0.44	20	6.3	1.34	80	FALSE	FALSE	TRUE	13.03
114.328	30.4903	湖北省	武汉	16	1300	157.5	3	12	0.86	0.44	20	6.3	1.34	80	FALSE	FALSE	TRUE	12.32
115.55	29.85	湖北省	黄冈	17.8	1361	0	3	6	2.39	0.129	14	5.18	1.39	127.489	FALSE	TRUE	FALSE	11.77
115.55	29.85	湖北省	黄冈	16	1464	0	3	24.07	2.39	0.18	14	5.18	1.7	127.489	FALSE	TRUE	FALSE	9.9
112.15	30.35	湖北省	荆州	16	1110	0	3	12.3666	2.13	0.166	16	7.47	1.36	136.594	FALSE	TRUE	FALSE	5.13
114.328	30.4903	湖北省	武汉	16	1300	0	3	12	0.864	0.44	20	6.3	1.34	80.4676	FALSE	FALSE	TRUE	4.83
112.307	30.7181	湖北省	荆门	16.3	1100	180	3	11.78	0.74	0.402	11	6.84	1.41	215.389	FALSE	FALSE	TRUE	3.51
112.767	30.8833	湖北省	荆门	16	1051	210	3	7.59861	1.47	0.251	7	6.07	1.27	73.8384	FALSE	FALSE	TRUE	3.25
112.767	30.8833	湖北省	荆门	16	1051	210	3	7.59861	1.47	0.251	7	6.07	1.27	73.8384	FALSE	FALSE	TRUE	3.24
112.767	30.8833	湖北省	荆门	16	1051	210	3	7.59861	1.47	0.251	7	6.07	1.27	73.8384	FALSE	TRUE	FALSE	3.11
112.767	30.8833	湖北省	荆门	16	1051	210	3	7.59861	1.47	0.251	7	6.07	1.27	73.8384	FALSE	TRUE	FALSE	2.4
113.834	28.2963	湖南省	长沙	17.3	1552.3	240	3	8.45128	1.51	0.346	11	5.75	1.41	46.5036	TRUE	FALSE	FALSE	147.09
113.103	29.3092	湖南省	岳阳	17	1537.8	165	3	18.3411	1.79	0.27	10	6.1	1.22884	28.7164	FALSE	TRUE	FALSE	96.9
112.763	28.9736	湖南省	益阳	16	1465	165	3	22.7436	1.95	0.21	11	6.1	1.38786	124.843	FALSE	TRUE	FALSE	94.9
113.205	28.1501	湖南省	长沙	16.8	1400	180	3	21.87	1.92	0.21	11	5.77	1.22	111.482	FALSE	TRUE	FALSE	94.42
113.103	29.3092	湖南省	岳阳	17	1537.8	150	3	18.3411	1.79	0.27	10	6.1	1.22884	28.7164	FALSE	TRUE	FALSE	89.3
113.107	28.1835	湖南省	长沙	17	1405	180	3	9.64037	1.21	0.346	11	5.61	1.41	132.024	FALSE	TRUE	FALSE	85.75
112.763	28.9736	湖南省	益阳	16	1465	150	3	22.7436	1.95	0.21	11	6.1	1.38786	124.843	FALSE	TRUE	FALSE	80.6
113.205	28.1501	湖南省	长沙	16.8	1400	135	3	21.87	1.92	0.21	11	5.77	1.22	111	FALSE	TRUE	FALSE	74.85
113.205	28.1501	湖南省	长沙	16.8	1400	150	3	21.87	1.92	0.21	11	5.77	1.22	111.482	FALSE	TRUE	FALSE	65.67
111.87	26.76	湖南省	永州	18.6	1454	150	4	14.1	1.58	0.415	9.5	6.8	1.26	80.2334	FALSE	TRUE	FALSE	63.8595
112.944	28.9292	湖南省	岳阳	17	1300	180	3	22.935	2.63	0.185	16	4.89	1.36	125.694	FALSE	TRUE	FALSE	63.31
111.87	26.76	湖南省	永州	18.6	1454	150	4	14.1	1.58	0.415	9.5	6.8	1.26	80.2334	FALSE	TRUE	FALSE	62.0826
113.817	28.3167	湖南省	长沙	17.3	1171.6	180	3	9.64037	1.21	0.48	10	5.61	1.24191	48.2435	FALSE	TRUE	FALSE	61.23
111.87	26.76	湖南省	永州	18.3	1300	150	4	14.21	1.58	0.48	10	6.8	1.26	80.2334	FALSE	TRUE	FALSE	59.1
113.103	29.3092	湖南省	岳阳	17	1537.8	132	3	18.34	1.79	0.27	10	6.1	1.23	29	FALSE	TRUE	FALSE	57.4
111.87	26.76	湖南省	永州	18.3	1300	150	4	14.21	1.58	0.48	10	6.8	1.26	80.2334	FALSE	TRUE	FALSE	57.36
113.862	28.2965	湖南省	长沙	16	1590	150	3	8.1	3.21	0.21	11	5.7	1.73	46.5543	FALSE	TRUE	FALSE	55.58
113.817	28.3167	湖南省	长沙	17.3	1171.6	150	3	9.64037	1.21	0.48	10	5.61	1.24191	48.2435	FALSE	TRUE	FALSE	55.58
113.107	28.1835	湖南省	长沙	17	1405	150	3	9.64037	1.21	0.346	11	5.61	1.41	132.024	FALSE	TRUE	FALSE	55.42
113.817	28.3167	湖南省	长沙	17.3	1171.6	180	3	9.64037	1.21	0.48	10	5.61	1.24191	48.2435	FALSE	TRUE	FALSE	55.27
113.817	28.3167	湖南省	长沙	17.3	1171.6	150	3	9.64037	1.21	0.48	10	5.61	1.24191	48.2435	FALSE	TRUE	FALSE	54.84
112.763	28.9736	湖南省	益阳	16	1465	132	3	22.74	1.95	0.21	11	6.1	1.39	125	FALSE	TRUE	FALSE	52.5
113.331	28.5511	湖南省	长沙	17.5	1330	180	3	23.7239	1.81	0.03	11	5.06	1.09	92.4126	FALSE	TRUE	FALSE	51.342
113.817	28.3167	湖南省	长沙	17.3	1171.6	180	3	9.64037	1.21	0.48	10	5.61	1.24191	48.2435	FALSE	TRUE	FALSE	50.55
113.862	28.2965	湖南省	长沙	16	1590	180	3	8.1	3.21	0.21	11	5.7	1.73	46.5543	FALSE	TRUE	FALSE	50.54
113.862	28.2957	湖南省	长沙	16	1589	180	3	8.10325	3.21	0.198	11	5.7	1.41	46.5543	FALSE	TRUE	FALSE	50.25
113.331	28.5511	湖南省	长沙	17.5	1330	180	3	23.7239	1.81	0.03	11	5.06	1.09	92.4126	FALSE	TRUE	FALSE	49.512
113.817	28.3167	湖南省	长沙	17.3	1171.6	150	3	9.64037	1.21	0.48	10	5.61	1.24191	48.2435	FALSE	TRUE	FALSE	47.47
113.862	28.2957	湖南省	长沙	16	1589	150	3	8.10325	3.21	0.198	11	5.7	1.41	46.5543	FALSE	TRUE	FALSE	47.05
113.103	29.3092	湖南省	岳阳	17	1537.8	120	3	18.34	1.79	0.27	10	6.1	1.23	29	FALSE	TRUE	FALSE	46.7
111.867	26.75	湖南省	永州	18.3	1325	150	3	11.4849	1.38	0.281	10	6.8	1.25	80.6284	FALSE	TRUE	FALSE	43.6
112.763	28.9736	湖南省	益阳	16	1465	120	3	22.74	1.95	0.21	11	6.1	1.39	125	FALSE	TRUE	FALSE	43.4
111.87	26.76	湖南省	永州	17	1265	110	3	19.84	2.2	0.48	10	5.94	1.4	80.2334	FALSE	TRUE	FALSE	43.21
111.867	26.75	湖南省	永州	18.3	1325	150	3	11.4849	1.38	0.281	10	6.8	1.25	80.6284	FALSE	TRUE	FALSE	39.9
112.944	28.9292	湖南省	岳阳	17	1300	180	3	22.935	2.63	0.185	16	4.89	1.36	125.694	FALSE	TRUE	FALSE	39.87
113.205	28.1501	湖南省	长沙	16.8	1400	112	3	21.87	1.92	0.21	11	5.77	1.22	111	FALSE	TRUE	FALSE	38.31
113.331	28.5511	湖南省	长沙	17.5	1330	150	3	23.7239	1.81	0.03	11	5.06	1.09	92.4126	FALSE	TRUE	FALSE	34.756
113.331	28.5511	湖南省	长沙	17.5	1330	150	3	23.7239	1.81	0.03	11	5.06	1.09	92.4126	FALSE	TRUE	FALSE	31.585
113.843	28.3008	湖南省	长沙	17.3	1552	240	3	8.45	3.51	0.21	11	5.75	1.73	47.0757	TRUE	FALSE	FALSE	31.05
113.834	28.2963	湖南省	长沙	17.3	1552.3	0	3	8.45128	1.51	0.346	11	5.75	1.41	46.5036	TRUE	FALSE	FALSE	29.34
113.282	28.2119	湖南省	长沙	17	1390	200	3	21.1717	2.13	0.162	12.9	6.73	1.3	109.068	FALSE	TRUE	FALSE	22.75
113.103	29.3092	湖南省	岳阳	17	1537.8	0	3	18.3411	1.79	0.27	10	6.1	1.22884	28.7164	FALSE	TRUE	FALSE	22.6
113.067	28.1833	湖南省	长沙	17	1405	90	5	16	1.6	0.21	11	5.8	1.41	131.155	FALSE	TRUE	FALSE	22.45
113.103	29.3092	湖南省	岳阳	17	1537.8	0	3	18.3411	1.79	0.27	10	6.1	1.22884	28.7164	FALSE	TRUE	FALSE	22.3
112.763	28.9736	湖南省	益阳	16	1465	0	3	22.7436	1.95	0.21	11	6.1	1.38786	124.843	FALSE	TRUE	FALSE	20.8
112.763	28.9736	湖南省	益阳	16	1465	0	3	22.7436	1.95	0.21	11	6.1	1.38786	124.843	FALSE	TRUE	FALSE	18.8
111.55	28.9167	湖南省	常德	16.5	1447.9	203	3	18.04	3.16	0.48	10	4.9	1.39	179.85	FALSE	TRUE	FALSE	18.7
111.876	26.7533	湖南省	永州	18	1250	90	3	7.89	1.07	0.48	10	4.73022	1.19	80.3035	FALSE	FALSE	TRUE	18.2
113.107	28.1835	湖南省	长沙	17	1405	0	3	9.64037	1.21	0.346	11	5.61	1.41	132.024	FALSE	TRUE	FALSE	17.3
113.107	28.1835	湖南省	长沙	17	1405	0	3	9.64037	1.21	0.346	11	5.61	1.41	132.024	FALSE	TRUE	FALSE	16.32
113.862	28.2965	湖南省	长沙	16	1590	0	3	8.1	3.21	0.21	11	5.7	1.73	46.5543	FALSE	TRUE	FALSE	15.02
113.817	28.3167	湖南省	长沙	17.3	1171.6	0	3	9.64037	1.21	0.48	10	5.61	1.24191	48.2435	FALSE	TRUE	FALSE	15.02
113.817	28.3167	湖南省	长沙	17.3	1171.6	0	3	9.64037	1.21	0.48	10	5.61	1.24191	48.2435	FALSE	TRUE	FALSE	14.13
113.817	28.3167	湖南省	长沙	17.3	1171.6	0	3	9.64037	1.21	0.48	10	5.61	1.24191	48.2435	FALSE	TRUE	FALSE	13.76
113.817	28.3167	湖南省	长沙	17.3	1171.6	0	3	9.64037	1.21	0.48	10	5.61	1.24191	48.2435	FALSE	TRUE	FALSE	13.53
113.817	28.3167	湖南省	长沙	17.3	1171.6	0	3	9.64037	1.21	0.48	10	5.61	1.24191	48.2435	FALSE	TRUE	FALSE	13.38
113.862	28.2965	湖南省	长沙	16	1590	0	3	8.1	3.21	0.21	11	5.7	1.73	46.5543	FALSE	TRUE	FALSE	11.97
113.817	28.3167	湖南省	长沙	17.3	1171.6	0	3	9.64037	1.21	0.48	10	5.61	1.24191	48.2435	FALSE	TRUE	FALSE	11.97
111.55	28.9167	湖南省	常德	16.5	1447.9	180	3	18.04	3.16	0.48	10	4.9	1.39	179.85	FALSE	TRUE	FALSE	11.6
113.862	28.2957	湖南省	长沙	16	1589	0	3	8.10325	3.21	0.198	11	5.7	1.41	46.5543	FALSE	TRUE	FALSE	10.86
113.843	28.3008	湖南省	长沙	17.3	1552	0	3	8.45	3.51	0.21	11	5.75	1.73	47.0757	TRUE	FALSE	FALSE	10.48
113.205	28.1501	湖南省	长沙	16.8	1400	0	3	21.87	1.92	0.21	11	5.77	1.22	111.482	FALSE	TRUE	FALSE	10.07
113.862	28.2957	湖南省	长沙	16	1589	0	3	8.10325	3.21	0.198	11	5.7	1.41	46.5543	FALSE	TRUE	FALSE	10.06
113.282	28.2119	湖南省	长沙	17	1390	200	3	16.4385	4.59	0.162	12	7.14	1.3	109.068	FALSE	TRUE	FALSE	8.12
111.876	26.7533	湖南省	永州	18	1250	210	3	7.89	1.07	0.48	10	4.73022	1.19	80.3035	TRUE	FALSE	FALSE	7.4
113.817	28.317	湖南省	长沙	16	1551	120	3	9.64037	1.21	0.21	11	5.61	1.24191	48.2435	FALSE	TRUE	FALSE	6.7
113.205	28.1501	湖南省	长沙	16.8	1400	0	3	21.87	1.92	0.21	11	5.77	1.22	111.482	FALSE	TRUE	FALSE	5.9
113.817	28.317	湖南省	长沙	16	1551	0	3	9.64037	1.21	0.21	11	5.61	1.24191	48.2435	FALSE	TRUE	FALSE	3.81
111.55	28.9167	湖南省	常德	16.5	1447.9	0	3	18.04	3.16	0.48	10	4.9	1.39	179.85	FALSE	TRUE	FALSE	3.8
111.87	26.76	湖南省	永州	18.3	1300	0	4	14.21	1.58	0.48	10	6.8	1.26	80.2334	FALSE	TRUE	FALSE	2.2
111.87	26.76	湖南省	永州	18.6	1454	0	4	14.1	1.58	0.415	9.5	6.8	1.26	80.2334	FALSE	TRUE	FALSE	2.09091
113.282	28.2119	湖南省	长沙	17	1390	0	3	16.4385	4.59	0.162	12	7.14	1.3	109.068	FALSE	TRUE	FALSE	1.74
111.87	26.76	湖南省	永州	18.6	1454	0	4	14.1	1.58	0.415	9.5	6.8	1.26	80.2334	FALSE	TRUE	FALSE	1.49587
111.55	28.9167	湖南省	常德	16.5	1447.9	0	3	18.04	3.16	0.48	10	4.9	1.39	179.85	FALSE	TRUE	FALSE	1.3
111.876	26.7533	湖南省	永州	18	1250	0	3	7.89	1.07	0.48	10	4.73022	1.19	80.3035	FALSE	FALSE	TRUE	1
111.87	26.76	湖南省	永州	18.3	1300	0	4	14.21	1.58	0.48	10	6.8	1.26	80.2334	FALSE	TRUE	FALSE	0.74
111.876	26.7533	湖南省	永州	18	1250	0	3	7.89	1.07	0.48	10	4.73022	1.19	80.3035	TRUE	FALSE	FALSE	0.7
113.282	28.2119	湖南省	长沙	17	1390	200	3	1.71114	0.51	0.162	11.7	4.88	1.3	109.068	FALSE	TRUE	FALSE	0.63
107.667	35.2	甘肃省	平凉	9.1	580	225	3	9.2	1.5	0.201	9	8	1.2	140	TRUE	FALSE	FALSE	61.85
107.667	35.2	甘肃省	平凉	9.1	580	225	3	9.2	1.5	0.201	9	8	1.2	140	TRUE	FALSE	FALSE	48.74
107.667	35.2	甘肃省	平凉	9.1	578.5	120	3	6.09049	0.57	0.19	9	8.3	1.41	76	FALSE	FALSE	TRUE	30.07
107.67	35.2	甘肃省	平凉	9.1	578.5	139	3	6.09049	1.02	0.228	9	8.3	1.38	152	FALSE	FALSE	TRUE	30.07
107.667	35.2	甘肃省	平凉	9.1	580	225	3	9.2	1.5	0.201	9	8	1.2	140	TRUE	FALSE	FALSE	28.54
102.833	37.8667	甘肃省	武威	7.8	164	280	3	6.61	0.877154	0.22	11	8.1	1.45	208.599	TRUE	FALSE	FALSE	27
100.433	38.9333	甘肃省	张掖	7	130	400	3	7.25058	0.87	0.064	10	8.2	1.36	250	TRUE	FALSE	FALSE	25.73
107.667	35.2	甘肃省	平凉	9.1	580	225	3	9.2	1.5	0.201	9	8	1.2	140	TRUE	FALSE	FALSE	22.92
100.433	38.9333	甘肃省	张掖	7	130	300	3	7.25	0.87	0.064	10	8.2	1.36	250	TRUE	FALSE	FALSE	19.93
107.493	35.495	甘肃省	庆阳	10	552	225	3	8.23666	1.07	0.2	16	8.69	1.31	163	TRUE	FALSE	FALSE	18.771
107.493	35.495	甘肃省	庆阳	10	552	225	3	8.23666	1.07	0.2	16	8.69	1.31	163	TRUE	FALSE	FALSE	18.33
102.833	37.8667	甘肃省	武威	7.8	164	200	3	6.61	0.88	0.22	11	8.1	1.45	209	TRUE	FALSE	FALSE	18
103.067	36.0833	甘肃省	临夏	10	360	138	3	6.51	0.95	0.26	20	8.2	1.26	42	TRUE	FALSE	FALSE	9.58
103.067	36.0833	甘肃省	临夏	10	360	0	3	6.51	0.95	0.26	20	8.2	1.26	42	TRUE	FALSE	FALSE	3.867
100.433	38.9333	甘肃省	张掖	7	130	0	3	7.25058	0.87	0.064	10	8.2	1.36	250	TRUE	FALSE	FALSE	2.53
107.493	35.495	甘肃省	庆阳	10	552	0	3	8.23666	1.07	0.2	16	8.69	1.31	163	TRUE	FALSE	FALSE	1.341
107.493	35.495	甘肃省	庆阳	10	552	0	3	8.23666	1.07	0.2	16	8.69	1.31	163	TRUE	FALSE	FALSE	1.12
107.667	35.2	甘肃省	平凉	9.1	578.5	0	3	6.09049	0.57	0.19	9	8.3	1.41	76	FALSE	FALSE	TRUE	0.856
107.67	35.2	甘肃省	平凉	9.1	578.5	0	3	6.09049	1.02	0.228	9	8.3	1.38	152	FALSE	FALSE	TRUE	0.01
107.1	26.87	贵州省	贵阳	13.5	1129.9	120	3	23.0452	1.64	0.54	14	7.42	1.21	41	TRUE	FALSE	FALSE	6.477
107.1	26.87	贵州省	贵阳	13.5	1129.9	0	3	23.0452	1.64	0.54	14	7.42	1.21	41	TRUE	FALSE	FALSE	5.181
122.26	41.17	辽宁省	盘锦	9.2	613.7	160	3	13.8	1.61	0.52	31	7.28	1.4	124.798	FALSE	TRUE	FALSE	45.64
124	43.1667	辽宁省	铁岭	6	608	180	3	12.761	4.28	0.088	13	5.6	1.43	45	TRUE	FALSE	FALSE	30.4
124	43.1667	辽宁省	铁岭	6	608	180	3	12.761	4.28	0.088	13	5.6	1.43	45	TRUE	FALSE	FALSE	28.6
123.57	41.83	辽宁省	沈阳	7	732	240	3	10.4756	1.2	0.234	20	5.37	1.3	100	TRUE	FALSE	FALSE	18.64
123.4	41.5167	辽宁省	沈阳	7.5	675	180	3	10.1624	1.03	0.1488	17.71	6.97	1.38	82.8025	FALSE	TRUE	FALSE	17.8
123.11	41.85	辽宁省	沈阳	8	703	225	3	20.6845	0.98	0.141	11	7.38	1.41	131.193	FALSE	TRUE	FALSE	14.67
123.11	41.85	辽宁省	沈阳	8	703	180	3	20.6845	0.98	0.141	11	7.38	1.41	131	FALSE	TRUE	FALSE	13.45
123.11	41.85	辽宁省	沈阳	8	703	0	3	20.6845	0.98	0.141	11	7.38	1.41	131.193	FALSE	TRUE	FALSE	13.27
123.383	41.5333	辽宁省	沈阳	7.5	700	200	3	12.3	1.13	0.2038	20	5.5	1.3	94.0295	TRUE	FALSE	FALSE	12.2
124	43.1667	辽宁省	铁岭	6	608	0	3	12.761	4.28	0.088	13	5.6	1.43	45	TRUE	FALSE	FALSE	12
124	43.1667	辽宁省	铁岭	6	608	0	3	12.761	4.28	0.088	13	5.6	1.43	45	TRUE	FALSE	FALSE	11.2
122.26	41.17	辽宁省	盘锦	9.2	613.7	0	3	13.8	1.61	0.52	31	7.28	1.4	124.798	FALSE	TRUE	FALSE	8.56
123.933	42.3667	辽宁省	铁岭	8	608	180	3	10.6148	0.8	0.156	11	6.9	1.41	35.8863	TRUE	FALSE	FALSE	6.19
123.576	41.8327	辽宁省	沈阳	7	731	60	3	10.9165	1.1	0.22	13	7.9	1.31	32.9859	TRUE	FALSE	FALSE	4.3842
123.57	41.83	辽宁省	沈阳	7	732	0	3	10.4756	1.2	0.234	20	5.37	1.3	100	TRUE	FALSE	FALSE	3.69
123.933	42.3667	辽宁省	铁岭	8	608	0	3	10.6148	0.8	0.156	11	6.9	1.41	35.8863	TRUE	FALSE	FALSE	3.12
123.576	41.8327	辽宁省	沈阳	7	710	160	3	10.9165	0.958003	0.22	13	7.6	1.21	32.9859	TRUE	FALSE	FALSE	2.843
123.576	41.8327	辽宁省	沈阳	7	731	0	3	10.9165	1.1	0.22	13	7.9	1.31	32.9859	TRUE	FALSE	FALSE	1.7194
123.75	42.8167	辽宁省	铁岭	6.5	569	200	3	10.96	1.3	0.238	16	5.7	1.54	60	TRUE	FALSE	FALSE	1.08
123.4	41.5167	辽宁省	沈阳	7.5	675	0	3	10.1624	1.03	0.1488	17.71	6.97	1.38	82.8025	FALSE	TRUE	FALSE	0.45
123.576	41.8327	辽宁省	沈阳	7	710	0	3	10.9165	0.958003	0.22	13	7.6	1.21	32.9859	TRUE	FALSE	FALSE	0.179
108.957	34.2256	陕西省	西安	9	197	296	5	9.10673	0.4	0.21	11	7.9	1.41	182.938	TRUE	FALSE	FALSE	72.4
108.067	34.2667	陕西省	咸阳	12	649	270	4	6.96056	0.7	0.03	11	8	1.41	153.463	FALSE	FALSE	TRUE	57
108.08	34.2459	陕西省	咸阳	12	600	300	3	7.05	1.18	0.21	11	7.9	1.41	149.51	TRUE	FALSE	FALSE	54.26
108.957	34.2256	陕西省	西安	9	197	186	5	9.11	0.4	0.21	11	7.9	1.41	183	TRUE	FALSE	FALSE	46
108.2	34.15	陕西省	西安	12	675	220	3	5.8	0.35	0.205	12	7.96	1.41	136.531	TRUE	FALSE	FALSE	40.5
108.957	34.2256	陕西省	西安	9	197	157	5	9.11	0.4	0.21	11	7.9	1.41	183	TRUE	FALSE	FALSE	39
108.067	34.2833	陕西省	咸阳	12.9	550	270	3	8.39907	0.77	0.22	11	7.8	1.4	157.736	TRUE	FALSE	FALSE	37.07
108.4	34.3333	陕西省	咸阳	12	561.1	200	3	5.97448	0.92	0.255	12	8.14	1.41	183.816	TRUE	FALSE	FALSE	36.7
108.4	34.3333	陕西省	咸阳	12	561.1	200	3	5.97448	0.92	0.255	12	8.14	1.41	183.816	TRUE	FALSE	FALSE	34.04
108.067	34.2667	陕西省	咸阳	12	649	150	4	6.96056	0.7	0.03	11	8	1.41	153.46	FALSE	FALSE	TRUE	34
108.4	34.3	陕西省	咸阳	13.7	570	200	3	5.97448	1.09	0.14	12	8.3	1.4	177.138	TRUE	FALSE	FALSE	32.97
108.4	34.3333	陕西省	咸阳	12	561.1	200	3	5.97448	1.09	0.255	12	8.3	1.41	183.816	TRUE	FALSE	FALSE	32.97
108.067	34.2667	陕西省	咸阳	12	649	150	4	6.96056	0.7	0.03	11	8	1.41	153.46	FALSE	FALSE	TRUE	31
108.083	34.3	陕西省	咸阳	12.9	660	225	3	7.79	0.58	0.21	11	8.26	1.54	161.614	TRUE	FALSE	FALSE	25.83
108.4	34.3	陕西省	咸阳	13.7	560	200	3	5.97448	1.09	0.14	12	8.3	1.44	177.138	TRUE	FALSE	FALSE	25.6
108.4	34.3	陕西省	咸阳	13.7	570	0	3	5.97448	1.09	0.14	12	8.3	1.4	177.138	TRUE	FALSE	FALSE	21.83
108.2	34.15	陕西省	西安	12	675	220	3	6.1	0.31	0.301	12	8.01	1.41	136.531	TRUE	FALSE	FALSE	20.1
108.083	34.3	陕西省	咸阳	12.9	660	158	3	7.79	0.58	0.21	11	8.26	1.54	162	TRUE	FALSE	FALSE	18.98
108.1	34.3	陕西省	咸阳	13.9	749	300	3	13.28	0.81	0.22	11	8.12	1.41	161.365	FALSE	FALSE	TRUE	18.22
108.104	34.3113	陕西省	咸阳	13.06	563.13	180	3	7.70302	0.91	0.2578	12	8.03	1.40996	162.967	FALSE	FALSE	TRUE	16.52
108.104	34.3113	陕西省	咸阳	13	563.1	180	3	7.71462	0.9	0.258	12	8	1.3	162.967	FALSE	FALSE	TRUE	16.52
108.1	34.3	陕西省	咸阳	13.9	749	0	3	13.28	0.81	0.22	11	8.12	1.41	161.365	FALSE	FALSE	TRUE	16.29
108.957	34.2256	陕西省	西安	23.8	417	124	5	8.82	0.4	0.21	11	7.9	1.41	183	FALSE	FALSE	TRUE	16.1
108.167	34.35	陕西省	咸阳	12	637	226.5	2	12.65	1.24	0.255	12	7.89	1.41	171.39	FALSE	FALSE	TRUE	15.16
108.957	34.2256	陕西省	西安	23.8	417	114	5	8.82	0.4	0.21	11	7.9	1.41	183	FALSE	FALSE	TRUE	14.4
108.4	34.3333	陕西省	咸阳	12.9	550	270	6	6.47912	0.95	0.255	12	7.82	1.41	183.816	TRUE	FALSE	FALSE	14.37
108.104	34.3113	陕西省	咸阳	13	563.1	144	3	7.71462	0.9	0.258	12	8	1.3	163	FALSE	FALSE	TRUE	14
108.167	34.35	陕西省	咸阳	12	637	226.5	2	12.65	1.24	0.255	12	7.89	1.41	171.39	FALSE	FALSE	TRUE	13.17
108.104	34.3113	陕西省	咸阳	13.06	563.13	180	3	7.70302	0.91	0.2578	12	8.03	1.40996	162.967	FALSE	FALSE	TRUE	12.79
108.104	34.3113	陕西省	咸阳	13	563.1	180	3	7.71462	0.9	0.258	12	8	1.3	162.967	FALSE	FALSE	TRUE	12.79
108.1	34.3	陕西省	咸阳	13.9	749	300	3	13.28	0.81	0.22	11	8.12	1.41	161.365	TRUE	FALSE	FALSE	12.46
108.067	34.2833	陕西省	咸阳	12.9	550	200	3	8.39907	0.77	0.22	11	7.8	1.4	157.736	FALSE	FALSE	TRUE	12.36
108.167	34.35	陕西省	咸阳	12	637	226.5	2	12.65	1.24	0.255	12	7.89	1.41	171.39	FALSE	FALSE	TRUE	12.05
108.104	34.3113	陕西省	咸阳	13	563.1	144	3	7.71462	0.9	0.258	12	8	1.3	163	FALSE	FALSE	TRUE	11.74
108.1	34.3	陕西省	咸阳	13.9	749	0	3	13.28	0.81	0.22	11	8.12	1.41	161.365	TRUE	FALSE	FALSE	11.59
108.104	34.3113	陕西省	咸阳	13	563.1	180	3	7.71462	0.9	0.258	12	8	1.3	162.967	FALSE	FALSE	TRUE	11.2
108.104	34.3113	陕西省	咸阳	13	563.1	180	3	7.71462	0.9	0.258	12	8	1.3	162.967	FALSE	FALSE	TRUE	11.19
108.104	34.3113	陕西省	咸阳	13	563.1	180	3	7.71462	0.9	0.258	12	8	1.3	162.967	FALSE	FALSE	TRUE	10.75
108.104	34.3113	陕西省	咸阳	13	563.1	144	3	7.71462	0.9	0.258	12	8	1.3	163	FALSE	FALSE	TRUE	10.23
108.08	34.2459	陕西省	咸阳	12	600	0	3	7.05	1.18	0.21	11	7.9	1.41	149.51	TRUE	FALSE	FALSE	10.17
108.083	34.3	陕西省	咸阳	12.9	660	180	3	7.79	0.58	0.21	11	8.26	1.54	161.614	FALSE	FALSE	TRUE	10.06
108.104	34.3113	陕西省	咸阳	13	563.1	144	3	7.71462	0.9	0.258	12	8	1.3	163	FALSE	FALSE	TRUE	9.63
108.067	34.2939	陕西省	咸阳	12	648	200	3	7.05	1.18	0.165	11	7.9	1.25	159.894	TRUE	FALSE	FALSE	9.61
108.104	34.3113	陕西省	咸阳	13	563.1	144	3	7.71462	0.9	0.258	12	8	1.3	163	FALSE	FALSE	TRUE	8.83
108.104	34.3113	陕西省	咸阳	13.06	563.13	0	3	7.70302	0.91	0.2578	12	8.03	1.40996	162.967	FALSE	FALSE	TRUE	7.8
108.104	34.3113	陕西省	咸阳	13	563.1	0	3	7.71462	0.9	0.258	12	8	1.3	162.967	FALSE	FALSE	TRUE	7.8
108.104	34.3113	陕西省	咸阳	13	563.1	180	3	7.71462	0.9	0.258	12	8	1.3	162.967	FALSE	FALSE	TRUE	7.67
108.104	34.3113	陕西省	咸阳	13	563.1	0	3	7.71462	0.9	0.258	12	8	1.3	162.967	FALSE	FALSE	TRUE	7.4
108.104	34.3113	陕西省	咸阳	13.06	563.13	0	3	7.70302	0.91	0.2578	12	8.03	1.40996	162.967	FALSE	FALSE	TRUE	7.29
108.104	34.3113	陕西省	咸阳	13	563.1	0	3	7.71462	0.9	0.258	12	8	1.3	162.967	FALSE	FALSE	TRUE	7.29
108.07	34.2931	陕西省	咸阳	12	648	180	6	9.83	0.88	0.21	11	8.3	1.33	159.756	FALSE	FALSE	TRUE	7.23
108.104	34.3113	陕西省	咸阳	13	563.1	0	3	7.71462	0.9	0.258	12	8	1.3	162.967	FALSE	FALSE	TRUE	7.01
108.104	34.3113	陕西省	咸阳	13	563.1	144	3	7.71462	0.9	0.258	12	8	1.3	163	FALSE	FALSE	TRUE	6.59
108.067	34.2939	陕西省	咸阳	12	648	0	3	7.05	1.18	0.165	11	7.9	1.25	159.894	TRUE	FALSE	FALSE	4.78
108.07	34.2931	陕西省	咸阳	12	648	0	6	9.83	0.88	0.21	11	8.3	1.33	159.756	FALSE	FALSE	TRUE	4.74
108.067	34.3	陕西省	咸阳	13	575	180	3	8.47	0.910103	0.21	11	8	1.26	162.067	FALSE	FALSE	TRUE	4.68
108.104	34.3113	陕西省	咸阳	13	563.1	0	3	7.71462	0.9	0.258	12	8	1.3	162.967	FALSE	FALSE	TRUE	3.94
108.104	34.3113	陕西省	咸阳	13	563.1	0	3	7.71462	0.9	0.258	12	8	1.3	162.967	FALSE	FALSE	TRUE	3.67
108.067	34.2833	陕西省	咸阳	12.9	701.856	225	3	4.51856	1.4	0.22	11	8.26	1.41	157.736	TRUE	FALSE	FALSE	3.44
108.067	34.3	陕西省	咸阳	12	647	0	3	11.9	0.73	0.25	11	8.02	1.41	162.067	TRUE	FALSE	FALSE	2.5
108.2	34.15	陕西省	西安	12	675	0	3	5.8	0.35	0.205	12	7.96	1.41	136.531	TRUE	FALSE	FALSE	1.9
108.2	34.15	陕西省	西安	12	675	0	3	6.1	0.31	0.301	12	8.01	1.41	136.531	TRUE	FALSE	FALSE	1.8
108.013	34.2975	陕西省	咸阳	12.9	575	165	3	8.7587	0.68	0.267	12	7.8	1.34	162.937	FALSE	FALSE	TRUE	1.54
108.067	34.3	陕西省	咸阳	13	575	0	3	8.47	0.910103	0.21	11	8	1.26	162.067	FALSE	FALSE	TRUE	1.5
108.067	34.3	陕西省	咸阳	13	575	0	3	8.47	0.910103	0.21	11	8	1.26	162.067	FALSE	FALSE	TRUE	1.29
108.013	34.2975	陕西省	咸阳	12.9	575	180	3	8.7587	0.68	0.267	12	7.8	1.34	162.937	TRUE	FALSE	FALSE	0.66
108.013	34.2975	陕西省	咸阳	12.9	575	0	3	8.7587	0.68	0.267	12	7.8	1.34	162.937	TRUE	FALSE	FALSE	0.58
108.013	34.2975	陕西省	咸阳	12.9	575	0	3	8.7587	0.68	0.267	12	7.8	1.34	162.937	FALSE	FALSE	TRUE	0.16
126.617	45.6833	黑龙江省	哈尔滨	3	523.3	300	3	7.02	1.14	0.23	20	6.8	1.4	12.5317	TRUE	FALSE	FALSE	18.85
126.617	45.6833	黑龙江省	哈尔滨	3	523.3	225	3	7.02	1.14	0.23	20	6.8	1.4	13	TRUE	FALSE	FALSE	14.56
126.617	45.6833	黑龙江省	哈尔滨	3	523.3	225	3	7.02	1.14	0.23	20	6.8	1.4	13	TRUE	FALSE	FALSE	12.52
126.734	45.7423	黑龙江省	哈尔滨	3	538	187.5	4	16.7633	0.3	0.23	20	6.39	1.24	21.2263	TRUE	FALSE	FALSE	10.86
133	45.33	黑龙江省	鸡西	3	551	224.55	3	35.4988	1.62	0.2331	17	6.92	1.26	25.363	FALSE	TRUE	FALSE	7.83
133	45.33	黑龙江省	鸡西	3	551	179.7	3	35.4988	1.62	0.2331	17	6.92	1.26	25	FALSE	TRUE	FALSE	6.55
126.617	45.6833	黑龙江省	哈尔滨	3	523.3	0	3	7.02	1.14	0.23	20	6.8	1.4	12.5317	TRUE	FALSE	FALSE	5.38
133	45.33	黑龙江省	鸡西	3	551	0	3	35.4988	1.62	0.2331	17	6.92	1.26	25.363	FALSE	TRUE	FALSE	2.49

## Sheet: LTN
Longitude	Latitude	Province	Prefecture	Tem	Pre	rate	n	SOC	TN	Clay	CEC	pH	BD	irrigation	Maize	Rice	Wheat	LTN
121.75	30.87	上海市	奉贤	15	1178	375	3	7.5406	1.47	0.2025	11	7.9	1.39	170	FALSE	TRUE	FALSE	17.84
121.75	30.87	上海市	奉贤	15	1178	0	3	7.5406	1.47	0.2025	11	7.9	1.39	170	FALSE	TRUE	FALSE	14.12
121.033	30.9689	上海市	青浦	15.6	1178.2	300	3	16.6589	1.2	0.463582	10	4.38215	1.25565	322.178	FALSE	TRUE	FALSE	9.02
121.033	30.9689	上海市	青浦	15.6	1178.2	0	3	16.6589	1.2	0.463582	10	4.38215	1.25565	322.178	FALSE	TRUE	FALSE	4.71
121.017	31.0167	上海市	青浦	17.6	1269.3	300	3	13.5731	1.26	0.183	10	7.2	1.27	271.669	FALSE	TRUE	FALSE	10.32
121.017	31.0167	上海市	青浦	17.6	1269.3	300	3	13.5731	1.26	0.183	10	7.2	1.27	271.669	FALSE	TRUE	FALSE	11.29
121.017	31.0167	上海市	青浦	17.6	1269.3	0	3	13.5731	1.26	0.183	10	7.2	1.27	271.669	FALSE	TRUE	FALSE	4.51
121.017	31.0167	上海市	青浦	17.6	1269.3	0	3	13.5731	1.26	0.183	10	7.2	1.27	271.669	FALSE	TRUE	FALSE	5.01
121.122	31.1612	上海市	青浦	15	1149	255	3	11.2	1.52	0.216	11	7.8	1.41	344.595	FALSE	FALSE	TRUE	39.177
121.122	31.1612	上海市	青浦	15	1149	300	3	11.2	1.52	0.216	11	7.8	1.41	344.595	FALSE	TRUE	FALSE	30.57
121.133	31.2	上海市	青浦	16.7	1087.3	300	3	14.8144	1.15	0.440273	10	7.18	1.29	334.889	FALSE	TRUE	FALSE	2.98
121.133	31.2	上海市	青浦	16.7	1087.3	300	3	14.8144	1.15	0.440273	10	7.18	1.29	334.889	FALSE	TRUE	FALSE	6.13
121.133	31.2	上海市	青浦	16.7	1087.3	0	3	14.8144	1.15	0.440273	10	7.18	1.29	334.889	FALSE	TRUE	FALSE	1.04
121.133	31.2	上海市	青浦	16.7	1087.3	0	3	14.8144	1.15	0.440273	10	7.18	1.29	334.889	FALSE	TRUE	FALSE	1.57
121.133	31.2	上海市	青浦	15.6	1178.2	300	3	11.1485	1.49	0.245	10	7.57	1.3	334.889	FALSE	TRUE	FALSE	4.52
121.133	31.2	上海市	青浦	15.6	1178.2	300	3	11.1485	1.49	0.245	10	7.57	1.3	334.889	FALSE	TRUE	FALSE	4.93
121.133	31.2	上海市	青浦	16.7	1000	300	3	13.5209	1.2	0.245	10	7.02	1.37	334.889	FALSE	TRUE	FALSE	6.6
121.133	31.2	上海市	青浦	16.7	1000	300	3	13.5209	1.2	0.245	10	7.02	1.37	334.889	FALSE	TRUE	FALSE	10.34
121.133	31.2	上海市	青浦	15.6	1178.2	0	3	11.1485	1.49	0.245	10	7.57	1.3	334.889	FALSE	TRUE	FALSE	0.95
121.133	31.2	上海市	青浦	15.6	1178.2	0	3	11.1485	1.49	0.245	10	7.57	1.3	334.889	FALSE	TRUE	FALSE	1.09
121.133	31.2	上海市	青浦	16.7	1000	0	3	13.5209	1.2	0.245	10	7.02	1.37	334.889	FALSE	TRUE	FALSE	3.58
121.133	31.2	上海市	青浦	16.7	1000	0	3	13.5209	1.2	0.245	10	7.02	1.37	334.889	FALSE	TRUE	FALSE	6.51
121.3	31.25	上海市	嘉定	15.5	1100	180	3	20.3074	2.75	0.162	8.1	6.78	1.23	179.835	FALSE	TRUE	FALSE	9.26
121.3	31.25	上海市	嘉定	15.5	1100	180	3	20.3074	2.75	0.162	8.1	6.78	1.23	179.835	FALSE	TRUE	FALSE	10.08
121.3	31.25	上海市	嘉定	15.5	1100	270	3	20.3074	2.75	0.162	8.1	6.78	1.23	179.835	FALSE	TRUE	FALSE	7.62
121.3	31.25	上海市	嘉定	15.5	1100	270	3	20.3074	2.75	0.162	8.1	6.78	1.23	179.835	FALSE	FALSE	TRUE	22.6
121.3	31.25	上海市	嘉定	15.5	1100	0	3	20.3074	2.75	0.162	8.1	6.78	1.23	179.835	FALSE	TRUE	FALSE	1.04
121.3	31.25	上海市	嘉定	15.5	1100	0	3	20.3074	2.75	0.162	8.1	6.78	1.23	179.835	FALSE	FALSE	TRUE	3.6
100.117	25.8333	云南省	大理	15.1	1048	195	3	33.2367	3.3	0.23	13	7.1	1.31	64	FALSE	TRUE	FALSE	12.71
100.117	25.8333	云南省	大理	15.1	1048	0	3	33.2367	3.3	0.23	13	7.1	1.31	64	FALSE	TRUE	FALSE	5.19
100.17	25.89	云南省	大理	14.6	908.8	76.5	3	43.1555	4.8	0.2988	13	6.98	1.41	68	FALSE	TRUE	FALSE	6.82
100.17	25.89	云南省	大理	14.6	908.8	0	3	43.1555	4.8	0.2988	13	6.98	1.41	68	FALSE	TRUE	FALSE	2.48
100.174	25.8928	云南省	大理	14.6	1048	195	3	33.2367	3.3	0.22	13	7.1	1.34	36	FALSE	TRUE	FALSE	14.05
100.174	25.8928	云南省	大理	14.6	1048	0	3	33.2367	3.3	0.22	13	7.1	1.34	36	FALSE	TRUE	FALSE	8.69
107.042	40.4217	内蒙古自治区	巴彦淖尔	7.6	142.6	320	3	6.72854	0.468161	0.224714	11	7.99312	1.41092	31.8796	TRUE	FALSE	FALSE	18.95
107.042	40.4217	内蒙古自治区	巴彦淖尔	7.6	142.6	0	3	6.72854	0.468161	0.224714	11	7.99312	1.41092	31.8796	TRUE	FALSE	FALSE	3.35
107.042	40.4217	内蒙古自治区	巴彦淖尔	7.6	142.6	240	3	6.73	0.47	0.2247	11	7.99	1.41	32	TRUE	FALSE	FALSE	14.16
106.567	40.4333	内蒙古自治区	巴彦淖尔	7.9	136.8	487.5	3	7.42459	0.8	0.05	6	8.2	1.4	78	TRUE	FALSE	FALSE	122.26
106.567	40.4333	内蒙古自治区	巴彦淖尔	7.9	136.8	487.5	3	7.42459	0.8	0.05	6	8.2	1.4	78	TRUE	FALSE	FALSE	126.75
106.567	40.4333	内蒙古自治区	巴彦淖尔	7.9	136.8	0	3	7.42459	0.8	0.05	6	8.2	1.4	78	TRUE	FALSE	FALSE	12.4
106.567	40.4333	内蒙古自治区	巴彦淖尔	7.9	136.8	0	3	7.42459	0.8	0.05	6	8.2	1.4	78	TRUE	FALSE	FALSE	13.32
106.567	40.4333	内蒙古自治区	巴彦淖尔	7.9	136.5	204.6	3	7.42459	1.62	0.05	6	8.2	1.4	72	FALSE	FALSE	TRUE	54.46
106.567	40.4333	内蒙古自治区	巴彦淖尔	7.9	136.5	324.45	3	7.42459	1.62	0.05	6	8.2	1.4	72	TRUE	FALSE	FALSE	69.48
106.567	40.4333	内蒙古自治区	巴彦淖尔	7.9	136.5	324.45	3	7.42459	1.62	0.05	6	8.2	1.4	72	TRUE	FALSE	FALSE	87.08
106.567	40.4333	内蒙古自治区	巴彦淖尔	5	138.2	316.4	3	7	0.91	0.05	6	9.12	1.4	79	TRUE	FALSE	FALSE	31.4
106.567	40.4333	内蒙古自治区	巴彦淖尔	5	138.2	321.8	3	6.99536	0.91	0.05	6	9.12	1.4	79	TRUE	FALSE	FALSE	47.2
106.567	40.4333	内蒙古自治区	巴彦淖尔	5	128	345	3	4.3	1.63	0.05	6	8.2	1.4	65	FALSE	FALSE	TRUE	54.5
106.567	40.4333	内蒙古自治区	巴彦淖尔	5	128	456	3	4.3	1.63	0.05	6	8.2	1.4	65	TRUE	FALSE	FALSE	69.5
107.166	40.9111	内蒙古自治区	巴彦淖尔	7.7	143	240	3	7.68561	1.21	0.135	11	7.8	1.41	70.2966	TRUE	FALSE	FALSE	21.88
120.417	43.15	内蒙古自治区	赤峰	5.9	338.3	217.65	3	3.99	0.72	0.0493	3	8.22	1.51	50	TRUE	FALSE	FALSE	13.95
120.417	43.15	内蒙古自治区	赤峰	5.9	338.3	285	3	3.99297	0.72	0.049317	3	8.22	1.5069	50	TRUE	FALSE	FALSE	27.75
116	39.6	北京市	房山	11.6	687	150	3	9.22274	0.93	0.1976	6	8.3	1.36	164	FALSE	FALSE	TRUE	2.42
116	39.6	北京市	房山	11.6	687	150	3	9.22274	0.93	0.1976	6	8.3	1.36	164	TRUE	FALSE	FALSE	5.01
116	39.6	北京市	房山	11.6	687	300	3	9.22274	0.93	0.1976	6	8.3	1.36	164.301	FALSE	FALSE	TRUE	3.13
116	39.6	北京市	房山	11.6	687	300	3	9.22274	0.93	0.1976	6	8.3	1.36	164.301	TRUE	FALSE	FALSE	9.61
116	39.6	北京市	房山	11.6	687	0	3	9.22274	0.93	0.1976	6	8.3	1.36	164.301	TRUE	FALSE	FALSE	0.66
116	39.6	北京市	房山	11.6	687	0	3	9.22274	0.93	0.1976	6	8.3	1.36	164.301	FALSE	FALSE	TRUE	1.74
116.467	39.8	北京市	大兴	10	600	45	3	7.71462	0.8	0.28	16	8.1	1.31	140.77	FALSE	FALSE	TRUE	152.4
116.467	39.8	北京市	大兴	10	600	86	3	7.71462	0.8	0.28	16	8.1	1.31	140.77	FALSE	FALSE	TRUE	148.3
116.467	39.8	北京市	大兴	10	600	127.4	3	7.71462	0.8	0.28	16	8.1	1.31	140.77	FALSE	FALSE	TRUE	29.9
116.467	39.8	北京市	大兴	10	600	130.1	3	7.71462	0.8	0.28	16	8.1	1.31	140.77	FALSE	FALSE	TRUE	165.5
116.467	39.8	北京市	大兴	10	600	131.9	3	7.71462	0.8	0.28	16	8.1	1.31	140.77	FALSE	FALSE	TRUE	49
116.467	39.8	北京市	大兴	10	600	139	3	7.71462	0.8	0.28	16	8.1	1.31	140.77	FALSE	FALSE	TRUE	64.4
116.467	39.8	北京市	大兴	12.5	588.1	130	3	7.1	0.8	0.185	16	8.1	1.42	141	TRUE	FALSE	FALSE	10.6
116.467	39.8	北京市	大兴	12.5	588.1	130	3	7.1	0.8	0.185	16	8.1	1.42	141	TRUE	FALSE	FALSE	10.9
116.467	39.8	北京市	大兴	12.5	588.1	150	3	7.1	0.8	0.185	16	8.1	1.42	141	FALSE	FALSE	TRUE	1.6
116.467	39.8	北京市	大兴	12.5	588.1	150	3	7.1	0.8	0.185	16	8.1	1.42	141	FALSE	FALSE	TRUE	1.6
116.467	39.8	北京市	大兴	12.5	588.1	212	3	7.1	0.8	0.185	16	8.1	1.42	141	TRUE	FALSE	FALSE	27.7
116.467	39.8	北京市	大兴	12.5	588.1	260	3	7.1	0.8	0.184965	16	8.1	1.41616	140.773	TRUE	FALSE	FALSE	18.3
116.467	39.8	北京市	大兴	12.5	588.1	260	3	7.1	0.8	0.184965	16	8.1	1.41616	140.773	TRUE	FALSE	FALSE	33.9
116.467	39.8	北京市	大兴	12.5	588.1	260	3	7.1	0.8	0.184965	16	8.1	1.41616	140.773	TRUE	FALSE	FALSE	41.4
116.467	39.8	北京市	大兴	12.5	588.1	300	3	7.1	0.8	0.184965	16	8.1	1.41616	140.773	FALSE	FALSE	TRUE	3.2
116.467	39.8	北京市	大兴	12.5	588.1	300	3	7.1	0.8	0.184965	16	8.1	1.41616	140.773	FALSE	FALSE	TRUE	3.9
116.467	39.8	北京市	大兴	12.5	588.1	0	3	7.1	0.8	0.184965	16	8.1	1.41616	140.773	FALSE	FALSE	TRUE	0.1
116.467	39.8	北京市	大兴	12.5	588.1	0	3	7.1	0.8	0.184965	16	8.1	1.41616	140.773	FALSE	FALSE	TRUE	0.1
116.467	39.8	北京市	大兴	12.5	588.1	0	3	7.1	0.8	0.184965	16	8.1	1.41616	140.773	FALSE	FALSE	TRUE	0.4
116.467	39.8	北京市	大兴	12.5	588.1	0	3	7.1	0.8	0.184965	16	8.1	1.41616	140.773	TRUE	FALSE	FALSE	0.8
116.467	39.8	北京市	大兴	12.5	588.1	0	3	7.1	0.8	0.184965	16	8.1	1.41616	140.773	TRUE	FALSE	FALSE	1.4
116.467	39.8	北京市	大兴	12.5	588.1	0	3	7.1	0.8	0.184965	16	8.1	1.41616	140.773	TRUE	FALSE	FALSE	3.6
116.281	40.0233	北京市	海淀	11.5	640	240	3	15.4872	1.43	0.1725	14	8.25	1.32	201	FALSE	FALSE	TRUE	9.52383
116.281	40.0233	北京市	海淀	11.5	640	0	3	15.4872	1.43	0.1725	14	8.25	1.32	201	FALSE	FALSE	TRUE	5.46715
116.684	40.0738	北京市	顺义	11	640	180	3	26.7	1.43	0.192	6	8.3	1.32	211	FALSE	FALSE	TRUE	0.9
116.684	40.0738	北京市	顺义	11	640	180	3	26.7	1.43	0.192	6	8.3	1.32	211	TRUE	FALSE	FALSE	3
116.684	40.0738	北京市	顺义	11	640	180	3	26.7	1.43	0.192	6	8.3	1.32	211	FALSE	FALSE	TRUE	16.1
116.684	40.0738	北京市	顺义	11	640	180	3	26.7	1.43	0.192	6	8.3	1.32	211	FALSE	FALSE	TRUE	32.5
116.684	40.0738	北京市	顺义	11	640	260	3	26.7	1.43	0.192	6	8.3	1.32	211.041	FALSE	FALSE	TRUE	1.9
116.684	40.0738	北京市	顺义	11	640	260	3	26.7	1.43	0.192	6	8.3	1.32	211.041	TRUE	FALSE	FALSE	6.2
116.684	40.0738	北京市	顺义	11	640	260	3	26.7	1.43	0.192	6	8.3	1.32	211.041	FALSE	FALSE	TRUE	36
116.684	40.0738	北京市	顺义	11	640	260	3	26.7	1.43	0.192	6	8.3	1.32	211.041	FALSE	FALSE	TRUE	53.8
116.684	40.0738	北京市	顺义	11	640	0	3	4.09991	1.43	0.192	6	8.3	1.32	211.041	TRUE	FALSE	FALSE	3.8314
116.684	40.0738	北京市	顺义	11	640	0	3	4.09991	1.43	0.192	6	8.3	1.32	211.041	FALSE	FALSE	TRUE	4.59475
116.233	40.2167	北京市	昌平	11	600	150	3	6.61253	0.69	0.184	13.8	8.6	1.32	62.4836	TRUE	FALSE	FALSE	1.69
116.25	40.2167	北京市	昌平	13	530	240	3	3.81	0.757	0.102	6	8.26	1.44533	210	TRUE	FALSE	FALSE	31.49
116.25	40.2167	北京市	昌平	13	530	240	3	3.81	0.757	0.102	6	8.26	1.44533	210	TRUE	FALSE	FALSE	61.38
116.25	40.2167	北京市	昌平	13	530	0	3	3.81	0.757	0.102	6	8.26	1.44533	210	TRUE	FALSE	FALSE	0.76
116.25	40.2167	北京市	昌平	13	530	0	3	3.81	0.757	0.102	6	8.26	1.44533	210	TRUE	FALSE	FALSE	1.97
116.497	40.3869	北京市	怀柔	14.5	700	240	3	9	0.765342	0.169	16	8	1.41	51.9217	TRUE	FALSE	FALSE	95.76
116.497	40.3869	北京市	怀柔	14.5	700	0	3	9	0.765342	0.169	16	8	1.41	51.9217	TRUE	FALSE	FALSE	20.81
124.823	43.5047	吉林省	长春	6	550	247.5	4	13.5151	1.53	0.3105	20	7.6	1.2	18.5458	TRUE	FALSE	FALSE	13.6001
124.823	43.5047	吉林省	长春	6	550	0	4	13.5151	1.53	0.3105	20	7.6	1.2	18.5458	TRUE	FALSE	FALSE	8.36244
124.802	43.5146	吉林省	长春	4.5	623	180	3	19.5	1.33899	0.23	20	6.4	1.3	42	TRUE	FALSE	FALSE	4.89
124.802	43.5146	吉林省	长春	4.5	623	0	3	19.5	1.33899	0.23	20	6.4	1.3	42	TRUE	FALSE	FALSE	4.96
125.4	43.8	吉林省	长春	5	570.3	240	3	17.152	1.68	0.23	20	6.63	1.3	23.8732	TRUE	FALSE	FALSE	1.18
125.4	43.8	吉林省	长春	5	570.3	0	3	17.152	1.68	0.23	20	6.63	1.3	23.8732	TRUE	FALSE	FALSE	0.37
125.405	43.8125	吉林省	长春	5	603	200	3	17.15	1.68	0.23	20	6.63	1.3	25	TRUE	FALSE	FALSE	3.79
125.405	43.8125	吉林省	长春	5	603	240	3	17.152	1.68	0.23	20	6.63	1.3	24.6008	TRUE	FALSE	FALSE	5.01
125.405	43.8125	吉林省	长春	5	603	0	3	17.152	1.68	0.23	20	6.63	1.3	24.6008	TRUE	FALSE	FALSE	0.23
125.404	43.8146	吉林省	长春	4.8	520	240	3	17.0766	1.58	0.295	20	6.7	1.3	24.6008	TRUE	FALSE	FALSE	1.1768
125.404	43.8146	吉林省	长春	4.8	520	0	3	17.0766	1.58	0.295	20	6.7	1.3	24.6008	TRUE	FALSE	FALSE	0.3641
102.967	29.9667	四川省	雅安	23	1479	180	3	17.98	2.1	0.2053	19.5	5.8	1.36	71	TRUE	FALSE	FALSE	21.1
102.967	29.9667	四川省	雅安	23	1479	180	3	17.98	2.1	0.2053	19.5	5.8	1.36	71	TRUE	FALSE	FALSE	28.3
102.967	29.9667	四川省	雅安	23	1479	360	3	17.9814	2.1	0.20534	19.5	5.8	1.35874	71	TRUE	FALSE	FALSE	103
102.967	29.9667	四川省	雅安	23	1479	360	3	17.9814	2.1	0.20534	19.5	5.8	1.35874	71	TRUE	FALSE	FALSE	116
104.57	30.0867	四川省	资阳	16.8	965.8	300	3	5.33643	0.53	0.449	12	7.9	1.3	50.0727	TRUE	FALSE	FALSE	25.7
104.57	30.0867	四川省	资阳	16.8	965.8	0	3	5.33643	0.53	0.449	12	7.9	1.3	50.0727	TRUE	FALSE	FALSE	5.6
104.57	30.0867	四川省	资阳	16.8	965.8	0	3	5.33643	0.53	0.449	12	7.9	1.3	50.0727	TRUE	FALSE	FALSE	5.6
104.602	30.1002	四川省	资阳	16	944	300	3	5.33643	0.53	0.449	12	7.9	1.4	51.2029	TRUE	FALSE	FALSE	9.68
104.602	30.1002	四川省	资阳	16	944	300	3	5.33643	0.53	0.449	12	7.9	1.4	51.2029	TRUE	FALSE	FALSE	15.51
105.067	30.175	四川省	资阳	16	1025	220	3	7.5	0.86	0.164	17	8.52	1.37	116	FALSE	TRUE	FALSE	10.43
105.067	30.175	四川省	资阳	16	1025	220	3	7.5	0.82	0.296	26.3	8.15	1.37	116	FALSE	FALSE	TRUE	14.78
105.067	30.175	四川省	资阳	16	1025	0	3	7.5	0.86	0.164	17	8.52	1.37	116	FALSE	TRUE	FALSE	4.48
105.067	30.175	四川省	资阳	16	1025	0	3	7.5	0.82	0.296	26.3	8.15	1.37	116	FALSE	FALSE	TRUE	7.28
106.43	30.43	四川省	广安	16	1117	225	2	7.65661	2.32	0.503	12	7.2	1.35	64.4848	FALSE	FALSE	TRUE	7.46
106.43	30.43	四川省	广安	16	1117	225	2	7.07657	2.32	0.546	12	7.7	1.35	64.4848	FALSE	FALSE	TRUE	7.66
106.43	30.43	四川省	广安	16	1117	225	2	7.65661	2.32	0.503	12	7.2	1.35	64.4848	FALSE	FALSE	TRUE	7.71
106.43	30.43	四川省	广安	16	1117	225	2	7.07657	2.32	0.546	12	7.7	1.35	64.4848	FALSE	FALSE	TRUE	7.92
106.43	30.43	四川省	广安	16	1117	225	2	6.96056	2.32	0.37	12	5.2	1.35	64.4848	FALSE	FALSE	TRUE	7.98
106.43	30.43	四川省	广安	16	1117	225	2	6.96056	2.32	0.37	12	5.2	1.35	64.4848	FALSE	FALSE	TRUE	9.25
106.43	30.43	四川省	广安	16	1117	0	2	7.65661	2.32	0.503	12	7.2	1.35	64.4848	FALSE	FALSE	TRUE	3.15
106.43	30.43	四川省	广安	16	1117	0	2	6.96056	2.32	0.37	12	5.2	1.35	64.4848	FALSE	FALSE	TRUE	3.7
106.43	30.43	四川省	广安	16	1117	0	2	7.07657	2.32	0.546	12	7.7	1.35	64.4848	FALSE	FALSE	TRUE	3.89
106.433	30.4333	四川省	广安	18.3	1115.8	180	3	9.4	0.86	0.5031	23.7	6.56	1.3	64	TRUE	FALSE	FALSE	10.93
106.433	30.4333	四川省	广安	18.3	1115.8	225	3	9.39675	0.86	0.5031	23.7	6.56	1.3	64.4848	TRUE	FALSE	FALSE	21.64
106.433	30.4333	四川省	广安	18.3	1115.8	0	3	9.39675	0.86	0.5031	23.7	6.56	1.3	64.4848	TRUE	FALSE	FALSE	3.29
105.467	31.2666	四川省	绵阳	17.3	826	130	3	6.35	0.55	0.21	17	8.3	1.32	26.6953	FALSE	FALSE	TRUE	1.35
105.467	31.2666	四川省	绵阳	17.3	826	150	3	6.35	0.55	0.21	17	8.3	1.32	26.6953	TRUE	FALSE	FALSE	62.14
105.467	31.2666	四川省	绵阳	17.3	826	0	3	6.35	0.55	0.21	17	8.3	1.32	26.6953	FALSE	FALSE	TRUE	0.27
105.467	31.2666	四川省	绵阳	17.3	826	0	3	6.35	0.55	0.21	17	8.3	1.32	26.6953	TRUE	FALSE	FALSE	3.13
105.45	31.2667	四川省	绵阳	17.3	826	150	3	5.07541	0.62	0.35	17	8.83	1.37	25.5773	TRUE	FALSE	FALSE	23.04
105.45	31.2667	四川省	绵阳	17.3	826	0	3	5.07541	0.62	0.35	17	8.83	1.37	25.5773	TRUE	FALSE	FALSE	2.73
105.45	31.2667	四川省	绵阳	17.3	826	150	3	6.57193	0.75	0.215	17	8.36	1.54	56	TRUE	FALSE	FALSE	87.7
105.45	31.2667	四川省	绵阳	17.3	948	280	3	5.07541	0.81	0.223	17	8.2	1.34	25.5773	TRUE	FALSE	FALSE	3.77
105.45	31.2667	四川省	绵阳	17.3	948	0	3	5.07541	0.81	0.223	17	8.2	1.34	25.5773	TRUE	FALSE	FALSE	4.48
105.467	31.2667	四川省	绵阳	17.3	826	130	3	6.35	0.55	0.129	17	8.3	1.32	39	FALSE	FALSE	TRUE	1.35
105.467	31.2667	四川省	绵阳	17.3	826	150	3	6.35	0.55	0.129	17	8.3	1.32	39	TRUE	FALSE	FALSE	62.14
105.467	31.2667	四川省	绵阳	17.3	826	280	3	6.35	0.55	0.129	17	8.3	1.32	80	TRUE	FALSE	FALSE	72.05
105.467	31.2667	四川省	绵阳	17.3	826	0	3	6.35	0.55	0.129	17	8.3	1.32	39	FALSE	FALSE	TRUE	0.27
105.467	31.2667	四川省	绵阳	17.3	826	0	3	6.35	0.55	0.129	17	8.3	1.32	39	TRUE	FALSE	FALSE	3.13
105.467	31.2667	四川省	绵阳	17.3	826	0	3	6.35	0.55	0.129	17	8.3	1.32	80	TRUE	FALSE	FALSE	6.15
105.45	31.2667	四川省	绵阳	17.3	826	150	3	5.07541	0.62	0.21	17	8.83	1.37	25.5773	TRUE	FALSE	FALSE	27.67
105.467	31.2667	四川省	绵阳	17.3	1157	280	3	7.48	0.84	0.21	17	7.83	1.37	26.6953	TRUE	FALSE	FALSE	71.28
106.467	31.2833	四川省	南充	17.3	826	130	3	4.21	0.25	0.391	11	8	1.39	65.0557	TRUE	FALSE	FALSE	73.2
106.467	31.2833	四川省	南充	17.3	824	310	3	6.35	0.55	0.192	11	8.3	1.32	65.0557	TRUE	FALSE	FALSE	32.27
106.8	35.85	宁夏回族自治区	固原	8.1	410.2	285	3	8.2	1.07	0.151	16	7.59	1.33	120	TRUE	FALSE	FALSE	18
106.8	35.85	宁夏回族自治区	固原	8.1	410.2	285	3	8.2	1.07	0.151	16	7.59	1.33	120	TRUE	FALSE	FALSE	26.7
106.8	35.85	宁夏回族自治区	固原	8.1	410.2	285	3	8.2	1.07	0.151	16	7.59	1.33	120	TRUE	FALSE	FALSE	33
106.21	37.99	宁夏回族自治区	吴忠	8.9	192.9	345	3	8.17865	1.24	0.1546	11	8.3	1.5	101	FALSE	TRUE	FALSE	31.76
106.21	37.99	宁夏回族自治区	吴忠	8.9	192.9	0	3	8.17865	1.24	0.1546	11	8.3	1.5	101	FALSE	TRUE	FALSE	9.63
106.205	38.0037	宁夏回族自治区	吴忠	7	190	450	3	8.07	0.72	0.21	11	8.33	1.41	70	TRUE	FALSE	FALSE	35.9
106.205	38.0037	宁夏回族自治区	吴忠	7	190	525	3	8.06845	0.72	0.21	11	8.33	1.41	70.2153	TRUE	FALSE	FALSE	53.1
106.25	38.0167	宁夏回族自治区	吴忠	6	190	450	3	9.6	0.91	0.21	11	8.04	1.41	59	TRUE	FALSE	FALSE	23.1
106.25	38.0167	宁夏回族自治区	吴忠	6	190	450	3	9.6	0.91	0.21	11	8.04	1.41	59	TRUE	FALSE	FALSE	24.3
106.25	38.0167	宁夏回族自治区	吴忠	6	190	450	3	9.6	0.91	0.21	11	8.04	1.41	59	TRUE	FALSE	FALSE	41.3
106.25	38.0167	宁夏回族自治区	吴忠	6	190	525	3	9.59977	0.91	0.21	11	8.04	1.41	58.7078	TRUE	FALSE	FALSE	31.1
106.25	38.0167	宁夏回族自治区	吴忠	6	190	525	3	9.59977	0.91	0.21	11	8.04	1.41	58.7078	TRUE	FALSE	FALSE	31.8
106.25	38.0167	宁夏回族自治区	吴忠	6	190	525	3	9.59977	0.91	0.21	11	8.04	1.41	58.7078	TRUE	FALSE	FALSE	57.6
106.28	38.12	宁夏回族自治区	银川	8.9	192.9	300	3	8.81671	1.02	0.1546	11	8.3	1.47	101	FALSE	TRUE	FALSE	39.9
106.28	38.12	宁夏回族自治区	银川	8.9	192.9	300	3	8.81671	1.02	0.1546	11	8.3	1.47	101	FALSE	TRUE	FALSE	44.51
106.28	38.12	宁夏回族自治区	银川	8.9	192.9	0	3	8.81671	1.02	0.1546	11	8.3	1.47	101	FALSE	TRUE	FALSE	11.95
106.28	38.12	宁夏回族自治区	银川	8.9	192.9	0	3	8.81671	1.02	0.1546	11	8.3	1.47	101	FALSE	TRUE	FALSE	13.6
106.295	38.1206	宁夏回族自治区	银川	8.9	192.9	225	3	6.13689	0.98	0.1825	11	7.8	1.39	52.3427	FALSE	FALSE	TRUE	11.97
106.295	38.1206	宁夏回族自治区	银川	6	193	240	3	8.82251	0.98	0.1825	11	7.8	1.35	52.34	FALSE	TRUE	FALSE	30.58
106.295	38.1206	宁夏回族自治区	银川	6	193	240	3	8.82251	0.98	0.1825	11	7.8	1.35	52.34	FALSE	TRUE	FALSE	34.19
106.295	38.1206	宁夏回族自治区	银川	6	193	300	3	8.82251	0.98	0.1825	11	7.8	1.35	52.3427	FALSE	TRUE	FALSE	39.8
106.295	38.1206	宁夏回族自治区	银川	8.9	192.9	300	3	6.13689	0.98	0.1825	11	7.8	1.39	52.3427	FALSE	TRUE	FALSE	80.51
106.295	38.1206	宁夏回族自治区	银川	6	220	300	3	8.82251	0.98	0.1825	11	7.8	1.35	91	FALSE	TRUE	FALSE	32.62
106.295	38.1206	宁夏回族自治区	银川	6	220	300	3	8.82251	0.98	0.1825	11	7.8	1.35	91	FALSE	TRUE	FALSE	34.89
106.295	38.1206	宁夏回族自治区	银川	6	193	300	3	8.81671	1.02	0.182	11	7.8	1.47	52.3427	FALSE	TRUE	FALSE	39.89
106.295	38.1206	宁夏回族自治区	银川	6	220	0	3	8.82251	0.98	0.1825	11	7.8	1.35	91	FALSE	TRUE	FALSE	9.19
106.295	38.1206	宁夏回族自治区	银川	6	193	0	3	8.81671	1.02	0.182	11	7.8	1.47	52.3427	FALSE	TRUE	FALSE	11.95
106.295	38.1206	宁夏回族自治区	银川	6	220	0	3	8.82251	0.98	0.1825	11	7.8	1.35	91	FALSE	TRUE	FALSE	11.95
106.295	38.1206	宁夏回族自治区	银川	6	193	0	3	8.81671	1.02	0.182	11	7.8	1.47	52.3427	FALSE	TRUE	FALSE	13.6
106.291	38.1222	宁夏回族自治区	银川	8.9	192.9	240	3	8.82	1.02	0.35	11	8.21	1.47	52	FALSE	TRUE	FALSE	34.19
106.291	38.1222	宁夏回族自治区	银川	8.9	192.9	300	3	8.81671	1.02	0.35	11	8.21	1.47	52.3427	FALSE	TRUE	FALSE	44.51
106.291	38.1222	宁夏回族自治区	银川	8.9	192.9	0	3	8.81671	1.02	0.35	11	8.21	1.47	52.3427	FALSE	TRUE	FALSE	13.6
106.193	38.1239	宁夏回族自治区	吴忠	8.9	192.9	240	3	9.33875	0.9	0.21	11	8.49	1.41	92.2375	FALSE	TRUE	FALSE	23
106.298	38.1239	宁夏回族自治区	银川	6	193	300	3	8.39327	0.87	0.21	11	7.8	1.57	52.3427	FALSE	TRUE	FALSE	17.62
106.193	38.1239	宁夏回族自治区	吴忠	9.4	192.9	240	3	9.33875	1.08	0.1825	11	8.62	1.33	92.2375	FALSE	TRUE	FALSE	3.19
106.193	38.1239	宁夏回族自治区	吴忠	6	188	300	3	9.33875	0.9	0.23	11	8.49	1.41	92.2375	FALSE	TRUE	FALSE	29.02
106.193	38.1239	宁夏回族自治区	吴忠	6	192.9	300	3	9.33875	0.9	0.21	11	8.49	1.41	92.2375	FALSE	TRUE	FALSE	29.02
106.298	38.1239	宁夏回族自治区	银川	8.9	193	225	3	7.99304	0.87	0.21	11	8.59	1.49	52.3427	FALSE	FALSE	TRUE	8.97
106.298	38.1239	宁夏回族自治区	银川	8.9	193	225	3	7.99304	0.87	0.21	11	8.59	1.49	52.3427	FALSE	FALSE	TRUE	12.03
106.298	38.1239	宁夏回族自治区	银川	8.9	193	225	3	8.39327	0.87	0.21	11	7.8	1.57	52.3427	FALSE	FALSE	TRUE	12.59
106.298	38.1239	宁夏回族自治区	银川	8.9	193	225	3	7.99304	0.87	0.21	11	8.59	1.49	52.3427	FALSE	FALSE	TRUE	15.97
106.298	38.1239	宁夏回族自治区	银川	8.9	193	225	3	7.99304	0.87	0.21	11	8.59	1.49	52.3427	FALSE	FALSE	TRUE	17.65
106.299	38.1256	宁夏回族自治区	银川	8.9	192.9	240	3	7.96984	1.13	0.23	11	7.8	1.51	106	FALSE	TRUE	FALSE	36.89
106.299	38.1256	宁夏回族自治区	银川	8.9	192.9	300	3	7.96984	1.13	0.23	11	7.8	1.51	106	FALSE	TRUE	FALSE	43.51
106.299	38.1256	宁夏回族自治区	银川	8.9	192.9	0	3	7.96984	1.13	0.23	11	7.8	1.51	106	FALSE	TRUE	FALSE	12.37
106.199	38.1256	宁夏回族自治区	吴忠	8.9	180	240	3	7.35499	1.21	0.21	11	7.8	1.47	88.9562	FALSE	TRUE	FALSE	29.63
106.199	38.1256	宁夏回族自治区	吴忠	8.9	180	0	3	7.35499	1.21	0.21	11	7.8	1.47	88.9562	FALSE	TRUE	FALSE	8.47
106.267	38.1333	宁夏回族自治区	银川	8	190	240	3	8.12065	0.99	0.18	11	8.5	1.4	63	FALSE	TRUE	FALSE	43.68
106.267	38.1333	宁夏回族自治区	银川	8	190	240	3	8.12065	0.99	0.18	11	8.5	1.4	63	FALSE	TRUE	FALSE	61.37
106.267	38.1333	宁夏回族自治区	银川	8	190	300	3	8.12065	0.99	0.18	11	8.5	1.4	62.6968	FALSE	TRUE	FALSE	49.43
106.267	38.1333	宁夏回族自治区	银川	8	190	300	3	8.12065	0.99	0.18	11	8.5	1.4	62.6968	FALSE	TRUE	FALSE	69.32
106.267	38.1333	宁夏回族自治区	银川	8	190	0	3	8.12065	0.99	0.18	11	8.5	1.4	62.6968	FALSE	TRUE	FALSE	26.14
106.267	38.1333	宁夏回族自治区	银川	8	190	0	3	8.12065	0.99	0.18	11	8.5	1.4	62.6968	FALSE	TRUE	FALSE	27.59
106.23	38.22	宁夏回族自治区	银川	8.8	200	300	3	7.69142	1.17	0.35	1	8.21	1.43	75.218	FALSE	TRUE	FALSE	24.7
106.23	38.22	宁夏回族自治区	银川	8.8	200	0	3	7.69142	1.17	0.35	1	8.21	1.43	75.218	FALSE	TRUE	FALSE	7.93
106.371	38.8006	宁夏回族自治区	石嘴山	8.7	201.4	0	3	7.64501	0.61	0.209346	11	8.21	1.40824	74.9711	FALSE	TRUE	FALSE	11.07
106.371	38.8006	宁夏回族自治区	石嘴山	8.7	200	240	3	6.2297	1.01	0.184	11	7.8	1.36	102	FALSE	TRUE	FALSE	48.04
106.371	38.8006	宁夏回族自治区	石嘴山	8.7	200	0	3	6.2297	1.01	0.184	11	7.8	1.36	102	FALSE	TRUE	FALSE	20.3
106.537	38.9196	宁夏回族自治区	石嘴山	6	175	240	3	8.94	0.75	0.21	11	8.07	1.41	52	FALSE	FALSE	TRUE	22.14
106.537	38.9196	宁夏回族自治区	石嘴山	6	175	270	3	8.94432	0.75	0.21	11	8.07	1.41	52.1911	FALSE	FALSE	TRUE	36.07
106.537	38.9196	宁夏回族自治区	石嘴山	6	175	420	3	11.37	0.88	0.21	11	8.26	1.41	52	TRUE	FALSE	FALSE	29.8
106.537	38.9196	宁夏回族自治区	石嘴山	6	175	525	3	11.3747	0.88	0.21	11	8.26	1.41	52.1911	TRUE	FALSE	FALSE	47.1
106.788	39.2454	宁夏回族自治区	石嘴山	6	167	375	3	8.5	0.87	0.24	17	8.38	1.4	45	TRUE	FALSE	FALSE	29.9
106.788	39.2454	宁夏回族自治区	石嘴山	6	167	450	3	8.50348	0.87	0.24	17	8.38	1.4	45	TRUE	FALSE	FALSE	41.21
117.164	30.3639	安徽省	池州	13.2	803.7	218	3	5.40023	0.968	0.614	11	7.01	1.41	117.815	TRUE	FALSE	FALSE	41.42
116.933	31.4667	安徽省	六安	15.6	1171	210	3	14.5012	1.4	0.281	7	5.85	1.35	205.95	FALSE	TRUE	FALSE	9.83
116.933	31.4667	安徽省	六安	15.6	1171	210	3	14.5012	1.4	0.281	7	5.85	1.35	205.95	FALSE	TRUE	FALSE	10.69
117.68	31.6658	安徽省	合肥	16.8	1360	225	3	19.9304	1.3	0.49	11	6.18	1.41	165.887	FALSE	TRUE	FALSE	13.5
117.68	31.6658	安徽省	合肥	16.8	1360	0	3	19.9304	1.3	0.49	11	6.18	1.41	165.887	FALSE	TRUE	FALSE	5.74
117.086	31.8495	安徽省	合肥	15	1030	132	3	11.1999	1.21096	0.209999	11	7.79981	1.41001	229.035	FALSE	TRUE	FALSE	0.0125
117.086	31.8495	安徽省	合肥	15	1030	195	3	11.1999	1.21096	0.209999	11	7.79981	1.41001	229.035	TRUE	FALSE	FALSE	0.2125
115.742	32.5183	安徽省	阜阳	15	885	215.5	3	10.1218	0.84	0.363	7	6.8	1.38	108.422	FALSE	TRUE	FALSE	293.68
117.073	33.6936	安徽省	宿州	14	862.5	255	3	9.16	1.05	0.153	14	7.9	1.2	192	TRUE	FALSE	FALSE	35.9
117.073	33.6936	安徽省	宿州	14	862.5	255	3	10.33	1.05	0.271	14	7.6	1.12	192	TRUE	FALSE	FALSE	114.5
117.073	33.6936	安徽省	宿州	14	862.5	340	3	9.16473	1.05246	0.153	14	7.9	1.2	192	TRUE	FALSE	FALSE	60.6
117.073	33.6936	安徽省	宿州	14	862.5	340	3	10.3306	1.05246	0.271	14	7.6	1.12	192	TRUE	FALSE	FALSE	137.2
117.073	33.6936	安徽省	宿州	14	862.5	0	3	9.16473	1.05246	0.153	14	7.9	1.2	192	TRUE	FALSE	FALSE	18.5
117.073	33.6936	安徽省	宿州	14	862.5	0	3	10.3306	1.05246	0.271	14	7.6	1.12	192	TRUE	FALSE	FALSE	72.6
116.567	34.45	安徽省	宿州	13.7	650	240	3	8.87471	0.78	0.249	28	8.3	1.41	233.481	FALSE	FALSE	TRUE	0.61
116.567	34.45	安徽省	宿州	13.7	650	0	3	8.87471	0.78	0.249	28	8.3	1.41	233.481	FALSE	FALSE	TRUE	0.13
117.15	34.78	山东省	济宁	13	635	180	3	8.87	0.81	0.1814	14	8.3	1.38	153	FALSE	FALSE	TRUE	0.55
117.15	34.78	山东省	济宁	13	635	180	3	8.87	0.81	0.1814	14	8.3	1.38	153	TRUE	FALSE	FALSE	0.97
117.15	34.78	山东省	济宁	13	635	240	3	8.87471	0.81096	0.18144	14	8.3	1.37848	153.11	TRUE	FALSE	FALSE	1.17
117.15	34.78	山东省	济宁	13	635	345	3	8.87471	0.81096	0.18144	14	8.3	1.37848	153.11	FALSE	FALSE	TRUE	0.6
117.15	34.78	山东省	济宁	13	635	0	3	8.87471	0.81096	0.18144	14	8.3	1.37848	153.11	FALSE	FALSE	TRUE	0.13
117.15	34.78	山东省	济宁	13	635	0	3	8.87471	0.81096	0.18144	14	8.3	1.37848	153.11	TRUE	FALSE	FALSE	0.31
117.149	34.7828	山东省	济宁	13	772	345	3	7.00822	0.51	0.315	13	8.3	1.37848	153.11	TRUE	FALSE	FALSE	0.92
117.149	34.7828	山东省	济宁	13	772	0	3	7.00822	0.51	0.315	13	8.3	1.37848	153.11	TRUE	FALSE	FALSE	0.48
117.149	34.7828	山东省	济宁	13	772	180	3	7.01	0.51	0.315	13	8.3	1.38	153	TRUE	FALSE	FALSE	1.27
116.005	35.54	山东省	菏泽	13	628	180	3	7.59861	0.41	0.1	6	7.9	1.3	289	FALSE	FALSE	TRUE	61.464
117.15	36.15	山东省	泰安	12.8	697	180	3	5.78886	0.59	0.153	16	6.3	1.54	103.509	FALSE	FALSE	TRUE	2.76
117.15	36.15	山东省	泰安	12.8	697	180	3	5.83527	0.63	0.153	16	6.3	1.54	103.509	FALSE	FALSE	TRUE	6.52
117.15	36.15	山东省	泰安	12	718	180	3	6.2587	0.77	0.153	16	7.3	1.1	103.509	FALSE	FALSE	TRUE	8.2
117.15	36.15	山东省	泰安	12	718	180	3	6.2587	0.77	0.153	16	7.3	1.1	103.509	FALSE	FALSE	TRUE	15.4
117.15	36.15	山东省	泰安	12	697	200	3	6.5	0.94	0.153	16	7.3	1.54	103.509	TRUE	FALSE	FALSE	21.99
117.15	36.15	山东省	泰安	12	717	200	3	7.88863	1.4	0.243341	16	7.2	1.2	103.509	TRUE	FALSE	FALSE	58.9
117.15	36.15	山东省	泰安	12	718	200	3	7.88863	1.4	0.153	16	7.2	1.2	103.509	TRUE	FALSE	FALSE	58.9
117.15	36.15	山东省	泰安	12	717	200	3	7.88863	1.4	0.243341	16	7.2	1.2	103.509	TRUE	FALSE	FALSE	76.7
117.15	36.15	山东省	泰安	12	718	200	3	7.88863	1.4	0.153	16	7.2	1.2	103.509	TRUE	FALSE	FALSE	76.7
117.15	36.15	山东省	泰安	12.8	697	0	3	5.78886	0.59	0.153	16	6.3	1.54	103.509	FALSE	FALSE	TRUE	0.7
117.15	36.15	山东省	泰安	12.8	697	0	3	5.83527	0.63	0.153	16	6.3	1.54	103.509	FALSE	FALSE	TRUE	0.86
117.15	36.15	山东省	泰安	12	717	0	3	7.88863	1.4	0.243341	16	7.2	1.2	103.509	TRUE	FALSE	FALSE	10.5
117.15	36.15	山东省	泰安	12	718	0	3	7.88863	1.4	0.153	16	7.2	1.2	103.509	TRUE	FALSE	FALSE	10.5
117.15	36.15	山东省	泰安	12	717	0	3	7.88863	1.4	0.243341	16	7.2	1.2	103.509	TRUE	FALSE	FALSE	11.8
117.15	36.15	山东省	泰安	12	718	0	3	7.88863	1.4	0.153	16	7.2	1.2	103.509	TRUE	FALSE	FALSE	11.8
117.119	36.1939	山东省	泰安	13.5	700	240	3	6.80974	0.91	0.24	13	6.15	1.25	219	TRUE	FALSE	FALSE	20.44
117.119	36.1939	山东省	泰安	13.5	700	240	3	6.80974	0.91	0.24	13	6.15	1.25	219	TRUE	FALSE	FALSE	22.53
117.119	36.1939	山东省	泰安	13.5	700	0	3	6.80974	0.91	0.24	13	6.15	1.25	219	TRUE	FALSE	FALSE	12.9
117.119	36.1939	山东省	泰安	13.5	700	0	3	6.80974	0.91	0.24	13	6.15	1.25	219	TRUE	FALSE	FALSE	14.56
117.2	36.2833	山东省	泰安	12	697	180	3	6.33991	0.69	0.158	13	7.3	1.43	188	FALSE	FALSE	TRUE	4.89
117.217	36.3333	山东省	泰安	13	688	210	3	9.07193	1.13	0.203	13	7.3	1.43	343	FALSE	FALSE	TRUE	44.97
117.217	36.3333	山东省	泰安	13	688	225	3	6.61253	0.78	0.1198	13	7.28	1.43	343	FALSE	FALSE	TRUE	85.2
117.217	36.3333	山东省	泰安	13	688	225	3	6.61253	0.78	0.1198	13	7.28	1.43	343	TRUE	FALSE	FALSE	92.8
117.217	36.3333	山东省	泰安	13	586	300	3	10.6148	0.81	0.1403	13	8.35	1.43	343	TRUE	FALSE	FALSE	100.58
117.217	36.3333	山东省	泰安	12	880	300	3	7.4	1.14	0.097	13	6.5	1.43	343	TRUE	FALSE	FALSE	187.609
117.217	36.3333	山东省	泰安	12	880	450	3	7.4	1.14436	0.097	13	6.5	1.43	343	TRUE	FALSE	FALSE	279.384
117.217	36.3333	山东省	泰安	13	586	0	3	10.6148	0.81	0.1403	13	8.35	1.43	343	TRUE	FALSE	FALSE	6.58
117.217	36.3333	山东省	泰安	13	688	0	3	9.07193	1.13	0.203	13	7.3	1.43	343	FALSE	FALSE	TRUE	9.31
117.217	36.3333	山东省	泰安	13	688	0	3	6.61253	0.78	0.1198	13	7.28	1.43	343	FALSE	FALSE	TRUE	29.2
117.217	36.3333	山东省	泰安	12	880	0	3	7.4	1.14436	0.097	13	6.5	1.43	343	TRUE	FALSE	FALSE	60.5124
117.217	36.3333	山东省	泰安	13	688	0	3	6.61253	0.78	0.1198	13	7.28	1.43	343	TRUE	FALSE	FALSE	61
117.14	36.5	山东省	济南	13	700	165	3	12.993	0.91	0.21	16	7.96	1.48	185	FALSE	FALSE	TRUE	15
117.14	36.5	山东省	济南	13	700	431.25	3	12.993	0.91	0.21	16	7.96	1.48	185	TRUE	FALSE	FALSE	23.76
117.14	36.5	山东省	济南	13	700	0	3	12.993	0.91	0.21	16	7.96	1.48	185	FALSE	FALSE	TRUE	1.78
117.14	36.5	山东省	济南	13	700	0	3	12.993	0.91	0.21	16	7.96	1.48	185	TRUE	FALSE	FALSE	1.9
116.567	36.8333	山东省	德州	13	515	200	3	5.55	0.64	0.221	10	8.16	1.28	358	FALSE	FALSE	TRUE	22
116.567	36.8333	山东省	德州	13	515	200	3	5.55	0.64	0.221	10	8.16	1.28	358	FALSE	FALSE	TRUE	48
116.567	36.8333	山东省	德州	13	515	200	3	5.55	0.64	0.221	10	8.16	1.28	358	TRUE	FALSE	FALSE	58
116.567	36.8333	山东省	德州	13	515	200	3	5.55	0.64	0.221	10	8.16	1.28	358	TRUE	FALSE	FALSE	118
116.567	36.8333	山东省	德州	13	515	300	3	5.54524	0.64	0.221	10	8.16	1.28	358.28	FALSE	FALSE	TRUE	18
116.567	36.8333	山东省	德州	13	515	300	3	5.54524	0.64	0.221	10	8.16	1.28	358.28	FALSE	FALSE	TRUE	48
116.567	36.8333	山东省	德州	13	515	300	3	5.54524	0.64	0.221	10	8.16	1.28	358.28	TRUE	FALSE	FALSE	115
116.567	36.8333	山东省	德州	13	515	300	3	5.54524	0.64	0.221	10	8.16	1.28	358.28	TRUE	FALSE	FALSE	153
117.833	36.9	山东省	滨州	12.5	600	240	3	8.06	0.96	0.114	16	8	1.45	202	TRUE	FALSE	FALSE	14.5
117.833	36.9	山东省	滨州	12.5	600	330	3	8.06265	0.956671	0.114	16	8	1.45	202.45	TRUE	FALSE	FALSE	47.4
117.833	36.9	山东省	滨州	12.5	600	0	3	8.06265	0.956671	0.114	16	8	1.45	202.45	TRUE	FALSE	FALSE	35.9
118.003	36.956	山东省	淄博	12.35	542.8	300	3	8.58469	0.92	0.329	14.21	8.14	1.52	186.027	FALSE	FALSE	TRUE	27.5
118.003	36.956	山东省	淄博	12.35	542.8	300	3	8.58469	0.92	0.329	14.21	8.14	1.52	186.027	TRUE	FALSE	FALSE	71
118.003	36.956	山东省	淄博	12.35	542.8	300	3	8.58469	0.92	0.329	14.21	8.14	1.52	186.027	FALSE	FALSE	TRUE	74.2
118.003	36.956	山东省	淄博	12.35	542.8	300	3	8.58469	0.92	0.329	14.21	8.14	1.52	186.027	TRUE	FALSE	FALSE	98.46
118.003	36.956	山东省	淄博	12.35	542.8	200	3	8.58469	0.92	0.329	14.21	8.14	1.52	186.03	FALSE	FALSE	TRUE	13.5
118.003	36.956	山东省	淄博	12.35	542.8	200	3	8.58469	0.92	0.329	14.21	8.14	1.52	186.03	FALSE	FALSE	TRUE	40.9
118.003	36.956	山东省	淄博	12.35	542.8	200	3	8.58469	0.92	0.329	14.21	8.14	1.52	186.03	TRUE	FALSE	FALSE	41.2
118.003	36.956	山东省	淄博	12.35	542.8	200	3	8.58469	0.92	0.329	14.21	8.14	1.52	186.03	TRUE	FALSE	FALSE	48.1
117.987	36.9625	山东省	淄博	12.5	587	345	3	10.0928	0.8	0.329	6	7.7	1.44	186.305	FALSE	FALSE	TRUE	61.3
117.987	36.9625	山东省	淄博	12.5	587	345	3	10.0928	0.8	0.329	6	7.7	1.44	186.305	TRUE	FALSE	FALSE	173.9
116.322	37.4601	山东省	德州	12.9	547.5	255	3	7.63921	0.8	0.221787	13	8.59	1.36784	137.317	TRUE	FALSE	FALSE	2.62
116.322	37.4601	山东省	德州	12.9	547.5	315	3	7.63921	0.8	0.221787	13	8.59	1.36784	137.317	FALSE	FALSE	TRUE	0.55
116.322	37.4603	山东省	德州	12	567	240	3	6.14849	1.12	0.214	13	8.12	1.31	137.317	FALSE	FALSE	TRUE	53.5266
117.599	37.4724	山东省	滨州	10	600	130	3	8.87471	1.03	0.149	10	7.9	1.36	140.69	FALSE	FALSE	TRUE	115
113.333	23.1333	广东省	广州	21	1703	150	3	23.96	1.62	0.598	16	6	1.36	82	FALSE	TRUE	FALSE	9.26
113.333	23.1333	广东省	广州	21	1703	180	3	23.96	1.62	0.598	16	6	1.36	82	FALSE	TRUE	FALSE	13.6
113.333	23.1333	广东省	广州	21	1703	180	3	23.9559	1.62	0.598	16	6	1.36	82.2157	FALSE	TRUE	FALSE	17.13
113.333	23.1333	广东省	广州	21	1703	210	3	23.9559	1.62	0.598	16	6	1.36	82.2157	FALSE	TRUE	FALSE	18.6
113.333	23.1333	广东省	广州	21	1703	0	3	23.9559	1.62	0.598	16	6	1.36	82.2157	FALSE	TRUE	FALSE	5.08
113.333	23.1333	广东省	广州	21	1703	0	3	23.9559	1.62	0.598	16	6	1.36	82.2157	FALSE	TRUE	FALSE	7.1
120.8	31.2	江苏省	苏州	16	1139	280	4	20.26	1.82	0.21	11	5.3	1.25	133.612	FALSE	TRUE	FALSE	4.01
120.8	31.2	江苏省	苏州	16	1139	0	4	20.26	1.82	0.21	11	5.3	1.25	133.612	FALSE	TRUE	FALSE	0.97
120.962	31.2542	江苏省	苏州	15.5	1100	184.88	3	12.703	1.03	0.132	11	7.8	1.41	216.84	FALSE	TRUE	FALSE	3.33
120.962	31.2542	江苏省	苏州	15.5	1100	184.88	3	12.703	1.03	0.132	11	7.8	1.41	216.84	FALSE	TRUE	FALSE	7.34
120.962	31.2542	江苏省	苏州	15.5	1100	198	3	12.703	1.03	0.132	11	7.8	1.41	216.84	FALSE	TRUE	FALSE	3.99
120.962	31.2542	江苏省	苏州	15.5	1100	198	3	12.703	1.03	0.132	11	7.8	1.41	216.84	FALSE	TRUE	FALSE	8.11
120.962	31.2542	江苏省	苏州	15.5	1100	302.7	3	12.703	1.03	0.132	11	7.8	1.41	216.844	FALSE	TRUE	FALSE	6.47
120.962	31.2542	江苏省	苏州	15.5	1100	302.7	3	12.703	1.03	0.132	11	7.8	1.41	216.844	FALSE	TRUE	FALSE	11.6
120.962	31.2542	江苏省	苏州	15.5	1100	324.6	3	12.703	1.03	0.132	11	7.8	1.41	216.844	FALSE	TRUE	FALSE	5.29
120.962	31.2542	江苏省	苏州	15.5	1100	324.6	3	12.703	1.03	0.132	11	7.8	1.41	216.844	FALSE	TRUE	FALSE	14.4
120.962	31.2542	江苏省	苏州	15.5	1038	180	4	35	2.09	0.21	20.2	7.36	1.41	216.844	FALSE	FALSE	TRUE	13.82
120.962	31.2542	江苏省	苏州	15.5	1038	180	4	35	2.09	0.21	20.2	7.36	1.41	216.844	FALSE	FALSE	TRUE	15.3
120.962	31.2542	江苏省	苏州	15.5	1038	225	4	35	2.09	0.21	20.2	7.36	1.41	217	FALSE	TRUE	FALSE	4.34
120.962	31.2542	江苏省	苏州	15.5	1038	225	4	35	2.09	0.21	20.2	7.36	1.41	217	FALSE	TRUE	FALSE	7.57
120.962	31.2542	江苏省	苏州	15.5	1038	300	4	35	2.09	0.21	20.2	7.36	1.41	216.844	FALSE	TRUE	FALSE	7.47
120.962	31.2542	江苏省	苏州	15.5	1038	0	4	35	2.09	0.21	20.2	7.36	1.41	216.844	FALSE	FALSE	TRUE	0.91
120.962	31.2542	江苏省	苏州	15.5	1038	0	4	35	2.09	0.21	20.2	7.36	1.41	216.844	FALSE	FALSE	TRUE	2.15
120.962	31.2542	江苏省	苏州	15.5	1038	0	4	35	2.09	0.21	20.2	7.36	1.41	216.844	FALSE	TRUE	FALSE	3.06
120.962	31.2542	江苏省	苏州	15.5	1038	0	4	35	2.09	0.21	20.2	7.36	1.41	216.844	FALSE	TRUE	FALSE	4.74
119.9	31.2667	江苏省	无锡	15.7	1200	0	3	5.8	1.56	0.08	7	6.25	1.27	157.512	FALSE	TRUE	FALSE	2.95
120.974	31.2692	江苏省	苏州	15	1116	279	3	17.5754	1.8	0.373	10	7.4	1.26	238.265	FALSE	TRUE	FALSE	2.82
119.8	31.3	江苏省	无锡	15.7	1177	200	3	15.4	1.79	0.1733	11.8	5.6	1.28	191.413	FALSE	TRUE	FALSE	2.8024
119.8	31.3	江苏省	无锡	15.7	1177	200	3	15.4	1.79	0.1733	11.8	5.6	1.28	191.413	FALSE	TRUE	FALSE	3.1248
119.8	31.3	江苏省	无锡	15.7	1177	200	3	15.4	1.79	0.1733	11.8	5.6	1.28	191.413	FALSE	TRUE	FALSE	3.5464
119.8	31.3	江苏省	无锡	15.7	1177	200	3	15.4	1.79	0.1733	11.8	5.6	1.28	191.413	FALSE	TRUE	FALSE	4.8438
119.8	31.3	江苏省	无锡	15.7	1177	200	3	15.4	1.79	0.1733	11.8	5.6	1.28	191.413	FALSE	TRUE	FALSE	6.5286
119.8	31.3	江苏省	无锡	15.7	1177	200	3	15.4	1.79	0.1733	11.8	5.6	1.28	191.413	FALSE	TRUE	FALSE	8.19
119.8	31.3	江苏省	无锡	15.7	1177	200	3	15.4	1.79	0.1733	11.8	5.6	1.28	191.413	FALSE	TRUE	FALSE	9.2416
119.8	31.3	江苏省	无锡	15.7	1177	200	3	15.4	1.79	0.1733	11.8	5.6	1.28	191.413	FALSE	TRUE	FALSE	12.0064
119.8	31.3	江苏省	无锡	15.7	1177	200	3	15.4	1.79	0.1733	11.8	5.6	1.28	191.413	FALSE	TRUE	FALSE	15.2064
119.8	31.3	江苏省	无锡	15.7	1177	240	3	15.4	1.79	0.1733	11.8	5.6	1.28	191.413	FALSE	FALSE	TRUE	0.33462
119.8	31.3	江苏省	无锡	15.7	1177	240	3	15.4	1.79	0.1733	11.8	5.6	1.28	191.413	FALSE	FALSE	TRUE	5.82813
119.8	31.3	江苏省	无锡	15.7	1177	240	3	15.4	1.79	0.1733	11.8	5.6	1.28	191.413	FALSE	FALSE	TRUE	10.2726
119.9	31.3	江苏省	无锡	15	1281	270	4	7.30858	0.64	0.312	11	6.23	1.41607	172.213	FALSE	TRUE	FALSE	5.03
119.9	31.3	江苏省	无锡	15	1281	0	4	7.30858	0.64	0.312	11	6.23	1.41607	172.213	FALSE	TRUE	FALSE	3.35
120.41	31.32	江苏省	苏州	14.9	1054	300	3	20.4176	2.05	0.155461	6	7.4	1.41992	146.291	FALSE	TRUE	FALSE	8.57
120.93	31.3326	江苏省	苏州	15.5	1097.1	312.69	3	12.5928	1.79	0.24	10	7.4	1.32	257.628	FALSE	TRUE	FALSE	1.076
119.783	31.3667	江苏省	无锡	15.7	1277.1	140	3	13.9327	1.28	0.312	11	6.5	1.32	221.328	FALSE	FALSE	TRUE	9.4818
119.783	31.3667	江苏省	无锡	15.7	1277.1	140	3	16.1253	1.56	0.312	11	6.8	1.28	221.328	FALSE	FALSE	TRUE	9.80601
119.783	31.3667	江苏省	无锡	15.7	1277.1	140	3	13.4455	1.14	0.312	11	6.7	1.37	221.328	FALSE	FALSE	TRUE	15.9092
119.783	31.3667	江苏省	无锡	15.7	1277.1	0	3	13.9327	1.28	0.312	11	6.5	1.32	221.328	FALSE	FALSE	TRUE	5.35876
119.783	31.3667	江苏省	无锡	15.7	1277.1	0	3	16.1253	1.56	0.312	11	6.8	1.28	221.328	FALSE	FALSE	TRUE	5.52989
119.783	31.3667	江苏省	无锡	15.7	1277.1	0	3	13.4455	1.14	0.312	11	6.7	1.37	221.328	FALSE	FALSE	TRUE	6.30929
120.471	31.4468	江苏省	无锡	16.6	1312	220	3	17.6	1.73	0.325	10	5.65	1.34	229	FALSE	TRUE	FALSE	9.9
120.471	31.4468	江苏省	无锡	16.6	1312	242	3	17.6044	1.73	0.325	10	5.65	1.34	228.816	FALSE	TRUE	FALSE	11.963
120.084	31.4919	江苏省	常州	16.2	1121.7	180	3	8.97	1.39	0.598	11	5.7	1.41	173.67	FALSE	FALSE	TRUE	0.38
120.084	31.4919	江苏省	常州	16.2	1121.7	180	3	8.97	1.39	0.598	11	5.7	1.41	173.67	FALSE	FALSE	TRUE	0.39
120.084	31.4919	江苏省	常州	16.2	1121.7	225	3	8.97	1.39	0.598	11	5.7	1.41	173.67	FALSE	TRUE	FALSE	1.25
120.084	31.4919	江苏省	常州	16.2	1121.7	225	3	8.97	1.39	0.598	11	5.7	1.41	173.67	FALSE	TRUE	FALSE	2.11
120.084	31.4919	江苏省	常州	16.2	1121.7	0	3	8.97	1.39	0.598	11	5.7	1.41	173.67	FALSE	FALSE	TRUE	0.09
120.084	31.4919	江苏省	常州	16.2	1121.7	0	3	8.97	1.39	0.598	11	5.7	1.41	173.67	FALSE	FALSE	TRUE	0.13
120.084	31.4919	江苏省	常州	16.2	1121.7	0	3	8.97	1.39	0.598	11	5.7	1.41	173.67	FALSE	TRUE	FALSE	0.73
120.084	31.4919	江苏省	常州	16.2	1121.7	0	3	8.97	1.39	0.598	11	5.7	1.41	173.67	FALSE	TRUE	FALSE	1.06
120.01	31.52	江苏省	常州	15.7	1177	153	3	18.56	1.88	0.376	11	6.99	1.41	200	FALSE	FALSE	TRUE	0.41
120.01	31.52	江苏省	常州	15.7	1177	153	3	18.56	1.88	0.376	11	6.99	1.41	200	FALSE	FALSE	TRUE	2.03
120.01	31.52	江苏省	常州	15.7	1177	180	3	18.56	1.88	0.376	11	6.99	1.41	200	FALSE	TRUE	FALSE	1.9
120.01	31.52	江苏省	常州	15.7	1177	180	3	18.56	1.88	0.376	11	6.99	1.41	200	FALSE	TRUE	FALSE	2.61
120.01	31.52	江苏省	常州	15.7	1177	240	3	18.5615	1.88	0.376	11	6.99	1.41009	200.415	FALSE	TRUE	FALSE	3.74
120.01	31.52	江苏省	常州	15.7	1177	240	3	18.5615	1.88	0.376	11	6.99	1.41009	200.415	FALSE	TRUE	FALSE	4.18
120.01	31.52	江苏省	常州	15.7	1177	270	3	18.5615	1.88	0.376	11	6.99	1.41009	200.415	FALSE	FALSE	TRUE	0.51
120.01	31.52	江苏省	常州	15.7	1177	270	3	18.5615	1.88	0.376	11	6.99	1.41009	200.415	FALSE	FALSE	TRUE	3.27
120.01	31.52	江苏省	常州	15.7	1177	0	3	18.5615	1.88	0.376	11	6.99	1.41009	200.415	FALSE	FALSE	TRUE	0.38
120.01	31.52	江苏省	常州	15.7	1177	0	3	18.5615	1.88	0.376	11	6.99	1.41009	200.415	FALSE	TRUE	FALSE	1.3
120.01	31.52	江苏省	常州	15.7	1177	0	3	18.5615	1.88	0.376	11	6.99	1.41009	200.415	FALSE	FALSE	TRUE	1.39
120.01	31.52	江苏省	常州	15.7	1177	0	3	18.5615	1.88	0.376	11	6.99	1.41009	200.415	FALSE	TRUE	FALSE	2.36
120.699	31.5458	江苏省	苏州	17.8	1038	530	3	10.5	1.1	0.299	10	4.7	1.27	341.105	FALSE	TRUE	FALSE	4.4
120.699	31.5458	江苏省	苏州	16.9	1200	266	3	17.8654	1.79	0.385	10	7.4	1.23	341.105	FALSE	TRUE	FALSE	13.34
120.699	31.5458	江苏省	苏州	16.9	1200	266	3	17.8654	1.79	0.385	10	7.4	1.23	341.105	FALSE	TRUE	FALSE	16.26
120.699	31.5458	江苏省	苏州	16.9	1200	266	3	17.8654	1.79	0.385	10	7.4	1.23	341.105	FALSE	TRUE	FALSE	17.39
120.699	31.5458	江苏省	苏州	16.9	1200	0	3	17.8654	1.79	0.385	10	7.4	1.23	341.105	FALSE	TRUE	FALSE	1.02
120.699	31.5458	江苏省	苏州	16.9	1200	0	3	17.8654	1.79	0.385	10	7.4	1.23	341.105	FALSE	TRUE	FALSE	3.24
120.699	31.5458	江苏省	苏州	16.9	1200	0	3	17.8654	1.79	0.385	10	7.4	1.23	341.105	FALSE	TRUE	FALSE	3.96
120.699	31.5458	江苏省	苏州	15.5	1038.4	250	3	16.1253	1.81	0.372379	15	6.05	1.26662	341.105	FALSE	FALSE	TRUE	9.88
120.699	31.5458	江苏省	苏州	15.5	1038.4	300	3	16.1253	1.81	0.372379	15	6.05	1.26662	341.105	FALSE	TRUE	FALSE	1.87
120.699	31.5458	江苏省	苏州	15.5	1038.4	0	3	16.1253	1.81	0.372379	15	6.05	1.26662	341.105	FALSE	TRUE	FALSE	1.04
120.699	31.5458	江苏省	苏州	15.5	1038.4	0	3	16.1253	1.81	0.372379	15	6.05	1.26662	341.105	FALSE	FALSE	TRUE	1.49
120.703	31.5476	江苏省	苏州	25.5	683	240	3	14.8492	1.45	0.343	10	5.8	1.27064	345.989	FALSE	TRUE	FALSE	4.66
120.703	31.5476	江苏省	苏州	25.5	683	240	3	14.8492	1.45	0.343	10	5.8	1.27064	345.989	FALSE	TRUE	FALSE	10.18
120.703	31.5476	江苏省	苏州	25.5	683	240	3	14.8492	1.45	0.343	10	5.8	1.27064	345.989	FALSE	TRUE	FALSE	11.97
120.703	31.5476	江苏省	苏州	25.5	683	0	3	14.8492	1.45	0.343	10	5.8	1.27064	345.989	FALSE	TRUE	FALSE	4.42
120.703	31.5476	江苏省	苏州	25.5	683	0	3	14.8492	1.45	0.343	10	5.8	1.27064	345.989	FALSE	TRUE	FALSE	4.88
120.703	31.5476	江苏省	苏州	25.5	683	0	3	14.8492	1.45	0.343	10	5.8	1.27064	345.989	FALSE	TRUE	FALSE	7.75
120.633	31.55	江苏省	苏州	16.9	938.2	440	3	17.8654	1.79	0.385	10	7.4	1.26029	367.354	FALSE	TRUE	FALSE	7.39
120.7	31.55	江苏省	苏州	15.5	1038	225	4	20.3	2.09	0.343	17.7	7.36	1.27	346	FALSE	FALSE	TRUE	1.38
120.7	31.55	江苏省	苏州	15.5	1038	225	4	20.3016	2.09	0.331	10	7.36	1.27	345.99	FALSE	TRUE	FALSE	3.2
120.7	31.55	江苏省	苏州	15.5	1038	225	4	20.3016	2.09	0.331	10	7.36	1.27	345.99	FALSE	TRUE	FALSE	4.8
120.7	31.55	江苏省	苏州	15.5	1038	225	4	20.3	2.09	0.343	17.7	7.36	1.27	346	FALSE	TRUE	FALSE	7.92
120.7	31.55	江苏省	苏州	15.5	1038	225	3	16.1253	1.81	0.452857	15	5.5	1.27064	345.989	FALSE	FALSE	TRUE	12.82
120.7	31.55	江苏省	苏州	15.5	1038	225	3	20.3016	2.09	0.2082	10	7.36	1.48	345.989	FALSE	FALSE	TRUE	14.52
120.7	31.55	江苏省	苏州	15.5	1038	270	3	20.3016	2.09	0.2082	10	7.36	1.48	345.989	FALSE	TRUE	FALSE	2.06
120.7	31.55	江苏省	苏州	15.5	1038	270	3	20.3016	2.1	0.452857	10	7.4	1.27064	345.989	FALSE	TRUE	FALSE	4.2
120.7	31.55	江苏省	苏州	15.5	1038	300	4	20.3016	2.09	0.343	17.7	7.36	1.27064	345.989	FALSE	FALSE	TRUE	1.76
120.7	31.55	江苏省	苏州	15.5	1038	300	4	20.3016	2.09	0.331	10	7.36	1.27	345.989	FALSE	TRUE	FALSE	4.8
120.7	31.55	江苏省	苏州	15.5	1038	300	4	20.3016	2.09	0.331	10	7.36	1.27	345.989	FALSE	TRUE	FALSE	5.2
120.7	31.55	江苏省	苏州	15.5	1038	300	4	20.3016	2.09	0.343	17.7	7.36	1.27064	345.989	FALSE	TRUE	FALSE	7.97
120.7	31.55	江苏省	苏州	15.5	1038	0	4	20.3016	2.09	0.343	17.7	7.36	1.27064	345.989	FALSE	FALSE	TRUE	0.68
120.7	31.55	江苏省	苏州	15.5	1038	0	3	16.1253	1.81	0.452857	15	5.5	1.27064	345.989	FALSE	FALSE	TRUE	1.04
120.7	31.55	江苏省	苏州	15.5	1038	0	3	20.3016	2.09	0.2082	10	7.36	1.48	345.989	FALSE	TRUE	FALSE	1.22
120.7	31.55	江苏省	苏州	15.5	1038	0	3	20.3016	2.1	0.452857	10	7.4	1.27064	345.989	FALSE	TRUE	FALSE	2.5
120.7	31.55	江苏省	苏州	15.5	1038	0	3	20.3016	2.09	0.2082	10	7.36	1.48	345.989	FALSE	FALSE	TRUE	3.1
120.7	31.55	江苏省	苏州	15.5	1038	0	4	20.3016	2.09	0.343	17.7	7.36	1.27064	345.989	FALSE	TRUE	FALSE	7.79
120.708	31.559	江苏省	苏州	15.5	1038	300	3	20.3016	2.09	0.28834	17.7	7.35	1.26242	347.079	FALSE	TRUE	FALSE	11.02
120.708	31.559	江苏省	苏州	15.5	1038	0	3	20.3016	2.09	0.28834	17.7	7.35	1.26242	347.079	FALSE	TRUE	FALSE	4.74
120.708	31.5592	江苏省	苏州	15.5	1038	300	3	20.3016	2.09	0.28834	17.7	7.35	1.26242	347.079	FALSE	TRUE	FALSE	9.75
120.708	31.5592	江苏省	苏州	15.5	1038	0	3	20.3016	2.09	0.28834	17.7	7.35	1.26242	347.079	FALSE	TRUE	FALSE	4.8
120.708	31.5592	江苏省	苏州	15.5	1038	0	3	20.3016	2.09	0.28834	17.7	7.35	1.26242	347.079	FALSE	TRUE	FALSE	5.17
120.352	31.6832	江苏省	无锡	15	1086	150	3	20	1.79	0.343	11	7.36	1.26	297.815	FALSE	TRUE	FALSE	2.65
120.352	31.6832	江苏省	无锡	15	1086	0	3	20	1.79	0.343	11	7.36	1.26	297.815	FALSE	TRUE	FALSE	2.88
120.7	31.7	江苏省	苏州	15.7	1177	300	3	28.4	1.4	0.2082	1	6.4	1.4	338.756	FALSE	FALSE	TRUE	49.37
120.7	31.7	江苏省	苏州	15.7	1177	0	3	28.4	1.4	0.2082	1	6.4	1.4	338.756	FALSE	FALSE	TRUE	17.8
120.8	31.7	江苏省	苏州	15.7	1177	300	3	28.4	1.3	0.2082	10	6.4	1.52	257.438	FALSE	TRUE	FALSE	0.483
120.8	31.7	江苏省	苏州	15.7	1177	300	3	28.4	1.3	0.2082	10	6.4	1.52	257.438	FALSE	FALSE	TRUE	5.807
120.8	31.7	江苏省	苏州	15.7	1177	0	3	28.4	1.3	0.2082	10	6.4	1.52	257.438	FALSE	TRUE	FALSE	0.229
120.8	31.7	江苏省	苏州	15.7	1177	0	3	28.4	1.3	0.2082	10	6.4	1.52	257.438	FALSE	FALSE	TRUE	0.361
118.983	31.95	江苏省	南京	15	1100	150	3	21.09	1.65	0.27	27	7.94	1.18	199.06	FALSE	FALSE	TRUE	81.72
118.983	31.95	江苏省	南京	15	1100	190	3	21.09	1.65	0.27	27	7.94	1.18	199.06	FALSE	TRUE	FALSE	0.72
118.983	31.95	江苏省	南京	15	1076	200	3	12.23	1.65	0.27	27	7.94	1.18	199	FALSE	FALSE	TRUE	1.41
118.983	31.95	江苏省	南京	15	1100	200	3	21.09	1.65	0.27	27	7.94	1.18	199.06	FALSE	FALSE	TRUE	131.32
118.983	31.95	江苏省	南京	15	1076	230	3	12.23	1.65	0.27	27	7.94	1.18	199	FALSE	TRUE	FALSE	0.05
118.983	31.95	江苏省	南京	15	1100	230	3	21.09	1.65	0.27	27	7.94	1.18	199.06	FALSE	TRUE	FALSE	0.83
118.983	31.95	江苏省	南京	15	1076	230	3	12.2332	1.65	0.27	27	7.94	1.18	199.06	FALSE	FALSE	TRUE	1.42
118.983	31.95	江苏省	南京	15	1100	230	3	21.09	1.65	0.27	27	7.94	1.18	199.06	FALSE	FALSE	TRUE	114.47
118.983	31.95	江苏省	南京	15	1076	270	3	12.2332	1.65	0.27	27	7.94	1.18	199.06	FALSE	TRUE	FALSE	0.057
118.983	31.95	江苏省	南京	15	1100	270	3	21.09	1.65	0.27	27	7.94	1.18	199.06	FALSE	TRUE	FALSE	1.18
118.983	31.95	江苏省	南京	15	1076	0	3	12.2332	1.65	0.27	27	7.94	1.18	199.06	FALSE	TRUE	FALSE	0.037
118.983	31.95	江苏省	南京	15	1076	0	3	12.2332	1.65	0.27	27	7.94	1.18	199.06	FALSE	FALSE	TRUE	0.31
119.296	31.968	江苏省	镇江	15.5	1099.1	240	3	6.90255	0.85	0.0400905	1	5.21	1.4	193.341	FALSE	TRUE	FALSE	9.48
119.296	31.968	江苏省	镇江	15.5	1099.1	0	3	6.90255	0.85	0.0400905	1	5.21	1.4	193.341	FALSE	TRUE	FALSE	3.97
119.6	32	江苏省	镇江	15.4	1072.8	220	3	5.2	1.3	0.21	10	6.65	1.42	250.23	FALSE	FALSE	TRUE	28.4
119.2	32.1	江苏省	镇江	15	1200	200	3	18.36	2.11	0.1	6	6.1	1.23	160.505	FALSE	FALSE	TRUE	29.15
119.2	32.1	江苏省	镇江	15	1200	270	3	18.36	2.11	0.1	6	6.1	1.23	160.505	FALSE	TRUE	FALSE	13.14
119.2	32.1	江苏省	镇江	15	1200	0	3	18.36	2.11	0.1	6	6.1	1.23	160.505	FALSE	TRUE	FALSE	2.49
119.2	32.1	江苏省	镇江	15	1200	0	3	18.36	2.11	0.1	6	6.1	1.36784	160.505	FALSE	FALSE	TRUE	8.55
118.623	32.4844	江苏省	南京	14	1054	0	3	6.96056	1.19	0.266	11	5.85	1.4	190.191	FALSE	FALSE	TRUE	3.93
120.4	32.5833	江苏省	南通	14.5	1025	270	3	14.6752	1.39	0.219	11	6.53	1.41	238.544	FALSE	TRUE	FALSE	7.8
120.4	32.5833	江苏省	南通	14.5	1025	270	3	14.6752	1.39	0.219	11	6.53	1.41	238.544	FALSE	TRUE	FALSE	7.9
116.926	28.2053	江西省	鹰潭	17.6	1700	150	3	12.3666	1.13	0.24	6	4.59	1.65	121.557	FALSE	TRUE	FALSE	11.1
116.926	28.2053	江西省	鹰潭	17.6	1700	150	3	12.3666	1.13	0.24	6	4.59	1.65	121.557	FALSE	TRUE	FALSE	12.6
116.926	28.2053	江西省	鹰潭	17.6	1700	150	3	12.3666	1.13	0.24	6	4.59	1.65	121.557	FALSE	TRUE	FALSE	13.7
116.926	28.2053	江西省	鹰潭	17.6	1700	150	3	12.3666	1.13	0.24	6	4.59	1.65	121.557	FALSE	TRUE	FALSE	18.2
116.926	28.2053	江西省	鹰潭	17.6	1700	0	3	12.3666	1.13	0.24	6	4.59	1.65	121.557	FALSE	TRUE	FALSE	2.3
116.926	28.2053	江西省	鹰潭	17.6	1700	0	3	12.3666	1.13	0.24	6	4.59	1.65	121.557	FALSE	TRUE	FALSE	3.8
116.926	28.2053	江西省	鹰潭	17.6	1700	0	3	12.3666	1.13	0.24	6	4.59	1.65	121.557	FALSE	TRUE	FALSE	4.1
116.926	28.2053	江西省	鹰潭	17.6	1700	0	3	12.3666	1.13	0.24	6	4.59	1.65	121.557	FALSE	TRUE	FALSE	5.6
114.317	28.3166	江西省	宜春	12	1711	240	3	8.46868	1	0.23	12	5.8	1.31271	31.9037	TRUE	FALSE	FALSE	69.19
114.317	28.3166	江西省	宜春	12	1711	240	3	8.46868	1	0.23	12	5.8	1.31271	31.9037	TRUE	FALSE	FALSE	71.08
114.317	28.3166	江西省	宜春	12	1711	240	3	8.46868	1	0.23	12	5.8	1.31271	31.9037	TRUE	FALSE	FALSE	79.78
114.563	38.0354	河北省	石家庄	13	496	250	3	9.9768	0.82	0.1696	16	7.6	1.41	208.22	FALSE	FALSE	TRUE	7.86626
114.563	38.0354	河北省	石家庄	13	496	0	3	9.9768	0.82	0.1696	16	7.6	1.41	208.22	FALSE	FALSE	TRUE	3.50425
117.63	39.7581	河北省	唐山	11.3	693	225	4	14.04	0.95	0.442	24	8.01	1.3	116.93	TRUE	FALSE	FALSE	6.39
117.63	39.7581	河北省	唐山	11.3	693	225	4	14.04	0.95	0.442	24	8.01	1.3	116.93	FALSE	FALSE	TRUE	46.63
117.63	39.7581	河北省	唐山	11.3	693	0	4	14.04	0.95	0.442	24	8.01	1.3	116.93	TRUE	FALSE	FALSE	1.44
117.63	39.7581	河北省	唐山	11.3	693	0	4	14.04	0.95	0.442	24	8.01	1.3	116.93	FALSE	FALSE	TRUE	13.82
119.5	39.95	河北省	秦皇岛	10	653	120	3	15.5	1.43	0.17	16	7.9	1.53	172	FALSE	FALSE	TRUE	7
119.5	39.95	河北省	秦皇岛	10	653	120	3	15.5	1.43	0.17	16	7.9	1.53	172	TRUE	FALSE	FALSE	21
119.5	39.95	河北省	秦皇岛	10	653	120	3	15.5	1.43	0.17	16	7.9	1.53	172	FALSE	FALSE	TRUE	22
119.5	39.95	河北省	秦皇岛	10	653	120	3	15.5	1.43	0.17	16	7.9	1.53	172	TRUE	FALSE	FALSE	70
119.5	39.95	河北省	秦皇岛	10	653	240	3	15.5	1.43	0.17	16	7.9	1.52707	172	TRUE	FALSE	FALSE	38
119.5	39.95	河北省	秦皇岛	10	653	240	3	15.5	1.43	0.17	16	7.9	1.52707	172	FALSE	FALSE	TRUE	62
119.5	39.95	河北省	秦皇岛	10	653	240	3	15.5	1.43	0.17	16	7.9	1.52707	172	TRUE	FALSE	FALSE	104
119.5	39.95	河北省	秦皇岛	10	653	240	3	15.5	1.43	0.17	16	7.9	1.52707	172	FALSE	FALSE	TRUE	117
114.4	35	河南省	新乡	13.9	615	226.6	3	14.23	0.88	0.096	6	8.3	1.55	280.086	TRUE	FALSE	FALSE	11
114.4	35	河南省	新乡	13.9	615	229.9	3	14.23	0.88	0.096	6	8.3	1.55	280.086	TRUE	FALSE	FALSE	30.1
114.4	35	河南省	新乡	13.9	615	248.7	3	14.23	0.88	0.096	6	8.3	1.55	280.086	FALSE	FALSE	TRUE	17.6
114.4	35	河南省	新乡	13.9	615	283.2	3	14.23	0.88	0.096	6	8.3	1.55	280.086	FALSE	FALSE	TRUE	51.7
113.684	35.0371	河南省	新乡	14	600	240	3	6.32	0.63	0.06	6	8.85	1.4	274	TRUE	FALSE	FALSE	21.3
113.684	35.0371	河南省	新乡	14	600	240	3	6.32	0.63	0.06	6	8.85	1.4	274	TRUE	FALSE	FALSE	36.7
113.809	35.2409	河南省	新乡	13	581	180	3	9.57077	1.02	0.18	14	7.5	1.3	180.61	FALSE	FALSE	TRUE	42.48
114.298	35.6738	河南省	鹤壁	13	574	220	3	17.08	1.72	0.1807	14	7.99	1.39	239	FALSE	FALSE	TRUE	17.1
114.298	35.6738	河南省	鹤壁	13	574	280	3	17.0766	1.72	0.180696	14	7.99	1.38961	239.213	FALSE	FALSE	TRUE	37.26
114.298	35.6738	河南省	鹤壁	13	574	0	3	17.0766	1.72	0.180696	14	7.99	1.38961	239.213	FALSE	FALSE	TRUE	5.04
119.133	30.0833	浙江省	杭州	16	1250	200	3	13.2	1.45	0.366	12	5.4	1.31	196	FALSE	TRUE	FALSE	3.71
119.133	30.0833	浙江省	杭州	16	1250	200	3	13.2	1.45	0.366	12	5.4	1.31	196	FALSE	TRUE	FALSE	4.17
119.133	30.0833	浙江省	杭州	16	1250	200	3	13.2	1.45	0.366	12	5.4	1.31	196	FALSE	TRUE	FALSE	4.46
119.133	30.0833	浙江省	杭州	16	1250	200	3	13.2	1.45	0.366	12	5.4	1.31	196	FALSE	TRUE	FALSE	4.62
119.133	30.0833	浙江省	杭州	16	1250	200	3	13.2	1.45	0.366	12	5.4	1.31	196	FALSE	TRUE	FALSE	4.82
119.133	30.0833	浙江省	杭州	16	1250	200	3	13.2	1.45	0.366	12	5.4	1.31	196	FALSE	TRUE	FALSE	5.26
120.082	30.1578	浙江省	杭州	16	1436	450	3	20.5916	2.85	0.164	11	7.8	1.41	145.825	FALSE	TRUE	FALSE	39.15
119.926	30.2281	浙江省	杭州	15.8	1628	241	3	13.8631	1.36	0.184	8.58	5.89	1.31	115.358	FALSE	TRUE	FALSE	40.39
119.926	30.2281	浙江省	杭州	15.8	1628	0	3	13.8631	1.36	0.184	8.58	5.89	1.31	115.358	FALSE	TRUE	FALSE	12.02
119.888	30.3639	浙江省	杭州	15.6	1350	240	3	21.75	3.46	0.149	11	5.78	1.41	133.39	FALSE	TRUE	FALSE	15.34
119.888	30.3639	浙江省	杭州	15.6	1350	240	3	21.75	3.46	0.149	11	5.78	1.41	133.39	FALSE	TRUE	FALSE	17.06
119.888	30.3639	浙江省	杭州	15.6	1350	0	3	21.75	3.46	0.149	11	5.78	1.41	133.39	FALSE	TRUE	FALSE	4.15
119.888	30.3639	浙江省	杭州	15.6	1350	0	3	21.75	3.46	0.149	11	5.78	1.41	133.39	FALSE	TRUE	FALSE	4.48
120.412	30.44	浙江省	嘉兴	15.9	1187	210	3	7.83063	1.13	0.21	11	7.41	1.41	223.017	FALSE	TRUE	FALSE	3.99
120.412	30.44	浙江省	嘉兴	15.9	1187	0	3	7.83063	1.13	0.21	11	7.41	1.41	223.017	FALSE	TRUE	FALSE	1.97
120.283	30.4667	浙江省	杭州	15	1366	270	3	8.41067	1.17	0.0375773	1	6.22	1.40053	205.501	FALSE	TRUE	FALSE	0.56
120.283	30.4667	浙江省	杭州	15	1366	0	3	8.41067	1.17	0.0375773	1	6.22	1.40053	205.501	FALSE	TRUE	FALSE	0.49
120.3	30.5	浙江省	杭州	15.5	1300	180	3	11.4269	2.3	0.37	5.4	7.2	1.04	213.834	FALSE	TRUE	FALSE	11.5
120.3	30.5	浙江省	杭州	15.5	1300	0	3	11.4269	2.3	0.37	5.4	7.2	1.04	213.834	FALSE	TRUE	FALSE	3.3
120.667	30.8333	浙江省	嘉兴	15.5	1100	180	3	20.3016	2.7	0.517	8.1	6.8	1.33	325.514	FALSE	TRUE	FALSE	9.3
120.667	30.8333	浙江省	嘉兴	15.5	1100	0	3	20.3016	2.7	0.517	8.1	6.8	1.33	325.514	FALSE	TRUE	FALSE	2.4
120.718	30.8384	浙江省	嘉兴	15	1246	180	3	11.1369	1.68	0.388984	23	6	1.2802	337.321	FALSE	FALSE	TRUE	12.1
120.718	30.8384	浙江省	嘉兴	15	1246	0	3	11.1369	1.68	0.388984	23	6	1.2802	337.321	FALSE	FALSE	TRUE	4.6
115.5	29.9167	湖北省	黄冈	16.8	1360.6	210	3	15.6613	2.48	0.3	11	5.85	1.29	129	FALSE	TRUE	FALSE	8.05
115.5	29.9167	湖北省	黄冈	16.8	1360.6	210	3	15.6613	2.48	0.3	11	5.85	1.29	129	FALSE	TRUE	FALSE	9.18
115.5	29.9167	湖北省	黄冈	16.8	1360.6	0	3	15.6613	2.48	0.3	11	5.85	1.29	129	FALSE	TRUE	FALSE	1.89
115.5	29.9167	湖北省	黄冈	16.8	1360.6	0	3	15.6613	2.48	0.3	11	5.85	1.29	129	FALSE	TRUE	FALSE	2.41
112.15	30.35	湖北省	荆州	16.5	1095	150	3	10.17	2.04	0.21	16	7.4	1.39	137	FALSE	TRUE	FALSE	14.33
112.15	30.35	湖北省	荆州	16.5	1095	180	3	10.1692	2.04	0.21	16	7.4	1.39018	136.594	FALSE	TRUE	FALSE	19.53
112.08	30.36	湖北省	荆州	16.2	1200	165	3	9.23	1.27	0.658	16	7.62	1.38	142	FALSE	TRUE	FALSE	10.63
112.08	30.36	湖北省	荆州	16.2	1200	165	3	9.23	1.27	0.658	16	7.62	1.38	142	FALSE	TRUE	FALSE	10.64
112.08	30.36	湖北省	荆州	16.2	1200	210	3	9.22854	1.27	0.658	16	7.62	1.38182	142.397	FALSE	TRUE	FALSE	12.72
112.08	30.36	湖北省	荆州	16.2	1200	0	3	9.22854	1.27	0.658	16	7.62	1.38182	142.397	FALSE	TRUE	FALSE	8.04
114.051	30.5978	湖北省	武汉	16	1300	147	3	12.007	0.86	0.2	14	6.3	1.34	126.25	FALSE	TRUE	FALSE	25.89
114.051	30.5978	湖北省	武汉	16	1300	157.5	3	12.007	0.86	0.2	14	6.3	1.34	126.25	FALSE	FALSE	TRUE	45.97
112.17	30.82	湖北省	荆门	16	999	180	4	8.99072	1.2	0.658	11	6.8	1.25	141.386	FALSE	TRUE	FALSE	20.23
112.17	30.82	湖北省	荆门	16	999	180	4	8.99072	1.2	0.658	11	6.8	1.25	141.386	FALSE	TRUE	FALSE	27.18
112.17	30.82	湖北省	荆门	16	999	0	4	8.99072	1.2	0.658	11	6.8	1.25	141.386	FALSE	TRUE	FALSE	7.23
112.17	30.82	湖北省	荆门	16	999	0	4	8.99072	1.2	0.658	11	6.8	1.25	141.386	FALSE	TRUE	FALSE	14.46
110.863	32.4905	湖北省	十堰	15.2	834	180	3	9.86	0.84404	0.12	6	6.6	1.6	63	FALSE	FALSE	TRUE	1.12
110.863	32.4905	湖北省	十堰	15.2	834	180	3	9.86	0.84404	0.12	6	6.6	1.6	63	FALSE	FALSE	TRUE	2.54
110.863	32.4905	湖北省	十堰	15.2	834	180	3	9.86	0.84404	0.12	6	6.6	1.6	63	FALSE	FALSE	TRUE	4.14
111.876	26.7533	湖南省	永州	18	1250	300	3	7.89	1.07	0.281	10	4.8	1.19	80.3035	TRUE	FALSE	FALSE	42.9
111.877	26.7572	湖南省	永州	17	1266	300	4	14.3271	1.28	0.281	10	5.6	1.25	80.3035	FALSE	TRUE	FALSE	1.4
111.877	26.7572	湖南省	永州	17	1266	300	4	14.3271	1.28	0.281	10	5.6	1.25	80.3035	FALSE	TRUE	FALSE	3.4
111.877	26.7572	湖南省	永州	17	1266	300	4	14.3271	1.28	0.281	10	5.6	1.25	80.3035	FALSE	TRUE	FALSE	4.1
111.877	26.7572	湖南省	永州	17	1266	0	4	14.3271	1.28	0.281	10	5.6	1.25	80.3035	FALSE	TRUE	FALSE	0.2
111.877	26.7572	湖南省	永州	17	1266	0	4	14.3271	1.28	0.281	10	5.6	1.25	80.3035	FALSE	TRUE	FALSE	0.2
111.877	26.7572	湖南省	永州	17	1266	0	4	14.3271	1.28	0.281	10	5.6	1.25	80.3035	FALSE	TRUE	FALSE	0.4
111.877	26.7572	湖南省	永州	17	1266	0	4	14.3271	1.28	0.281	10	5.6	1.25	80.3035	FALSE	TRUE	FALSE	2.5
113.36	28.12	湖南省	长沙	17.2	1300	200	3	29.6172	4.29	0.198	10	5.72	1.25	81.1757	FALSE	TRUE	FALSE	25.51
113.198	28.1398	湖南省	长沙	22.5	1577	90	3	19.7796	1.86	0.25	11	6.5	1.37097	111.367	FALSE	TRUE	FALSE	13.526
113.198	28.1398	湖南省	长沙	22.5	1577	0	3	19.7796	1.86	0.25	11	6.5	1.37097	111.367	FALSE	TRUE	FALSE	4.30812
113.085	28.194	湖南省	长沙	16.8	1400	150	3	25.6381	3.02	0.776	14.54	7.67	1.41	133.458	FALSE	TRUE	FALSE	1.97
113.085	28.194	湖南省	长沙	16.8	1400	150	3	16.1833	1.99	0.322	12.38	4.77	1.41	133.458	FALSE	TRUE	FALSE	4.5
113.085	28.194	湖南省	长沙	16.8	1400	150	3	13.8051	1.87	0.364	9.96	4.92	1.41	133.458	FALSE	TRUE	FALSE	6.83
113.817	28.3167	湖南省	长沙	17.5	1551.3	120	3	11.46	1.28	0.4937	10	6.72	1.24	48	FALSE	TRUE	FALSE	14.26
113.817	28.3167	湖南省	长沙	17.5	1551.3	120	3	11.46	1.28	0.4937	10	6.72	1.24	48	FALSE	TRUE	FALSE	14.33
113.817	28.3167	湖南省	长沙	17.5	1551.3	135	3	11.46	1.28	0.4937	10	6.72	1.24	48	FALSE	TRUE	FALSE	14.93
113.817	28.3167	湖南省	长沙	17.5	1551.3	135	3	11.46	1.28	0.4937	10	6.72	1.24	48	FALSE	TRUE	FALSE	16.82
113.817	28.3167	湖南省	长沙	17.5	1551.3	180	3	11.4559	1.28	0.493658	10	6.72	1.24191	48.2435	FALSE	TRUE	FALSE	20.1
113.817	28.3167	湖南省	长沙	17.5	1551.3	180	3	11.4559	1.28	0.493658	10	6.72	1.24191	48.2435	FALSE	TRUE	FALSE	22.89
113.817	28.3167	湖南省	长沙	17.5	1551.3	0	3	11.4559	1.28	0.493658	10	6.72	1.24191	48.2435	FALSE	TRUE	FALSE	2.13
113.817	28.3167	湖南省	长沙	17.5	1551.3	0	3	11.4559	1.28	0.493658	10	6.72	1.24191	48.2435	FALSE	TRUE	FALSE	2.86
113.817	28.3167	湖南省	长沙	17.5	1551.3	0	3	11.4559	1.28	0.493658	10	6.72	1.24191	48.2435	FALSE	TRUE	FALSE	2.97
113.817	28.3167	湖南省	长沙	17.5	1551.3	0	3	11.4559	1.28	0.493658	10	6.72	1.24191	48.2435	FALSE	TRUE	FALSE	2.97
113.817	28.3167	湖南省	长沙	17.5	1551.3	150	3	11.4559	1.28	0.493658	10	6.72	1.24191	48.2435	FALSE	TRUE	FALSE	17.55
113.817	28.3167	湖南省	长沙	17.5	1551.3	150	3	11.4559	1.28	0.493658	10	6.72	1.24191	48.2435	FALSE	TRUE	FALSE	18.08
113.82	28.32	湖南省	长沙	17.5	1551.3	150	3	9.64037	1.21	0.238	11	5.61	1.40061	48.2435	FALSE	TRUE	FALSE	26.2
113.82	28.32	湖南省	长沙	17.5	1551.3	180	3	9.64037	1.21	0.238	11	5.61	1.40061	48.2435	FALSE	TRUE	FALSE	27.8
113.82	28.32	湖南省	长沙	17.3	1552.3	240	3	8.45128	1.02	0.238	11	5.75	1.40061	48.2435	TRUE	FALSE	FALSE	69.92
113.82	28.32	湖南省	长沙	17.5	1551.3	0	3	9.64037	1.21	0.238	11	5.61	1.40061	48.2435	FALSE	TRUE	FALSE	4.3
113.82	28.32	湖南省	长沙	17.5	1551.3	0	3	9.64037	1.21	0.238	11	5.61	1.40061	48.2435	FALSE	TRUE	FALSE	5.9
113.82	28.32	湖南省	长沙	17.3	1552.3	0	3	8.45128	1.02	0.238	11	5.75	1.40061	48.2435	TRUE	FALSE	FALSE	12.83
113.821	28.3282	湖南省	长沙	16	1571	150	3	8.10325	3.21	0.211278	11	5.7	1.40924	48.8312	FALSE	TRUE	FALSE	21.76
113.821	28.3282	湖南省	长沙	16	1571	180	3	8.10325	3.21	0.211278	11	5.7	1.40924	48.8312	FALSE	TRUE	FALSE	27.04
113.821	28.3282	湖南省	长沙	16	1571	0	3	8.10325	3.21	0.211278	11	5.7	1.40924	48.8312	FALSE	TRUE	FALSE	5.48
113.821	28.3282	湖南省	长沙	16	1571	0	3	8.10325	3.21	0.211278	11	5.7	1.40924	48.8312	FALSE	TRUE	FALSE	6.48
112.501	28.5156	湖南省	益阳	16.5	1465	150	3	20.7831	2.05	0.4175	11	5.16	1.41	209.808	FALSE	TRUE	FALSE	6.11
112.501	28.5156	湖南省	益阳	16.5	1465	180	3	20.7831	2.05	0.4175	11	5.16	1.41	209.808	FALSE	TRUE	FALSE	7.78
112.501	28.5156	湖南省	益阳	16.5	1465	0	3	20.7831	2.05	0.4175	11	5.16	1.41	209.808	FALSE	TRUE	FALSE	2.34
112.501	28.5156	湖南省	益阳	16.5	1465	0	3	20.7831	2.05	0.4175	11	5.16	1.41	209.808	FALSE	TRUE	FALSE	2.71
113.32	28.55	湖南省	长沙	18	1640.5	180	3	14.85	1.36	0.346	10	6.5	1.25	95.3995	FALSE	TRUE	FALSE	3.55
113.331	28.55	湖南省	长沙	17.2	1300	180	3	11.0789	0.84	0.1	11	6.1	1.35381	92.4126	FALSE	TRUE	FALSE	3.55
112.737	28.9531	湖南省	益阳	17	1400	172.5	3	7.59	0.781	0.515	11	7.1	1.38	218	FALSE	TRUE	FALSE	38.58
112.737	28.9531	湖南省	益阳	17	1400	0	3	7.59	0.781	0.515	11	7.1	1.38	218	FALSE	TRUE	FALSE	7.85
112.983	29.2909	湖南省	岳阳	16.8	1400	150	3	25.6381	3.02	0.7764	14.54	7.67	1.22	62.2101	FALSE	TRUE	FALSE	1.97
112.983	29.2909	湖南省	岳阳	16.8	1400	150	3	16.1833	1.99	0.4222	12.38	4.77	1.22	62.2101	FALSE	TRUE	FALSE	4.5
112.983	29.2909	湖南省	岳阳	16.8	1400	150	3	13.8051	1.87	0.3642	9.96	4.92	1.22	62.2101	FALSE	TRUE	FALSE	6.83
112.983	29.2909	湖南省	岳阳	16.8	1400	0	3	25.6381	3.02	0.7764	14.54	7.67	1.22	62.2101	FALSE	TRUE	FALSE	1.88
112.983	29.2909	湖南省	岳阳	16.8	1400	0	3	16.1833	1.99	0.4222	12.38	4.77	1.22	62.2101	FALSE	TRUE	FALSE	4.13
112.983	29.2909	湖南省	岳阳	16.8	1400	0	3	13.8051	1.87	0.3642	9.96	4.92	1.22	62.2101	FALSE	TRUE	FALSE	5.76
107.667	35.2	甘肃省	平凉	9.2	9.2	160	3	6.5	0.8	0.24	9	8.4	1.41	76	TRUE	FALSE	FALSE	65.58
107.667	35.2	甘肃省	平凉	9.2	9.2	160	3	6.5	0.8	0.24	9	8.4	1.41	76	TRUE	FALSE	FALSE	80.1
107.667	35.2	甘肃省	平凉	10	584	200	3	6.5	0.8	0.24	9	8.4	1.41	140	TRUE	FALSE	FALSE	73.64
107.667	35.2	甘肃省	平凉	9.1	580	225	3	9.2	1.5	0.201	9	8	1.2	113	TRUE	FALSE	FALSE	14.23
107.667	35.2	甘肃省	平凉	9.1	580	225	3	9.2	1.5	0.201	9	8	1.2	113	TRUE	FALSE	FALSE	40.41
107.667	35.2	甘肃省	平凉	9.1	580	225	3	9.2	1.5	0.201	9	8	1.2	113	TRUE	FALSE	FALSE	45.83
107.667	35.2	甘肃省	平凉	9.1	580	225	3	9.2	1.5	0.201	9	8	1.2	113	TRUE	FALSE	FALSE	84.86
107.667	35.2	甘肃省	平凉	10	584	250	3	6.5	0.8	0.24	9	8.4	1.41	140	TRUE	FALSE	FALSE	206.55
107.667	35.2	甘肃省	平凉	10	584	0	3	6.5	0.8	0.24	9	8.4	1.41	140	TRUE	FALSE	FALSE	10.23
107.667	35.2	甘肃省	平凉	9.2	560	0	3	6.5	0.8	0.24	9	8.4	1.3	118	TRUE	FALSE	FALSE	14.69
107.67	35.2	甘肃省	平凉	9.1	578.5	139	3	6.09049	1.02	0.228	9	8.3	1.38	133	FALSE	FALSE	TRUE	73.5
107.67	35.2	甘肃省	平凉	9.1	578.5	0	3	6.09049	1.02	0.228	9	8.3	1.38	133	FALSE	FALSE	TRUE	6
107.493	35.495	甘肃省	庆阳	10	552	225	3	8.23666	1.07	0.2	16	8.69	1.31	125	TRUE	FALSE	FALSE	41.955
107.493	35.495	甘肃省	庆阳	10	552	225	3	8.23666	1.07	0.2	16	8.69	1.31	125	TRUE	FALSE	FALSE	42.4
107.493	35.495	甘肃省	庆阳	10	552	0	3	8.23666	1.07	0.2	16	8.69	1.31	125	TRUE	FALSE	FALSE	3.296
107.493	35.495	甘肃省	庆阳	10	552	0	3	8.23666	1.07	0.2	16	8.69	1.31	125	TRUE	FALSE	FALSE	3.74
102.833	37.8667	甘肃省	武威	7.8	164	200	3	6.61	0.88	0.22	11	8.1	1.45	209	TRUE	FALSE	FALSE	31
102.833	37.8667	甘肃省	武威	7.8	164	280	3	6.61	0.877154	0.22	11	8.1	1.45	208.599	TRUE	FALSE	FALSE	58
102.667	38.6167	甘肃省	武威	7.7	150	300	3	9.51276	1.28	0.25	37	8.8	1.58	220	TRUE	FALSE	FALSE	10.0582
102.667	38.6167	甘肃省	武威	7.7	150	0	3	9.51276	1.28	0.25	37	8.8	1.58	220	TRUE	FALSE	FALSE	8.09527
100.433	38.9333	甘肃省	张掖	7	130	300	3	7.25	0.87	0.064	10	8.2	1.36	258	TRUE	FALSE	FALSE	8.14
100.433	38.9333	甘肃省	张掖	7	130	400	3	7.25058	0.87	0.064	10	8.2	1.36	258	TRUE	FALSE	FALSE	12.27
100.433	38.9333	甘肃省	张掖	7	130	0	3	7.25058	0.87	0.064	10	8.2	1.36	258	TRUE	FALSE	FALSE	2.38
107.1	26.87	贵州省	贵阳	13.5	1129.9	120	3	23.0452	1.64	0.54	14	7.42	1.21	41	TRUE	FALSE	FALSE	8.768
107.1	26.87	贵州省	贵阳	13.5	1129.9	0	3	23.0452	1.64	0.54	14	7.42	1.21	41	TRUE	FALSE	FALSE	5.219
106.933	27.5333	贵州省	遵义	18	1135	120	4	11.9374	1.06	0.464	10.5	6.42	1.36936	33.6386	TRUE	FALSE	FALSE	34.24
106.933	27.5333	贵州省	遵义	18	1135	0	4	11.9374	1.06	0.464	10.5	6.42	1.36936	33.6386	TRUE	FALSE	FALSE	3.28
106.942	27.5339	贵州省	遵义	15.5	1100	221	3	10.3886	0.78	0.503	11	7.8	1.41	33.5767	TRUE	FALSE	FALSE	29.88
106.942	27.5339	贵州省	遵义	15.5	1100	221	3	10.3886	0.78	0.503	11	7.8	1.41	33.5767	TRUE	FALSE	FALSE	31.11
106.942	27.5339	贵州省	遵义	15.5	1100	221	3	10.3886	0.78	0.503	11	7.8	1.41	33.5767	TRUE	FALSE	FALSE	31.13
106.942	27.5339	贵州省	遵义	15.5	1100	221	3	10.3886	0.78	0.503	11	7.8	1.41	33.5767	TRUE	FALSE	FALSE	33.23
106.942	27.5339	贵州省	遵义	15.5	1100	221	3	10.3886	0.78	0.503	11	7.8	1.41	33.5767	TRUE	FALSE	FALSE	33.78
121.348	41.1451	辽宁省	锦州	8.7	446.9	210	3	13.17	1.41	0.193	16	7.1	1.55	39	TRUE	FALSE	FALSE	16.08
121.348	41.1451	辽宁省	锦州	8.7	446.9	263	3	13.1671	1.41	0.193	16	7.1	1.54989	39.3493	TRUE	FALSE	FALSE	14.625
121.348	41.1451	辽宁省	锦州	8.7	446.9	0	3	13.1671	1.41	0.193	16	7.1	1.54989	39.3493	TRUE	FALSE	FALSE	7.775
119.657	41.1542	辽宁省	朝阳	9	475	168	3	9.44896	0.659	0.178329	14	6.65	1.38889	23	TRUE	FALSE	FALSE	50.3262
119.657	41.1542	辽宁省	朝阳	9	475	0	3	9.44896	0.659	0.178329	14	6.65	1.38889	23	TRUE	FALSE	FALSE	39.8444
122.093	41.6839	辽宁省	锦州	8	576	180	3	8.82	1.15	0.2143	13	5.72	1.48	18	TRUE	FALSE	FALSE	1.05
122.093	41.6839	辽宁省	锦州	8	576	180	3	8.82	1.15	0.2143	13	5.72	1.48	18	TRUE	FALSE	FALSE	7.39
122.093	41.6839	辽宁省	锦州	8	576	240	3	8.81671	1.15	0.21429	13	5.72	1.48	17.8448	TRUE	FALSE	FALSE	1.36
122.093	41.6839	辽宁省	锦州	8	576	240	3	8.81671	1.15	0.21429	13	5.72	1.48	17.8448	TRUE	FALSE	FALSE	8.69
123.564	41.8185	辽宁省	沈阳	7.5	710	160	3	10.9165	1.04	0.234	20	7.6	1.2	100	TRUE	FALSE	FALSE	60.49
123.564	41.8185	辽宁省	沈阳	7.5	710	0	3	10.9165	1.04	0.234	20	7.6	1.2	100	TRUE	FALSE	FALSE	4.54
106.409	29.81	重庆市	北碚	17	1164	150	3	7.65661	1.79453	0.5031	23.72	7.2	1.39769	49.098	FALSE	FALSE	TRUE	4.27
106.409	29.81	重庆市	北碚	17	1164	150	3	6.96056	1.79453	0.3696	9.83	5.2	1.39769	49.098	FALSE	FALSE	TRUE	4.99
106.409	29.81	重庆市	北碚	17	1164	0	3	7.65661	1.79453	0.5031	23.72	7.2	1.39769	49.098	FALSE	FALSE	TRUE	1.55
106.409	29.81	重庆市	北碚	17	1164	0	3	7.07657	1.79453	0.546	19.18	7.7	1.39769	49.098	FALSE	FALSE	TRUE	1.62
106.409	29.81	重庆市	北碚	17	1164	0	3	6.96056	1.79453	0.3696	9.83	5.2	1.39769	49.098	FALSE	FALSE	TRUE	1.92
106.272	30.007	重庆市	合川	18.4	1105.5	225	3	10.4756	1.13	0.5031	12	6.42	1.3	57.2203	TRUE	FALSE	FALSE	82.38
106.272	30.007	重庆市	合川	18.4	1105.5	0	3	10.4756	1.13	0.5031	12	6.42	1.3	57.2203	TRUE	FALSE	FALSE	6.8
106.272	30.007	重庆市	合川	18.4	1105.5	180	3	10.48	1.13	0.5031	12	6.42	1.3	57	TRUE	FALSE	FALSE	44.7
106.43	30.26	重庆市	合川	18.2	1114.8	225	3	7.65661	1.16	0.503	23.72	7.2	1.3	58.8866	FALSE	FALSE	TRUE	4.12
106.43	30.26	重庆市	合川	18.2	1114.8	225	3	6.96056	1.04	0.37	9.83	5.2	1.34	58.8866	FALSE	TRUE	FALSE	14.77
106.43	30.26	重庆市	合川	18.2	1114.8	225	3	7.07657	0.99	0.546	19.18	7.7	1.45	58.8866	FALSE	TRUE	FALSE	15.13
106.43	30.26	重庆市	合川	18.2	1114.8	225	3	7.65661	1.16	0.503	23.72	7.2	1.3	58.8866	FALSE	TRUE	FALSE	16.27
106.43	30.26	重庆市	合川	18.2	1114.8	0	3	7.65661	1.16	0.503	23.72	7.2	1.3	58.8866	FALSE	FALSE	TRUE	1.87
106.43	30.26	重庆市	合川	18.2	1114.8	0	3	6.96056	1.04	0.37	9.83	5.2	1.34	58.8866	FALSE	TRUE	FALSE	11.5
106.43	30.26	重庆市	合川	18.2	1114.8	0	3	7.07657	0.99	0.546	19.18	7.7	1.45	58.8866	FALSE	TRUE	FALSE	12.6
106.43	30.26	重庆市	合川	18.2	1114.8	0	3	7.65661	1.16	0.503	23.72	7.2	1.3	58.8866	FALSE	TRUE	FALSE	13.19
108.167	30.3667	重庆市	石柱	19.2	1150	229	3	4.39	0.35	0.2096	12	8.33	1.41	61	TRUE	FALSE	FALSE	29.59
108.167	30.3667	重庆市	石柱	19.2	1150	450	3	4.38515	0.35	0.2096	12	8.33	1.4056	61	TRUE	FALSE	FALSE	30.84
108.167	30.3667	重庆市	石柱	19.2	1209	270	3	4.07773	0.51	0.41	12	8.27	1.3	75	TRUE	FALSE	FALSE	25.6221
108.167	30.3667	重庆市	石柱	19.2	1209	270	3	4.07773	0.51	0.41	12	8.27	1.3	75	TRUE	FALSE	FALSE	29.5886
108.167	30.3667	重庆市	石柱	19.2	1150	270	3	4.07773	0.51	0.41	12	8.27	1.3	75	TRUE	FALSE	FALSE	33.94
108.167	30.3667	重庆市	石柱	19.2	1209	270	3	4.07773	0.51	0.41	12	8.27	1.3	75	TRUE	FALSE	FALSE	44.56
108.167	30.3667	重庆市	石柱	19.2	1150	300	3	4.07773	0.51	0.41	12	8.27	1.3	75	TRUE	FALSE	FALSE	14.25
108.167	30.3667	重庆市	石柱	19.2	1209	300	3	4.07773	0.51	0.41	12	8.27	1.3	75	TRUE	FALSE	FALSE	18.9243
108.167	30.3667	重庆市	石柱	19.2	1209	300	3	4.07773	0.51	0.41	12	8.27	1.3	75	TRUE	FALSE	FALSE	19.74
108.167	30.3667	重庆市	石柱	19.2	1209	300	3	4.07773	0.51	0.41	12	8.27	1.3	75	TRUE	FALSE	FALSE	30.8424
108.167	30.3667	重庆市	石柱	19.2	1150	0	3	4.07773	0.51	0.41	12	8.27	1.3	75	TRUE	FALSE	FALSE	3.49
108.167	30.3667	重庆市	石柱	19.2	1209	0	3	4.07773	0.51	0.41	12	8.27	1.3	75	TRUE	FALSE	FALSE	15.763
108.167	30.4167	重庆市	忠县	19.2	1150	270	3	7.56	0.35	0.162	12	8.33	1.34	25	TRUE	FALSE	FALSE	70.28
108.167	30.4167	重庆市	忠县	19.2	1150	450	3	7.56	0.35	0.162	12	8.33	1.34	24.8649	TRUE	FALSE	FALSE	45.99
108.167	30.4167	重庆市	忠县	19.2	1150	0	3	7.56	0.35	0.162	12	8.33	1.34	24.8649	TRUE	FALSE	FALSE	18.16
108.03	34.06	陕西省	西安	13	600	0	3	9.91879	0.85	0.17	16	7.38	1.2	169	FALSE	FALSE	TRUE	0.39
108.03	34.06	陕西省	西安	13	600	0	3	9.91879	0.85	0.17	16	7.38	1.2	169	FALSE	FALSE	TRUE	0.91
108.03	34.06	陕西省	西安	13	600	0	3	9.91879	0.85	0.17	16	7.38	1.2	169	TRUE	FALSE	FALSE	1.69
108.03	34.06	陕西省	西安	13	600	0	3	9.91879	0.85	0.17	16	7.38	1.2	169	TRUE	FALSE	FALSE	2.21
108.033	34.0667	陕西省	西安	13	575	330	3	9.89559	0.85	0.132	16	7.38	1.41	88.1812	TRUE	FALSE	FALSE	10.67
108.033	34.0667	陕西省	西安	13	575	0	3	9.89559	0.85	0.132	16	7.38	1.41	88.1812	TRUE	FALSE	FALSE	2.69
108.03	34.07	陕西省	西安	13	575	180	3	9.9	0.85	0.3028	16	7.38	1.2	92	TRUE	FALSE	FALSE	9.84
108.03	34.07	陕西省	西安	13	575	180	3	9.9	0.85	0.3028	16	7.38	1.2	92	TRUE	FALSE	FALSE	11.4
108.03	34.07	陕西省	西安	13	575	180	3	9.9	0.85	0.3028	16	7.38	1.2	92	TRUE	FALSE	FALSE	17.28
108.03	34.07	陕西省	西安	13	575	330	3	9.89559	0.85	0.17	16	7.38	1.2	188	FALSE	FALSE	TRUE	3.55
108.03	34.07	陕西省	西安	13	575	330	3	9.89559	0.85	0.17	16	7.38	1.2	188	FALSE	FALSE	TRUE	9.84
108.03	34.07	陕西省	西安	13	575	330	3	9.89559	0.85	0.17	16	7.38	1.2	188	FALSE	FALSE	TRUE	11.4
108.03	34.07	陕西省	西安	13	575	330	3	9.89559	0.85	0.17	16	7.38	1.2	188	FALSE	FALSE	TRUE	14.1
108.03	34.07	陕西省	西安	13	575	330	3	9.89559	0.85	0.17	16	7.38	1.2	188	FALSE	FALSE	TRUE	15.42
108.03	34.07	陕西省	西安	13	575	330	3	9.89559	0.85	0.17	16	7.38	1.2	188	FALSE	FALSE	TRUE	17.28
108.03	34.07	陕西省	西安	13	575	471	3	9.89559	0.85	0.17	16	7.38	1.2	188	FALSE	FALSE	TRUE	10.51
108.03	34.07	陕西省	西安	13	575	471	3	9.89559	0.85	0.17	16	7.38	1.2	188	FALSE	FALSE	TRUE	14.64
108.03	34.07	陕西省	西安	13	575	471	3	9.89559	0.85	0.17	16	7.38	1.2	188	FALSE	FALSE	TRUE	18.56
108.03	34.07	陕西省	西安	13	575	471	3	9.89559	0.85	0.17	16	7.38	1.2	188	FALSE	FALSE	TRUE	18.65
108.03	34.07	陕西省	西安	13	575	471	3	9.89559	0.85	0.17	16	7.38	1.2	188	FALSE	FALSE	TRUE	20.26
108.03	34.07	陕西省	西安	13	575	471	3	9.89559	0.85	0.17	16	7.38	1.2	188	FALSE	FALSE	TRUE	25.36
108.03	34.07	陕西省	西安	13	575	495	3	9.89559	0.85	0.3028	16	7.38	1.2	92.2679	TRUE	FALSE	FALSE	10.87
108.03	34.07	陕西省	西安	13	575	495	3	9.89559	0.85	0.3028	16	7.38	1.2	92.2679	TRUE	FALSE	FALSE	17.93
108.03	34.07	陕西省	西安	13	575	495	3	9.89559	0.85	0.3028	16	7.38	1.2	92.2679	TRUE	FALSE	FALSE	29.75
108.03	34.07	陕西省	西安	13	575	0	3	9.89559	0.85	0.17	16	7.38	1.2	188	FALSE	FALSE	TRUE	1.52
108.03	34.07	陕西省	西安	13	575	0	3	9.89559	0.85	0.17	16	7.38	1.2	188	FALSE	FALSE	TRUE	2.31
108.03	34.07	陕西省	西安	13	575	0	3	9.89559	0.85	0.17	16	7.38	1.2	188	FALSE	FALSE	TRUE	2.38
108.03	34.07	陕西省	西安	13	575	0	3	9.89559	0.85	0.17	16	7.38	1.2	188	FALSE	FALSE	TRUE	2.82
108.03	34.07	陕西省	西安	13	575	0	3	9.89559	0.85	0.17	16	7.38	1.2	188	FALSE	FALSE	TRUE	3.2
108.03	34.07	陕西省	西安	13	575	0	3	9.89559	0.85	0.17	16	7.38	1.2	188	FALSE	FALSE	TRUE	4.56
108.957	34.2256	陕西省	西安	23.8	23.8	114	5	8.82	0.4	0.21	11	7.9	1.41	183	FALSE	FALSE	TRUE	7.34
108.957	34.2256	陕西省	西安	23.8	23.8	124	5	8.82	0.4	0.21	11	7.9	1.41	183	FALSE	FALSE	TRUE	8.05
108.957	34.2256	陕西省	西安	9	9	157	5	9.11	0.4	0.21	11	7.9	1.41	183	TRUE	FALSE	FALSE	19.5
108.957	34.2256	陕西省	西安	9	9	186	5	9.11	0.4	0.21	11	7.9	1.41	183	TRUE	FALSE	FALSE	25.7
108.957	34.2256	陕西省	西安	23.8	23.8	218	5	8.81671	0.4	0.21	11	7.9	1.41	182.938	FALSE	FALSE	TRUE	18.5
108.957	34.2256	陕西省	西安	9	9	296	5	9.10673	0.4	0.21	11	7.9	1.41	182.938	TRUE	FALSE	FALSE	72.1
108	34.2833	陕西省	咸阳	13	575	150	4	10.94	0.61	0.1746	11	8.44	1.41	160	FALSE	FALSE	TRUE	5
108	34.2833	陕西省	咸阳	13	575	150	4	10.94	0.61	0.1746	11	8.44	1.41	160	FALSE	FALSE	TRUE	12.19
108	34.2833	陕西省	咸阳	13	575	180	4	10.94	0.61	0.1746	11	8.44	1.41	160	TRUE	FALSE	FALSE	1.96
108	34.2833	陕西省	咸阳	13	575	180	4	10.94	0.61	0.1746	11	8.44	1.41	160	TRUE	FALSE	FALSE	6.62
108	34.2833	陕西省	咸阳	13	575	210	4	10.9376	0.612	0.174644	11	8.44	1.41	160.412	FALSE	FALSE	TRUE	8.4
108	34.2833	陕西省	咸阳	13	575	210	4	10.9376	0.612	0.174644	11	8.44	1.41	160.412	FALSE	FALSE	TRUE	11.13
108	34.2833	陕西省	咸阳	13	575	280	4	11.3321	0.612	0.174644	11	8.44	1.41	160.412	TRUE	FALSE	FALSE	7.38
108	34.2833	陕西省	咸阳	13	575	280	4	11.3321	0.612	0.174644	11	8.44	1.41	160.412	TRUE	FALSE	FALSE	17.35
108.069	34.2939	陕西省	咸阳	13	632	180	3	10.5568	0.95	0.221	11	8.12	1.4	159.756	TRUE	FALSE	FALSE	135.05
108.069	34.2939	陕西省	咸阳	13	632	0	3	10.5568	0.95	0.221	11	8.12	1.4	159.756	TRUE	FALSE	FALSE	40.72
108.013	34.2975	陕西省	咸阳	13	575	135	3	6.33411	0.832	0.168	12	8.62	1.41	162.937	FALSE	FALSE	TRUE	21.708
108.013	34.2975	陕西省	咸阳	12.9	550	150	3	11.4906	0.61	0.32	12	8.44	1.41	162.937	FALSE	FALSE	TRUE	50.1
108.013	34.2975	陕西省	咸阳	12.9	550	180	3	11.4906	0.61	0.32	12	8.44	1.41	162.937	TRUE	FALSE	FALSE	60.33
108.013	34.2975	陕西省	咸阳	13	575	150	3	9.9	0.65	0.3028	12	7.45	1.2	163	TRUE	FALSE	FALSE	11.87
108.013	34.2975	陕西省	咸阳	13	575	180	3	9.9	0.65	0.3028	12	7.45	1.2	163	FALSE	FALSE	TRUE	0.36
108.013	34.2975	陕西省	咸阳	13	575	191	3	9.89559	0.65	0.3028	12	7.45	1.2	162.937	TRUE	FALSE	FALSE	19.85
108.013	34.2975	陕西省	咸阳	13	575	280	3	9.89559	0.65	0.3028	12	7.45	1.2	162.937	FALSE	FALSE	TRUE	0.14
108.013	34.2975	陕西省	咸阳	13	575	0	3	9.89559	0.65	0.3028	12	7.45	1.2	162.937	FALSE	FALSE	TRUE	0.11
108.013	34.2975	陕西省	咸阳	13	575	0	3	9.89559	0.65	0.3028	12	7.45	1.2	162.937	TRUE	FALSE	FALSE	5.76
108.08	34.3	陕西省	咸阳	12.9	550	150	4	8.05	0.83	0.3028	11	8.14	1.41	162	FALSE	FALSE	TRUE	32.9
108.08	34.3	陕西省	咸阳	12.9	550	225	4	8.05104	0.83	0.3028	11	8.14	1.41	161.614	FALSE	FALSE	TRUE	63.8
108.08	34.3	陕西省	咸阳	12.9	550	0	4	8.05104	0.83	0.3028	11	8.14	1.41	161.614	FALSE	FALSE	TRUE	2.06
108.083	34.3	陕西省	咸阳	12.9	581	160	4	8	1.07	0.2153	11	8.25	1.41	162	FALSE	FALSE	TRUE	76.1
108.083	34.3	陕西省	咸阳	12.9	581	240	4	8.00464	1.07	0.215282	11	8.25	1.41	161.614	FALSE	FALSE	TRUE	68.8
108.083	34.3	陕西省	咸阳	12.9	581	0	4	8.00464	1.07	0.215282	11	8.25	1.41	161.614	FALSE	FALSE	TRUE	25.9
108.104	34.3113	陕西省	咸阳	13	563.1	144	3	7.71462	0.9	0.258	12	8	1.3	163	FALSE	FALSE	TRUE	78.71
108.104	34.3113	陕西省	咸阳	13	563.1	144	3	7.71462	0.9	0.258	12	8	1.3	163	FALSE	FALSE	TRUE	95.52
108.104	34.3113	陕西省	咸阳	13	563.1	144	3	7.71462	0.9	0.258	12	8	1.3	163	FALSE	FALSE	TRUE	102.99
108.104	34.3113	陕西省	咸阳	13	563.1	144	3	7.71462	0.9	0.258	12	8	1.3	163	FALSE	FALSE	TRUE	107.9
108.104	34.3113	陕西省	咸阳	13	563.1	144	3	7.71462	0.9	0.258	12	8	1.3	163	FALSE	FALSE	TRUE	121.65
108.104	34.3113	陕西省	咸阳	13	563.1	144	3	7.71462	0.9	0.258	12	8	1.3	163	FALSE	FALSE	TRUE	177.77
108.104	34.3113	陕西省	咸阳	13	563.1	0	3	7.71462	0.9	0.258	12	8	1.3	162.967	FALSE	FALSE	TRUE	15.64
108.104	34.3113	陕西省	咸阳	13	563.1	0	3	7.71462	0.9	0.258	12	8	1.3	162.967	FALSE	FALSE	TRUE	20.11
108.104	34.3113	陕西省	咸阳	13	563.1	0	3	7.71462	0.9	0.258	12	8	1.3	162.967	FALSE	FALSE	TRUE	32.47
108.104	34.3113	陕西省	咸阳	13	563.1	0	3	7.71462	0.9	0.258	12	8	1.3	162.967	FALSE	FALSE	TRUE	38.49
108.104	34.3113	陕西省	咸阳	13	563.1	0	3	7.71462	0.9	0.258	12	8	1.3	162.967	FALSE	FALSE	TRUE	38.97
108.104	34.3113	陕西省	咸阳	13	563.1	0	3	7.71462	0.9	0.258	12	8	1.3	162.967	FALSE	FALSE	TRUE	44.12
108.167	34.35	陕西省	咸阳	12	637	226.5	2	12.65	1.24	0.255	12	7.89	1.41	171.39	FALSE	FALSE	TRUE	23.58
108.167	34.35	陕西省	咸阳	12	637	226.5	2	12.65	1.24	0.255	12	7.89	1.41	171.39	FALSE	FALSE	TRUE	24.28
108.167	34.35	陕西省	咸阳	12	637	226.5	2	12.65	1.24	0.255	12	7.89	1.41	171.39	FALSE	FALSE	TRUE	33.52
108.717	34.5833	陕西省	咸阳	12	535	240	3	11.2	0.405006	0.245	11	7.8	1.3	181.912	TRUE	FALSE	FALSE	24.6
108.717	34.5833	陕西省	咸阳	12	535	240	3	11.2	0.405006	0.245	11	7.8	1.3	181.912	FALSE	FALSE	TRUE	122.9
108.717	34.5833	陕西省	咸阳	12	535	0	3	11.2	0.405006	0.245	11	7.8	1.3	181.912	TRUE	FALSE	FALSE	14.2
108.717	34.5833	陕西省	咸阳	12	535	0	3	11.2	0.405006	0.245	11	7.8	1.3	181.912	FALSE	FALSE	TRUE	61.5
127.933	45.3667	黑龙江省	哈尔滨	5	480	187.5	4	16.7633	0.3	0.387	13	6.39	1.40234	66	TRUE	FALSE	FALSE	25.46
127.933	45.3667	黑龙江省	哈尔滨	5	480	0	4	16.7633	0.3	0.387	13	6.39	1.40234	66	TRUE	FALSE	FALSE	0.88
125.921	48.2281	黑龙江省	齐齐哈尔	1	510	135	3	34.28	2.68	0.23	20	6.4	1.15	38	FALSE	TRUE	FALSE	13.77
125.921	48.2281	黑龙江省	齐齐哈尔	1	510	150	3	34.28	2.68	0.23	20	6.4	1.15	38	FALSE	TRUE	FALSE	13.97

## Sheet: RTN
Longitude	Latitude	Province	Prefecture	Tem	Pre	rate	n	SOC	TN	Clay	CEC	pH	BD	irrigation	Maize	Rice	Wheat	RTN
110.775	21.35	Unknown	Unknown	22	1632	106.5	3	10.0093	1.00502	0.23	6	5.5887	1.40149	123	FALSE	TRUE	FALSE	4.88
110.775	21.35	Unknown	Unknown	22	1632	114	3	10.0093	1.00502	0.23	6	5.5887	1.40149	123	FALSE	TRUE	FALSE	9.84
110.775	21.35	Unknown	Unknown	22	1632	0	3	10.0093	1.00502	0.23	6	5.5887	1.40149	123	FALSE	TRUE	FALSE	3.77
110.775	21.35	Unknown	Unknown	22	1632	0	3	10.0093	1.00502	0.23	6	5.5887	1.40149	123	FALSE	TRUE	FALSE	8.92
121.45	30.6666	Unknown	Unknown	15.7	1350	225	3	11.2	2.83	0.21	11	5.49	1.41	247	FALSE	TRUE	FALSE	18.09
121.45	30.6666	Unknown	Unknown	15.6	1510	270	2	14.55	2.49	0.21	11	5.4	1.41	247	FALSE	TRUE	FALSE	2.68
121.45	30.6666	Unknown	Unknown	15.6	1510	337.5	2	14.55	2.49	0.21	11	5.4	1.41	247	FALSE	TRUE	FALSE	2.5124
121.245	30.8487	上海市	金山	16	1100	316	3	16.7	1.003	0.183	11	7.36	1.41	351.857	FALSE	TRUE	FALSE	2.13
121.75	30.87	上海市	奉贤	26.4	456	375	3	7.5406	1.47	0.2025	11	7.9	1.39	170	FALSE	TRUE	FALSE	4.09
121.75	30.87	上海市	奉贤	26.4	456	0	3	7.5406	1.47	0.2025	11	7.9	1.39	170	FALSE	TRUE	FALSE	3.57
121.385	30.889	上海市	奉贤	15.8	1178	200	3	13.75	1.44	0.21	17.5	7.63	1.41	328	FALSE	TRUE	FALSE	3.33
121.385	30.889	上海市	奉贤	15.8	1178	200	3	13.75	1.44	0.21	17.5	7.63	1.41	328	FALSE	TRUE	FALSE	4.74
121.385	30.889	上海市	奉贤	15.8	1178	300	3	13.7471	1.44	0.21	17.5	7.63	1.41	327.791	FALSE	TRUE	FALSE	8.27
121.385	30.889	上海市	奉贤	15.8	1178	300	3	13.7471	1.44	0.21	17.5	7.63	1.41	327.791	FALSE	TRUE	FALSE	10.7
121.385	30.889	上海市	奉贤	15.8	1178	0	3	13.7471	1.44	0.21	17.5	7.63	1.41	327.791	FALSE	TRUE	FALSE	0.83
121.385	30.889	上海市	奉贤	15.8	1178	0	3	13.7471	1.44	0.21	17.5	7.63	1.41	327.791	FALSE	TRUE	FALSE	2.08
121.385	30.8892	上海市	奉贤	15	1212	150	3	13.75	1.44	0.21	17.5	7.63	1.41	328	FALSE	FALSE	TRUE	2.6
121.385	30.8892	上海市	奉贤	15	1212	150	3	13.75	1.44	0.21	17.5	7.63	1.41	328	FALSE	FALSE	TRUE	3.02
121.385	30.8892	上海市	奉贤	15	1212	150	3	13.75	1.44	0.21	17.5	7.63	1.41	328	FALSE	FALSE	TRUE	8.54
121.385	30.8892	上海市	奉贤	15	1212	200	3	13.75	1.44	0.21	17.5	7.63	1.41	328	FALSE	TRUE	FALSE	2.22
121.385	30.8892	上海市	奉贤	15	1212	200	3	13.75	1.44	0.21	17.5	7.63	1.41	328	FALSE	TRUE	FALSE	4.12
121.385	30.8892	上海市	奉贤	15	1212	200	3	13.75	1.44	0.21	17.5	7.63	1.41	328	FALSE	TRUE	FALSE	6.12
121.385	30.8892	上海市	奉贤	15	1212	225	3	13.7471	1.44	0.21	17.5	7.63	1.41	327.791	FALSE	FALSE	TRUE	4
121.385	30.8892	上海市	奉贤	15	1212	225	3	13.7471	1.44	0.21	17.5	7.63	1.41	327.791	FALSE	FALSE	TRUE	4.85
121.385	30.8892	上海市	奉贤	15	1212	225	3	13.7471	1.44	0.21	17.5	7.63	1.41	327.791	FALSE	FALSE	TRUE	17.11
121.385	30.8892	上海市	奉贤	15	1212	300	3	13.7471	1.44	0.21	17.5	7.63	1.41	327.791	FALSE	TRUE	FALSE	2.76
121.385	30.8892	上海市	奉贤	15	1212	300	3	13.7471	1.44	0.21	17.5	7.63	1.41	327.791	FALSE	TRUE	FALSE	10.71
121.385	30.8892	上海市	奉贤	15	1212	0	3	13.7471	1.44	0.21	17.5	7.63	1.41	327.791	FALSE	FALSE	TRUE	0.54
121.385	30.8892	上海市	奉贤	15	1212	0	3	13.7471	1.44	0.21	17.5	7.63	1.41	327.791	FALSE	TRUE	FALSE	0.805
121.385	30.8892	上海市	奉贤	15	1212	0	3	13.7471	1.44	0.21	17.5	7.63	1.41	327.791	FALSE	FALSE	TRUE	1.31
121.385	30.8892	上海市	奉贤	15	1212	0	3	13.7471	1.44	0.21	17.5	7.63	1.41	327.791	FALSE	FALSE	TRUE	1.53
121.385	30.8892	上海市	奉贤	15	1212	0	3	13.7471	1.44	0.21	17.5	7.63	1.41	327.791	FALSE	TRUE	FALSE	1.88
121.385	30.8892	上海市	奉贤	15	1212	0	3	13.7471	1.44	0.21	17.5	7.63	1.41	327.791	FALSE	TRUE	FALSE	2.06
121.388	30.89	上海市	奉贤	16.1	1191.5	300	3	17.8	2.6	0.21	11	6.34	1.41	327.791	FALSE	TRUE	FALSE	1.22
121.388	30.89	上海市	奉贤	16.1	1191.5	0	3	18.7	2.8	0.21	11	6.31	1.41	327.791	FALSE	TRUE	FALSE	0.51
121.388	30.89	上海市	奉贤	16.1	1191.5	0	3	18.7	2.8	0.21	11	6.31	1.41	327.791	FALSE	TRUE	FALSE	3.92
121.388	30.89	上海市	奉贤	16.1	1191.5	300	3	13.7	1.4	0.21	11	7.6	1.4	327.791	FALSE	TRUE	FALSE	13.83
121.388	30.89	上海市	奉贤	16.1	1191.5	0	3	13.7	1.4	0.21	11	7.6	1.4	327.791	FALSE	TRUE	FALSE	2.06
121.033	30.9689	上海市	青浦	15.6	1178.2	300	3	16.6589	1.2	0.44	10	4.38215	1.25565	322.178	FALSE	TRUE	FALSE	20.01
121.033	30.9689	上海市	青浦	15.6	1178.2	0	3	16.6589	1.2	0.44	10	4.38215	1.25565	322.178	FALSE	TRUE	FALSE	10.59
121.017	31.0167	上海市	青浦	17.6	1269.3	300	3	13.5731	1.26	0.183	10	7.2	1.27	271.669	FALSE	TRUE	FALSE	24.79
121.017	31.0167	上海市	青浦	17.6	1269.3	300	3	13.5731	1.26	0.183	10	7.2	1.27	271.669	FALSE	TRUE	FALSE	27.01
121.017	31.0167	上海市	青浦	17.6	1269.3	0	3	13.5731	1.26	0.183	10	7.2	1.27	271.669	FALSE	TRUE	FALSE	8.07
121.017	31.0167	上海市	青浦	17.6	1269.3	0	3	13.5731	1.26	0.183	10	7.2	1.27	271.669	FALSE	TRUE	FALSE	8.52
121.118	31.1474	上海市	青浦	15	1150	382.5	3	12.0049	2.67366	0.44	10	6.48669	1.35069	331.497	FALSE	TRUE	FALSE	12.77
121.118	31.1474	上海市	青浦	15	1150	0	3	12.0049	2.67366	0.44	10	6.48669	1.35069	331.497	FALSE	TRUE	FALSE	3.27
121.122	31.1612	上海市	青浦	15	1149	300	3	11.2	1.52	0.216	11	7.8	1.41	344.595	FALSE	TRUE	FALSE	4.52
121.133	31.2	上海市	青浦	16.7	1087.3	300	3	14.8144	1.15	0.44	10	7.18	1.29	334.889	FALSE	TRUE	FALSE	13.74
121.133	31.2	上海市	青浦	16.7	1087.3	300	3	14.8144	1.15	0.44	10	7.18	1.29	334.889	FALSE	TRUE	FALSE	14.73
121.133	31.2	上海市	青浦	16.7	1087.3	0	3	14.8144	1.15	0.44	10	7.18	1.29	334.889	FALSE	TRUE	FALSE	1.79
121.133	31.2	上海市	青浦	16.7	1087.3	0	3	14.8144	1.15	0.44	10	7.18	1.29	334.889	FALSE	TRUE	FALSE	3.05
121.133	31.2	上海市	青浦	15.6	1178.2	300	3	11.1485	1.49	0.245	10	7.57	1.3	334.889	FALSE	TRUE	FALSE	1.61
121.133	31.2	上海市	青浦	16.7	1000	300	3	13.5209	1.2	0.245	10	7.02	1.37	334.889	FALSE	TRUE	FALSE	3.43
121.133	31.2	上海市	青浦	15.6	1178.2	300	3	11.1485	1.49	0.245	10	7.57	1.3	334.889	FALSE	TRUE	FALSE	12.77
121.133	31.2	上海市	青浦	16.7	1000	300	3	13.5209	1.2	0.245	10	7.02	1.37	334.889	FALSE	TRUE	FALSE	21.52
121.133	31.2	上海市	青浦	15.6	1178.2	0	3	11.1485	1.49	0.245	10	7.57	1.3	334.889	FALSE	TRUE	FALSE	0.56
121.133	31.2	上海市	青浦	16.7	1000	0	3	13.5209	1.2	0.245	10	7.02	1.37	334.889	FALSE	TRUE	FALSE	2.65
121.133	31.2	上海市	青浦	16.7	1000	0	3	13.5209	1.2	0.245	10	7.02	1.37	334.889	FALSE	TRUE	FALSE	3.18
121.133	31.2	上海市	青浦	15.6	1178.2	0	3	11.1485	1.49	0.245	10	7.57	1.3	334.889	FALSE	TRUE	FALSE	3.27
121.307	31.3273	上海市	嘉定	15	1126	213.5	3	15.9977	1.38	0.252	11	7	1.41	154.035	FALSE	FALSE	TRUE	5.39
121.307	31.3273	上海市	嘉定	15	1126	229	3	15.9977	1.38	0.252	11	7	1.41	154.035	FALSE	FALSE	TRUE	11.71
121.307	31.3273	上海市	嘉定	15	1126	250	3	15.9977	1.38	0.252	11	7	1.41	154.035	FALSE	TRUE	FALSE	10.08
121.307	31.3273	上海市	嘉定	15	1126	275	3	15.9977	1.38	0.252	11	7	1.41	154.035	FALSE	TRUE	FALSE	8.41
121.307	31.3273	上海市	嘉定	15.4	1054	413.5	3	15.9977	1.38	0.252	11	7	1.41	154.035	FALSE	TRUE	FALSE	12.97
121.307	31.3273	上海市	嘉定	15	1126	0	3	15.9977	1.38	0.252	11	7	1.41	154.035	FALSE	FALSE	TRUE	1.2
121.307	31.3273	上海市	嘉定	15	1126	0	3	15.9977	1.38	0.252	11	7	1.41	154.035	FALSE	FALSE	TRUE	1.37
121.307	31.3273	上海市	嘉定	15	1126	0	3	15.9977	1.38	0.252	11	7	1.41	154.035	FALSE	TRUE	FALSE	4.52
121.307	31.3273	上海市	嘉定	15	1126	0	3	15.9977	1.38	0.252	11	7	1.41	154.035	FALSE	TRUE	FALSE	4.98
121.307	31.3273	上海市	嘉定	15.4	1054	0	3	15.9977	1.38	0.252	11	7	1.41	154.035	FALSE	TRUE	FALSE	5.89
121.24	31.4	上海市	嘉定	15.7	1040	250	3	15.4292	1.38	0.08	7	7	1.17	220.844	FALSE	TRUE	FALSE	10.1
121.24	31.4	上海市	嘉定	15.7	1040	0	3	15.4292	1.38	0.08	7	7	1.17	220.844	FALSE	FALSE	TRUE	1.2
121.24	31.4	上海市	嘉定	15.7	1040	0	3	15.4292	1.38	0.08	7	7	1.17	220.844	FALSE	FALSE	TRUE	1.37
121.24	31.4	上海市	嘉定	15.7	1040	0	3	15.4292	1.38	0.08	7	7	1.17	220.844	FALSE	TRUE	FALSE	4.52
121.24	31.4	上海市	嘉定	15.7	1040	0	3	15.4292	1.38	0.08	7	7	1.17	220.844	FALSE	TRUE	FALSE	4.98
103.15	24.55	云南省	昆明	15.7	900	240	3	14.2941	0.48	0.5	21	6.86	1.2301	8.2498	TRUE	FALSE	FALSE	8.21
103.15	24.55	云南省	昆明	15.7	900	0	3	14.2941	0.48	0.5	21	6.86	1.2301	8.2498	TRUE	FALSE	FALSE	3.71
100.122	25.8266	云南省	大理	14	1077	105	3	37.3144	3.95	0.23	13	7.35	1.31	20.2094	FALSE	TRUE	FALSE	4.57421
100.122	25.8266	云南省	大理	14	1077	0	3	37.3144	3.95	0.23	13	7.35	1.31	20.2094	FALSE	TRUE	FALSE	1.69265
100.124	25.8282	云南省	大理	14	1081	0	3	9.8	1	0.355	13	6.6	1.31	62	FALSE	TRUE	FALSE	1.74
100.117	25.8333	云南省	大理	15.1	1048	156	3	33.24	3.3	0.23	13	7.1	1.31	21	FALSE	TRUE	FALSE	34.84
100.117	25.8333	云南省	大理	15.1	1048	195	3	33.2367	3.3	0.23	13	7.1	1.31	20.512	FALSE	TRUE	FALSE	51.77
100.117	25.8333	云南省	大理	15.1	1048	0	3	33.2367	3.3	0.23	13	7.1	1.31	20.512	FALSE	TRUE	FALSE	7.59
100.174	25.8928	云南省	大理	14.6	1048	156	3	33.2367	3.3	0.32	13	7.1	1.31	62	FALSE	TRUE	FALSE	32.3
100.174	25.8928	云南省	大理	14.6	1048	195	3	33.2367	3.3	0.32	13	7.1	1.31	62	FALSE	TRUE	FALSE	32.26
100.174	25.8928	云南省	大理	14.6	1048	0	3	33.2367	3.3	0.32	13	7.1	1.31	62	FALSE	TRUE	FALSE	19.42
100.174	25.8928	云南省	大理	14.6	908.8	80	3	43.1555	4.8	0.23	13	6.98	1.34	22.0901	FALSE	TRUE	FALSE	6.82134
100.174	25.8928	云南省	大理	14.6	908.8	0	3	43.1555	4.8	0.23	13	6.98	1.34	22.0901	FALSE	TRUE	FALSE	2.48151
116.808	40.658	北京市	密云	8	654	300	3	3.7413	0.25	0.212	13	6.45822	1.42652	145	TRUE	FALSE	FALSE	5.527
116.808	40.658	北京市	密云	8	654	0	3	3.7413	0.25	0.212	13	6.45822	1.42652	145	TRUE	FALSE	FALSE	4.23
125.4	43.8	吉林省	长春	5	570.3	240	3	17.152	1.68	0.23	20	6.63	1.3	23.8732	TRUE	FALSE	FALSE	2.28
125.4	43.8	吉林省	长春	5	570.3	0	3	17.152	1.68	0.23	20	6.63	1.3	23.8732	TRUE	FALSE	FALSE	0.78
125.404	43.8146	吉林省	长春	4.8	520	240	3	17.0766	1.58	0.295	20	6.7	1.3	24.6008	TRUE	FALSE	FALSE	2.2767
125.404	43.8146	吉林省	长春	4.8	520	0	3	17.0766	1.58	0.295	20	6.7	1.3	24.6008	TRUE	FALSE	FALSE	0.7801
125.399	43.9976	吉林省	长春	4.8	568.5	135	3	12.413	1.5	0.23	20	6.33925	1.29352	32.4628	FALSE	TRUE	FALSE	27.72
125.399	43.9976	吉林省	长春	4.8	568.5	160	3	12.413	1.5	0.287	20	6.4	1.3	32.4628	FALSE	TRUE	FALSE	27.67
125.435	44.5811	吉林省	长春	4.8	568.5	200	3	17.15	1.68	0.22	17	6.63	1.28	19	TRUE	FALSE	FALSE	1.7
125.435	44.5811	吉林省	长春	4.8	568.5	240	3	17.152	1.68	0.22	17	6.63	1.27742	18.697	TRUE	FALSE	FALSE	2
125.435	44.5811	吉林省	长春	4.8	568.5	0	3	17.152	1.68	0.22	17	6.63	1.27742	18.697	TRUE	FALSE	FALSE	1.2
104.189	30.0263	四川省	眉山	17.4	976	375	3	2.95824	0.82	0.21	11	8.18	1.38771	57.7161	TRUE	FALSE	FALSE	0.323
104.57	30.0867	四川省	资阳	16.8	965.8	300	3	5.33643	0.53	0.449	12	7.9	1.3	50.0727	TRUE	FALSE	FALSE	1.3
104.57	30.0867	四川省	资阳	16.8	965.8	0	3	5.33643	0.53	0.449	12	7.9	1.3	50.0727	TRUE	FALSE	FALSE	1.6
104.57	30.0867	四川省	资阳	16.8	965.8	0	3	5.33643	0.53	0.449	12	7.9	1.3	50.0727	TRUE	FALSE	FALSE	1.6
103.864	30.2508	四川省	眉山	16	1052	120	3	11.2	1.74185	0.21	11	7.8	1.41	106.352	FALSE	TRUE	FALSE	0.3
104.401	31.0039	四川省	德阳	16.5	910	210	3	29.2923	2.78	0.249	1	6.9	1.4	105.491	FALSE	TRUE	FALSE	3.74
104.401	31.0039	四川省	德阳	16.5	910	210	3	29.2923	2.78	0.249	1	6.9	1.4	105.491	FALSE	TRUE	FALSE	5.57
104.401	31.0039	四川省	德阳	16.5	910	210	3	29.2923	2.78	0.249	1	6.9	1.4	105.491	FALSE	TRUE	FALSE	6.88
105.45	31.2667	四川省	绵阳	17.3	836	280	3	5.07541	0.81	0.065	17	8	1.34	25.5773	TRUE	FALSE	FALSE	0.382
105.45	31.2667	四川省	绵阳	15	826	150	3	7.5	0.616999	0.21	17	8	1.37	25.5773	TRUE	FALSE	FALSE	1.62
105.45	31.2667	四川省	绵阳	17.3	826	150	3	6.57193	0.75	0.215	17	8.36	1.54	56	TRUE	FALSE	FALSE	8.98
105.45	31.2667	四川省	绵阳	17.3	948	280	3	5.07541	0.81	0.223	17	8.2	1.34	25.5773	TRUE	FALSE	FALSE	2.88
105.45	31.2667	四川省	绵阳	17.3	948	0	3	5.07541	0.81	0.223	17	8.2	1.34	25.5773	TRUE	FALSE	FALSE	1.64
105.467	31.2667	四川省	绵阳	17.3	826	0	3	6.35	0.55	0.129	17	8.3	1.32	26.6953	TRUE	FALSE	FALSE	1.13
106.467	31.2833	四川省	南充	17.3	826	150	3	4.21	0.25	0.391	11	8	1.39	80	TRUE	FALSE	FALSE	17.9
106.467	31.2833	四川省	南充	17.3	824	310	3	6.35	0.55	0.192	11	8.3	1.32	80	TRUE	FALSE	FALSE	1.08
117.774	39.334	天津市	宁河	11	560	225.73	3	10.1276	0.11	0.17	10	8.42	1.35772	125.103	FALSE	TRUE	FALSE	4.77
117.774	39.334	天津市	宁河	11	560	0	3	10.1276	0.11	0.17	10	8.42	1.35772	125.103	FALSE	TRUE	FALSE	2.08
106.193	38.1239	宁夏回族自治区	吴忠	8.9	180	240	3	9.33875	0.9	0.21	11	8.49	1.41	92.2375	FALSE	TRUE	FALSE	29.63
106.267	38.1333	宁夏回族自治区	银川	8.5	200	240	3	8.12	0.99	0.18	11	8.5	1.41	63	FALSE	TRUE	FALSE	3.46
106.267	38.1333	宁夏回族自治区	银川	8.5	200	300	3	8.12065	0.99	0.18	11	8.5	1.41	62.6968	FALSE	TRUE	FALSE	3.5
106.267	38.1333	宁夏回族自治区	银川	8.5	200	0	3	8.12065	0.99	0.18	11	8.5	1.41	62.6968	FALSE	TRUE	FALSE	0.77
117.66	30.7587	安徽省	池州	16	1563	200	3	16.0325	1.3	0.447	13	6.2	1.35	192.962	FALSE	TRUE	FALSE	19.53
117.66	30.7587	安徽省	池州	16	1563	0	3	16.0325	1.3	0.447	13	6.2	1.35	192.962	FALSE	TRUE	FALSE	2.99
117.046	30.9244	安徽省	安庆	15.8	1326.9	209.9	3	8.90371	0.82	0.156	11	6.55	1.41	187.414	FALSE	TRUE	FALSE	3.16
117.046	30.9244	安徽省	安庆	15.8	1326.9	209.9	3	8.90371	0.82	0.156	11	6.55	1.41	187.414	FALSE	TRUE	FALSE	4.38
117.017	30.95	安徽省	安庆	16.4	1268.7	165	3	11.3979	1.54	0.156	11	6.18	1.47	182.211	FALSE	FALSE	TRUE	18.13
117.017	30.95	安徽省	安庆	16.4	1268.7	0	3	11.3979	1.54	0.156	11	6.18	1.47	182.211	FALSE	FALSE	TRUE	7.94
117.891	31.6149	安徽省	合肥	15.5	1100	0	3	22.0418	1.72	0.21	11	6.95	1.46143	210.058	FALSE	TRUE	FALSE	4.41
117.793	31.6458	安徽省	合肥	16	996	150	3	19.76	1.58	0.21	11	6.99	1.41	190	FALSE	TRUE	FALSE	1.33
117.793	31.6458	安徽省	合肥	16	996	150	3	19.76	1.58	0.21	11	6.99	1.41	190	FALSE	FALSE	TRUE	3.02
117.793	31.6458	安徽省	合肥	16	996	180	3	19.76	1.58	0.21	11	6.99	1.41	190	FALSE	TRUE	FALSE	1.73
117.793	31.6458	安徽省	合肥	16	996	180	3	19.76	1.58	0.21	11	6.99	1.41	190	FALSE	FALSE	TRUE	2.82
117.793	31.6458	安徽省	合肥	16	996	210	3	19.7622	1.58	0.21	11	6.99	1.40968	190.115	FALSE	TRUE	FALSE	1.74
117.793	31.6458	安徽省	合肥	16	996	210	3	19.7622	1.58	0.21	11	6.99	1.40968	190.115	FALSE	FALSE	TRUE	3.056
117.793	31.6458	安徽省	合肥	16	996	0	3	19.7622	1.58	0.21	11	6.99	1.40968	190.115	FALSE	TRUE	FALSE	1.277
117.793	31.6458	安徽省	合肥	16	996	0	3	19.7622	1.58	0.21	11	6.99	1.40968	190.115	FALSE	FALSE	TRUE	1.74
117.793	31.6458	安徽省	合肥	16.1	1113	180	3	14.0951	1.12	0.323	11	7.02	1.41	190	FALSE	FALSE	TRUE	2.808
117.793	31.6458	安徽省	合肥	16	996	206	3	34.07	1.58	0.49	11	6.99	1.41	190.115	FALSE	FALSE	TRUE	3.59
117.793	31.6458	安徽省	合肥	16	996	206	3	34.07	1.58	0.49	11	6.99	1.41	190.115	FALSE	FALSE	TRUE	5.25
117.793	31.6458	安徽省	合肥	16	996	210	3	34.07	1.58	0.49	11	6.99	1.41	190.12	FALSE	FALSE	TRUE	3.1
117.793	31.6458	安徽省	合肥	16.1	1113	210	3	14.0951	1.12	0.323	11	7.02	1.41	190.115	FALSE	FALSE	TRUE	4.011
117.793	31.6458	安徽省	合肥	16	996	210	3	34.07	1.58	0.49	11	6.99	1.41	190.12	FALSE	FALSE	TRUE	4.94
117.793	31.6458	安徽省	合肥	16	996	214	3	34.07	1.58	0.49	11	6.99	1.41	190.115	FALSE	TRUE	FALSE	2.54
117.793	31.6458	安徽省	合肥	16	996	214	3	34.07	1.58	0.49	11	6.99	1.41	190.115	FALSE	TRUE	FALSE	16.8
117.793	31.6458	安徽省	合肥	16	996	225	3	34.07	1.58	0.49	11	6.99	1.41	190.12	FALSE	TRUE	FALSE	2.71
117.793	31.6458	安徽省	合肥	16	996	225	3	34.07	1.58	0.49	11	6.99	1.41	190.12	FALSE	TRUE	FALSE	16.77
117.793	31.6458	安徽省	合肥	16	996	0	3	34.07	1.58	0.49	11	6.99	1.41	190.115	FALSE	TRUE	FALSE	1.4
117.793	31.6458	安徽省	合肥	16	996	0	3	34.07	1.58	0.49	11	6.99	1.41	190.115	FALSE	FALSE	TRUE	2.09
117.793	31.6458	安徽省	合肥	16	996	0	3	34.07	1.58	0.49	11	6.99	1.41	190.115	FALSE	FALSE	TRUE	2.42
117.793	31.6458	安徽省	合肥	16	996	0	3	34.07	1.58	0.49	11	6.99	1.41	190.115	FALSE	TRUE	FALSE	6.48
117.694	31.6602	安徽省	合肥	16.5	1200	234	3	16.7111	1.82	0.21	11	6.48	1.41	166.467	FALSE	TRUE	FALSE	15.61
117.694	31.6602	安徽省	合肥	16.5	1200	234	3	16.7111	1.82	0.21	11	6.48	1.41	166.467	FALSE	TRUE	FALSE	18.06
117.694	31.6602	安徽省	合肥	16.5	1200	234	3	16.7111	1.82	0.21	11	6.48	1.41	166.467	FALSE	TRUE	FALSE	27.04
117.694	31.6602	安徽省	合肥	16.5	1200	0	3	16.7111	1.82	0.21	11	6.48	1.41	166.467	FALSE	TRUE	FALSE	6.94
117.694	31.6602	安徽省	合肥	16.5	1200	0	3	16.7111	1.82	0.21	11	6.48	1.41	166.467	FALSE	TRUE	FALSE	9.59
117.694	31.6602	安徽省	合肥	16.5	1200	0	3	16.7111	1.82	0.21	11	6.48	1.41	166.467	FALSE	TRUE	FALSE	18.37
117.694	31.6603	安徽省	合肥	15.5	1100	125	3	14.0893	1.13	0.25	11	6.03	1.41	166.467	FALSE	TRUE	FALSE	13.95
117.694	31.6603	安徽省	合肥	15.5	1100	0	3	14.0893	1.13	0.25	11	6.03	1.41	166.467	FALSE	TRUE	FALSE	5.62
117.683	31.6619	安徽省	合肥	16.1	1215	192	3	15.4118	1.21	0.21	11	6.97	1.41	164.021	FALSE	TRUE	FALSE	9.43
117.683	31.6619	安徽省	合肥	16.1	1215	0	3	15.4118	1.21	0.21	11	6.97	1.41	164.021	FALSE	TRUE	FALSE	4.73
117.683	31.6619	安徽省	合肥	16.1	1105	240	3	19.6056	1.49	0.25	11	7.21	1.41	164.021	FALSE	FALSE	TRUE	1.704
117.683	31.6619	安徽省	合肥	15	1215	240	3	10.8759	1.02	0.25	11	6.52	1.41	164.021	FALSE	FALSE	TRUE	33.66
117.683	31.6619	安徽省	合肥	15	1215	0	3	10.8759	1.02	0.25	11	6.52	1.41	164.021	FALSE	FALSE	TRUE	21.9
117.68	31.6658	安徽省	合肥	16.8	1360	210	3	19.9304	1.3	0.49	11	6.18	1.41	165.887	FALSE	FALSE	TRUE	14.7
117.68	31.6658	安徽省	合肥	16.8	1360	225	3	19.9304	1.3	0.49	11	6.18	1.41	165.887	FALSE	TRUE	FALSE	11.76
117.68	31.6658	安徽省	合肥	16.8	1360	0	3	19.9304	1.3	0.49	11	6.18	1.41	165.887	FALSE	FALSE	TRUE	5.78
117.68	31.6658	安徽省	合肥	16.8	1360	0	3	19.9304	1.3	0.49	11	6.18	1.41	165.887	FALSE	TRUE	FALSE	6.85
117.68	31.6658	安徽省	合肥	16.8	1358	225	3	19.9304	1.34	0.21	11	6.18	1.41	165.887	FALSE	TRUE	FALSE	6.09
117.68	31.6658	安徽省	合肥	16.8	1358	0	3	19.9304	1.34	0.21	11	6.18	1.41	165.887	FALSE	TRUE	FALSE	3.4
117.68	31.666	安徽省	合肥	16.8	1360	157.5	3	19.95	1.3	0.49	11	6.2	1.41	166	FALSE	FALSE	TRUE	4
117.68	31.666	安徽省	合肥	16.8	1360	157.5	3	19.95	1.3	0.49	11	6.2	1.41	166	FALSE	FALSE	TRUE	4.4
117.68	31.666	安徽省	合肥	16.8	1360	210	3	19.9536	1.3	0.49	11	6.2	1.41	165.887	FALSE	FALSE	TRUE	6.8
117.68	31.666	安徽省	合肥	16.8	1360	210	3	19.9536	1.3	0.49	11	6.2	1.41	165.887	FALSE	FALSE	TRUE	6.9
117.68	31.666	安徽省	合肥	16.8	1360	0	3	19.9536	1.3	0.49	11	6.2	1.41	165.887	FALSE	FALSE	TRUE	2
117.68	31.666	安徽省	合肥	16.8	1360	0	3	19.9536	1.3	0.49	11	6.2	1.41	165.887	FALSE	FALSE	TRUE	2.2
117.68	31.6664	安徽省	合肥	16.8	1050	192	3	17.28	1.28	0.21	11	6.93	1.41	165.887	FALSE	TRUE	FALSE	28.89
117.68	31.6664	安徽省	合肥	16.8	1050	0	3	17.28	1.28	0.21	11	6.93	1.41	165.887	FALSE	TRUE	FALSE	15.74
117.25	31.7	安徽省	合肥	15	1160	225	3	11.43	1.1	0.21	11	5.9	1.41	240	FALSE	TRUE	FALSE	14.67
117.25	31.7	安徽省	合肥	15	1160	255	3	11.4269	1.09822	0.21	11	5.9	1.41	240.043	FALSE	FALSE	TRUE	5.554
117.25	31.7	安徽省	合肥	15	1160	270	3	11.4269	1.09822	0.21	11	5.9	1.41	240.043	FALSE	TRUE	FALSE	15.338
117.25	31.7	安徽省	合肥	15	1160	0	3	11.4269	1.09822	0.21	11	5.9	1.41	240.043	FALSE	FALSE	TRUE	2.092
117.25	31.7	安徽省	合肥	15	1160	0	3	11.4269	1.09822	0.21	11	5.9	1.41	240.043	FALSE	TRUE	FALSE	4.315
116.957	31.7453	安徽省	合肥	15.5	1111	241	3	14.3561	1.45	0.249	12	5.1	1.3	235.547	TRUE	FALSE	FALSE	12.63
116.957	31.7453	安徽省	合肥	15.5	1111	0	3	14.3561	1.45	0.249	12	5.1	1.3	235.547	TRUE	FALSE	FALSE	5.17
116.96	31.7487	安徽省	合肥	15.7	1000	206	3	13.5383	1.38	0.2	12	6.95	1.29959	235.547	FALSE	TRUE	FALSE	17.68
117.086	31.8495	安徽省	合肥	15	1030	132	3	11.1999	1.21096	0.21	11	7.79981	1.41001	229.035	FALSE	TRUE	FALSE	8.3665
117.086	31.8495	安徽省	合肥	15	1030	195	3	11.1999	1.21096	0.21	11	7.79981	1.41001	229.035	TRUE	FALSE	FALSE	14.6685
117.282	31.866	安徽省	合肥	15.5	1000	180	3	9.84919	1.24	0.2	11	5.6	1.31	265.424	FALSE	TRUE	FALSE	6.23
117.213	31.9187	安徽省	合肥	15.5	1000	150	3	9.86	1.2	0.403	11	6.61	1.31	252.483	FALSE	FALSE	TRUE	1.065
117.213	31.9187	安徽省	合肥	15.5	1000	225	3	9.84919	1.24	0.21	11	6.61	1.31	252.483	TRUE	FALSE	FALSE	3.04
117.15	31.9333	安徽省	合肥	15.5	1000	150	3	9.9	1.2	0.403	20.8	6.6	1.31	237.893	FALSE	FALSE	TRUE	0.147
117.15	31.9333	安徽省	合肥	15.5	1000	150	3	9.9	1.2	0.403	20.8	6.6	1.31	237.893	FALSE	FALSE	TRUE	0.53
117.15	31.9333	安徽省	合肥	15.5	1000	150	3	9.9	1.2	0.403	20.8	6.6	1.31	237.893	FALSE	FALSE	TRUE	1.067
118.285	32.3901	安徽省	滁州	16	1000	205.5	3	9.71578	0.96	0.443	11	5.7	1.41	176.774	FALSE	FALSE	TRUE	16.59
118.285	32.3901	安徽省	滁州	16	1000	205.5	3	9.71578	0.96	0.443	11	5.7	1.41	176.774	FALSE	FALSE	TRUE	22.03
118.285	32.3901	安徽省	滁州	16	1000	205.5	3	9.71578	0.96	0.443	11	5.7	1.41	176.774	FALSE	FALSE	TRUE	26.52
118.285	32.3901	安徽省	滁州	16	1000	210	3	9.71578	0.96	0.443	11	5.7	1.41	176.774	FALSE	TRUE	FALSE	8.29
118.285	32.3901	安徽省	滁州	16	1000	210	3	9.71578	0.96	0.443	11	5.7	1.41	176.774	FALSE	TRUE	FALSE	10.96
117.36	33.15	安徽省	蚌埠	15	911	114	3	5.7345	0.921492	0.18	14	8.09624	1.39398	101.897	TRUE	FALSE	FALSE	1.607
117.36	33.15	安徽省	蚌埠	15	911	0	3	5.7345	0.921492	0.18	14	8.09624	1.39398	101.897	TRUE	FALSE	FALSE	1.051
116.567	34.45	安徽省	宿州	13.7	650	240	3	8.87471	0.78	0.249	28	8.3	1.41	233.481	FALSE	FALSE	TRUE	1.25
116.567	34.45	安徽省	宿州	13.7	650	0	3	8.87471	0.78	0.249	28	8.3	1.41	233.481	FALSE	FALSE	TRUE	0.36
117.149	34.7828	山东省	济宁	13	635	240	3	8.87471	0.740214	0.19	13	8.3	1.37848	153.11	TRUE	FALSE	FALSE	2.98
117.149	34.7828	山东省	济宁	13	635	345	3	8.87471	0.740214	0.19	13	8.3	1.37848	153.11	FALSE	FALSE	TRUE	1.24
117.149	34.7828	山东省	济宁	13	635	0	3	8.87471	0.740214	0.19	13	8.3	1.37848	153.11	FALSE	FALSE	TRUE	0.38
117.149	34.7828	山东省	济宁	13	635	0	3	8.87471	0.740214	0.19	13	8.3	1.37848	153.11	TRUE	FALSE	FALSE	0.88
117.149	34.7828	山东省	济宁	13	635	180	3	8.87	0.74	0.19	13	8.3	1.38	153	FALSE	FALSE	TRUE	1.12
117.149	34.7828	山东省	济宁	13	635	180	3	8.87	0.74	0.19	13	8.3	1.38	153	TRUE	FALSE	FALSE	2.48
118.357	35.1048	山东省	临沂	14.1	840	0	3	9	1.44	0.06	10.25	6.46	1.39999	122.014	FALSE	TRUE	FALSE	1.65
116.39	35.13	山东省	济宁	13.7	773.6	180	3	8.87	0.44	0.06	6	8.3	1.4	326	TRUE	FALSE	FALSE	10.89
116.39	35.13	山东省	济宁	13.7	773.6	345	3	8.87471	0.444514	0.06	6	8.3	1.39928	326.13	TRUE	FALSE	FALSE	11.89
116.39	35.13	山东省	济宁	13.7	773.6	0	3	8.87471	0.444514	0.06	6	8.3	1.39928	326.13	TRUE	FALSE	FALSE	9.71
117.167	36.0833	山东省	泰安	15.1	700	222.5	2	5.1	3.85	0.078	14	5.7	1.28	118.46	TRUE	FALSE	FALSE	169.3
117.15	36.17	山东省	泰安	12	697	112	3	8.23666	0.621	0.153	16	6.3	1.54	300	TRUE	FALSE	FALSE	8.05
117.15	36.17	山东省	泰安	12	697	112	3	8.23666	0.621	0.153	16	6.3	1.54	300	TRUE	FALSE	FALSE	9.1
117.15	36.17	山东省	泰安	12	697	112	3	8.23666	0.621	0.153	16	6.3	1.54	300	TRUE	FALSE	FALSE	10.28
117.15	36.17	山东省	泰安	12	697	112	3	8.23666	0.621	0.153	16	6.3	1.54	300	TRUE	FALSE	FALSE	10.42
117.15	36.17	山东省	泰安	12	697	112	3	8.23666	0.621	0.153	16	6.3	1.54	300	TRUE	FALSE	FALSE	11.1
117.15	36.17	山东省	泰安	12	697	112	3	8.23666	0.621	0.153	16	6.3	1.54	300	TRUE	FALSE	FALSE	12.78
117.15	36.17	山东省	泰安	12	697	0	3	8.23666	0.621	0.153	16	6.3	1.54	300	TRUE	FALSE	FALSE	4.4
117.15	36.17	山东省	泰安	12	697	0	3	8.23666	0.621	0.153	16	6.3	1.54	300	TRUE	FALSE	FALSE	4.7
117.15	36.17	山东省	泰安	12	697	0	3	8.23666	0.621	0.153	16	6.3	1.54	300	TRUE	FALSE	FALSE	5.8
116.322	37.4601	山东省	德州	12.9	547.5	255	3	7.63921	0.8	0.32	13	8.59	1.36784	137.317	TRUE	FALSE	FALSE	0.03
116.322	37.4601	山东省	德州	12.9	547.5	255	3	7.63921	0.8	0.32	13	8.59	1.36784	137.317	TRUE	FALSE	FALSE	0.09
116.322	37.4601	山东省	德州	12.9	547.5	315	3	7.63921	0.8	0.32	13	8.59	1.36784	137.317	FALSE	FALSE	TRUE	0.02
116.322	37.4601	山东省	德州	12.9	547.5	315	3	7.63921	0.8	0.32	13	8.59	1.36784	137.317	FALSE	FALSE	TRUE	0.04
110.776	21.7886	广东省	茂名	22.8	1893	68	3	12.471	1.08	0.21	11	5.6	1.41	99.6081	FALSE	TRUE	FALSE	2.9304
110.776	21.7886	广东省	茂名	22.8	1893	69	3	12.471	1.08	0.21	11	5.6	1.41	99.6081	FALSE	TRUE	FALSE	10.3896
110.776	21.7886	广东省	茂名	22.8	1893	72	3	12.471	1.08	0.21	11	5.6	1.41	99.6081	FALSE	TRUE	FALSE	12.3386
110.776	21.7886	广东省	茂名	22.8	1893	91	3	12.471	1.08	0.21	11	5.6	1.41	99.6081	FALSE	TRUE	FALSE	52.6014
110.776	21.7886	广东省	茂名	22.8	1893	0	3	12.471	1.08	0.21	11	5.6	1.41	99.6081	FALSE	TRUE	FALSE	2.5476
110.776	21.7886	广东省	茂名	22.8	1893	0	3	12.471	1.08	0.21	11	5.6	1.41	99.6081	FALSE	TRUE	FALSE	5.6373
110.776	21.7886	广东省	茂名	22.8	1893	0	3	12.471	1.08	0.21	11	5.6	1.41	99.6081	FALSE	TRUE	FALSE	9.0324
110.776	21.7886	广东省	茂名	22.8	1893	0	3	12.471	1.08	0.21	11	5.6	1.41	99.6081	FALSE	TRUE	FALSE	24.0327
113.538	22.7169	广东省	广州	21	1732	318	3	11.6589	1.72	0.371	13	6.46	1.35	124	TRUE	FALSE	FALSE	1.71
113.538	22.7169	广东省	广州	22	1982.7	318	3	11.66	1.72	0.23	13	6.46	1.35	124	TRUE	FALSE	FALSE	2.89
113.538	22.7169	广东省	广州	21	1732	397.5	3	11.6589	1.72	0.371	13	6.46	1.35	123.577	TRUE	FALSE	FALSE	3.48
113.538	22.7169	广东省	广州	22	1982.7	397.5	3	11.6589	1.72	0.23	13	6.46	1.35	123.577	TRUE	FALSE	FALSE	3.54
113.538	22.7169	广东省	广州	22	1982.7	0	3	11.6589	1.72	0.23	13	6.46	1.35	123.577	TRUE	FALSE	FALSE	1.05
113.538	22.7169	广东省	广州	21	1732	0	3	11.6589	1.72	0.371	13	6.46	1.35	123.577	TRUE	FALSE	FALSE	1.38
113.333	23.1333	广东省	广州	21	1703	150	3	23.96	1.62	0.21	16	6	1.36	82	FALSE	TRUE	FALSE	13.3
113.333	23.1333	广东省	广州	21	1703	180	3	23.96	1.62	0.21	16	6	1.36	82	FALSE	TRUE	FALSE	10.3
113.333	23.1333	广东省	广州	21	1703	210	3	23.9559	1.62	0.21	16	6	1.36	82.2157	FALSE	TRUE	FALSE	15.7
113.333	23.1333	广东省	广州	21	1703	0	3	23.9559	1.62	0.21	16	6	1.36	82.2157	FALSE	TRUE	FALSE	1.62
113.333	23.1333	广东省	广州	21	1703	0	3	23.9559	1.62	0.21	16	6	1.36	82.2157	FALSE	TRUE	FALSE	5.3
113.333	23.1333	广东省	广州	25.8	1703	150	3	23.9559	1.62	0.214	16	6	1.36	82	FALSE	TRUE	FALSE	12.8
113.333	23.1333	广东省	广州	25.8	1703	180	3	23.9559	1.62	0.214	16	6	1.36	82	FALSE	TRUE	FALSE	10.1
113.333	23.1333	广东省	广州	25.8	1703	180	3	23.9559	1.62	0.214	16	6	1.36	82.2157	FALSE	TRUE	FALSE	22.9
113.333	23.1333	广东省	广州	25.8	1703	210	3	23.9559	1.62	0.214	16	6	1.36	82.2157	FALSE	TRUE	FALSE	15.5
113.717	23.2	广东省	广州	21.8	1922	142	3	14.0371	1.39	0.21	11	6.4	1.41	138.051	FALSE	TRUE	FALSE	3.29
113.717	23.2	广东省	广州	21.8	1922	142	3	14.0371	1.39	0.21	11	6.4	1.41	138.051	FALSE	TRUE	FALSE	6.4182
113.717	23.2	广东省	广州	21.8	1922	143	3	14.0371	1.39	0.21	11	6.4	1.41	138.051	FALSE	TRUE	FALSE	10.4718
113.717	23.2	广东省	广州	21.8	1922	143	3	14.0371	1.39	0.21	11	6.4	1.41	138.051	FALSE	TRUE	FALSE	13.16
113.717	23.2	广东省	广州	21.8	1922	0	3	14.0371	1.39	0.21	11	6.4	1.41	138.051	FALSE	TRUE	FALSE	2.952
113.717	23.2	广东省	广州	21.8	1922	0	3	14.0371	1.39	0.21	11	6.4	1.41	138.051	FALSE	TRUE	FALSE	6.3536
113.717	23.2	广东省	广州	21.8	1922	0	3	14.0371	1.39	0.21	11	6.4	1.41	138.051	FALSE	TRUE	FALSE	10.3664
113.717	23.2	广东省	广州	21.8	1922	0	3	14.0371	1.39	0.21	11	6.4	1.41	138.051	FALSE	TRUE	FALSE	11.808
113.826	23.291	广东省	广州	22.2	1800	107	3	12.877	1.45	0.21	11	6.4	1.4104	126.935	FALSE	TRUE	FALSE	22.84
113.826	23.291	广东省	广州	22.2	1800	168	3	12.877	1.45	0.21	11	6.4	1.4104	126.935	FALSE	TRUE	FALSE	12.09
113.826	23.291	广东省	广州	22.2	1800	0	3	12.877	1.45	0.21	11	6.4	1.4104	126.935	FALSE	TRUE	FALSE	8.83
113.826	23.291	广东省	广州	22.2	1800	0	3	12.877	1.45	0.21	11	6.4	1.4104	126.935	FALSE	TRUE	FALSE	13.7
112.944	24.3486	广东省	清远	20.3	1876	181	3	13.2251	1.28	0.47	27	6.2	1.31357	41.1522	FALSE	TRUE	FALSE	22.0332
112.944	24.3486	广东省	清远	20.3	1876	208	3	13.2251	1.28	0.47	27	6.2	1.31357	41.1522	FALSE	TRUE	FALSE	3.5868
112.944	24.3486	广东省	清远	20.3	1876	232	3	13.2251	1.28	0.47	27	6.2	1.31357	41.1522	FALSE	TRUE	FALSE	20.9066
112.944	24.3486	广东省	清远	20.3	1876	254	3	13.2251	1.28	0.47	27	6.2	1.31357	41.1522	FALSE	TRUE	FALSE	3.4034
112.944	24.3486	广东省	清远	20.3	1876	0	3	13.2251	1.28	0.47	27	6.2	1.31357	41.1522	FALSE	TRUE	FALSE	1.8438
112.944	24.3486	广东省	清远	20.3	1876	0	3	13.2251	1.28	0.47	27	6.2	1.31357	41.1522	FALSE	TRUE	FALSE	2.4542
112.944	24.3486	广东省	清远	20.3	1876	0	3	13.2251	1.28	0.47	27	6.2	1.31357	41.1522	FALSE	TRUE	FALSE	11.3262
112.944	24.3486	广东省	清远	20.3	1876	0	3	13.2251	1.28	0.47	27	6.2	1.31357	41.1522	FALSE	TRUE	FALSE	15.0758
110.131	25.8297	广西壮族自治区	桂林	15.1	1048	173	2	12	1.87106	0.188	27	7	1.31	61	FALSE	TRUE	FALSE	1.7148
110.131	25.8297	广西壮族自治区	桂林	15.1	1048	0	2	12	1.87106	0.188	27	7	1.31	61	FALSE	TRUE	FALSE	0.6886
120.407	31.0641	江苏省	苏州	15	1201	200	3	11.2	1.23	0.132	20	7.8	1.41	241	FALSE	TRUE	FALSE	0.63
120.407	31.0641	江苏省	苏州	15	1201	200	3	11.2	1.23	0.132	20	7.8	1.41	241	FALSE	TRUE	FALSE	0.8
120.407	31.0641	江苏省	苏州	15	1201	200	3	11.2	1.23	0.132	20	7.8	1.41	241	FALSE	TRUE	FALSE	0.89
120.407	31.0641	江苏省	苏州	15	1201	270	3	11.2	1.23	0.132	20	7.8	1.41	241	FALSE	TRUE	FALSE	1.03
120.407	31.0641	江苏省	苏州	15	1201	270	3	11.2	1.23	0.132	20	7.8	1.41	241	FALSE	TRUE	FALSE	1.13
120.791	31.0756	江苏省	苏州	15	1172	337.5	9	11.2	1.32683	0.21	23	7.8	1.41	152.552	FALSE	TRUE	FALSE	30.44
120.791	31.0756	江苏省	苏州	15	1172	0	9	11.2	1.32683	0.21	23	7.8	1.41	152.552	FALSE	TRUE	FALSE	15.36
120.962	31.2542	江苏省	苏州	15.5	1100	302.7	3	12.703	1.03	0.21	11	7.8	1.41	216.844	FALSE	TRUE	FALSE	4.56
120.962	31.2542	江苏省	苏州	15.5	1100	324.6	3	12.703	1.03	0.21	11	7.8	1.41	216.844	FALSE	TRUE	FALSE	14.53
120.962	31.2542	江苏省	苏州	15.5	1100	184.88	3	12.703	1.03	0.132	11	7.8	1.41	216.84	FALSE	TRUE	FALSE	5.29
120.962	31.2542	江苏省	苏州	15.5	1100	184.88	3	12.703	1.03	0.132	11	7.8	1.41	216.84	FALSE	TRUE	FALSE	5.6
120.962	31.2542	江苏省	苏州	15.5	1100	198	3	12.703	1.03	0.132	11	7.8	1.41	216.84	FALSE	TRUE	FALSE	2.49
120.962	31.2542	江苏省	苏州	15.5	1100	198	3	12.703	1.03	0.132	11	7.8	1.41	216.84	FALSE	TRUE	FALSE	3.26
120.962	31.2542	江苏省	苏州	15.5	1100	302.7	3	12.703	1.03	0.132	11	7.8	1.41	216.844	FALSE	TRUE	FALSE	4.21
120.962	31.2542	江苏省	苏州	15.5	1100	302.7	3	12.703	1.03	0.132	11	7.8	1.41	216.844	FALSE	TRUE	FALSE	4.92
120.962	31.2542	江苏省	苏州	15.5	1100	324.6	3	12.703	1.03	0.132	11	7.8	1.41	216.844	FALSE	TRUE	FALSE	16.9
119.923	31.2715	江苏省	无锡	16	1250	243	3	16.0267	1.47	0.213	7	5.81	1.27	148.35	FALSE	TRUE	FALSE	20.63
119.923	31.2715	江苏省	无锡	16	1250	270	3	16.0267	1.47	0.213	7	5.81	1.27	148.354	FALSE	TRUE	FALSE	22.3
119.8	31.3	江苏省	无锡	15.7	1177	200	3	15.4	1.79	0.1733	11.8	5.6	1.28	191.413	FALSE	TRUE	FALSE	3.33
119.8	31.3	江苏省	无锡	15.7	1177	200	3	15.4	1.79	0.1733	11.8	5.6	1.28	191.413	FALSE	TRUE	FALSE	4.45
119.8	31.3	江苏省	无锡	15.7	1177	200	3	15.4	1.79	0.1733	11.8	5.6	1.28	191.413	FALSE	TRUE	FALSE	4.5
119.8	31.3	江苏省	无锡	15.7	1177	200	3	15.4	1.79	0.1733	11.8	5.6	1.28	191.413	FALSE	TRUE	FALSE	4.93
119.8	31.3	江苏省	无锡	15.7	1177	200	3	15.4	1.79	0.1733	11.8	5.6	1.28	191.413	FALSE	TRUE	FALSE	6.13
119.8	31.3	江苏省	无锡	15.7	1177	200	3	15.4	1.79	0.1733	11.8	5.6	1.28	191.413	FALSE	TRUE	FALSE	6.76
119.8	31.3	江苏省	无锡	15.7	1177	200	3	15.4	1.79	0.1733	11.8	5.6	1.28	191.413	FALSE	TRUE	FALSE	12.5
119.8	31.3	江苏省	无锡	15.7	1177	200	3	15.4	1.79	0.1733	11.8	5.6	1.28	191.413	FALSE	TRUE	FALSE	13.1
119.8	31.3	江苏省	无锡	15.7	1177	240	3	15.4	1.79	0.1733	11.8	5.6	1.28	191.413	FALSE	FALSE	TRUE	18.7
119.8	31.3	江苏省	无锡	15.7	1177	240	3	15.4	1.79	0.1733	11.8	5.6	1.28	191.413	FALSE	FALSE	TRUE	45
119.8	31.3	江苏省	无锡	15.7	1177	240	3	15.4	1.79	0.1733	11.8	5.6	1.28	191.413	FALSE	FALSE	TRUE	58.7
120.41	31.32	江苏省	苏州	14.9	1054	300	3	20.4176	2.05	0.1	6	7.4	1.41992	146.291	FALSE	TRUE	FALSE	21.15
119.82	31.36	江苏省	无锡	15	1294	189	3	12.6	0.64	0.21	11	6.2	1.41	216	FALSE	TRUE	FALSE	9.55
119.82	31.36	江苏省	无锡	15	1294	270	3	12.6	0.64	0.21	11	6.2	1.41	216.217	FALSE	TRUE	FALSE	13.23
119.82	31.36	江苏省	无锡	15	1294	0	3	12.6	0.64	0.21	11	6.2	1.41	216.217	FALSE	TRUE	FALSE	2.14
120.427	31.4279	江苏省	苏州	15	1107	0	3	15.1972	2.22	0.132	11	5.11	1.41	191.402	FALSE	FALSE	TRUE	1.63
119.332	31.4491	江苏省	常州	15	1202	300	3	15.7193	1.46	0.238	11	7.8	1.41	217.849	FALSE	TRUE	FALSE	6.78
119.332	31.4491	江苏省	常州	15	1202	300	3	15.7193	1.46	0.238	11	7.8	1.41	217.849	FALSE	TRUE	FALSE	8.5
119.332	31.4491	江苏省	常州	15	1202	300	3	15.7193	1.46	0.238	11	7.8	1.41	217.849	FALSE	TRUE	FALSE	11.09
120.417	31.45	江苏省	无锡	15.7	1100	300	3	14.1415	1.76	0.21	11	6.9	1.24	203.395	FALSE	TRUE	FALSE	15.48
120.417	31.45	江苏省	无锡	15.7	1100	300	3	13.6949	1.72	0.21	11	6.8	1.25	203.395	FALSE	TRUE	FALSE	14.13
120.417	31.45	江苏省	无锡	15.7	1100	330	3	13.7471	1.72	0.132	11	6.9	1.25	203.395	FALSE	TRUE	FALSE	13.68
120.417	31.45	江苏省	无锡	15.7	1100	0	3	13.7471	1.72	0.132	11	6.9	1.25	203.395	FALSE	TRUE	FALSE	8.52
120.085	31.49	江苏省	常州	15	1155	184.2	3	17.9814	1.71	0.21	11	5.13	1.41007	166.121	FALSE	FALSE	TRUE	41.09
120.085	31.49	江苏省	常州	15	1155	184.2	3	17.9814	1.71	0.21	11	5.13	1.41007	166.121	FALSE	FALSE	TRUE	41.4
120.085	31.49	江苏省	常州	15	1155	298.8	3	17.9814	1.71	0.21	11	5.13	1.41007	166.121	FALSE	TRUE	FALSE	13.75
120.085	31.49	江苏省	常州	15	1155	298.8	3	17.9814	1.71	0.21	11	5.13	1.41007	166.121	FALSE	TRUE	FALSE	36.82
120.085	31.49	江苏省	常州	15	1155	0	3	17.9814	1.71	0.21	11	5.13	1.41007	166.121	FALSE	TRUE	FALSE	8.83
120.085	31.49	江苏省	常州	15	1155	0	3	17.9814	1.71	0.21	11	5.13	1.41007	166.121	FALSE	TRUE	FALSE	8.98
120.085	31.49	江苏省	常州	15	1155	0	3	17.9814	1.71	0.21	11	5.13	1.41007	166.121	FALSE	FALSE	TRUE	9.72
120.085	31.49	江苏省	常州	15	1155	0	3	17.9814	1.71	0.21	11	5.13	1.41007	166.121	FALSE	FALSE	TRUE	12.33
120.085	31.49	江苏省	常州	15	1155	183	3	17.9814	1.71	0.21	11	5.13	1.41007	166.121	FALSE	FALSE	TRUE	20.6
120.085	31.49	江苏省	常州	15	1155	0	3	17.9814	1.71	0.21	11	5.13	1.41007	166.121	FALSE	FALSE	TRUE	7.51
120.084	31.4919	江苏省	常州	16.2	1121.7	180	3	8.97	1.39	0.598	11	5.7	1.41	173.67	FALSE	FALSE	TRUE	17.81
120.084	31.4919	江苏省	常州	16.2	1121.7	225	3	8.97	1.39	0.598	11	5.7	1.41	173.67	FALSE	TRUE	FALSE	7.16
120.084	31.4919	江苏省	常州	16.2	1121.7	0	3	8.97	1.39	0.598	11	5.7	1.41	173.67	FALSE	TRUE	FALSE	2.01
120.084	31.4919	江苏省	常州	16.2	1121.7	0	3	8.97	1.39	0.598	11	5.7	1.41	173.67	FALSE	FALSE	TRUE	5.43
120.1	31.5166	江苏省	常州	15.7	1177	180	3	18.56	1.88	0.21	11	6.99	1.41	187	FALSE	FALSE	TRUE	0.75
120.1	31.5166	江苏省	常州	15.7	1177	180	3	18.56	1.88	0.21	11	6.99	1.41	187	FALSE	FALSE	TRUE	2.02
120.1	31.5166	江苏省	常州	15.7	1177	180	3	18.56	1.88	0.21	11	6.99	1.41	187	FALSE	FALSE	TRUE	16.46
120.1	31.5166	江苏省	常州	15.7	1177	240	3	18.5615	1.88	0.21	11	6.99	1.41	187.09	FALSE	FALSE	TRUE	1.75
120.1	31.5166	江苏省	常州	15.7	1177	240	3	18.5615	1.88	0.21	11	6.99	1.41	187.09	FALSE	FALSE	TRUE	2.11
120.1	31.5166	江苏省	常州	15.7	1177	240	3	18.5615	1.88	0.21	11	6.99	1.41	187.09	FALSE	FALSE	TRUE	27.5
120.1	31.5166	江苏省	常州	15.7	1177	0	3	18.5615	1.88	0.21	11	6.99	1.41	187.09	FALSE	FALSE	TRUE	0.75
120.1	31.5166	江苏省	常州	15.7	1177	0	3	18.5615	1.88	0.21	11	6.99	1.41	187.09	FALSE	FALSE	TRUE	1.06
120.1	31.5166	江苏省	常州	15.7	1177	0	3	18.5615	1.88	0.21	11	6.99	1.41	187.09	FALSE	FALSE	TRUE	4.82
120.1	31.5167	江苏省	常州	15.7	1177	153	3	18.56	1.88	0.21	11	6.99	1.41	187	FALSE	TRUE	FALSE	1.56
120.1	31.5167	江苏省	常州	15.7	1177	153	3	18.56	1.88	0.21	11	6.99	1.41	187	FALSE	TRUE	FALSE	3.31
120.1	31.5167	江苏省	常州	15.7	1177	153	3	18.56	1.88	0.21	11	6.99	1.41	187	FALSE	TRUE	FALSE	7.25
120.1	31.5167	江苏省	常州	15.7	1177	270	3	18.5615	1.88	0.21	11	6.99	1.41	187.09	FALSE	TRUE	FALSE	1.84
120.1	31.5167	江苏省	常州	15.7	1177	270	3	18.5615	1.88	0.21	11	6.99	1.41	187.09	FALSE	TRUE	FALSE	4.49
120.1	31.5167	江苏省	常州	15.7	1177	270	3	18.5615	1.88	0.21	11	6.99	1.41	187.09	FALSE	TRUE	FALSE	8.75
120.1	31.5167	江苏省	常州	15.7	1177	0	3	18.5615	1.88	0.21	11	6.99	1.41	187.09	FALSE	TRUE	FALSE	1.11
120.1	31.5167	江苏省	常州	15.7	1177	0	3	18.5615	1.88	0.21	11	6.99	1.41	187.09	FALSE	TRUE	FALSE	2.02
120.1	31.5167	江苏省	常州	15.7	1177	0	3	18.5615	1.88	0.21	11	6.99	1.41	187.09	FALSE	TRUE	FALSE	4.89
120.699	31.5458	江苏省	苏州	15.5	1038	191	4	20.3016	2.09	0.44	10	7.3	1.26662	341.105	FALSE	FALSE	TRUE	15.3
120.699	31.5458	江苏省	苏州	15.5	1038	191	4	20.3016	2.09	0.44	10	7.3	1.26662	341.105	FALSE	FALSE	TRUE	22.6
120.699	31.5458	江苏省	苏州	15.5	1038	255	4	20.3016	2.09	0.44	10	7.3	1.26662	341.105	FALSE	TRUE	FALSE	1.02
120.699	31.5458	江苏省	苏州	15.5	1038	255	4	20.3016	2.09	0.44	10	7.3	1.26662	341.105	FALSE	TRUE	FALSE	6.49
120.699	31.5458	江苏省	苏州	15.5	1038	0	4	20.3016	2.09	0.44	10	7.3	1.26662	341.105	FALSE	TRUE	FALSE	1.34
120.699	31.5458	江苏省	苏州	15.5	1038	0	4	20.3016	2.09	0.44	10	7.3	1.26662	341.105	FALSE	TRUE	FALSE	4.81
120.699	31.5458	江苏省	苏州	15.5	1038	0	4	20.3016	2.09	0.44	10	7.3	1.26662	341.105	FALSE	FALSE	TRUE	5.22
120.699	31.5458	江苏省	苏州	15.5	1038	0	4	20.3016	2.09	0.44	10	7.3	1.26662	341.105	FALSE	FALSE	TRUE	6.71
120.699	31.546	江苏省	苏州	15	1089	250	4	20	1.79	0.44	20.2	7.36	1.22	341.105	FALSE	FALSE	TRUE	13.44
120.699	31.546	江苏省	苏州	15	1089	250	4	20	1.79	0.44	20.2	7.36	1.22	341.105	FALSE	FALSE	TRUE	68.93
120.699	31.546	江苏省	苏州	15	1089	300	4	20	1.79	0.44	20.2	7.36	1.22	341.105	FALSE	TRUE	FALSE	42.71
120.699	31.546	江苏省	苏州	15	1089	300	4	20	1.79	0.44	20.2	7.36	1.22	341.105	FALSE	TRUE	FALSE	44.69
120.699	31.546	江苏省	苏州	15	1089	0	4	20	1.79	0.44	20.2	7.36	1.22	341.105	FALSE	TRUE	FALSE	2.23
120.699	31.546	江苏省	苏州	15	1089	0	4	20	1.79	0.44	20.2	7.36	1.22	341.105	FALSE	FALSE	TRUE	2.28
120.699	31.546	江苏省	苏州	15	1089	0	4	20	1.79	0.44	20.2	7.36	1.22	341.105	FALSE	FALSE	TRUE	3.58
120.699	31.546	江苏省	苏州	15	1089	0	4	20	1.79	0.44	20.2	7.36	1.22	341.105	FALSE	TRUE	FALSE	4.07
120.699	31.546	江苏省	苏州	15	1089	0	4	20	1.79	0.44	20.2	7.36	1.22	341.105	FALSE	TRUE	FALSE	4.39
120.293	31.5556	江苏省	无锡	15	1100	195	9	18.94	1.558	0.21	11.6	5.6	1.36	236.471	FALSE	TRUE	FALSE	38.8
120.293	31.5556	江苏省	无锡	15	1100	0	9	18.94	1.558	0.21	11.6	5.6	1.36	236.471	FALSE	TRUE	FALSE	18.6
120.708	31.559	江苏省	苏州	15.5	1038	300	3	20.3016	2.09	0.44	17.7	7.35	1.26242	347.079	FALSE	TRUE	FALSE	2.39
120.708	31.559	江苏省	苏州	15.5	1038	0	3	20.3016	2.09	0.44	17.7	7.35	1.26242	347.079	FALSE	TRUE	FALSE	1.36
120.708	31.5591	江苏省	苏州	23.7	1097.1	240	3	12.2659	2.07779	0.44	10	4.62417	1.26242	347.079	FALSE	TRUE	FALSE	4.71
120.708	31.5591	江苏省	苏州	23.7	1049.6	440	3	23.3411	2.35	0.44	10	7.19	1.26242	347.079	FALSE	FALSE	TRUE	3.93
120.708	31.5591	江苏省	苏州	23.7	1049.6	440	3	23.3411	2.35	0.44	10	7.19	1.26242	347.079	FALSE	TRUE	FALSE	4.34
120.299	31.568	江苏省	无锡	15	1094	153	3	20.68	1.81	0.21	16	7.2	1.36	249	FALSE	TRUE	FALSE	6.8
120.299	31.568	江苏省	无锡	15	1094	210	3	20.68	1.81	0.21	16	7.2	1.36	249	FALSE	TRUE	FALSE	7.5
120.299	31.568	江苏省	无锡	15	1094	270	3	20.6787	1.81	0.21	16	7.2	1.36	249.355	FALSE	TRUE	FALSE	9.2
120.299	31.568	江苏省	无锡	15	1094	0	3	20.6787	1.81	0.21	16	7.2	1.36	249.355	FALSE	TRUE	FALSE	5.1
120.3	31.57	江苏省	无锡	14.5	950	180	3	18.56	2.88	0.21	16	6.99	1.36	249	FALSE	FALSE	TRUE	16.46
120.3	31.57	江苏省	无锡	14.5	950	180	3	18.56	2.88	0.21	16	6.99	1.36	249	FALSE	FALSE	TRUE	17.7
120.3	31.57	江苏省	无锡	14.5	950	0	3	18.5615	2.88	0.21	16	6.99	1.36	249.355	FALSE	FALSE	TRUE	4.82
119.187	31.5988	江苏省	南京	15.5	1036.9	270	3	9.64037	0.87	0.081	1	6.21	1.4	172.646	FALSE	TRUE	FALSE	4.71
119.183	31.6	江苏省	南京	15	1168	270	3	9.64037	0.87	0.081	11	6.21	1.47	172.646	FALSE	TRUE	FALSE	2.125
119.185	31.6004	江苏省	南京	15.5	1036.9	300	3	9.64037	0.87	0.2	11	6.21	1.41245	169.895	FALSE	TRUE	FALSE	14.21
120.467	31.6167	江苏省	无锡	16	1150	225	3	15	2.8	0.299	11	6.8	1.2	329.386	FALSE	FALSE	TRUE	11.77
120.467	31.6167	江苏省	无锡	16	1150	270	3	15	2.8	0.299	11	6.8	1.2	329.386	FALSE	TRUE	FALSE	18.65
120.75	31.65	江苏省	苏州	15.5	1038	255	4	20.3016	2.09	0.44	10	7.36	1.27022	341.637	FALSE	TRUE	FALSE	2.75
120.75	31.65	江苏省	苏州	15	1085	300	3	20	1.79	0.44	10	7.36	1.27022	341.637	FALSE	TRUE	FALSE	18.77
120.75	31.65	江苏省	苏州	15.5	1038	0	4	20.3016	2.09	0.44	10	7.36	1.27022	341.637	FALSE	TRUE	FALSE	1.34
120.75	31.65	江苏省	苏州	15.5	1038	0	4	20.3016	2.09	0.44	10	7.36	1.27022	341.637	FALSE	TRUE	FALSE	1.7
120.75	31.65	江苏省	苏州	15	1085	0	3	20	1.79	0.44	10	7.36	1.27022	341.637	FALSE	TRUE	FALSE	2.23
120.75	31.65	江苏省	苏州	15.5	1038	0	4	20.3016	2.09	0.44	10	7.36	1.27022	341.637	FALSE	TRUE	FALSE	4.81
119.734	31.9368	江苏省	镇江	14	1059	247	3	3.20186	1.52	0.1929	11	7.8	1.41	271.964	FALSE	TRUE	FALSE	7.47
119.296	31.9681	江苏省	镇江	15.5	1099.1	240	3	6.90255	0.85	0.04	1	5.21	1.39987	193.341	FALSE	TRUE	FALSE	11.33
119.296	31.9681	江苏省	镇江	15.5	1099.1	0	3	6.90255	0.85	0.04	1	5.21	1.39987	193.341	FALSE	TRUE	FALSE	3.17
119.3	32	江苏省	镇江	15.4	1106.5	300	3	10.6148	1.03	0.04	1	6.38	1.39932	189.303	FALSE	TRUE	FALSE	39.11
119.3	32	江苏省	镇江	15.4	1106.5	0	3	10.6148	1.03	0.04	1	6.38	1.39932	189.303	FALSE	TRUE	FALSE	1.09
119.085	32.0004	江苏省	南京	14	1074	240	3	16.87	1.95	0.3934	11	5.93	1.47	182.117	FALSE	FALSE	TRUE	10.44
119.085	32.0004	江苏省	南京	14	1074	240	3	16.87	1.95	0.3934	11	5.93	1.47	182.117	FALSE	FALSE	TRUE	10.51
118.875	32.0337	江苏省	南京	15.4	1106.5	300	3	10.6148	1.03	0.112	20	6.38	1.28	164.111	FALSE	TRUE	FALSE	39.11
118.875	32.0337	江苏省	南京	15.4	1106.5	0	3	10.6148	1.03	0.112	20	6.38	1.28	164.111	FALSE	TRUE	FALSE	1.09
118.875	32.0337	江苏省	南京	15	1058	0	3	9.8	0.949552	0.112	20	6.3	1.28	164.111	FALSE	TRUE	FALSE	5.4
118.6	32.4833	江苏省	南京	15.3	970	300	3	7.01856	0.91	0.2	11	6.4	1.38	188.608	FALSE	TRUE	FALSE	10.1599
118.6	32.4833	江苏省	南京	15.3	970	0	3	7.01856	0.91	0.2	11	6.4	1.38	188.608	FALSE	TRUE	FALSE	1.36628
118.623	32.4844	江苏省	南京	14	1054	210	3	6.96056	1.19	0.266	11	5.85	1.4	190.191	FALSE	FALSE	TRUE	18.73
118.623	32.4844	江苏省	南京	14	1054	0	3	6.96056	1.19	0.266	11	5.85	1.4	190.191	FALSE	FALSE	TRUE	6.18
120.4	32.5833	江苏省	南通	14.5	1025	270	3	14.6752	1.39	0.219	11	6.53	1.41	238.544	FALSE	TRUE	FALSE	9
120.4	32.5833	江苏省	南通	14.5	1025	270	3	14.6752	1.39	0.219	11	6.53	1.41	238.544	FALSE	TRUE	FALSE	9.5
119.862	34.0978	江苏省	盐城	13	985	330	3	10.5858	1.42	0.114	14	8.35	1.39	312.694	TRUE	FALSE	FALSE	0.39
119.862	34.0978	江苏省	盐城	13	985	0	3	10.5858	1.42	0.114	14	8.35	1.39	312.694	TRUE	FALSE	FALSE	0.26
116.844	28.2027	江西省	鹰潭	17	1674	274	3	14.6172	0.88	0.21	11	5.67	1.4092	126.611	FALSE	TRUE	FALSE	39.7
116.844	28.2027	江西省	鹰潭	17	1674	0	3	14.6172	0.88	0.21	11	5.67	1.4092	126.611	FALSE	TRUE	FALSE	29.9
115.133	28.267	江西省	宜春	16.9	1685	140	3	7.99304	1.45	0.21	11	6.87	1.41	97.7884	FALSE	TRUE	FALSE	5.35
115.133	28.267	江西省	宜春	16.9	1685	140	3	7.99304	1.45	0.21	11	6.87	1.41	97.7884	FALSE	TRUE	FALSE	19.13
115.133	28.267	江西省	宜春	16.9	1685	0	3	7.99304	1.45	0.21	11	6.87	1.41	97.7884	FALSE	TRUE	FALSE	0.95
115.133	28.267	江西省	宜春	16.9	1685	0	3	7.99304	1.45	0.21	11	6.87	1.41	97.7884	FALSE	TRUE	FALSE	4.8
114.317	28.3167	江西省	宜春	12	1711	240	3	8.46868	1	0.23	12	5.8	1.19061	31.9037	TRUE	FALSE	FALSE	6.11
114.317	28.3167	江西省	宜春	12	1711	240	3	8.46868	1	0.23	12	5.8	1.19061	31.9037	TRUE	FALSE	FALSE	6.74
114.317	28.3167	江西省	宜春	12	1711	240	3	8.46868	1	0.23	12	5.8	1.19061	31.9037	TRUE	FALSE	FALSE	9.677
120.48	28.7693	浙江省	台州	17.7	1796.8	270	3	25.7483	2.78	0.22	11	4.99	1.41	22.2516	FALSE	TRUE	FALSE	14.24
120.838	29.1478	浙江省	台州	15	1536	214	3	17.4594	1.52	0.241	11	5.92	1.41	157	FALSE	TRUE	FALSE	6.28
120.838	29.1478	浙江省	台州	15	1536	0	3	17.4594	1.52	0.241	11	5.92	1.41	157	FALSE	TRUE	FALSE	0.82
119.133	30.0833	浙江省	杭州	16	1250	243	3	7.31	0.64	0.23	12	6.23	1.31	217	FALSE	TRUE	FALSE	13.05
119.133	30.0833	浙江省	杭州	16	1250	270	3	7.30858	0.64	0.23	12	6.23	1.31	217	FALSE	TRUE	FALSE	15.3191
119.133	30.0833	浙江省	杭州	16	1250	0	3	7.30858	0.64	0.23	12	6.23	1.31	217	FALSE	TRUE	FALSE	7.37589
119.133	30.0833	浙江省	杭州	16	1250	200	3	13.2	1.45	0.366	12	5.4	1.31	196	FALSE	TRUE	FALSE	4.16
119.133	30.0833	浙江省	杭州	16	1250	200	3	13.2	1.45	0.366	12	5.4	1.31	196	FALSE	TRUE	FALSE	4.17
119.133	30.0833	浙江省	杭州	16	1250	200	3	13.2	1.45	0.366	12	5.4	1.31	196	FALSE	TRUE	FALSE	4.24
119.133	30.0833	浙江省	杭州	16	1250	200	3	13.2	1.45	0.366	12	5.4	1.31	196	FALSE	TRUE	FALSE	6.08
119.133	30.0833	浙江省	杭州	16	1250	200	3	13.2	1.45	0.366	12	5.4	1.31	196	FALSE	TRUE	FALSE	6.6
119.133	30.0833	浙江省	杭州	16	1250	200	3	13.2	1.45	0.366	12	5.4	1.31	196	FALSE	TRUE	FALSE	6.87
119.926	30.228	浙江省	杭州	15.8	1628	192.8	3	13.86	1.36	0.47	8.58	5.89	1.41	115	FALSE	TRUE	FALSE	10.39
119.926	30.228	浙江省	杭州	15.8	1628	241	3	13.8631	1.36	0.47	8.58	5.89	1.40614	115.358	FALSE	TRUE	FALSE	15.78
119.926	30.228	浙江省	杭州	15.8	1628	0	3	13.8631	1.36	0.47	8.58	5.89	1.40614	115.358	FALSE	TRUE	FALSE	3.82
119.888	30.3639	浙江省	杭州	15.8	1350	240	3	21.7401	3.46	0.149	11	5.78	1.41	133.39	FALSE	TRUE	FALSE	0.65
119.888	30.3639	浙江省	杭州	15.8	1350	240	3	21.7401	3.46	0.149	11	5.78	1.41	133.39	FALSE	TRUE	FALSE	1.15
119.888	30.3639	浙江省	杭州	15.8	1350	0	3	21.7401	3.46	0.149	11	5.78	1.41	133.39	FALSE	TRUE	FALSE	0.21
119.888	30.3639	浙江省	杭州	15.8	1350	0	3	21.7401	3.46	0.149	11	5.78	1.41	133.39	FALSE	TRUE	FALSE	0.45
119.906	30.367	浙江省	杭州	15	1446	252	3	6.19	0.2	0.21	11	4.63	1.41	136	FALSE	TRUE	FALSE	13.28
119.906	30.367	浙江省	杭州	15	1446	252	3	6.19	0.2	0.21	11	4.63	1.41	136	FALSE	TRUE	FALSE	16.18
119.906	30.367	浙江省	杭州	15	1446	280	3	6.1891	0.196	0.21	11	4.63	1.41007	136.374	FALSE	TRUE	FALSE	16.97
119.906	30.367	浙江省	杭州	15	1446	280	3	6.1891	0.196	0.21	11	4.63	1.41007	136.374	FALSE	TRUE	FALSE	17.6
119.854	30.4129	浙江省	杭州	17	1508.5	270	3	19.3155	2.07	0.246	17	4.98	1.27	119.924	FALSE	TRUE	FALSE	7.83
119.854	30.4129	浙江省	杭州	17	1508.5	0	3	19.3155	2.07	0.246	17	4.98	1.27	119.924	FALSE	TRUE	FALSE	4.91
120.3	30.42	浙江省	杭州	15.8	1350	187.5	3	22.2738	1.41	0.21	11	5.39	1.41027	203.037	FALSE	TRUE	FALSE	2.154
120.3	30.42	浙江省	杭州	15.8	1350	225	3	22.2738	1.41	0.21	11	5.39	1.41027	203.037	FALSE	TRUE	FALSE	7.839
120.412	30.44	浙江省	嘉兴	15.9	1187	210	3	7.83063	1.13	0.21	11	7.41	1.41	223.017	FALSE	TRUE	FALSE	2.35
120.412	30.44	浙江省	嘉兴	15.9	1187	0	3	7.83063	1.13	0.21	11	7.41	1.41	223.017	FALSE	TRUE	FALSE	0.87
120.283	30.4667	浙江省	杭州	15	1366	270	3	8.41067	1.17	0.04	1	6.22	1.40053	205.501	FALSE	TRUE	FALSE	22.45
120.283	30.4667	浙江省	杭州	15	1366	0	3	8.41067	1.17	0.04	1	6.22	1.40053	205.501	FALSE	TRUE	FALSE	1.34
120.533	30.6583	浙江省	嘉兴	15	1240	225	4	22.3318	2.01	0.221	23	6.64	1.28	283.37	FALSE	TRUE	FALSE	0.01734
120.014	30.6604	浙江省	湖州	15	1392	210	3	10.3828	1.87	0.21	11	7.91936	1.41433	126.472	FALSE	TRUE	FALSE	29.131
120.014	30.6604	浙江省	湖州	15	1392	0	3	10.3828	1.87	0.21	11	7.91936	1.41433	126.472	FALSE	TRUE	FALSE	8.993
119.748	30.76	浙江省	湖州	17	2003	210	4	11.59	1.2	0.21	11	4.5	1.43	103	FALSE	TRUE	FALSE	2.42
119.748	30.76	浙江省	湖州	17	2003	270	4	11.59	1.2	0.21	11	4.5	1.43	103	FALSE	TRUE	FALSE	2.74
119.748	30.76	浙江省	湖州	17	2003	300	4	11.5885	1.2	0.21	11	4.5	1.43144	102.607	FALSE	TRUE	FALSE	2.82
119.748	30.76	浙江省	湖州	15	1468	210	4	11.2	1.2	0.359	11	4.5	1.41	103	FALSE	TRUE	FALSE	2.4185
119.748	30.76	浙江省	湖州	15	1468	270	4	11.2	1.2	0.359	11	4.5	1.41	103	FALSE	TRUE	FALSE	2.7397
119.748	30.76	浙江省	湖州	15	1468	300	4	11.2	1.2	0.359	11	4.5	1.41	102.607	FALSE	TRUE	FALSE	2.8171
119.772	30.7825	浙江省	湖州	15.6	1413.2	270	9	11.2483	0.99	0.21	11	5.5	1.41266	109.131	FALSE	TRUE	FALSE	4.05
119.772	30.7825	浙江省	湖州	15.6	1413.2	300	9	11.2483	0.99	0.21	11	5.5	1.41266	109.131	FALSE	TRUE	FALSE	10.6713
119.772	30.7825	浙江省	湖州	15.6	1413.2	270	9	11.2	0.99	0.338	11	5.5	1.41	109.131	FALSE	FALSE	TRUE	4.047
119.772	30.7825	浙江省	湖州	15.6	1413.2	300	9	11.2	0.99	0.338	11	5.5	1.41	109.131	FALSE	TRUE	FALSE	10.671
121.078	30.8204	浙江省	嘉兴	16	1170	0	3	11.1369	1.37	0.221	23	6.87	1.28	343.658	FALSE	FALSE	TRUE	14.22
120.718	30.8384	浙江省	嘉兴	15	1246	180	3	7.89634	2.1704	0.39	23	8.16911	1.2802	337.321	FALSE	TRUE	FALSE	0.688
120.718	30.8384	浙江省	嘉兴	15	1246	0	3	7.89634	2.1704	0.39	23	8.16911	1.2802	337.321	FALSE	TRUE	FALSE	0.22
121.091	30.841	浙江省	嘉兴	15	1251	0	3	24.652	2.7	0.221	19.26	5.89	1.28	354.722	FALSE	TRUE	FALSE	1.01
119.938	30.9125	浙江省	湖州	15.6	1240	240	3	18.36	1.88	0.549	23	6.73	1.28	136.08	FALSE	TRUE	FALSE	5.46
119.938	30.9125	浙江省	湖州	15.6	1240	0	3	18.36	1.88	0.549	23	6.73	1.28	136.08	FALSE	TRUE	FALSE	0.91
115.617	29.9833	湖北省	黄冈	18.1	674.7	165	3	12.297	2	0.21	11	4.9	1.40975	149.661	FALSE	TRUE	FALSE	0.57
115.617	29.9833	湖北省	黄冈	18.1	674.7	0	3	12.297	2	0.21	11	4.9	1.40975	149.661	FALSE	TRUE	FALSE	0.34
115.633	29.9833	湖北省	黄冈	17.1	1456.3	165	3	12.297	2	0.154	11	4.9	1.41	151.672	FALSE	TRUE	FALSE	0.56
115.633	29.9833	湖北省	黄冈	17.1	1456.3	0	3	12.297	2	0.154	11	4.9	1.41	151.672	FALSE	TRUE	FALSE	0.34
115.6	30.1167	湖北省	黄冈	17.1	1456.3	165	3	24.478	2.2	0.17	11	6.2	1.41	147.102	FALSE	TRUE	FALSE	1.45
115.6	30.1167	湖北省	黄冈	17.1	1456.3	0	3	24.478	2.2	0.17	11	6.2	1.41	147.102	FALSE	TRUE	FALSE	0.51
115.583	30.1167	湖北省	黄冈	17.4	1488.6	0	3	23.3179	2.2	0.21	11	6.3	1.41	145.413	FALSE	TRUE	FALSE	0.51
112.529	30.2458	湖北省	荆州	16.2	1000	195	3	15.7773	1.95	0.166	11	6.48	1.41	132.836	FALSE	TRUE	FALSE	4.08
112.529	30.2458	湖北省	荆州	16.2	1000	0	3	15.7773	1.95	0.166	11	6.48	1.41	132.836	FALSE	TRUE	FALSE	1.81
112.15	30.35	湖北省	荆州	16.5	1095	150	3	10.17	2.04	0.21	16	7.4	1.39	137	FALSE	TRUE	FALSE	4.25
112.15	30.35	湖北省	荆州	16.5	1095	150	3	10.17	2.04	0.21	16	7.4	1.39	137	FALSE	TRUE	FALSE	4.3
112.15	30.35	湖北省	荆州	16.5	1095	180	3	10.1692	2.04	0.21	16	7.4	1.39018	136.594	FALSE	TRUE	FALSE	6
112.15	30.35	湖北省	荆州	16.5	1095	180	3	10.1692	2.04	0.21	16	7.4	1.39018	136.594	FALSE	TRUE	FALSE	6.07
112.15	30.35	湖北省	荆州	16	1110	180	3	12.3666	2.13	0.166	16	7.47	1.36	136.594	FALSE	TRUE	FALSE	31.65
112.15	30.35	湖北省	荆州	16	1110	0	3	12.3666	2.13	0.166	16	7.47	1.36	136.594	FALSE	TRUE	FALSE	8.73
112.146	30.3524	湖北省	荆州	16	1110	180	3	16.3863	2.13	0.21	11	7.15	1.39	136.594	FALSE	TRUE	FALSE	25.87
112.146	30.3524	湖北省	荆州	16	1110	0	3	16.3863	2.13	0.21	11	7.15	1.39	136.594	FALSE	TRUE	FALSE	8.06
110.863	32.4905	湖北省	十堰	15.2	834	180	3	9.86	0.84404	0.12	6	6.6	1.6	73	FALSE	FALSE	TRUE	0.12
110.863	32.4905	湖北省	十堰	15.2	834	180	3	9.86	0.84404	0.12	6	6.6	1.6	73	FALSE	FALSE	TRUE	0.52
110.863	32.4905	湖北省	十堰	15.2	834	180	3	9.86	0.84404	0.12	6	6.6	1.6	73	FALSE	FALSE	TRUE	0.62
111.164	32.7672	湖北省	十堰	14	844	127.5	3	6.09049	1.05	0.21	17	7.4	1.37	78	FALSE	FALSE	TRUE	0.184
111.164	32.7672	湖北省	十堰	14	844	255	3	6.09049	1.05	0.21	17	7.4	1.37	78	TRUE	FALSE	FALSE	1.582
111.164	32.7672	湖北省	十堰	14	844	0	3	6.09049	1.05	0.21	17	7.4	1.37	78	FALSE	FALSE	TRUE	0.055
111.164	32.7672	湖北省	十堰	14	844	0	3	6.09049	1.05	0.21	17	7.4	1.37	78	TRUE	FALSE	FALSE	0.792
112.933	27.9167	湖南省	湘潭	17.5	1422	120	3	17.5	1.62	0.21	11	5.1	1.31	141.949	FALSE	TRUE	FALSE	14.48
112.933	27.9167	湖南省	湘潭	17.5	1422	150	3	17.5	1.62	0.21	11	5.1	1.31	141.949	FALSE	TRUE	FALSE	10.23
112.933	27.9167	湖南省	湘潭	17.5	1340	84	3	11.99	1.97	0.21	11	5.83	1.31	142	FALSE	TRUE	FALSE	1.37
112.933	27.9167	湖南省	湘潭	17.5	1340	105	3	11.99	1.97	0.21	11	5.83	1.31	142	FALSE	TRUE	FALSE	0.58
112.933	27.9167	湖南省	湘潭	17.5	1340	120	3	11.9864	1.97138	0.21	11	5.83404	1.30515	141.949	FALSE	TRUE	FALSE	2.19
112.933	27.9167	湖南省	湘潭	17.5	1340	150	3	11.9864	1.97138	0.21	11	5.83404	1.30515	141.949	FALSE	TRUE	FALSE	0.75
112.933	27.9167	湖南省	湘潭	17.5	1340	0	3	11.9864	1.97138	0.21	11	5.83404	1.30515	141.949	FALSE	TRUE	FALSE	0.41
112.933	27.9167	湖南省	湘潭	17.5	1340	0	3	11.9864	1.97138	0.21	11	5.83404	1.30515	141.949	FALSE	TRUE	FALSE	0.89
113.36	28.12	湖南省	长沙	17.2	1300	200	3	29.6172	4.29	0.198	10	5.72	1.25	81.1757	FALSE	TRUE	FALSE	10.19
113.2	28.1383	湖南省	长沙	17.1	1500	240	3	17.4014	1.99	0.346	11	5.2	1.41	111.367	FALSE	TRUE	FALSE	7.08
113.2	28.1383	湖南省	长沙	17.1	1500	240	3	17.4014	1.99	0.346	11	5.2	1.41	111.367	FALSE	TRUE	FALSE	9.95
113.079	28.139	湖南省	长沙	15.5	1100	162	3	12.7	2.01	0.21	11	7.8	1.41	122	FALSE	TRUE	FALSE	9.31
113.079	28.139	湖南省	长沙	15.5	1100	403	3	12.703	1.03	0.21	11	7.8	1.41	122.069	FALSE	TRUE	FALSE	12.4
113.079	28.1398	湖南省	长沙	16.8	1400	330	3	21.8503	1.92	0.21	23	5.88	1.41	122.069	FALSE	TRUE	FALSE	9.95077
113.079	28.1398	湖南省	长沙	16.8	1400	0	3	21.8503	1.92	0.21	23	5.88	1.41	122.069	FALSE	TRUE	FALSE	3.74677
113.09	28.1861	湖南省	长沙	16.8	1400	0	4	13.8051	1.87	0.3642	9.96	4.92	1.41	131.807	FALSE	TRUE	FALSE	2.02
113.09	28.1861	湖南省	长沙	16.8	1400	0	4	25.6381	3.02	0.7764	14.54	7.67	1.41	131.807	FALSE	TRUE	FALSE	2.19
113.085	28.1948	湖南省	长沙	16.8	1400	150	4	25.6381	3.02	0.7764	14.54	7.67	1.41	133.458	FALSE	TRUE	FALSE	6.84
113.085	28.1948	湖南省	长沙	16.8	1400	150	4	13.8051	1.87	0.3642	9.96	4.92	1.41	133.458	FALSE	TRUE	FALSE	8.56
113.085	28.1948	湖南省	长沙	16.8	1400	0	4	13.8051	1.87	0.3642	9.96	4.92	1.41	133.458	FALSE	TRUE	FALSE	2.02
113.085	28.1948	湖南省	长沙	16.8	1400	0	4	25.6381	3.02	0.7764	14.54	7.67	1.41	133.458	FALSE	TRUE	FALSE	2.19
113.077	28.2	湖南省	长沙	16.8	1400	150	4	25.6381	3.02	0.7764	14.54	7.67	1.41	135.325	FALSE	TRUE	FALSE	6.84
113.077	28.2	湖南省	长沙	16.8	1400	150	4	13.8051	1.87	0.3642	9.96	4.92	1.41	135.325	FALSE	TRUE	FALSE	8.56
113.077	28.2	湖南省	长沙	16.8	1400	0	4	13.8051	1.87	0.3642	9.96	4.92	1.41	135.325	FALSE	TRUE	FALSE	2.02
113.077	28.2	湖南省	长沙	16.8	1400	0	4	25.6381	3.02	0.7764	14.54	7.67	1.41	135.325	FALSE	TRUE	FALSE	2.19
113.834	28.2963	湖南省	长沙	17.3	1552.3	240	3	8.45128	1.51	0.346	11	5.75	1.41	46.5036	TRUE	FALSE	FALSE	3.63
113.834	28.2963	湖南省	长沙	17.3	1552.3	0	3	8.45128	1.51	0.346	11	5.75	1.41	46.5036	TRUE	FALSE	FALSE	1.59
113.817	28.3166	湖南省	长沙	17.3	1552	240	3	8.45128	3.51	0.48	10	5.75	1.24191	48.2706	TRUE	FALSE	FALSE	5.87
113.817	28.3166	湖南省	长沙	17.3	1552	240	3	8.46868	1.2	0.48	10	5.8	1.24191	48.2706	TRUE	FALSE	FALSE	6.3
113.817	28.3166	湖南省	长沙	17	1552	240	3	8.81671	0.98	0.48	10	5.8	1.24191	48.2706	TRUE	FALSE	FALSE	12.2
113.817	28.3166	湖南省	长沙	17.3	1552	0	3	8.46868	1.2	0.48	10	5.8	1.24191	48.2706	TRUE	FALSE	FALSE	1.2
113.817	28.3166	湖南省	长沙	17	1552	0	3	8.81671	0.98	0.48	10	5.8	1.24191	48.2706	TRUE	FALSE	FALSE	1.4
113.817	28.3167	湖南省	长沙	16	1551	240	3	10.8991	1.47	0.48	10	4.64825	1.24191	48.2435	TRUE	FALSE	FALSE	10.602
113.817	28.3167	湖南省	长沙	16	1551	240	3	10.8991	1.47	0.48	10	4.64825	1.24191	48.2435	TRUE	FALSE	FALSE	14.795
113.817	28.3167	湖南省	长沙	16	1551	240	3	10.8991	1.47	0.48	10	4.64825	1.24191	48.2435	TRUE	FALSE	FALSE	17.27
113.817	28.3167	湖南省	长沙	16	1551	0	3	10.8991	1.47	0.48	10	4.64825	1.24191	48.2435	TRUE	FALSE	FALSE	3.57
113.817	28.3167	湖南省	长沙	16	1551	0	3	10.8991	1.47	0.48	10	4.64825	1.24191	48.2435	TRUE	FALSE	FALSE	3.711
113.817	28.3167	湖南省	长沙	16	1551	0	3	10.8991	1.47	0.48	10	4.64825	1.24191	48.2435	TRUE	FALSE	FALSE	7.69
113.817	28.3167	湖南省	长沙	17.5	1551.3	135	3	11.46	1.28	0.48	10	6.72	1.24	48	FALSE	TRUE	FALSE	4.12
113.817	28.3167	湖南省	长沙	17.5	1551.3	135	3	11.46	1.28	0.48	10	6.72	1.24	48	FALSE	TRUE	FALSE	5.81
113.817	28.3167	湖南省	长沙	17.5	1551.3	150	3	11.4559	1.28	0.48	10	6.72	1.24191	48.2435	FALSE	TRUE	FALSE	5.24
113.817	28.3167	湖南省	长沙	17.5	1551.3	150	3	11.4559	1.28	0.48	10	6.72	1.24191	48.2435	FALSE	TRUE	FALSE	6.34
113.817	28.3167	湖南省	长沙	17.5	1551.3	180	3	11.4559	1.28	0.48	10	6.72	1.24191	48.2435	FALSE	TRUE	FALSE	4.98
113.817	28.3167	湖南省	长沙	17.5	1551.3	180	3	11.4559	1.28	0.48	10	6.72	1.24191	48.2435	FALSE	TRUE	FALSE	6.64
113.817	28.3167	湖南省	长沙	17.5	1551	240	3	10.7135	1.42	0.48	10	4.64825	1.24191	48.2435	TRUE	FALSE	FALSE	6.32
113.817	28.3167	湖南省	长沙	16	1551	241.5	3	17.4826	1.35	0.48	10	4.61	1.24191	48.2435	TRUE	FALSE	FALSE	22.04
113.817	28.3167	湖南省	长沙	17.5	1551	0	3	10.7135	1.42	0.48	10	4.64825	1.24191	48.2435	TRUE	FALSE	FALSE	1.16
113.817	28.3167	湖南省	长沙	17.5	1551.3	0	3	11.4559	1.28	0.48	10	6.72	1.24191	48.2435	FALSE	TRUE	FALSE	1.88
113.817	28.3167	湖南省	长沙	17.5	1551.3	0	3	11.4559	1.28	0.48	10	6.72	1.24191	48.2435	FALSE	TRUE	FALSE	1.9
113.817	28.3167	湖南省	长沙	17.5	1551.3	0	3	11.4559	1.28	0.48	10	6.72	1.24191	48.2435	FALSE	TRUE	FALSE	2.15
113.817	28.3167	湖南省	长沙	17.5	1551.3	0	3	11.4559	1.28	0.48	10	6.72	1.24191	48.2435	FALSE	TRUE	FALSE	2.48
113.817	28.3167	湖南省	长沙	16	1551	0	3	17.4826	1.35	0.48	10	4.61	1.24191	48.2435	TRUE	FALSE	FALSE	15.98
113.817	28.3167	湖南省	长沙	17.5	1551.3	120	3	11.46	1.28	0.48	10	6.72	1.24	48	FALSE	TRUE	FALSE	3.92
113.817	28.3167	湖南省	长沙	17.5	1551.3	120	3	11.46	1.28	0.48	10	6.72	1.24	48	FALSE	TRUE	FALSE	5.66
113.817	28.3167	湖南省	长沙	16	1551	241.5	3	4.91299	3.42	0.48	10	5.53	1.24191	48.2435	TRUE	FALSE	FALSE	18.59
113.817	28.3167	湖南省	长沙	16	1551	0	3	4.91299	3.42	0.48	10	5.53	1.24191	48.2435	TRUE	FALSE	FALSE	5.53
113.817	28.3167	湖南省	长沙	17	1552	240	3	8.46868	1.2	0.346	10	5.8	1.25	48.2435	TRUE	FALSE	FALSE	6.3
113.817	28.3167	湖南省	长沙	16	1571	240	3	4.91299	1.42	0.346	10	5.53	1.25	48.2435	TRUE	FALSE	FALSE	14.8
113.817	28.3167	湖南省	长沙	17	1552	0	3	8.46868	1.2	0.346	10	5.8	1.25	48.2435	TRUE	FALSE	FALSE	1.2
113.817	28.3167	湖南省	长沙	16	1571	0	3	4.91299	1.42	0.346	10	5.53	1.25	48.2435	TRUE	FALSE	FALSE	3.58
113.817	28.3167	湖南省	长沙	16	1571	0	3	8.46868	1.02	0.346	10	5.53	1.25	48.2435	TRUE	FALSE	FALSE	3.58
113.817	28.3167	湖南省	长沙	16	1551	240	3	8.46868	1.02	0.48	10	5.53	1.24191	48.2706	TRUE	FALSE	FALSE	14.8
113.817	28.3167	湖南省	长沙	16	1551	0	3	8.46868	1.02	0.48	10	5.53	1.24191	48.2706	TRUE	FALSE	FALSE	3.58
113.817	28.317	湖南省	长沙	16	1551	120	3	9.64037	1.21	0.21	11	5.61	1.40061	48.2435	FALSE	TRUE	FALSE	28.45
113.817	28.317	湖南省	长沙	16	1551	0	3	9.64037	1.21	0.21	11	5.61	1.40061	48.2435	FALSE	TRUE	FALSE	6
113.827	28.3239	湖南省	长沙	16	1574	240	3	4.91299	1.42	0.346	11	5.53	1.41	48.2155	TRUE	FALSE	FALSE	7.45
113.821	28.3282	湖南省	长沙	16	1571	150	3	8.10325	3.21	0.21	11	5.7	1.40924	48.8312	FALSE	TRUE	FALSE	15.95
113.821	28.3282	湖南省	长沙	16	1571	180	3	8.10325	3.21	0.21	11	5.7	1.40924	48.8312	FALSE	TRUE	FALSE	10.03
113.821	28.3282	湖南省	长沙	16	1571	0	3	8.10325	3.21	0.21	11	5.7	1.40924	48.8312	FALSE	TRUE	FALSE	6.93
113.821	28.3282	湖南省	长沙	16	1571	0	3	8.10325	3.21	0.21	11	5.7	1.40924	48.8312	FALSE	TRUE	FALSE	8.43
113.827	28.3339	湖南省	长沙	16	1570	255	3	8.10325	1.6	0.48	10	5.7	1.2345	49.3608	FALSE	TRUE	FALSE	12.62
113.827	28.3339	湖南省	长沙	16	1570	0	3	8.10325	1.6	0.48	10	5.7	1.2345	49.3608	FALSE	TRUE	FALSE	3.18
112.496	28.507	湖南省	益阳	16.5	1465	0	3	20.7831	2.05	0.4175	11	5.16	1.41	209.051	FALSE	TRUE	FALSE	3.8
112.489	28.5132	湖南省	益阳	16.5	1432.8	150	3	20.7831	2.05	0.4175	11	5.16	1.41	208.425	FALSE	TRUE	FALSE	14.92
112.489	28.5132	湖南省	益阳	16.5	1432.8	0	3	20.7831	2.05	0.4175	11	5.16	1.41	208.425	FALSE	TRUE	FALSE	3.8
113.331	28.5511	湖南省	长沙	17.5	1330	270	3	17.5	1.62	0.346	11	5.1	1.31	92.4126	FALSE	TRUE	FALSE	19
112.871	28.7024	湖南省	岳阳	16	1362	153.75	3	24.2459	2.37	0.48	10	5.4	1.25	151.718	FALSE	TRUE	FALSE	17.61
112.871	28.7024	湖南省	岳阳	16	1362	0	3	24.2459	2.37	0.48	10	5.4	1.25	151.718	FALSE	TRUE	FALSE	3.54
112.871	28.7024	湖南省	岳阳	16	1362	123	3	24.25	2.37	0.48	10	5.4	1.25	152	FALSE	TRUE	FALSE	12.06
112.901	28.7789	湖南省	岳阳	17	1325	241.5	3	12.8422	1.3	0.21	11	5.96	1.41	141.842	TRUE	FALSE	FALSE	10.98
112.901	28.7789	湖南省	岳阳	17	1325	0	3	12.8422	1.3	0.21	11	5.96	1.41	141.842	TRUE	FALSE	FALSE	4.29
112.909	28.7851	湖南省	岳阳	17	1392.62	375	3	9.44896	0.6	0.21	11	4.87	1.41	141.583	TRUE	FALSE	FALSE	0.28
112.909	28.7851	湖南省	岳阳	17	1392.62	375	3	9.44896	0.6	0.21	11	4.87	1.41	141.583	TRUE	FALSE	FALSE	0.48
113.026	28.932	湖南省	岳阳	17	1271	502	3	12.8422	1.3	0.27	10	5.96	1.25424	124.364	TRUE	FALSE	FALSE	11.15
112.737	28.9531	湖南省	益阳	17	1400	280	3	21.0557	1.4	0.284	16	5.67	1.36	199	FALSE	TRUE	FALSE	9.58
112.737	28.9531	湖南省	益阳	17	1400	0	3	21.0557	1.4	0.284	16	5.67	1.36	199	FALSE	TRUE	FALSE	3.32
111.767	29.1917	湖南省	常德	16.7	1550	180	3	14.5998	1.97	0.27	10	6.51	1.26252	176.401	FALSE	TRUE	FALSE	11.25
111.767	29.1917	湖南省	常德	16.7	1550	180	3	14.5998	1.97	0.27	10	6.51	1.26252	176.401	FALSE	TRUE	FALSE	14.61
111.767	29.1917	湖南省	常德	16.7	1550	0	3	14.5998	1.97	0.27	10	6.51	1.26252	176.401	FALSE	TRUE	FALSE	1.93
111.767	29.1917	湖南省	常德	16.7	1550	0	3	14.5998	1.97	0.27	10	6.51	1.26252	176.401	FALSE	TRUE	FALSE	1.93
113.06	29.22	湖南省	岳阳	17	1323	330	3	16.3573	1.98	0.21	16	5.8	1.36	65.1564	FALSE	TRUE	FALSE	3.03
113.06	29.22	湖南省	岳阳	17	1323	0	3	16.3573	1.98	0.21	16	5.8	1.36	65.1564	FALSE	TRUE	FALSE	1.59
119.074	26.2198	福建省	福州	19	1456	120	3	14.0139	1.66	0.076	11	6.19	1.41	53	FALSE	TRUE	FALSE	1.98995
119.074	26.2198	福建省	福州	19	1456	120	3	14.0139	1.66	0.076	11	6.19	1.41	53	FALSE	TRUE	FALSE	2.70991
119.074	26.2198	福建省	福州	19	1456	136	3	14.0139	1.66	0.076	11	6.19	1.41	53.125	FALSE	TRUE	FALSE	2.14489
119.074	26.2198	福建省	福州	19	1456	136	3	14.0139	1.66	0.076	11	6.19	1.41	53.125	FALSE	TRUE	FALSE	2.9349
119.074	26.2198	福建省	福州	19	1456	0	3	14.0139	1.66	0.076	11	6.19	1.41	53.125	FALSE	TRUE	FALSE	1.85991
119.074	26.2198	福建省	福州	19	1456	0	3	14.0139	1.66	0.076	11	6.19	1.41	53.125	FALSE	TRUE	FALSE	2.13769
119.075	26.2206	福建省	福州	19	1455	273	3	8.21346	0.66	0.21	11	6.19	1.32985	53.125	FALSE	TRUE	FALSE	38.6
119.075	26.2206	福建省	福州	19	1455	0	3	8.21346	0.66	0.21	11	6.19	1.32985	53.125	FALSE	TRUE	FALSE	14
119.075	26.2206	福建省	福州	19	1455	240	3	8.21	0.66	0.21	11	6.19	1.33	53	FALSE	TRUE	FALSE	32.4
118.141	26.239	福建省	三明	17.7	1800	150	3	15.99	1.17	0.48	10	5.41	1.26	30	FALSE	TRUE	FALSE	0.37
118.141	26.239	福建省	三明	17.7	1800	150	3	15.99	1.17	0.48	10	5.41	1.26	30	FALSE	TRUE	FALSE	1.89
118.141	26.239	福建省	三明	17.7	1800	150	3	15.99	1.17	0.48	10	5.41	1.26	30	FALSE	TRUE	FALSE	1.93
118.141	26.239	福建省	三明	17.7	1800	180	3	15.9919	1.17	0.48	10	5.41	1.26076	30.4141	FALSE	TRUE	FALSE	0.39
118.141	26.239	福建省	三明	17.7	1800	180	3	15.9919	1.17	0.48	10	5.41	1.26076	30.4141	FALSE	TRUE	FALSE	1.72
118.141	26.239	福建省	三明	17.7	1800	180	3	15.9919	1.17	0.48	10	5.41	1.26076	30.4141	FALSE	TRUE	FALSE	2.06
117.859	27.559	福建省	南平	17.7	1800	150	3	16.12	1.57	0.48	10	4.87	1.36	33	FALSE	TRUE	FALSE	6.84
117.859	27.559	福建省	南平	17.7	1800	150	3	16.12	1.57	0.48	10	4.87	1.36	33	FALSE	TRUE	FALSE	11.18
117.859	27.559	福建省	南平	17.7	1800	150	3	16.12	1.57	0.48	10	4.87	1.36	33	FALSE	TRUE	FALSE	13.94
117.859	27.559	福建省	南平	17.7	1800	180	3	16.1195	1.57	0.48	10	4.87	1.35946	33.1984	FALSE	TRUE	FALSE	6.47
117.859	27.559	福建省	南平	17.7	1800	180	3	16.1195	1.57	0.48	10	4.87	1.35946	33.1984	FALSE	TRUE	FALSE	13.41
117.859	27.559	福建省	南平	17.7	1800	180	3	16.1195	1.57	0.48	10	4.87	1.35946	33.1984	FALSE	TRUE	FALSE	14.31
106.517	26.4333	贵州省	贵阳	14.9	1150	300	3	12.98	1.21	0.19	27	6.25	1.31	31	TRUE	FALSE	FALSE	2.99
106.517	26.4333	贵州省	贵阳	14.9	1150	300	3	12.98	1.21	0.19	27	6.25	1.31	31	TRUE	FALSE	FALSE	5.16
106.517	26.4333	贵州省	贵阳	14.9	1150	300	3	12.98	1.21	0.19	27	6.25	1.31	31	TRUE	FALSE	FALSE	5.19
106.517	26.4333	贵州省	贵阳	14.9	1150	300	3	12.98	1.21	0.19	27	6.25	1.31	31	TRUE	FALSE	FALSE	6.03
106.517	26.4333	贵州省	贵阳	14.9	1150	300	3	12.98	1.21	0.19	27	6.25	1.31	31	TRUE	FALSE	FALSE	7.43
106.517	26.4333	贵州省	贵阳	14.9	1150	345	3	12.9756	1.21	0.19	27	6.25	1.30865	30.5094	TRUE	FALSE	FALSE	3.87
106.517	26.4333	贵州省	贵阳	14.9	1150	345	3	12.9756	1.21	0.19	27	6.25	1.30865	30.5094	TRUE	FALSE	FALSE	5.78
106.517	26.4333	贵州省	贵阳	14.9	1150	345	3	12.9756	1.21	0.19	27	6.25	1.30865	30.5094	TRUE	FALSE	FALSE	6.28
106.517	26.4333	贵州省	贵阳	14.9	1150	345	3	12.9756	1.21	0.19	27	6.25	1.30865	30.5094	TRUE	FALSE	FALSE	8.1
106.517	26.4333	贵州省	贵阳	14.9	1150	345	3	12.9756	1.21	0.19	27	6.25	1.30865	30.5094	TRUE	FALSE	FALSE	10.87
121.862	41.1026	辽宁省	盘锦	8	652	187	3	12.5232	1.23	0.409	20.32	7.9	1.23	57.4319	FALSE	TRUE	FALSE	6.96
121.862	41.1026	辽宁省	盘锦	8	652	187	3	12.5232	1.23	0.409	20.32	7.9	1.23	57.4319	FALSE	TRUE	FALSE	10.86
121.862	41.1026	辽宁省	盘锦	8	652	0	3	12.5232	1.23	0.409	20.32	7.9	1.23	57.4319	FALSE	TRUE	FALSE	3.92
121.862	41.1026	辽宁省	盘锦	8	652	150	3	12.5232	1.23	0.409	20.32	7.9	1.23	57	FALSE	TRUE	FALSE	5.6
121.862	41.1026	辽宁省	盘锦	8	652	150	3	12.5232	1.23	0.409	20.32	7.9	1.23	57	FALSE	TRUE	FALSE	7.48
121.934	41.162	辽宁省	盘锦	8	651	302	3	13.86	0.57	0.25	21.42	7.9	1.25	80	FALSE	TRUE	FALSE	4.85
121.934	41.162	辽宁省	盘锦	8	651	440	3	13.8573	0.565303	0.25	21.42	7.9	1.25	79.7303	FALSE	TRUE	FALSE	5.975
121.934	41.162	辽宁省	盘锦	8	651	0	3	13.8573	0.565303	0.25	21.42	7.9	1.25	79.7303	FALSE	TRUE	FALSE	1.375
122.093	41.6839	辽宁省	锦州	8	576	180	3	8.82	1.15	0.22	13	5.72	1.48	102	TRUE	FALSE	FALSE	0.11
122.093	41.6839	辽宁省	锦州	8	576	180	3	8.82	1.15	0.22	13	5.72	1.48	102	TRUE	FALSE	FALSE	0.63
122.093	41.6839	辽宁省	锦州	8	576	240	3	8.81671	1.15	0.22	13	5.72	1.48	102	TRUE	FALSE	FALSE	0.12
122.093	41.6839	辽宁省	锦州	8	576	240	3	8.81671	1.15	0.22	13	5.72	1.48	102	TRUE	FALSE	FALSE	0.71
106.406	29.8117	重庆市	北碚	18.3	1100	413	3	11.5692	1.01	0.21	11	7.49795	1.39769	49.098	TRUE	FALSE	FALSE	22.576
106.406	29.8117	重庆市	北碚	18.3	1100	420.57	3	5.07541	0.76	0.21	11	7.49795	1.39769	49.098	TRUE	FALSE	FALSE	2.29
106.406	29.8117	重庆市	北碚	18.3	1100	420.57	3	5.07541	0.76	0.21	11	7.49795	1.39769	49.098	TRUE	FALSE	FALSE	2.91
106.406	29.8117	重庆市	北碚	18.3	1100	0	3	5.07541	0.76	0.202	11	8.16	1.41	49.098	TRUE	FALSE	FALSE	0.48
106.187	29.9356	重庆市	合川	18.1	1107.9	186.9	3	17.8654	2.78	0.4	12	7.64	1.3	63.5996	FALSE	TRUE	FALSE	2.38
106.187	29.9356	重庆市	合川	18.1	1107.9	186.9	3	17.8654	2.78	0.4	12	7.64	1.3	63.5996	FALSE	TRUE	FALSE	3.09
108.167	30.3667	重庆市	石柱	19.2	1150	450	3	4.38515	0.35	0.2	12	8.33	1.4056	18.9401	TRUE	FALSE	FALSE	2.88
108.167	30.3667	重庆市	石柱	19.2	1150	450	3	4.38515	0.35	0.2	12	8.33	1.4056	52	TRUE	FALSE	FALSE	4.04
108.167	30.3667	重庆市	石柱	19.2	1150	270	3	4.07773	0.51	0.41	12	8.27	1.3	75	TRUE	FALSE	FALSE	1.14
108.167	30.3667	重庆市	石柱	19.2	1209	270	3	4.07773	0.51	0.41	12	8.27	1.3	75	TRUE	FALSE	FALSE	2.6223
108.167	30.3667	重庆市	石柱	19.2	1150	300	3	4.07773	0.51	0.41	12	8.27	1.3	75	TRUE	FALSE	FALSE	2.17
108.167	30.3667	重庆市	石柱	19.2	1209	300	3	4.07773	0.51	0.41	12	8.27	1.3	75	TRUE	FALSE	FALSE	4.0422
108.167	30.3667	重庆市	石柱	19.2	1209	0	3	4.07773	0.51	0.41	12	8.27	1.3	75	TRUE	FALSE	FALSE	1.5557
108.167	30.3667	重庆市	石柱	19.2	1150	0	3	4.07773	0.51	0.41	12	8.27	1.3	75	TRUE	FALSE	FALSE	2.24
108.167	30.4167	重庆市	忠县	19.2	1150	270	3	7.56	0.35	0.162	12	8.33	1.34	25	TRUE	FALSE	FALSE	3.7
108.167	30.4167	重庆市	忠县	19.2	1150	450	3	7.56	0.35	0.162	12	8.33	1.34	24.8649	TRUE	FALSE	FALSE	6.25
133	45.33	黑龙江省	鸡西	3	551	179.7	3	35.4988	1.62	0.2331	17	6.92	1.26	25	FALSE	TRUE	FALSE	1.151
133	45.33	黑龙江省	鸡西	3	551	179.7	3	35.4988	1.62	0.2331	17	6.92	1.26	25	FALSE	TRUE	FALSE	1.49
133	45.33	黑龙江省	鸡西	3	551	224.55	3	35.4988	1.62	0.2331	17	6.92	1.26	25.363	FALSE	TRUE	FALSE	1.939
133	45.33	黑龙江省	鸡西	3	551	224.55	3	35.4988	1.62	0.2331	17	6.92	1.26	25.363	FALSE	TRUE	FALSE	2.263
133	45.33	黑龙江省	鸡西	3	551	0	3	35.4988	1.62	0.2331	17	6.92	1.26	25.363	FALSE	TRUE	FALSE	1.224
133	45.33	黑龙江省	鸡西	3	551	0	3	35.4988	1.62	0.2331	17	6.92	1.26	25.363	FALSE	TRUE	FALSE	1.362
128.865	45.796	黑龙江省	哈尔滨	3	500	180	3	11.4849	2.82	0.18	13	5.7	1.41	59.1186	TRUE	FALSE	FALSE	1.946
128.803	45.8228	黑龙江省	哈尔滨	2	616	165	3	14.9652	1.94	0.351	20	6.67	1.3	63	FALSE	TRUE	FALSE	15.13
128.806	45.8236	黑龙江省	哈尔滨	2	579.7	150	3	18.4223	1.58	0.23	20	6.4	1.3	56.7202	FALSE	TRUE	FALSE	2.748
128.806	45.8236	黑龙江省	哈尔滨	2	579.7	0	3	18.4223	1.58	0.23	20	6.4	1.3	56.7202	FALSE	TRUE	FALSE	0.699
128.812	45.8293	黑龙江省	哈尔滨	2	579.7	150	3	18.4223	1.58	0.23	20	6.4	1.3	57.8826	FALSE	TRUE	FALSE	2.74
128.812	45.8293	黑龙江省	哈尔滨	2	579.7	0	3	18.4223	1.58	0.23	20	6.4	1.3	57.8826	FALSE	TRUE	FALSE	0.69
126.85	45.8333	黑龙江省	哈尔滨	3	546	180	3	20.0696	1.57	0.138	20	6.88	1.3	30	TRUE	FALSE	FALSE	0.18786
126.85	45.8333	黑龙江省	哈尔滨	3	546	210	3	20.0696	1.57	0.138	20	6.88	1.3	30.4854	TRUE	FALSE	FALSE	0.19929
