# Supplementary material
Source: ML conference proceedings conference paper supplement (https://openreview.net/forum?id=2SJsV41CxV)
Supplement: supplementary_material [file LA Data.xlsx]

## Sheet: Sheet1
Longitude	Latitude	Tem	Pre	rate	SOC	Clay	pH	BD	irrigation	Yield
104.5	23	21.4433	1375.03	69	42.7	0.137	4.8	1.27	36	21912
105.5	23.5	20.2411	1115.99	54	42.7	0.137	4.8	1.27	20	21879
105.5	23.5	20.2411	1115.99	54	42.7	0.137	4.8	1.27	16	21846
119	32	15.0025	120.01	294	33.6	0.17	5.9	1.4	288	21813
119	32	15.0025	120.01	294	33.6	0.17	5.9	1.4	248	21813
119	32	15.0025	120.01	294	33.6	0.17	5.9	1.4	182	21813
119	32	15.0025	120.01	294	33.6	0.127	5.9	1.4	236	21806.4
104	23	20.837	1681.01	72	42.7	0.137	4.8	1.27	34	21753.6
104	23	20.837	1681.01	72	42.7	0.266	4.8	1.27	16	21753.6
77	38	11.6717	20.72	159	33.6	0.02	5.9	1.4	198	21747
104.5	23	21.4433	1375.03	69	42.7	0.137	4.8	1.27	32	21740.4
104.5	23	21.4433	1375.03	69	42.7	0.137	4.8	1.27	30	21727.2
119	32	15.0025	120.01	291	33.6	0.17	5.9	1.4	332	21714
119	32	15.0025	120.01	291	33.6	0.17	5.9	1.4	356	21714
119	32	15.0025	120.01	291	33.6	0.17	5.9	1.4	360	21714
119	32	15.0025	120.01	291	33.6	0.17	5.9	1.4	364	21714
104	23.5	17.8668	1216.85	39	42.7	0.137	4.8	1.27	34	21661.2
104.5	23.5	19.2501	1150.71	54	42.7	0.137	4.8	1.27	22	21648
104.5	23.5	19.2501	1150.71	54	42.7	0.137	4.8	1.27	24	21648
104.5	23.5	19.2501	1150.71	54	42.7	0.137	4.8	1.27	34	21648
104.5	23.5	19.2501	1150.71	54	42.7	0.137	4.8	1.27	36	21648
104	23.5	17.8668	1216.85	72	42.7	0.137	4.8	1.27	38	21648
104.5	23.5	19.2501	1150.71	54	42.7	0.137	4.8	1.27	18	21641.4
104.5	23.5	19.2501	1150.71	54	42.7	0.137	4.8	1.27	14	21628.2
104.5	23.5	19.2501	1150.71	54	42.7	0.137	4.8	1.27	16	21628.2
104.5	23.5	19.2501	1150.71	54	42.7	0.137	4.8	1.27	10	21588.6
104.5	23.5	19.2501	1150.71	69	42.7	0.137	4.8	1.27	36	21582
104.5	23.5	19.2501	1150.71	54	42.7	0.137	4.8	1.27	18	21568.8
77	38.5	12.7336	17.47	159	41.3	0.12	6.3	1.27	194	21549
77	38.5	12.7336	17.47	159	41.3	0.12	6.3	1.27	170	21549
76.5	39	12.8925	21.34	72	41.3	0.084	6.3	1.27	70	21542.4
104.5	30	16.8197	840.9	387	20.3	0.202	5.1	1.3	94	21450
104	23	20.837	1681.01	72	42.7	0.319	4.8	1.27	20	21390.6
104	23	20.837	1681.01	72	42.7	0.319	4.8	1.27	20	21199.2
104	23	20.837	1681.01	72	42.7	0.319	4.8	1.27	20	21186
104	23	20.837	1681.01	108	42.7	0.319	4.8	1.27	28	21146.4
101.5	22.5	20.9596	1871.59	15	42.7	0.206	4.8	1.27	16	21100.2
76	39	11.5742	24.7	99	41.3	0.12	6.3	1.27	164	21087
101.5	22.5	20.9596	1871.59	15	42.7	0.206	4.8	1.27	18	21034.2
104	23	20.837	1681.01	72	42.7	0.319	4.8	1.27	18	20988
77	38	11.6717	20.72	39	33.6	0.02	5.9	1.4	124	20922
101.5	23.5	20.9225	1270.25	39	25.2	0.147	5	1.31	14	20882.4
104	23	20.837	1681.01	108	42.7	0.319	4.8	1.27	20	20875.8
105	23.5	19.3924	1163.72	39	42.7	0.137	4.8	1.27	10	20869.2
103.5	23.5	17.2897	1217.2	45	42.7	0.308	4.8	1.27	36	20856
105	23.5	19.3924	1163.72	39	42.7	0.137	4.8	1.27	14	20809.8
103.5	23.5	17.2897	1217.2	45	25.2	0.266	5	1.31	26	20704.2
103.5	23	21.8047	1709.97	45	42.7	0.308	4.8	1.27	22	20704.2
104	23	20.837	1681.01	72	42.7	0.319	4.8	1.27	16	20625
103.5	30	13.3418	959.63	324	33.6	0.222	5.9	1.4	150	20552.4
103.5	23.5	17.2897	1217.2	45	42.7	0.319	4.8	1.27	28	20545.8
99	24.5	20.4043	1228.86	51	42.7	0.206	4.8	1.27	52	20453.4
103	22.5	22.6789	1922.15	78	42.7	0.206	4.8	1.27	14	20361
77	38	11.6717	20.72	159	33.6	0.12	5.9	1.4	202	20347.8
76	39	11.5742	24.7	99	41.3	0.184	6.3	1.27	128	20288.4
104	30	15.0266	852.12	333	33.6	0.291	5.9	1.4	164	20235.6
104	30	15.0266	852.12	333	33.6	0.291	5.9	1.4	150	20235.6
106.5	23	22.1217	1114.64	132	42.7	0.137	4.8	1.27	32	20057.4
104	31	16.9402	788.12	345	20.3	0.249	5.1	1.3	190	19905.6
104	23	20.837	1681.01	108	25.2	0.266	5	1.31	16	19872.6
104	23	20.837	1681.01	108	25.2	0.266	5	1.31	16	19833
77	38	11.6717	20.72	159	33.6	0.156	5.9	1.4	172	19819.8
77	38	11.6717	20.72	159	33.6	0.156	5.9	1.4	192	19819.8
77	38	11.6717	20.72	159	33.6	0.156	5.9	1.4	146	19819.8
77	38	11.6717	20.72	159	33.6	0.156	5.9	1.4	136	19819.8
77	38	11.6717	20.72	159	33.6	0.156	5.9	1.4	154	19819.8
104	31	16.9402	788.12	345	20.3	0.17	5.1	1.3	190	19806.6
104	30.5	16.3689	830.85	393	16.1	0.248	7.8	1.41	278	19760.4
104	30.5	16.3689	830.85	393	16.1	0.248	7.8	1.41	200	19740.6
104	30.5	16.3689	830.85	393	16.1	0.248	7.8	1.41	200	19740.6
104	30.5	16.3689	830.85	393	16.1	0.221	7.8	1.41	272	19720.8
104	23.5	17.8668	1216.85	72	42.7	0.319	4.8	1.27	28	19714.2
104	30.5	16.3689	830.85	393	16.1	0.248	7.8	1.41	204	19701
104	30.5	16.3689	830.85	393	16.1	0.248	7.8	1.41	144	19701
104	30.5	16.3689	830.85	393	16.1	0.248	7.8	1.41	146	19701
104	23.5	17.8668	1216.85	72	42.7	0.319	4.8	1.27	34	19701
125	44	5.92284	449.64	252	41.3	0.075	6.3	1.27	50	19681.2
125	44	5.92284	449.64	252	41.3	0.075	6.3	1.27	50	19681.2
125	44	5.92284	449.64	252	41.3	0.075	6.3	1.27	54	19681.2
125	44	5.92284	449.64	252	41.3	0.075	6.3	1.27	60	19661.4
125	44	5.92284	449.64	252	41.3	0.075	6.3	1.27	58	19661.4
125	44	5.92284	449.64	252	41.3	0.075	6.3	1.27	60	19661.4
104	30.5	16.3689	830.85	393	16.1	0.248	7.8	1.41	296	19661.4
104	30.5	16.3689	830.85	393	16.1	0.248	7.8	1.41	278	19661.4
104	23.5	17.8668	1216.85	72	42.7	0.319	4.8	1.27	24	19648.2
125	44	5.92284	449.64	252	41.3	0.075	6.3	1.27	44	19635
104	31	16.9402	788.12	345	20.3	0.148	5.1	1.3	128	19628.4
104	31	16.9402	788.12	345	20.3	0.17	5.1	1.3	144	19628.4
104	23.5	17.8668	1216.85	72	42.7	0.319	4.8	1.27	24	19628.4
104.5	30	16.8197	840.9	387	16.1	0.202	7.8	1.41	98	19608.6
122	42	8.84264	280	231	41.3	0.188	6.3	1.27	18	19595.4
104	31	16.9402	788.12	345	20.3	0.148	5.1	1.3	122	19582.2
125	44	5.92284	449.64	252	41.3	0.075	6.3	1.27	66	19569
104.5	30	16.8197	840.9	387	16.1	0.202	7.8	1.41	104	19569
125	44	5.92284	449.64	252	41.3	0.075	6.3	1.27	68	19555.8
125	44	5.92284	449.64	252	41.3	0.075	6.3	1.27	70	19555.8
125	44	5.92284	449.64	252	41.3	0.075	6.3	1.27	46	19555.8
125	44	5.92284	449.64	252	41.3	0.075	6.3	1.27	50	19555.8
104.5	30	16.8197	840.9	387	16.1	0.202	7.8	1.41	104	19549.2
119	29	16.661	1600.3	198	42.7	0.152	4.8	1.27	218	19536
104.5	30	16.8197	840.9	387	16.1	0.202	7.8	1.41	90	19470
104.5	30	16.8197	840.9	387	16.1	0.202	7.8	1.41	92	19430.4
76.5	39	12.8925	21.34	72	41.3	0.12	6.3	1.27	88	19423.8
76.5	39	12.8925	21.34	72	41.3	0.102	6.3	1.27	88	19423.8
76.5	39	12.8925	21.34	72	41.3	0.12	6.3	1.27	86	19423.8
77	38.5	12.7336	17.47	84	41.3	0.12	6.3	1.27	86	19417.2
77	38.5	12.7336	17.47	84	41.3	0.12	6.3	1.27	64	19417.2
104	30	15.0266	852.12	333	20.3	0.17	5.1	1.3	146	19410.6
104	31	16.9402	788.12	393	16.1	0.221	7.8	1.41	256	19377.6
104	31	16.9402	788.12	393	16.1	0.221	7.8	1.41	278	19377.6
104	31	16.9402	788.12	393	16.1	0.221	7.8	1.41	232	19377.6
103	23	20.6213	1689.94	45	14	0.303	4.9	1.43	36	19377.6
103.5	23	21.8047	1709.97	72	42.7	0.319	4.8	1.27	10	19377.6
104	31	16.9402	788.12	393	16.1	0.221	7.8	1.41	310	19338
104	31	16.9402	788.12	393	16.1	0.248	7.8	1.41	304	19338
104	31	16.9402	788.12	393	16.1	0.221	7.8	1.41	306	19324.8
126	46	4.75135	432.24	258	41.3	0.082	6.3	1.27	14	19225.8
103	23	20.6213	1689.94	45	14	0.303	4.9	1.43	34	19212.6
102.5	23	20.2953	1553.96	36	25.2	0.266	5	1.31	46	19199.4
104.5	30.5	17.0463	808.94	387	16.1	0.202	7.8	1.41	120	19153.2
104.5	30.5	17.0463	808.94	387	16.1	0.202	7.8	1.41	114	19153.2
104.5	30.5	17.0463	808.94	387	16.1	0.202	7.8	1.41	114	19133.4
104.5	30.5	17.0463	808.94	387	16.1	0.202	7.8	1.41	120	19113.6
104.5	30.5	17.0463	808.94	387	16.1	0.202	7.8	1.41	114	19113.6
103.5	23	21.8047	1709.97	45	42.7	0.319	4.8	1.27	12	19107
104.5	30	16.8197	840.9	312	20.3	0.202	5.1	1.3	88	19093.8
104.5	30.5	17.0463	808.94	387	16.1	0.202	7.8	1.41	100	19080.6
117	30.5	16.337	1391.39	213	42.7	0.264	4.8	1.27	360	19041
114.5	27.5	18.2514	1506.49	195	42.7	0.168	4.8	1.27	86	18981.6
102.5	23	20.2953	1553.96	36	17.5	0.252	4.8	1.33	12	18942
104.5	30	16.8197	840.9	312	20.3	0.17	5.1	1.3	84	18882.6
104.5	30	16.8197	840.9	387	16.1	0.168	7.8	1.41	110	18849.6
77.5	38.5	13.0739	20.25	69	41.3	0.12	6.3	1.27	168	18777
77.5	38.5	13.0739	20.25	69	41.3	0.102	6.3	1.27	138	18777
99.5	24.5	19.7602	1353.76	60	42.7	0.319	4.8	1.27	20	18724.2
110.5	35	13.8158	549.11	249	30.1	0.132	7.5	1.24	46	18651.6
107	25	19.7648	1459.18	18	42.7	0.137	4.8	1.27	10	18651.6
107	25	19.7648	1459.18	18	42.7	0.137	4.8	1.27	10	18618.6
108.5	34.5	14.7994	590.65	411	16.1	0.2545	7.8	1.41	364	18612
98.5	25	17.6535	1402.63	51	25.2	0.266	5	1.31	48	18598.8
76.5	39.5	13.104	30.73	72	41.3	0.12	6.3	1.27	112	18585.6
105.5	25.5	18.4473	1149.6	75	42.7	0.137	4.8	1.27	34	18579
75.5	39.5	12.262	32.1	117	33.6	0.168	5.9	1.4	100	18559.2
125	44	5.92284	449.64	252	41.3	0.183	6.3	1.27	56	18552.6
104	23.5	17.8668	1216.85	39	42.7	0.319	4.8	1.27	42	18546
76.5	39	12.8925	21.34	72	41.3	0.14	6.3	1.27	132	18526.2
104	23.5	17.8668	1216.85	39	42.7	0.319	4.8	1.27	44	18506.4
104	31	16.9402	788.12	393	11.9	0.221	7.2	1.36	226	18493.2
102	23.5	20.2637	1211.58	30	17.5	0.249	4.8	1.25	46	18466.8
100	23	21.1885	1329.48	27	42.7	0.309	4.8	1.27	10	18466.8
103	23.5	19.3576	1065.52	54	16.1	0.252	7.8	1.41	16	18453.6
104	23.5	17.8668	1216.85	39	42.7	0.319	4.8	1.27	30	18447
103	23	20.6213	1689.94	45	14	0.303	4.9	1.43	14	18420.6
114.5	36.5	14.519	701.75	435	11.9	0.209	6.3	1.54	366	18374.4
103	23.5	19.3576	1065.52	54	20.3	0.303	5.1	1.3	26	18374.4
126	46	4.75135	432.24	258	41.3	0.19	6.3	1.27	16	18315
101.5	22.5	20.9596	1871.59	0	42.7	0.206	4.8	1.27	30	18308.4
100.5	23.5	21.313	1348.24	30	25.2	0.2645	5	1.31	30	18295.2
101.5	25.5	17.4258	926.73	39	42.7	0.208	4.8	1.27	78	18262.2
103.5	30	13.3418	959.63	324	20.3	0.248	5.1	1.3	224	18255.6
102	23	20.6389	1646.44	51	42.7	0.319	4.8	1.27	28	18249
126	46	4.75135	432.24	258	41.3	0.19	6.3	1.27	40	18216
104.5	30	16.8197	840.9	387	10.5	0.202	8	1.37	116	18216
104.5	30	16.8197	840.9	387	10.5	0.202	8	1.37	112	18176.4
120.5	29.5	16.8056	1620.24	183	42.7	0.184	4.8	1.27	312	18176.4
114	35.5	15.329	667.49	339	30.1	0.132	7.5	1.24	68	18156.6
114	33.5	15.7093	1353.77	429	21	0.213	6.7	1.29	312	18156.6
104	31	16.9402	788.12	345	16.1	0.248	7.8	1.41	236	18156.6
102	23	20.6389	1646.44	30	42.7	0.319	4.8	1.27	24	18150
101.5	23.5	20.9225	1270.25	39	14	0.1855	5.2	1.4	16	18136.8
104.5	23.5	19.2501	1150.71	54	42.7	0.308	4.8	1.27	30	18130.2
104.5	23.5	19.2501	1150.71	54	42.7	0.308	4.8	1.27	32	18130.2
104	31	16.9402	788.12	345	16.1	0.248	7.8	1.41	202	18117
104	31	16.9402	788.12	345	16.1	0.248	7.8	1.41	210	18117
104.5	30	16.8197	840.9	387	10.5	0.202	8	1.37	112	18117
104.5	30	16.8197	840.9	387	10.5	0.202	8	1.37	106	18117
104	31	16.9402	788.12	345	16.1	0.248	7.8	1.41	224	18103.8
104	31	16.9402	788.12	345	16.1	0.221	7.8	1.41	278	18103.8
104.5	24	17.1651	1109.7	54	42.7	0.137	4.8	1.27	34	18077.4
104.5	24	17.1651	1109.7	54	42.7	0.137	4.8	1.27	32	18077.4
104	31	16.9402	788.12	345	16.1	0.221	7.8	1.41	284	18064.2
103	23	20.6213	1689.94	78	17.5	0.252	4.8	1.33	12	18064.2
104	31	16.9402	788.12	345	16.1	0.248	7.8	1.41	230	18044.4
104	31	16.9402	788.12	345	16.1	0.221	7.8	1.41	302	18044.4
114.5	27.5	18.2514	1506.49	195	42.7	0.248	4.8	1.27	82	18044.4
99	25	18.2679	1246	66	25.2	0.208	5	1.31	44	18044.4
104	31	16.9402	788.12	345	16.1	0.248	7.8	1.41	212	18004.8
104	31	16.9402	788.12	345	16.1	0.248	7.8	1.41	236	18004.8
104	30.5	16.3689	830.85	333	16.1	0.248	7.8	1.41	154	18004.8
103	23.5	19.3576	1065.52	54	20.3	0.308	5.1	1.3	20	18004.8
103.5	23	21.8047	1709.97	45	25.2	0.281	5	1.31	24	17991.6
104.5	30	16.8197	840.9	387	10.5	0.202	8	1.37	94	17978.4
104.5	24	17.1651	1109.7	54	42.7	0.137	4.8	1.27	28	17978.4
102	23	20.6389	1646.44	30	42.7	0.319	4.8	1.27	28	17965.2
104.5	24	17.1651	1109.7	54	42.7	0.137	4.8	1.27	30	17952
104.5	24	17.1651	1109.7	54	42.7	0.137	4.8	1.27	28	17952
104.5	24	17.1651	1109.7	54	42.7	0.137	4.8	1.27	28	17952
104.5	24	17.1651	1109.7	54	42.7	0.137	4.8	1.27	26	17952
103	23.5	19.3576	1065.52	54	14	0.303	4.9	1.43	22	17938.8
103.5	23.5	17.2897	1217.2	45	25.2	0.303	5	1.31	24	17938.8
121.5	41	9.75867	472.51	144	41.3	0.046	6.3	1.27	70	17932.2
104	31	16.9402	788.12	345	16.1	0.248	7.8	1.41	210	17925.6
103	23.5	19.3576	1065.52	54	14	0.303	4.9	1.43	28	17919
121.5	41	9.75867	472.51	144	41.3	0.046	6.3	1.27	140	17912.4
104	31	16.9402	788.12	345	16.1	0.148	4.9	1.19	112	17905.8
104	31	16.9402	788.12	345	16.1	0.221	7.8	1.41	254	17905.8
103.5	23.5	17.2897	1217.2	45	25.2	0.303	5	1.31	24	17905.8
104.5	23.5	19.2501	1150.71	54	42.7	0.308	4.8	1.27	28	17905.8
104.5	29.5	17.6058	826.59	312	16.1	0.202	4.9	1.19	102	17899.2
104.5	30	16.8197	840.9	387	10.5	0.202	8	1.37	94	17892.6
103	23	20.6213	1689.94	45	19.6	0.303	6.6	1.34	38	17892.6
104	31	16.9402	788.12	345	16.1	0.221	7.8	1.41	318	17886
103	23.5	19.3576	1065.52	54	14	0.303	4.9	1.43	30	17886
106.5	23	22.1217	1114.64	78	42.7	0.137	4.8	1.27	22	17886
124	43.5	7.1203	507.25	195	41.3	0.035	6.3	1.27	26	17879.4
103	23.5	19.3576	1065.52	54	14	0.303	4.9	1.43	22	17872.8
103	23.5	19.3576	1065.52	54	14	0.303	4.9	1.43	30	17872.8
104	31	16.9402	788.12	345	16.1	0.221	7.8	1.41	310	17866.2
104	31	16.9402	788.12	345	16.1	0.248	7.8	1.41	266	17866.2
103.5	23.5	17.2897	1217.2	45	25.2	0.303	5	1.31	24	17839.8
104.5	29.5	17.6058	826.59	312	16.1	0.148	4.9	1.19	80	17820
106.5	23	22.1217	1114.64	78	42.7	0.137	4.8	1.27	26	17813.4
104	31	16.9402	788.12	345	16.1	0.221	7.8	1.41	196	17806.8
104	31	16.9402	788.12	345	16.1	0.221	7.8	1.41	214	17806.8
104	31	16.9402	788.12	345	16.1	0.221	7.8	1.41	220	17806.8
101.5	23.5	20.9225	1270.25	39	25.2	0.313	5	1.31	12	17806.8
114.5	38.5	14.2776	503.01	411	23.1	0.213	6.6	1.28	184	17800.2
104.5	29.5	17.6058	826.59	312	16.1	0.148	4.9	1.19	80	17800.2
104.5	29.5	17.6058	826.59	312	16.1	0.148	4.9	1.19	80	17800.2
104.5	24.5	17.887	1067.57	81	42.7	0.137	4.8	1.27	10	17793.6
124.5	44	6.29594	454.55	195	41.3	0.075	6.3	1.27	22	17773.8
104	31	16.9402	788.12	345	16.1	0.221	7.8	1.41	190	17773.8
104	31	16.9402	788.12	345	16.1	0.221	7.8	1.41	224	17754
104	31	16.9402	788.12	345	16.1	0.221	7.8	1.41	232	17754
104	30	15.0266	852.12	333	16.1	0.248	7.8	1.41	212	17754
104	30	15.0266	852.12	333	16.1	0.248	7.8	1.41	212	17754
104.5	29.5	17.6058	826.59	312	16.1	0.148	4.9	1.19	78	17754
104	31	16.9402	788.12	345	16.1	0.221	7.8	1.41	216	17734.2
104	31	16.9402	788.12	345	16.1	0.248	7.8	1.41	202	17734.2
104	30.5	16.3689	830.85	393	16.1	0.122	7.8	1.41	222	17734.2
107.5	25.5	17.9965	1625.89	57	42.7	0.137	4.8	1.27	36	17734.2
124.5	44	6.29594	454.55	195	41.3	0.075	6.3	1.27	20	17727.6
124.5	44	6.29594	454.55	198	41.3	0.075	6.3	1.27	32	17727.6
103.5	30	13.3418	959.63	324	20.3	0.17	5.1	1.3	210	17727.6
104.5	29.5	17.6058	826.59	312	16.1	0.148	4.9	1.19	68	17727.6
104.5	29.5	17.6058	826.59	312	16.1	0.148	4.9	1.19	72	17727.6
104	31	16.9402	788.12	345	16.1	0.248	7.8	1.41	176	17714.4
105	24	17.63	1133.2	39	42.7	0.137	4.8	1.27	10	17714.4
82.5	41.5	12.3641	43.24	48	33.6	0.04	5.9	1.4	180	17701.2
124.5	44	6.29594	454.55	195	41.3	0.075	6.3	1.27	22	17701.2
124.5	44	6.29594	454.55	195	41.3	0.075	6.3	1.27	22	17701.2
104.5	29.5	17.6058	826.59	312	16.1	0.148	4.9	1.19	94	17701.2
104	31	16.9402	788.12	345	16.1	0.221	7.8	1.41	144	17694.6
104	31	16.9402	788.12	345	16.1	0.221	7.8	1.41	150	17694.6
104	30.5	16.3689	830.85	393	16.1	0.122	7.8	1.41	280	17694.6
124.5	44	6.29594	454.55	195	41.3	0.075	6.3	1.27	20	17688
124.5	44	6.29594	454.55	195	41.3	0.075	6.3	1.27	24	17688
124.5	44	6.29594	454.55	198	41.3	0.075	6.3	1.27	36	17681.4
104.5	29.5	17.6058	826.59	312	16.1	0.148	4.9	1.19	72	17681.4
104.5	29.5	17.6058	826.59	312	16.1	0.148	4.9	1.19	76	17681.4
104.5	29.5	17.6058	826.59	312	16.1	0.148	4.9	1.19	82	17681.4
104	31	16.9402	788.12	345	16.1	0.248	7.8	1.41	124	17674.8
104	31	16.9402	788.12	345	16.1	0.221	7.8	1.41	160	17674.8
124.5	44	6.29594	454.55	195	41.3	0.075	6.3	1.27	40	17668.2
124.5	44	6.29594	454.55	195	41.3	0.075	6.3	1.27	38	17668.2
124.5	44	6.29594	454.55	195	41.3	0.075	6.3	1.27	26	17668.2
124.5	44	6.29594	454.55	195	41.3	0.075	6.3	1.27	40	17668.2
102	22.5	22.0077	1789.3	51	42.7	0.319	4.8	1.27	28	17668.2
104	30.5	16.3689	830.85	393	16.1	0.122	7.8	1.41	278	17661.6
104	30.5	16.3689	830.85	393	16.1	0.122	7.8	1.41	252	17661.6
124.5	44	6.29594	454.55	195	41.3	0.075	6.3	1.27	38	17655
124.5	44	6.29594	454.55	195	41.3	0.075	6.3	1.27	28	17655
124.5	44	6.29594	454.55	195	41.3	0.075	6.3	1.27	26	17655
104	31	16.9402	788.12	345	16.1	0.221	7.8	1.41	118	17635.2
77.5	39	13.0221	23.94	69	41.3	0.12	6.3	1.27	128	17628.6
104	30.5	16.3689	830.85	393	16.1	0.122	7.8	1.41	238	17628.6
104.5	29.5	17.6058	826.59	312	16.1	0.148	4.9	1.19	90	17628.6
104	30.5	16.3689	830.85	393	16.1	0.122	7.8	1.41	274	17608.8
104	30.5	16.3689	830.85	393	16.1	0.122	7.8	1.41	194	17608.8
104.5	29.5	17.6058	826.59	312	16.1	0.157	4.9	1.19	108	17608.8
106	23	22.3517	1277.85	60	42.7	0.14	4.8	1.27	26	17595.6
104.5	30.5	17.0463	808.94	387	10.5	0.202	8	1.37	110	17556
107.5	24.5	20.1731	1499.11	66	42.7	0.137	4.8	1.27	30	17529.6
104.5	30.5	17.0463	808.94	387	10.5	0.202	8	1.37	102	17509.8
104.5	24.5	17.887	1067.57	81	42.7	0.137	4.8	1.27	18	17503.2
104.5	30	16.8197	840.9	387	16.1	0.129	7.8	1.41	114	17490
120.5	29.5	16.8056	1620.24	183	42.7	0.214	4.8	1.27	342	17483.4
124.5	45	5.09131	394.3	183	41.3	0.071	6.3	1.27	164	17457
107.5	24.5	20.1731	1499.11	66	42.7	0.137	4.8	1.27	32	17450.4
114	33	15.8287	1399.98	429	21	0.213	6.7	1.29	346	17443.8
103.5	30	13.3418	959.63	222	33.6	0.196	5.9	1.4	150	17443.8
103.5	30	13.3418	959.63	222	33.6	0.196	5.9	1.4	148	17443.8
114.5	27	18.568	1420.38	195	33.6	0.164	5.9	1.4	146	17430.6
112	33	16.4062	1145.3	378	14	0.261	6.6	1.37	136	17410.8
104.5	30.5	17.0463	808.94	387	10.5	0.202	8	1.37	98	17410.8
111.5	32.5	16.3772	1001.27	300	20.3	0.23	5.1	1.3	88	17404.2
103.5	24	17.4867	988.59	45	42.7	0.206	4.8	1.27	12	17404.2
112	33	16.4062	1145.3	378	14	0.261	6.6	1.37	158	17391
103.5	30	13.3418	959.63	222	33.6	0.196	5.9	1.4	150	17384.4
105.5	25	18.8621	1139.47	54	42.7	0.137	4.8	1.27	12	17384.4
103	23.5	19.3576	1065.52	45	17.5	0.309	4.8	1.25	32	17371.2
77	39.5	13.0208	34.39	15	41.3	0.084	6.3	1.27	12	17344.8
77.5	39	13.0221	23.94	63	41.3	0.12	6.3	1.27	104	17338.2
77.5	39	13.0221	23.94	63	41.3	0.12	6.3	1.27	114	17338.2
77.5	39	13.0221	23.94	63	41.3	0.12	6.3	1.27	140	17338.2
77.5	39	13.0221	23.94	63	41.3	0.12	6.3	1.27	144	17338.2
77.5	39	13.0221	23.94	63	41.3	0.12	6.3	1.27	130	17338.2
77.5	39	13.0221	23.94	63	41.3	0.12	6.3	1.27	138	17338.2
77.5	39	13.0221	23.94	63	41.3	0.12	6.3	1.27	132	17338.2
125	44	5.92284	449.64	252	41.3	0.208	6.3	1.27	42	17305.2
104	31	16.9402	788.12	345	16.1	0.17	7.8	1.41	184	17285.4
125	44	5.92284	449.64	180	41.3	0.075	6.3	1.27	46	17272.2
109	34.5	13.4924	666.54	336	16.1	0.245	7.8	1.41	142	17272.2
104.5	30	16.8197	840.9	387	10.5	0.17	8	1.37	106	17265.6
109	34.5	13.4924	666.54	336	16.1	0.196	7.8	1.41	262	17259
99	24.5	20.4043	1228.86	51	25.2	0.266	5	1.31	50	17259
109	34.5	13.4924	666.54	336	16.1	0.217	7.8	1.41	106	17252.4
109	34.5	13.4924	666.54	336	16.1	0.217	7.8	1.41	132	17239.2
109	34.5	13.4924	666.54	336	16.1	0.217	7.8	1.41	156	17239.2
103.5	30	13.3418	959.63	222	33.6	0.196	5.9	1.4	146	17239.2
109	34.5	13.4924	666.54	336	16.1	0.196	7.8	1.41	242	17232.6
109	34.5	13.4924	666.54	336	16.1	0.217	7.8	1.41	94	17232.6
109	34.5	13.4924	666.54	336	16.1	0.217	7.8	1.41	118	17232.6
109	34.5	13.4924	666.54	336	16.1	0.245	7.8	1.41	296	17232.6
104.5	29.5	17.6058	826.59	312	16.1	0.202	7.8	1.41	84	17232.6
125	44	5.92284	449.64	180	41.3	0.075	6.3	1.27	44	17226
109	34.5	13.4924	666.54	336	16.1	0.217	7.8	1.41	82	17219.4
109	34.5	13.4924	666.54	336	16.1	0.245	7.8	1.41	314	17219.4
109	34.5	13.4924	666.54	336	16.1	0.245	7.8	1.41	320	17219.4
109	34.5	13.4924	666.54	336	16.1	0.217	7.8	1.41	326	17219.4
109	34.5	13.4924	666.54	336	16.1	0.217	7.8	1.41	336	17219.4
104	24	17.1502	1066.96	39	42.7	0.137	4.8	1.27	52	17212.8
109	34.5	13.4924	666.54	336	16.1	0.245	7.8	1.41	252	17206.2
109	34.5	13.4924	666.54	336	16.1	0.196	7.8	1.41	258	17206.2
109	34.5	13.4924	666.54	336	16.1	0.196	7.8	1.41	284	17206.2
109	34.5	13.4924	666.54	336	16.1	0.196	7.8	1.41	310	17206.2
109	34.5	13.4924	666.54	336	16.1	0.217	7.8	1.41	334	17206.2
109	34.5	13.4924	666.54	336	16.1	0.217	7.8	1.41	150	17199.6
109	34.5	13.4924	666.54	336	16.1	0.217	7.8	1.41	366	17199.6
105.5	25	18.8621	1139.47	54	42.7	0.137	4.8	1.27	26	17199.6
104.5	29.5	17.6058	826.59	312	16.1	0.202	7.8	1.41	102	17193
109	34.5	13.4924	666.54	336	16.1	0.217	7.8	1.41	206	17186.4
109	34.5	13.4924	666.54	336	16.1	0.196	7.8	1.41	302	17186.4
109	34.5	13.4924	666.54	336	16.1	0.245	7.8	1.41	292	17186.4
109	34.5	13.4924	666.54	336	16.1	0.245	7.8	1.41	316	17179.8
102.5	23	20.2953	1553.96	36	14	0.203	5.2	1.4	34	17179.8
109	34.5	13.4924	666.54	336	16.1	0.245	7.8	1.41	272	17166.6
109	34.5	13.4924	666.54	336	16.1	0.245	7.8	1.41	288	17166.6
104.5	30.5	17.0463	808.94	387	16.1	0.129	7.8	1.41	132	17166.6
109	34.5	13.4924	666.54	336	16.1	0.245	7.8	1.41	344	17160
104	31	16.9402	788.12	345	16.1	0.18	7.8	1.41	140	17153.4
104.5	29.5	17.6058	826.59	312	16.1	0.202	7.8	1.41	84	17153.4
109	34.5	13.4924	666.54	336	16.1	0.217	7.8	1.41	190	17146.8
109	34.5	13.4924	666.54	336	16.1	0.217	7.8	1.41	196	17146.8
109	34.5	13.4924	666.54	336	16.1	0.217	7.8	1.41	198	17146.8
109	34.5	13.4924	666.54	336	16.1	0.245	7.8	1.41	316	17146.8
104.5	30	16.8197	840.9	387	10.5	0.17	8	1.37	96	17146.8
109	34.5	13.4924	666.54	339	16.1	0.245	7.8	1.41	366	17140.2
107.5	24.5	20.1731	1499.11	66	42.7	0.137	4.8	1.27	16	17133.6
109	34.5	13.4924	666.54	336	16.1	0.245	7.8	1.41	342	17127
109	34.5	13.4924	666.54	336	16.1	0.245	7.8	1.41	352	17127
104.5	30	16.8197	840.9	387	10.5	0.168	8	1.37	104	17127
109	34.5	13.4924	666.54	336	14	0.189	6.4	1.41	22	17120.4
109	34.5	13.4924	666.54	336	16.1	0.217	7.8	1.41	170	17113.8
109	34.5	13.4924	666.54	336	16.1	0.245	7.8	1.41	336	17113.8
104	24	17.1502	1066.96	42	42.7	0.137	4.8	1.27	36	17113.8
109	34.5	13.4924	666.54	339	16.1	0.245	7.8	1.41	364	17100.6
109	34.5	13.4924	666.54	339	16.1	0.245	7.8	1.41	360	17094
104.5	30.5	17.0463	808.94	387	16.1	0.129	7.8	1.41	128	17094
104	24	17.1502	1066.96	39	42.7	0.137	4.8	1.27	20	17094
82.5	41	12.4232	39.89	69	41.3	0.12	6.3	1.27	180	17087.4
104.5	29.5	17.6058	826.59	312	16.1	0.202	7.8	1.41	88	17087.4
105	24.5	18.7806	1134.75	39	42.7	0.137	4.8	1.27	26	17087.4
105	24.5	18.7806	1134.75	39	42.7	0.137	4.8	1.27	26	17087.4
104.5	30	16.8197	840.9	387	10.5	0.17	8	1.37	94	17080.8
77	38	11.6717	20.72	39	41.3	0.12	6.3	1.27	112	17067.6
125	44.5	5.70634	425.42	252	41.3	0.208	6.3	1.27	44	17067.6
109	34.5	13.4924	666.54	336	14	0.142	6.4	1.41	38	17067.6
103.5	29.5	12.2262	913.82	222	33.6	0.196	5.9	1.4	142	17067.6
104.5	30.5	17.0463	808.94	387	16.1	0.129	7.8	1.41	114	17061
105	24.5	18.7806	1134.75	39	42.7	0.137	4.8	1.27	26	17061
105	24.5	18.7806	1134.75	39	42.7	0.137	4.8	1.27	16	17061
109	35	13.698	575.9	336	14	0.142	6.4	1.41	148	17047.8
109	34.5	13.4924	666.54	336	14	0.142	6.4	1.41	18	17047.8
104.5	30.5	17.0463	808.94	387	16.1	0.129	7.8	1.41	114	17047.8
103.5	29.5	12.2262	913.82	222	33.6	0.196	5.9	1.4	144	17041.2
105	24.5	18.7806	1134.75	39	42.7	0.137	4.8	1.27	16	17041.2
103	23.5	19.3576	1065.52	45	14	0.303	4.9	1.43	26	17041.2
109	34.5	13.4924	666.54	336	14	0.142	6.4	1.41	64	17034.6
104	24	17.1502	1066.96	42	42.7	0.137	4.8	1.27	12	17034.6
109	35	13.698	575.9	336	14	0.142	6.4	1.41	142	17014.8
103	23.5	19.3576	1065.52	45	14	0.303	4.9	1.43	24	16995
103.5	29.5	12.2262	913.82	222	33.6	0.196	5.9	1.4	146	16988.4
103.5	29.5	12.2262	913.82	222	33.6	0.196	5.9	1.4	144	16988.4
103.5	30.5	16.136	945.65	324	16.1	0.221	7.8	1.41	248	16981.8
104	24	17.1502	1066.96	39	42.7	0.137	4.8	1.27	36	16975.2
103.5	30.5	16.136	945.65	324	16.1	0.248	7.8	1.41	244	16955.4
101.5	23	19.7717	1802.27	42	20.3	0.452	5.1	1.3	12	16955.4
120	29.5	17.6039	1462.37	174	42.7	0.246	4.8	1.27	212	16948.8
120.5	28	19.8812	1698.16	327	42.7	0.375	4.8	1.27	176	16948.8
117.5	34.5	15.4961	981.3	351	30.1	0.1445	7.5	1.24	28	16942.2
104.5	30	16.8197	840.9	387	10.5	0.17	8	1.37	84	16942.2
103.5	30.5	16.136	945.65	324	16.1	0.248	7.8	1.41	246	16935.6
108	26	18.2057	1457.33	27	42.7	0.137	4.8	1.27	32	16929
115.5	28.5	18.3698	1431.18	267	33.6	0.137	5.9	1.4	202	16915.8
115.5	28.5	18.3698	1431.18	267	33.6	0.092	5.9	1.4	208	16915.8
103.5	30.5	16.136	945.65	324	16.1	0.248	7.8	1.41	240	16909.2
104	30	15.0266	852.12	333	16.1	0.168	7.8	1.41	104	16909.2
102.5	23	20.2953	1553.96	36	14	0.188	5.2	1.4	34	16909.2
109	34.5	13.4924	666.54	336	16.1	0.164	7.8	1.41	230	16896
104.5	30.5	17.0463	808.94	387	16.1	0.129	7.8	1.41	96	16889.4
104	30	15.0266	852.12	333	15.4	0.129	4.8	1.21	182	16889.4
99.5	26	14.0723	1212.26	24	20.3	0.16	5.1	1.3	24	16889.4
103.5	30.5	16.136	945.65	324	16.1	0.248	7.8	1.41	250	16882.8
124	44.5	5.76848	426.45	159	41.3	0.071	6.3	1.27	12	16876.2
104	31	16.9402	788.12	345	11.9	0.221	7.2	1.36	188	16869.6
105	24.5	18.7806	1134.75	39	42.7	0.137	4.8	1.27	30	16869.6
102.5	23	20.2953	1553.96	36	14	0.188	5.2	1.4	38	16869.6
109	34.5	13.4924	666.54	336	16.1	0.164	7.8	1.41	252	16863
103.5	30.5	16.136	945.65	324	16.1	0.221	7.8	1.41	236	16863
115	26.5	19.1693	1547.02	96	42.7	0.248	4.8	1.27	100	16863
104	31	16.9402	788.12	345	11.9	0.221	7.2	1.36	186	16843.2
103.5	30	13.3418	959.63	324	20.3	0.17	5.1	1.3	150	16843.2
114	33	15.8287	1399.98	429	14.7	0.24	6.9	1.56	166	16836.6
103.5	30.5	16.136	945.65	324	16.1	0.248	7.8	1.41	230	16836.6
103.5	30.5	16.136	945.65	324	16.1	0.248	7.8	1.41	224	16836.6
105	30	17.6672	872.26	336	16.1	0.202	7.8	1.41	120	16836.6
114	33	15.8287	1399.98	429	14.7	0.24	6.9	1.56	164	16816.8
103.5	30.5	16.136	945.65	324	16.1	0.248	7.8	1.41	220	16816.8
103.5	30.5	16.136	945.65	324	16.1	0.221	7.8	1.41	214	16816.8
104	31.5	16.8772	805.44	345	16.1	0.157	4.9	1.19	80	16810.2
104	31.5	16.8772	805.44	345	16.1	0.157	4.9	1.19	90	16810.2
105	30	17.6672	872.26	336	16.1	0.202	7.8	1.41	114	16810.2
105	24	17.63	1133.2	9	42.7	0.137	4.8	1.27	16	16803.6
104.5	24	17.1651	1109.7	27	42.7	0.137	4.8	1.27	32	16803.6
109	34.5	13.4924	666.54	336	16.1	0.164	7.8	1.41	308	16797
114	33	15.8287	1399.98	429	14.7	0.24	6.9	1.56	204	16797
103.5	30.5	16.136	945.65	315	16.1	0.248	7.8	1.41	254	16797
99.5	26.5	11.7853	1124.71	15	42.7	0.162	4.8	1.27	36	16797
111	27.5	16.7956	1363.13	195	25.2	0.197	5	1.31	120	16797
111	27.5	16.7956	1363.13	195	25.2	0.197	5	1.31	148	16757.4
103.5	30	13.3418	959.63	324	14.7	0.221	6.2	1.355	212	16750.8
79.5	37	9.2997	22.14	66	33.6	0.077	5.9	1.4	92	16744.2
79.5	37	9.2997	22.14	66	33.6	0.077	5.9	1.4	90	16744.2
79.5	37	9.2997	22.14	66	33.6	0.077	5.9	1.4	90	16744.2
79.5	37	9.2997	22.14	66	33.6	0.077	5.9	1.4	72	16744.2
79.5	37	9.2997	22.14	66	33.6	0.077	5.9	1.4	74	16744.2
116	30	14.6535	1644.87	186	42.7	0.264	4.8	1.27	194	16731
101.5	23.5	20.9225	1270.25	39	17.5	0.309	4.8	1.25	16	16731
105	30	17.6672	872.26	336	16.1	0.202	7.8	1.41	98	16724.4
116	30	14.6535	1644.87	186	42.7	0.116	4.8	1.27	238	16717.8
105	24	17.63	1133.2	9	42.7	0.137	4.8	1.27	12	16717.8
104	31.5	16.8772	805.44	345	16.1	0.248	7.8	1.41	98	16711.2
99	24.5	20.4043	1228.86	51	25.2	0.266	5	1.31	56	16711.2
101.5	23.5	20.9225	1270.25	39	17.5	0.309	4.8	1.25	16	16711.2
114.5	33	15.9995	1295.27	468	21	0.187	6.7	1.29	232	16698
104.5	29.5	17.6058	826.59	312	16.1	0.148	7.8	1.41	76	16691.4
102.5	23	20.2953	1553.96	36	16.1	0.203	4.9	1.19	36	16684.8
109.5	35	13.3733	609.49	318	14	0.217	6.4	1.41	114	16678.2
103.5	30.5	16.136	945.65	315	16.1	0.221	7.8	1.41	252	16678.2
105	30	17.6672	872.26	336	16.1	0.202	7.8	1.41	78	16678.2
105	30	17.6672	872.26	336	16.1	0.202	7.8	1.41	74	16678.2
104	31.5	16.8772	805.44	345	16.1	0.248	7.8	1.41	76	16658.4
103.5	30.5	16.136	945.65	315	16.1	0.248	7.8	1.41	244	16651.8
103.5	30.5	16.136	945.65	315	16.1	0.221	7.8	1.41	250	16651.8
109.5	35	13.3733	609.49	318	14	0.217	6.4	1.41	126	16638.6
105	30	17.6672	872.26	336	16.1	0.202	7.8	1.41	88	16632
105	24.5	18.7806	1134.75	9	42.7	0.137	4.8	1.27	10	16632
105	24.5	18.7806	1134.75	9	42.7	0.137	4.8	1.27	14	16632
103.5	30.5	16.136	945.65	315	16.1	0.221	7.8	1.41	240	16625.4
103.5	30.5	16.136	945.65	315	16.1	0.248	7.8	1.41	242	16625.4
104.5	24	17.1651	1109.7	27	42.7	0.137	4.8	1.27	24	16625.4
116	30	14.6535	1644.87	186	42.7	0.264	4.8	1.27	188	16618.8
119	29	16.661	1600.3	198	33.6	0.152	5.9	1.4	324	16618.8
119	29	16.661	1600.3	198	33.6	0.152	5.9	1.4	362	16599
109	27.5	16.1114	1308.55	72	42.7	0.2	4.8	1.27	50	16592.4
106	25	18.6452	1199.65	12	42.7	0.137	4.8	1.27	10	16585.8
109.5	35	13.3733	609.49	318	14	0.196	6.4	1.41	116	16579.2
103.5	31	17.1586	904	315	16.1	0.169	7.8	1.41	232	16579.2
103.5	30.5	16.136	945.65	315	16.1	0.222	7.8	1.41	242	16579.2
103.5	30.5	16.136	945.65	315	16.1	0.221	7.8	1.41	228	16579.2
103.5	30.5	16.136	945.65	315	16.1	0.221	7.8	1.41	202	16579.2
119	29	16.661	1600.3	198	33.6	0.152	5.9	1.4	240	16579.2
120.5	28	19.8812	1698.16	108	42.7	0.149	4.8	1.27	146	16572.6
103.5	29.5	12.2262	913.82	222	33.6	0.196	5.9	1.4	146	16566
107	24.5	20.4344	1276.21	45	42.7	0.137	4.8	1.27	12	16566
103	23	20.6213	1689.94	45	17.5	0.36	4.8	1.25	26	16559.4
120	30.5	17.5642	1267.23	360	33.6	0.274	5.9	1.4	362	16552.8
105.5	24.5	20.1383	1097.91	24	42.7	0.137	4.8	1.27	14	16539.6
105.5	24.5	20.1383	1097.91	24	42.7	0.137	4.8	1.27	12	16539.6
119	32.5	16.4267	1014.05	294	33.6	0.17	5.9	1.4	328	16533
119	32.5	16.4267	1014.05	294	33.6	0.17	5.9	1.4	330	16533
119	32.5	16.4267	1014.05	294	33.6	0.17	5.9	1.4	316	16533
119	32.5	16.4267	1014.05	294	33.6	0.17	5.9	1.4	312	16533
119	32.5	16.4267	1014.05	294	33.6	0.17	5.9	1.4	304	16533
104.5	29.5	17.6058	826.59	312	16.1	0.148	7.8	1.41	80	16533
103.5	30.5	16.136	945.65	315	16.1	0.221	7.8	1.41	186	16506.6
102	23	20.6389	1646.44	30	16.1	0.203	4.9	1.19	20	16506.6
107.5	27.5	15.5639	1252.27	156	20.3	0.219	5.1	1.3	44	15840
105	30	17.6672	872.26	336	10.5	0.202	8	1.37	76	15496.8
105	30	17.6672	872.26	336	10.5	0.202	8	1.37	84	15496.8
105	30	17.6672	872.26	336	10.5	0.202	8	1.37	82	15430.8
115	33.5	15.7779	1242.26	468	14	0.183	8	1.41	298	15411
112	28	15.5633	1573.88	210	25.2	0.197	5	1.31	202	15602.4
112	28	15.5633	1573.88	210	25.2	0.197	5	1.31	138	15543
124.5	44	6.29594	454.55	195	41.3	0.183	6.3	1.27	26	16262.4
125	44.5	5.70634	425.42	225	41.3	0.208	6.3	1.27	32	15972
126	44.5	4.95825	508.11	237	41.3	0.182	6.3	1.27	46	15800.4
125	44	5.92284	449.64	180	41.3	0.156	6.3	1.27	42	15774
126	44.5	4.95825	508.11	237	41.3	0.182	6.3	1.27	26	15721.2
126	44.5	4.95825	508.11	237	41.3	0.182	6.3	1.27	26	15721.2
125.5	44.5	5.40626	449.41	237	41.3	0.208	6.3	1.27	48	15411
102	23.5	20.2637	1211.58	30	14	0.303	4.9	1.43	40	15774
102	23.5	20.2637	1211.58	30	14	0.303	4.9	1.43	36	15734.4
102	23.5	20.2637	1211.58	30	14	0.303	4.9	1.43	10	15675
115.5	28.5	18.3698	1431.18	267	25.2	0.2245	5	1.31	230	15536.4
104.5	29	18.2227	844.05	237	20.3	0.17	5.1	1.3	128	15470.4
104.5	29	18.2227	844.05	237	20.3	0.17	5.1	1.3	112	15470.4
104.5	29	18.2227	844.05	237	20.3	0.17	5.1	1.3	106	15450.6
104.5	29	18.2227	844.05	237	20.3	0.202	5.1	1.3	120	15450.6
104.5	29	18.2227	844.05	237	20.3	0.202	5.1	1.3	114	15411
118.5	30.5	11.6757	1515.69	162	42.7	0.266	4.8	1.27	238	15589.2
115.5	37	13.8443	587.07	390	18.2	0.187	7	1.31	300	16328.4
108	34.5	14.6032	603.19	327	16.1	0.2545	7.8	1.41	190	16486.8
108	34.5	14.6032	603.19	327	16.1	0.2545	7.8	1.41	118	16374.6
108	34.5	14.6032	603.19	327	16.1	0.2545	7.8	1.41	190	16368
109	34.5	13.4924	666.54	336	16.1	0.138	7.8	1.41	186	15503.4
109	34.5	13.4924	666.54	336	5.6	0.196	8.3	1.4	184	15503.4
109	34.5	13.4924	666.54	336	5.6	0.196	8.3	1.4	194	15483.6
109	34.5	13.4924	666.54	336	8.4	0.217	8	1.39	170	15470.4
109	34.5	13.4924	666.54	336	5.6	0.217	8.3	1.4	68	15424.2
104.5	24	17.1651	1109.7	27	42.7	0.137	4.8	1.27	22	16493.4
109.5	35	13.3733	609.49	318	14	0.147	6.4	1.41	102	16420.8
109.5	35	13.3733	609.49	318	14	0.142	6.4	1.41	106	16407.6
109.5	35	13.3733	609.49	318	14	0.142	6.4	1.41	120	16407.6
109.5	35	13.3733	609.49	318	14	0.142	6.4	1.41	110	16381.2
109.5	35	13.3733	609.49	318	14	0.142	6.4	1.41	110	16262.4
109.5	35	13.3733	609.49	318	16.1	0.147	7.8	1.41	112	16189.8
109.5	35	13.3733	609.49	318	16.1	0.142	7.8	1.41	122	16176.6
109.5	35	13.3733	609.49	318	16.1	0.142	7.8	1.41	136	16077.6
126	45	4.90795	484.82	237	41.3	0.182	6.3	1.27	60	16420.8
126	45	4.90795	484.82	237	41.3	0.182	6.3	1.27	60	16394.4
124.5	45	5.09131	394.3	150	41.3	0.071	6.3	1.27	150	16216.2
124.5	45	5.09131	394.3	183	41.3	0.173	6.3	1.27	134	16011.6
124.5	45	5.09131	394.3	183	41.3	0.173	6.3	1.27	132	16011.6
124.5	45	5.09131	394.3	183	41.3	0.184	6.3	1.27	126	16011.6
124.5	44.5	5.74493	425.82	183	41.3	0.159	6.3	1.27	104	15978.6
124	44	6.66139	449.94	159	41.3	0.075	6.3	1.27	16	16064.4
124	44	6.66139	449.94	159	41.3	0.075	6.3	1.27	20	16064.4
124	44	6.66139	449.94	159	41.3	0.075	6.3	1.27	20	16044.6
124	44	6.66139	449.94	159	41.3	0.075	6.3	1.27	18	16031.4
124	44	6.66139	449.94	159	41.3	0.075	6.3	1.27	18	16031.4
124	44	6.66139	449.94	159	41.3	0.075	6.3	1.27	20	15991.8
124	44	6.66139	449.94	159	41.3	0.075	6.3	1.27	20	15978.6
124	44	6.66139	449.94	159	41.3	0.075	6.3	1.27	22	15978.6
123.5	44	6.98189	410.95	135	41.3	0.075	6.3	1.27	16	15668.4
123.5	44	6.98189	410.95	135	41.3	0.071	6.3	1.27	14	15661.8
123.5	44	6.98189	410.95	135	41.3	0.075	6.3	1.27	14	15648.6
123.5	44	6.98189	410.95	135	41.3	0.075	6.3	1.27	14	15648.6
123.5	44	6.98189	410.95	135	41.3	0.075	6.3	1.27	14	15622.2
123.5	44	6.98189	410.95	135	41.3	0.075	6.3	1.27	24	15569.4
111	27	16.6021	1376.62	195	25.2	0.197	5	1.31	120	16427.4
110.5	26.5	14.8953	1638.15	159	25.2	0.197	5	1.31	132	15430.8
110.5	26.5	14.8953	1638.15	159	25.2	0.197	5	1.31	128	15430.8
110.5	26.5	14.8953	1638.15	159	25.2	0.197	5	1.31	122	15430.8
111.5	27.5	16.2657	1463.65	168	25.2	0.197	5	1.31	112	15417.6
100.5	24	21.2751	1362.67	33	42.7	0.321	4.8	1.27	20	16057.8
101	24	21.2307	1138.97	33	42.7	0.319	4.8	1.27	20	15741
102	23	20.6389	1646.44	30	14	0.303	4.9	1.43	22	15642
122	41	9.74567	514.26	150	41.3	0.113	6.3	1.27	154	15760.8
99.5	26.5	11.7853	1124.71	15	42.7	0.208	4.8	1.27	38	15760.8
104.5	30	16.8197	840.9	387	10.5	0.129	8	1.37	120	15589.2
104.5	30	16.8197	840.9	387	10.5	0.129	8	1.37	118	15589.2
104.5	30	16.8197	840.9	387	10.5	0.129	8	1.37	122	15589.2
104.5	30	16.8197	840.9	387	10.5	0.129	8	1.37	120	15569.4
104.5	30	16.8197	840.9	387	20.3	0.449	5.1	1.3	90	15569.4
104.5	30	16.8197	840.9	387	20.3	0.449	5.1	1.3	92	15569.4
104.5	30	16.8197	840.9	387	10.5	0.129	8	1.37	118	15549.6
104.5	30	16.8197	840.9	387	10.5	0.129	8	1.37	118	15529.8
104.5	30	16.8197	840.9	387	10.5	0.129	8	1.37	118	15529.8
104.5	30	16.8197	840.9	387	10.5	0.129	8	1.37	114	15490.2
104.5	30	16.8197	840.9	387	10.5	0.129	8	1.37	110	15450.6
112	32.5	16.7532	1050	378	11.9	0.244	7.2	1.36	238	15879.6
103.5	30	13.3418	959.63	324	16.1	0.248	7.8	1.41	240	16486.8
103.5	30	13.3418	959.63	324	16.1	0.249	7.8	1.41	150	16420.8
103.5	30	13.3418	959.63	324	16.1	0.248	7.8	1.41	232	16381.2
103.5	30	13.3418	959.63	324	16.1	0.248	7.8	1.41	198	16335
119.5	28.5	18.1866	1494.74	81	42.7	0.152	4.8	1.27	156	16196.4
119.5	28.5	18.1866	1494.74	81	42.7	0.152	4.8	1.27	156	16170
103.5	29.5	12.2262	913.82	222	33.6	0.196	5.9	1.4	142	16328.4
104	29.5	15.8156	826.73	255	16.1	0.148	4.9	1.19	82	16196.4
104	29.5	15.8156	826.73	255	16.1	0.268	7.8	1.41	132	15642
103.5	29.5	12.2262	913.82	222	33.6	0.129	5.9	1.4	148	15562.8
77.5	38.5	13.0739	20.25	15	41.3	0.102	6.3	1.27	150	15747.6
76.5	38.5	10.632	18.49	9	41.3	0.12	6.3	1.27	18	15543
122	41.5	9.39205	330.51	150	41.3	0.173	6.3	1.27	46	16302
121.5	41	9.75867	472.51	144	41.3	0.113	6.3	1.27	140	15635.4
121.5	41	9.75867	472.51	144	41.3	0.113	6.3	1.27	138	15615.6
121.5	41	9.75867	472.51	144	41.3	0.113	6.3	1.27	120	15615.6
120	29	17.5166	1513.24	138	42.7	0.253	4.8	1.27	132	15952.2
119.5	29	17.6154	1456.94	159	33.6	0.239	5.9	1.4	202	15595.8
119.5	29	17.6154	1456.94	159	33.6	0.152	5.9	1.4	200	15417.6
119.5	29	17.6154	1456.94	159	33.6	0.152	5.9	1.4	200	15417.6
116.5	35.5	14.4793	606.08	378	21	0.198	6.7	1.29	352	16170
102.5	23	20.2953	1553.96	36	42.7	0.206	4.8	1.27	16	22110
102.5	23.5	20.4904	1055.1	42	14	0.303	4.9	1.43	26	15906
102.5	23.5	20.4904	1055.1	36	14	0.303	4.9	1.43	30	15906
103.5	23.5	17.2897	1217.2	45	42.7	0.44	4.8	1.27	32	15906
103.5	23.5	17.2897	1217.2	45	42.7	0.44	4.8	1.27	30	15886.2
103	23	20.6213	1689.94	45	16.1	0.304	4.9	1.19	20	15807
103.5	23.5	17.2897	1217.2	45	42.7	0.44	4.8	1.27	28	15774
102.5	23.5	20.4904	1055.1	36	17.5	0.309	4.8	1.25	32	15767.4
102.5	23.5	20.4904	1055.1	42	20.3	0.303	5.1	1.3	44	15470.4
107	24.5	20.4344	1276.21	39	42.7	0.137	4.8	1.27	10	16354.8
107	24.5	20.4344	1276.21	45	42.7	0.137	4.8	1.27	14	16354.8
115.5	26.5	19.5172	1603.72	48	42.7	0.157	4.8	1.27	68	16427.4
115.5	26	20.2499	1625.87	69	42.7	0.248	4.8	1.27	30	16394.4
119	26	20.014	1553.51	108	25.2	0.114	5	1.31	80	15833.4
107	29.5	15.0341	1177.62	336	20.3	0.267	5.1	1.3	84	16084.2
107	29.5	15.0341	1177.62	336	20.3	0.202	5.1	1.3	72	16011.6
107	29.5	15.0341	1177.62	336	20.3	0.162	5.1	1.3	72	15523.2
107	29.5	15.0341	1177.62	336	20.3	0.162	5.1	1.3	76	15510
107	29.5	15.0341	1177.62	336	20.3	0.162	5.1	1.3	80	15510
107	29.5	15.0341	1177.62	336	20.3	0.162	5.1	1.3	74	15490.2
99.5	26	14.0723	1212.26	24	16.1	0.236	7.8	1.41	36	16024.8
99.5	26	14.0723	1212.26	33	16.1	0.236	7.8	1.41	32	15998.4
100	26	14.2764	1167.37	30	42.7	0.319	4.8	1.27	16	15813.6
99.5	26	14.0723	1212.26	33	14	0.236	6.6	1.31	36	15668.4
99.5	26	14.0723	1212.26	33	14	0.236	6.6	1.31	28	15503.4
99.5	25.5	16.7525	1210.36	24	20.3	0.16	5.1	1.3	18	15424.2
117.5	32.5	16.6143	983.53	255	33.6	0.112	5.9	1.4	246	16018.2
117.5	32.5	16.6143	983.53	255	33.6	0.263	5.9	1.4	240	15701.4
117.5	32.5	16.6143	983.53	255	33.6	0.263	5.9	1.4	234	15701.4
117.5	32.5	16.6143	983.53	255	33.6	0.262	5.9	1.4	294	15701.4
117.5	30.5	12.6857	1621.47	150	42.7	0.264	4.8	1.27	362	15813.6
117.5	30.5	12.6857	1621.47	150	42.7	0.264	4.8	1.27	364	15813.6
103.5	30.5	16.136	945.65	315	16.1	0.221	7.8	1.41	178	16486.8
103.5	30.5	16.136	945.65	315	16.1	0.167	7.8	1.41	272	16420.8
103.5	30.5	16.136	945.65	315	16.1	0.221	7.8	1.41	194	16414.2
103.5	30.5	16.136	945.65	315	16.1	0.222	7.8	1.41	228	16288.8
103.5	30.5	16.136	945.65	315	16.1	0.222	7.8	1.41	236	16288.8
104	30.5	16.3689	830.85	393	10.5	0.129	8	1.37	166	15602.4
104	30.5	16.3689	830.85	393	10.5	0.129	8	1.37	188	15582.6
104	30.5	16.3689	830.85	393	10.5	0.129	8	1.37	204	15562.8
104	30.5	16.3689	830.85	393	10.5	0.129	8	1.37	176	15543
99.5	25	17.8621	1361.09	27	20.3	0.16	5.1	1.3	32	16440.6
99	25	18.2679	1246	51	25.2	0.188	5	1.31	58	16341.6
99	25.5	16.061	1205.05	21	42.7	0.319	4.8	1.27	16	15958.8
107	24	21.5559	1066.25	45	42.7	0.137	4.8	1.27	10	15437.4
114	36	14.491	747.29	327	16.1	0.25	7.8	1.41	336	16282.2
114	36	14.491	747.29	327	14	0.209	8	1.41	350	15582.6
102.5	23.5	20.4904	1055.1	42	14	0.203	6.6	1.31	62	15391.2
109	34.5	13.4924	666.54	339	8.4	0.217	8	1.39	360	15384.6
105	30	17.6672	872.26	336	10.5	0.202	8	1.37	124	15384.6
105	30	17.6672	872.26	336	10.5	0.202	8	1.37	78	15384.6
111.5	32.5	16.3772	1001.27	300	14	0.23	6.3	1.28	166	15378
104	30	15.0266	852.12	333	10.5	0.168	8	1.37	122	15378
112	27.5	14.8092	1680.67	234	17.5	0.205	4.8	1.25	180	15378
112	27.5	14.8092	1680.67	234	17.5	0.205	4.8	1.25	180	15378
103	23	20.6213	1689.94	45	16.1	0.304	4.9	1.19	16	15378
103	23.5	19.3576	1065.52	54	17.5	0.364	4.8	1.33	28	15371.4
102.5	23.5	20.4904	1055.1	42	14	0.303	4.9	1.43	34	15371.4
105	30	17.6672	872.26	336	10.5	0.243	8	1.37	122	15364.8
105	30	17.6672	872.26	336	10.5	0.243	8	1.37	124	15364.8
125	44.5	5.70634	425.42	225	30.1	0.035	6.9	1.355	30	15351.6
125	44.5	5.70634	425.42	225	30.1	0.035	6.9	1.355	30	15351.6
103.5	30	13.3418	959.63	324	16.1	0.168	7.8	1.41	248	15351.6
104.5	30	16.8197	840.9	387	10.5	0.129	8	1.37	100	15351.6
104.5	30	16.8197	840.9	387	10.5	0.129	8	1.37	100	15351.6
104	30	15.0266	852.12	333	10.5	0.168	8	1.37	106	15351.6
103.5	23	21.8047	1709.97	45	14	0.303	4.9	1.43	20	15351.6
105	30	17.6672	872.26	336	10.5	0.202	8	1.37	76	15338.4
105	30	17.6672	872.26	336	10.5	0.202	8	1.37	74	15338.4
104	30	15.0266	852.12	333	10.5	0.168	8	1.37	96	15331.8
108.5	34.5	14.7994	590.65	411	16.1	0.04	7.8	1.41	282	15298.8
106	23	22.3517	1277.85	0	42.7	0.137	4.8	1.27	28	15298.8
114.5	27	18.568	1420.38	129	33.6	0.164	5.9	1.4	158	15292.2
122	41	9.74567	514.26	150	41.3	0.14	6.3	1.27	98	15285.6
104	30	15.0266	852.12	333	16.1	0.105	7.8	1.41	158	15285.6
115	25.5	19.9774	1578.31	48	42.7	0.248	4.8	1.27	40	15285.6
115	25.5	19.9774	1578.31	48	42.7	0.248	4.8	1.27	42	15285.6
126	45	4.90795	484.82	237	41.3	0.208	6.3	1.27	50	15279
119	31.5	16.8119	1071.92	231	33.6	0.237	5.9	1.4	364	15259.2
115.5	37	13.8443	587.07	357	18.2	0.157	7	1.31	184	15252.6
115.5	37	13.8443	587.07	357	18.2	0.157	7	1.31	180	15252.6
125	44	5.92284	449.64	252	27.3	0.075	6.4	1.3	56	15246
112	27.5	14.8092	1680.67	234	17.5	0.205	4.8	1.25	178	15239.4
112	27.5	14.8092	1680.67	234	17.5	0.205	4.8	1.25	180	15239.4
119	31.5	16.8119	1071.92	231	33.6	0.237	5.9	1.4	350	15232.8
100.5	25.5	16.6049	1012.01	60	14	0.19	6.6	1.37	38	15232.8
103.5	23	21.8047	1709.97	45	14	0.303	4.9	1.43	20	15226.2
122	41	9.74567	514.26	150	41.3	0.184	6.3	1.27	142	15219.6
108.5	34.5	14.7994	590.65	282	16.1	0.217	7.8	1.41	364	15213
114.5	33	15.9995	1295.27	468	16.1	0.213	7.5	1.23	212	15213
100.5	25.5	16.6049	1012.01	60	14	0.19	6.6	1.37	38	15213
112	27	16.2865	1546.48	243	17.5	0.253	4.8	1.25	180	15206.4
100.5	26	16.0862	1015.09	60	25.2	0.19	5	1.31	18	15206.4
109	34	10.4874	830.77	339	16.1	0.217	7.8	1.41	236	15199.8
114.5	33.5	15.7626	1264.19	474	8.4	0.187	8	1.39	290	15199.8
114.5	33.5	15.7626	1264.19	474	8.4	0.187	8	1.39	226	15199.8
100	26	14.2764	1167.37	30	42.7	0.319	4.8	1.27	34	15199.8
108.5	34.5	14.7994	590.65	282	14	0.142	6.4	1.41	332	15193.2
119	31.5	16.8119	1071.92	231	33.6	0.237	5.9	1.4	366	15193.2
114.5	33	15.9995	1295.27	468	14	0.213	8	1.41	166	15186.6
115	25.5	19.9774	1578.31	48	42.7	0.248	4.8	1.27	36	15186.6
114.5	33.5	15.7626	1264.19	474	8.4	0.187	8	1.39	300	15180
114.5	33	15.9995	1295.27	468	14	0.213	8	1.41	168	15180
108.5	34.5	14.7994	590.65	282	16.1	0.217	7.8	1.41	336	15173.4
111.5	32.5	16.3772	1001.27	300	5.6	0.23	6.5	1.43	134	15173.4
111.5	32.5	16.3772	1001.27	300	5.6	0.23	6.5	1.43	132	15173.4
111.5	32.5	16.3772	1001.27	300	5.6	0.23	6.5	1.43	140	15173.4
100.5	25.5	16.6049	1012.01	54	20.3	0.211	5.1	1.3	52	15166.8
109	34	10.4874	830.77	339	16.1	0.217	7.8	1.41	254	15153.6
114.5	33.5	15.7626	1264.19	468	5.6	0.183	8.3	1.4	296	15153.6
105	30	17.6672	872.26	336	10.5	0.202	8	1.37	102	15153.6
104.5	29.5	17.6058	826.59	237	16.8	0.148	6.3	1.37	94	15147
108.5	34.5	14.7994	590.65	282	16.1	0.217	7.8	1.41	314	15140.4
109	34	10.4874	830.77	339	16.1	0.217	7.8	1.41	268	15140.4
104.5	30	16.8197	840.9	387	8.4	0.133	8	1.39	126	15140.4
115.5	28.5	18.3698	1431.18	372	16.1	0.209	7.8	1.41	186	15140.4
115.5	28.5	18.3698	1431.18	372	16.1	0.209	7.8	1.41	190	15140.4
117	28	17.8163	2006.71	162	33.6	0.164	5.9	1.4	214	15140.4
117	28	17.8163	2006.71	162	33.6	0.164	5.9	1.4	220	15140.4
108.5	34.5	14.7994	590.65	282	14	0.217	6.4	1.41	312	15133.8
108.5	34.5	14.7994	590.65	282	16.1	0.217	7.8	1.41	308	15127.2
111.5	32.5	16.3772	1001.27	300	5.6	0.23	6.5	1.43	154	15127.2
105	29.5	18.1229	878.56	213	20.3	0.211	5.1	1.3	132	15127.2
115	26.5	19.1693	1547.02	99	33.6	0.164	5.9	1.4	144	15127.2
123	42	8.61997	437.7	198	35.7	0.14	7.8	1.36	40	15120.6
116.5	36	13.5042	586.62	378	11.9	0.153	6.3	1.54	122	15120.6
108.5	34.5	14.7994	590.65	282	14	0.142	6.4	1.41	344	15120.6
108.5	34.5	14.7994	590.65	282	14	0.142	6.4	1.41	330	15120.6
108.5	34.5	14.7994	590.65	282	16.1	0.2545	7.8	1.41	310	15120.6
123	42	8.61997	437.7	198	35.7	0.14	7.8	1.36	38	15114
123	42	8.61997	437.7	198	35.7	0.14	7.8	1.36	40	15114
123	42	8.61997	437.7	198	35.7	0.14	7.8	1.36	46	15114
123	42	8.61997	437.7	198	35.7	0.14	7.8	1.36	46	15114
123	42	8.61997	437.7	198	35.7	0.14	7.8	1.36	42	15114
114.5	37	14.6453	726.36	366	9.1	0.244	8	1.41	320	15114
116	32.5	16.6124	1080.78	402	21	0.239	6.7	1.29	26	15114
104	31	16.9402	788.12	345	11.9	0.129	7.2	1.36	180	15114
103.5	30.5	16.136	945.65	324	16.1	0.122	7.8	1.41	254	15114
108.5	34.5	14.7994	590.65	282	16.1	0.196	7.8	1.41	350	15107.4
108.5	34.5	14.7994	590.65	282	14	0.142	6.4	1.41	290	15107.4
125	44	5.92284	449.64	252	34.3	0.208	7.2	1.23	42	15100.8
109	34	10.4874	830.77	339	8.4	0.2145	8	1.39	314	15100.8
114	33	15.8287	1399.98	429	8.4	0.213	6.8	1.27	130	15100.8
116	32.5	16.6124	1080.78	402	21	0.159	6.7	1.29	254	15100.8
108.5	34.5	14.7994	590.65	282	14	0.142	6.4	1.41	240	15094.2
108.5	34.5	14.7994	590.65	282	14	0.142	6.4	1.41	308	15094.2
108.5	34.5	14.7994	590.65	282	16.1	0.196	7.8	1.41	334	15094.2
114.5	33.5	15.7626	1264.19	468	8.4	0.187	8	1.39	254	15094.2
108.5	34.5	14.7994	590.65	282	14	0.196	6.4	1.41	280	15087.6
112.5	34.5	14.7132	793.7	288	11.9	0.223	6.3	1.54	352	15074.4
114.5	33.5	15.7626	1264.19	468	8.4	0.187	8	1.39	238	15074.4
114.5	33.5	15.7626	1264.19	468	8.4	0.187	8	1.39	208	15074.4
114.5	33.5	15.7626	1264.19	468	8.4	0.187	8	1.39	224	15074.4
108.5	34.5	14.7994	590.65	282	14	0.142	6.4	1.41	192	15061.2
111.5	32.5	16.3772	1001.27	300	14	0.244	8	1.41	194	15061.2
111.5	32.5	16.3772	1001.27	300	14	0.244	8	1.41	198	15061.2
115.5	26.5	19.5172	1603.72	48	42.7	0.248	4.8	1.27	64	15061.2
109	34	10.4874	830.77	339	8.4	0.196	8	1.39	330	15054.6
103.5	30.5	16.136	945.65	324	16.1	0.122	7.8	1.41	254	15054.6
108.5	34.5	14.7994	590.65	282	14	0.142	6.4	1.41	240	15048
104.5	29.5	17.6058	826.59	237	16.1	0.148	4.9	1.19	102	15048
111.5	28.5	15.9627	1480.38	261	17.5	0.236	4.8	1.25	360	15041.4
116	32.5	16.6124	1080.78	402	21	0.239	6.7	1.29	216	15034.8
108.5	34.5	14.7994	590.65	282	14	0.217	6.4	1.41	244	15021.6
116	32.5	16.6124	1080.78	402	21	0.239	6.7	1.29	250	15021.6
112	30.5	17.5152	1104.38	300	20.3	0.211	5.1	1.3	148	15021.6
108.5	34.5	14.7994	590.65	282	16.1	0.142	7.8	1.41	258	15015
114	36	14.491	747.29	339	8.4	0.244	6.5	1.44	282	15008.4
114	33	15.8287	1399.98	429	8.4	0.213	6.8	1.27	146	15008.4
116	33	16.1157	1209.94	402	21	0.239	6.7	1.29	90	15008.4
112.5	29	17.5684	1342.91	228	32.2	0.198	6.1	1.22	266	15008.4
117	28	17.8163	2006.71	162	33.6	0.164	5.9	1.4	176	15008.4
104.5	30.5	17.0463	808.94	318	16.1	0.129	7.8	1.41	134	14988.6
108.5	34.5	14.7994	590.65	282	14	0.142	6.4	1.41	174	14982
108.5	34.5	14.7994	590.65	282	16.1	0.142	7.8	1.41	252	14982
114	33	15.8287	1399.98	429	8.4	0.213	6.8	1.27	224	14975.4
116	33	16.1157	1209.94	402	19.6	0.239	5.1	1.27	88	14975.4
104.5	30.5	17.0463	808.94	387	10.5	0.129	8	1.37	140	14975.4
104.5	30.5	17.0463	808.94	387	10.5	0.129	8	1.37	136	14975.4
103.5	30.5	16.136	945.65	315	16.1	0.122	7.8	1.41	260	14968.8
104.5	30.5	17.0463	808.94	387	10.5	0.129	8	1.37	126	14962.2
104.5	30.5	17.0463	808.94	387	10.5	0.129	8	1.37	124	14962.2
109	34.5	13.4924	666.54	336	9.1	0.164	8	1.41	178	14955.6
101.5	23	19.7717	1802.27	42	14	0.563	4.9	1.43	10	14955.6
109	34.5	13.4924	666.54	336	9.1	0.189	8	1.41	142	14949
111.5	27.5	16.2657	1463.65	195	17.5	0.259	4.8	1.25	182	14949
123	47	4.76253	276.03	162	41.3	0.226	6.3	1.27	18	14935.8
108.5	34.5	14.7994	590.65	282	14	0.142	6.4	1.41	32	14935.8
109	34.5	13.4924	666.54	336	9.1	0.164	8	1.41	274	14935.8
101.5	23.5	20.9225	1270.25	39	20.3	0.364	5.1	1.3	12	14935.8
115.5	38	13.8781	508.86	381	18.2	0.097	7	1.31	242	14929.2
103.5	30.5	16.136	945.65	315	16.1	0.122	7.8	1.41	278	14929.2
103.5	30.5	16.136	945.65	315	16.1	0.122	7.8	1.41	284	14929.2
108	34.5	14.6032	603.19	327	9.1	0.2545	8	1.41	158	14922.6
100	25	18.8685	1183.77	57	20.3	0.16	5.1	1.3	36	14922.6
112.5	29	17.5684	1342.91	228	32.2	0.198	6.1	1.22	178	14916
123.5	43.5	7.43863	438.99	135	41.3	0.075	6.3	1.27	16	14909.4
109.5	34.5	9.59503	768.67	318	14	0.196	6.4	1.41	136	14909.4
104.5	30.5	17.0463	808.94	387	10.5	0.129	8	1.37	106	14909.4
105	30	17.6672	872.26	336	16.1	0.129	7.8	1.41	82	14909.4
111.5	27.5	16.2657	1463.65	195	17.5	0.259	4.8	1.25	176	14909.4
109.5	35	13.3733	609.49	318	16.1	0.137	7.8	1.41	86	14902.8
104.5	30.5	17.0463	808.94	318	16.1	0.129	7.8	1.41	96	14902.8
111.5	28.5	15.9627	1480.38	261	17.5	0.236	4.8	1.25	350	14902.8
111.5	28.5	15.9627	1480.38	261	17.5	0.198	4.8	1.25	256	14902.8
103.5	30.5	16.136	945.65	315	16.1	0.122	7.8	1.41	286	14896.2
120	29.5	17.6039	1462.37	174	33.6	0.14	5.9	1.4	220	14896.2
111.5	28.5	15.9627	1480.38	261	20.3	0.19	5.1	1.3	302	14896.2
121.5	41	9.75867	472.51	144	41.3	0.171	6.3	1.27	72	14889.6
108	34.5	14.6032	603.19	327	9.1	0.2545	8	1.41	118	14889.6
104.5	30.5	17.0463	808.94	387	10.5	0.129	8	1.37	116	14889.6
104.5	30.5	17.0463	808.94	387	10.5	0.129	8	1.37	106	14889.6
104.5	30.5	17.0463	808.94	318	16.1	0.129	7.8	1.41	114	14883
78	37.5	10.1557	26.14	12	33.6	0.077	5.9	1.4	10	14876.4
108.5	34.5	14.7994	590.65	282	14	0.142	6.4	1.41	110	14869.8
104.5	30.5	17.0463	808.94	387	10.5	0.129	8	1.37	96	14869.8
125	44	5.92284	449.64	252	27.3	0.159	6.4	1.3	56	14863.2
108.5	34.5	14.7994	590.65	282	14	0.142	6.4	1.41	16	14863.2
104.5	30.5	17.0463	808.94	318	16.1	0.129	7.8	1.41	158	14863.2
104.5	30.5	17.0463	808.94	318	16.1	0.129	7.8	1.41	90	14863.2
103.5	30.5	16.136	945.65	315	16.1	0.122	7.8	1.41	282	14856.6
103.5	30.5	16.136	945.65	315	16.1	0.122	7.8	1.41	274	14856.6
104.5	30.5	17.0463	808.94	318	16.1	0.129	7.8	1.41	128	14850
111.5	28.5	15.9627	1480.38	261	17.5	0.198	4.8	1.25	296	14843.4
111.5	28.5	15.9627	1480.38	261	17.5	0.198	4.8	1.25	268	14843.4
100.5	25	17.8203	1124.89	54	20.3	0.16	5.1	1.3	56	14843.4
103.5	30.5	16.136	945.65	315	16.1	0.122	7.8	1.41	256	14836.8
125	44.5	5.70634	425.42	252	30.1	0.208	6.9	1.355	38	14830.2
123.5	43.5	7.43863	438.99	135	41.3	0.075	6.3	1.27	30	14830.2
123.5	43.5	7.43863	438.99	135	41.3	0.071	6.3	1.27	36	14830.2
116.5	35.5	14.4793	606.08	378	11.9	0.153	6.3	1.54	350	14830.2
116.5	35.5	14.4793	606.08	378	11.9	0.153	6.3	1.54	358	14830.2
112	28.5	16.5522	1485.87	255	17.5	0.198	4.8	1.25	262	14830.2
107.5	27.5	15.5639	1252.27	156	16.1	0.223	4.9	1.19	36	14830.2
100.5	25.5	16.6049	1012.01	60	16.1	0.19	7.8	1.41	54	14830.2
105	30	17.6672	872.26	336	16.1	0.129	7.8	1.41	120	14823.6
104.5	30.5	17.0463	808.94	318	16.1	0.129	7.8	1.41	114	14817
117	28	17.8163	2006.71	162	33.6	0.206	5.9	1.4	172	14817
123.5	44	6.98189	410.95	114	41.3	0.075	6.3	1.27	10	14810.4
123.5	44	6.98189	410.95	114	41.3	0.075	6.3	1.27	14	14810.4
109.5	34.5	9.59503	768.67	318	16.1	0.196	7.8	1.41	98	14810.4
104.5	23.5	19.2501	1150.71	54	30.1	0.137	7.5	1.24	20	14810.4
123.5	44	6.98189	410.95	114	41.3	0.075	6.3	1.27	10	14803.8
123.5	44	6.98189	410.95	114	41.3	0.075	6.3	1.27	12	14803.8
123.5	44	6.98189	410.95	114	41.3	0.075	6.3	1.27	14	14803.8
123.5	44	6.98189	410.95	114	41.3	0.075	6.3	1.27	12	14803.8
123.5	44	6.98189	410.95	114	41.3	0.075	6.3	1.27	14	14803.8
103.5	30.5	16.136	945.65	315	16.1	0.122	7.8	1.41	278	14803.8
118	29.5	15.3734	1627.25	72	42.7	0.181	4.8	1.27	134	14803.8
120	29	17.5166	1513.24	159	33.6	0.1855	5.9	1.4	202	14803.8
114	28	16.9923	1750.09	99	42.7	0.248	4.8	1.27	24	14803.8
107.5	28	16.1363	1182.97	156	30.1	0.239	7.5	1.24	40	14803.8
111	27	16.6021	1376.62	195	14	0.219	4.9	1.43	126	14803.8
111	27	16.6021	1376.62	195	14	0.219	4.9	1.43	128	14803.8
125	44.5	5.70634	425.42	252	30.1	0.208	6.9	1.355	38	14797.2
104.5	30.5	17.0463	808.94	318	16.1	0.129	7.8	1.41	106	14797.2
123.5	44	6.98189	410.95	114	41.3	0.075	6.3	1.27	12	14790.6
112	28	15.5633	1573.88	234	17.5	0.205	4.8	1.25	146	14790.6
109.5	34.5	9.59503	768.67	318	16.1	0.196	7.8	1.41	114	14784
123.5	44	6.98189	410.95	114	41.3	0.075	6.3	1.27	14	14777.4
108	34.5	14.6032	603.19	327	9.1	0.248	8	1.41	250	14777.4
109	34	10.4874	830.77	339	8.4	0.217	8	1.39	332	14777.4
103.5	30.5	16.136	945.65	315	16.1	0.122	7.8	1.41	248	14764.2
104.5	30.5	17.0463	808.94	318	16.1	0.129	7.8	1.41	112	14764.2
114.5	36.5	14.519	701.75	405	8.4	0.187	8	1.39	362	14757.6
114.5	36.5	14.519	701.75	405	8.4	0.187	8	1.39	346	14751
112	28.5	16.5522	1485.87	255	17.5	0.236	4.8	1.25	284	14751
106.5	24	21.6631	919.44	36	42.7	0.137	4.8	1.27	18	14751
115.5	39	14.0196	312.74	366	11.9	0.2145	6.3	1.54	332	14744.4
108	34.5	14.6032	603.19	327	9.1	0.201	8	1.41	258	14744.4
103.5	30.5	16.136	945.65	315	16.1	0.122	7.8	1.41	278	14744.4
119.5	30	16.4837	1335.96	111	42.7	0.184	4.8	1.27	254	14744.4
100	23.5	21.2915	1347.08	42	16.1	0.097	4.9	1.19	32	14744.4
108	34.5	14.6032	603.19	327	9.1	0.248	8	1.41	242	14737.8
103.5	30	13.3418	959.63	324	16.1	0.17	7.8	1.41	160	14737.8
112.5	35	14.8569	685.57	288	14	0.187	8	1.41	310	14731.2
112.5	35	14.8569	685.57	288	14	0.187	8	1.41	322	14731.2
112.5	35	14.8569	685.57	288	14	0.187	8	1.41	328	14731.2
112.5	35	14.8569	685.57	288	14	0.157	8	1.41	352	14731.2
109.5	34.5	9.59503	768.67	318	16.1	0.196	7.8	1.41	104	14724.6
109	34	10.4874	830.77	339	9.1	0.217	8	1.41	326	14724.6
115.5	33.5	15.8205	1280.82	417	14	0.249	8	1.41	122	14724.6
112	28.5	16.5522	1485.87	255	17.5	0.198	4.8	1.25	272	14724.6
111	27	16.6021	1376.62	195	14	0.191	4.9	1.43	118	14724.6
103.5	30.5	16.136	945.65	324	10.5	0.157	8	1.37	240	14718
108	34.5	14.6032	603.19	327	9.1	0.201	8	1.41	196	14698.2
113.5	33	15.3475	1429.34	357	14	0.261	6.6	1.37	198	14698.2
103.5	30	13.3418	959.63	324	11.9	0.169	7.2	1.36	222	14698.2
115.5	33.5	15.8205	1280.82	417	14	0.249	8	1.41	66	14691.6
109.5	34.5	9.59503	768.67	318	16.1	0.245	7.8	1.41	128	14678.4
114	33	15.8287	1399.98	429	8.4	0.213	6.8	1.27	222	14671.8
103.5	30.5	16.136	945.65	315	16.1	0.122	7.8	1.41	238	14671.8
111.5	28	15.8823	1490.17	168	25.2	0.197	5	1.31	74	14671.8
104	24.5	17.5192	982.24	42	42.7	0.206	4.8	1.27	12	14671.8
114.5	35	15.4769	694.38	372	11.9	0.232	7.2	1.36	268	14665.2
109.5	34.5	9.59503	768.67	318	16.1	0.196	7.8	1.41	164	14665.2
105	30	17.6672	872.26	336	16.1	0.129	7.8	1.41	110	14665.2
109	25.5	19.1786	1732.21	27	42.7	0.222	4.8	1.27	42	14665.2
117	34.5	15.4168	980.9	306	21	0.198	6.7	1.29	244	14658.6
117	34.5	15.4168	980.9	306	21	0.198	6.7	1.29	260	14658.6
110.5	27	16.9191	1391.25	159	25.2	0.197	5	1.31	148	14658.6
103.5	23.5	17.2897	1217.2	45	25.2	0.434	5	1.31	38	14658.6
109.5	34.5	9.59503	768.67	318	16.1	0.199	7.8	1.41	126	14652
109.5	34.5	9.59503	768.67	318	16.1	0.245	7.8	1.41	166	14652
109.5	34.5	9.59503	768.67	318	16.1	0.217	7.8	1.41	200	14652
111	27	16.6021	1376.62	195	17.5	0.205	4.8	1.25	118	14652
109.5	34.5	9.59503	768.67	318	16.1	0.245	7.8	1.41	192	14645.4
109.5	34.5	9.59503	768.67	318	16.1	0.217	7.8	1.41	216	14645.4
109.5	34.5	9.59503	768.67	318	16.1	0.245	7.8	1.41	222	14645.4
109.5	34.5	9.59503	768.67	318	16.1	0.245	7.8	1.41	268	14645.4
109.5	34.5	9.59503	768.67	318	16.1	0.245	7.8	1.41	212	14645.4
105.5	30	17.7753	928.38	267	20.3	0.267	5.1	1.3	98	14645.4
112	28.5	16.5522	1485.87	255	17.5	0.198	4.8	1.25	270	14645.4
104.5	24	17.1651	1109.7	54	42.7	0.308	4.8	1.27	22	14645.4
109.5	34.5	9.59503	768.67	318	16.1	0.245	7.8	1.41	248	14638.8
109.5	34.5	9.59503	768.67	318	16.1	0.245	7.8	1.41	240	14638.8
109.5	34.5	9.59503	768.67	318	16.1	0.245	7.8	1.41	224	14638.8
109.5	34.5	9.59503	768.67	318	16.1	0.245	7.8	1.41	264	14638.8
117.5	34.5	15.4961	981.3	351	21	0.198	6.7	1.29	358	14638.8
117.5	34.5	15.4961	981.3	351	21	0.198	6.7	1.29	338	14638.8
117.5	34.5	15.4961	981.3	351	21	0.198	6.7	1.29	354	14638.8
104.5	29.5	17.6058	826.59	237	16.1	0.202	7.8	1.41	114	14638.8
114.5	35.5	15.0289	629.26	384	9.1	0.201	8	1.41	316	14632.2
109.5	34.5	9.59503	768.67	318	16.1	0.196	7.8	1.41	160	14632.2
107.5	27.5	15.5639	1252.27	156	15.4	0.257	4.8	1.21	38	14625.6
109.5	34.5	9.59503	768.67	318	16.1	0.245	7.8	1.41	286	14619
117.5	32	16.9032	980.31	231	33.6	0.263	5.9	1.4	348	14619
109.5	34.5	9.59503	768.67	318	16.1	0.245	7.8	1.41	274	14612.4
114	26.5	16.332	1633.76	72	42.7	0.248	4.8	1.27	76	14612.4
109.5	34.5	9.59503	768.67	318	16.1	0.217	7.8	1.41	156	14605.8
109.5	34.5	9.59503	768.67	318	16.1	0.201	7.8	1.41	300	14605.8
109.5	34.5	9.59503	768.67	318	16.1	0.245	7.8	1.41	292	14605.8
109.5	34.5	9.59503	768.67	318	16.1	0.245	7.8	1.41	324	14605.8
109.5	34.5	9.59503	768.67	318	16.1	0.245	7.8	1.41	336	14605.8
107.5	27.5	15.5639	1252.27	156	16.8	0.239	6.3	1.37	44	14605.8
109.5	34.5	9.59503	768.67	318	16.1	0.245	7.8	1.41	274	14599.2
109.5	34.5	9.59503	768.67	318	16.1	0.245	7.8	1.41	342	14599.2
117.5	34.5	15.4961	981.3	351	21	0.198	6.7	1.29	154	14599.2
103.5	30.5	16.136	945.65	315	16.1	0.122	7.8	1.41	262	14599.2
103.5	30.5	16.136	945.65	315	16.1	0.122	7.8	1.41	240	14599.2
112	28.5	16.5522	1485.87	255	17.5	0.198	4.8	1.25	280	14592.6
112	28.5	16.5522	1485.87	255	17.5	0.198	4.8	1.25	306	14592.6
112	28.5	16.5522	1485.87	255	17.5	0.198	4.8	1.25	312	14592.6
111.5	27.5	16.2657	1463.65	195	25.2	0.309	5	1.31	180	14592.6
109.5	34.5	9.59503	768.67	318	16.1	0.245	7.8	1.41	318	14586
114	33	15.8287	1399.98	429	8.4	0.213	6.8	1.27	158	14586
106	27	14.2502	1341.35	177	30.1	0.257	7.5	1.24	22	14586
103.5	30.5	16.136	945.65	315	16.1	0.122	7.8	1.41	262	14579.4
118.5	26	17.3927	1779.07	105	25.2	0.227	5	1.31	124	14579.4
124	44	6.66139	449.94	159	41.3	0.144	6.3	1.27	18	14572.8
117.5	34.5	15.4961	981.3	351	21	0.166	6.7	1.29	182	14572.8
117.5	34.5	15.4961	981.3	351	21	0.198	6.7	1.29	214	14572.8
117	34.5	15.4168	980.9	306	21	0.198	6.7	1.29	272	14572.8
102.5	23	20.2953	1553.96	36	14	0.129	6.6	1.31	10	14572.8
114	33	15.8287	1399.98	429	8.4	0.213	6.8	1.27	98	14566.2
105	30	17.6672	872.26	336	10.5	0.17	8	1.37	82	14566.2
115.5	25	20.4815	1776.81	51	33.6	0.164	5.9	1.4	44	14566.2
120	29.5	17.6039	1462.37	174	42.7	0.293	4.8	1.27	218	14559.6
117	24	21.895	1589.58	93	25.2	0.112	5	1.31	64	14559.6
125.5	44.5	5.40626	449.41	237	30.1	0.08	6.9	1.355	58	14553
109.5	34.5	9.59503	768.67	318	16.1	0.196	7.8	1.41	170	14553
117	34.5	15.4168	980.9	306	21	0.198	6.7	1.29	306	14546.4
110.5	27	16.9191	1391.25	153	25.2	0.205	5	1.31	94	14546.4
99.5	26	14.0723	1212.26	33	14	0.162	6.6	1.31	34	14546.4
117.5	34.5	15.4961	981.3	351	21	0.147	6.7	1.29	362	14539.8
114	33	15.8287	1399.98	429	8.4	0.213	6.8	1.27	116	14539.8
114	33	15.8287	1399.98	429	8.4	0.213	6.8	1.27	82	14539.8
100.5	25	17.8203	1124.89	54	14	0.234	4.8	1.29	64	14539.8
114.5	24.5	21.9899	1794.42	57	42.7	0.248	4.8	1.27	10	14539.8
114.5	35.5	15.0289	629.26	384	5.6	0.259	8.2	1.48	306	14533.2
114.5	35.5	15.0289	629.26	384	5.6	0.259	8.2	1.48	268	14533.2
114.5	35.5	15.0289	629.26	384	5.6	0.259	8.2	1.48	220	14533.2
109.5	34.5	9.59503	768.67	318	16.1	0.196	7.8	1.41	204	14533.2
109.5	34.5	9.59503	768.67	318	16.1	0.196	7.8	1.41	162	14533.2
106.5	24	21.6631	919.44	36	42.7	0.137	4.8	1.27	18	14533.2
114.5	35.5	15.0289	629.26	384	5.6	0.259	8.2	1.48	338	14526.6
114.5	35.5	15.0289	629.26	384	5.6	0.259	8.2	1.48	292	14526.6
117.5	34.5	15.4961	981.3	351	21	0.198	6.7	1.29	362	14526.6
117	34.5	15.4168	980.9	306	21	0.198	6.7	1.29	310	14526.6
105	30	17.6672	872.26	336	10.5	0.17	8	1.37	78	14526.6
114.5	38	14.5147	576.88	411	8.4	0.224	6.5	1.44	304	14520
109.5	34.5	9.59503	768.67	318	16.1	0.245	7.8	1.41	226	14520
109.5	34.5	9.59503	768.67	318	16.1	0.196	7.8	1.41	214	14520
107.5	27.5	15.5639	1252.27	156	16.1	0.219	4.9	1.19	44	14520
107.5	27.5	15.5639	1252.27	156	16.1	0.223	4.9	1.19	44	14520
107.5	27.5	15.5639	1252.27	156	16.1	0.223	4.9	1.19	44	14520
111	27	16.6021	1376.62	195	20.3	0.19	5.1	1.3	126	14520
111	27	16.6021	1376.62	195	20.3	0.155	5.1	1.3	130	14520
109.5	34.5	9.59503	768.67	318	16.1	0.196	7.8	1.41	176	14513.4
115.5	28	18.1723	1543.62	372	16.1	0.183	7.8	1.41	362	14513.4
115.5	28	18.1723	1543.62	372	16.1	0.183	7.8	1.41	346	14513.4
115.5	28	18.1723	1543.62	372	16.1	0.183	7.8	1.41	334	14513.4
115.5	28	18.1723	1543.62	372	16.1	0.183	7.8	1.41	320	14513.4
109.5	34.5	9.59503	768.67	318	16.1	0.245	7.8	1.41	254	14506.8
117.5	34.5	15.4961	981.3	351	21	0.166	6.7	1.29	334	14506.8
117.5	28	16.7571	2065.89	135	33.6	0.164	5.9	1.4	156	14506.8
122	41.5	9.39205	330.51	231	27.3	0.188	6.4	1.3	20	14500.2
114	36	14.491	747.29	339	9.1	0.244	8	1.41	298	14500.2
109.5	34.5	9.59503	768.67	318	16.1	0.196	7.8	1.41	178	14500.2
109.5	34.5	9.59503	768.67	318	16.1	0.245	7.8	1.41	242	14500.2
114	33	15.8287	1399.98	429	8.4	0.213	6.8	1.27	174	14500.2
115.5	28	18.1723	1543.62	372	16.1	0.183	7.8	1.41	242	14493.6
115.5	28	18.1723	1543.62	372	16.1	0.183	7.8	1.41	348	14493.6
115.5	28	18.1723	1543.62	372	16.1	0.169	7.8	1.41	340	14493.6
115.5	28	18.1723	1543.62	372	16.1	0.169	7.8	1.41	310	14493.6
104	23	20.837	1681.01	72	15.4	0.308	4.8	1.21	24	14493.6
109.5	34.5	9.59503	768.67	318	16.1	0.245	7.8	1.41	258	14487
109.5	34.5	9.59503	768.67	318	16.1	0.245	7.8	1.41	278	14487
100.5	25.5	16.6049	1012.01	60	20.3	0.176	6.8	1.23	36	14487
126	46	4.75135	432.24	258	30.1	0.236	6.9	1.355	30	14480.4
109.5	34.5	9.59503	768.67	318	16.1	0.245	7.8	1.41	264	14480.4
115	33.5	15.7779	1242.26	468	14.7	0.306	6.9	1.56	280	14480.4
115	33.5	15.7779	1242.26	468	14.7	0.306	6.9	1.56	246	14480.4
104.5	31	17.0101	785.74	318	16.1	0.129	7.8	1.41	84	14480.4
105	30	17.6672	872.26	336	10.5	0.17	8	1.37	80	14480.4
113	33.5	15.507	1265.23	300	11.9	0.2145	6.3	1.54	352	14473.8
113	33.5	15.507	1265.23	300	11.9	0.2145	6.3	1.54	356	14473.8
104	30	15.0266	852.12	333	20.3	0.342	5.1	1.3	130	14473.8
122	41.5	9.39205	330.51	231	27.3	0.188	6.4	1.3	26	14467.2
105	29	18.0467	925.78	213	20.3	0.148	5.1	1.3	134	14467.2
118	28.5	17.6177	1770.26	141	33.6	0.152	5.9	1.4	112	14467.2
115.5	28	18.1723	1543.62	372	16.1	0.169	7.8	1.41	238	14467.2
115.5	28	18.1723	1543.62	372	16.1	0.183	7.8	1.41	362	14467.2
102.5	23	20.2953	1553.96	36	14	0.129	6.6	1.31	10	14467.2
103.5	30.5	16.136	945.65	315	16.1	0.122	7.8	1.41	238	14460.6
105	30	17.6672	872.26	336	10.5	0.17	8	1.37	96	14460.6
114	25.5	19.4412	1606.52	36	42.7	0.248	4.8	1.27	20	14460.6
114.5	35.5	15.0289	629.26	384	8.4	0.201	8	1.39	264	14454
112	33	16.4062	1145.3	378	14	0.31	6.6	1.37	34	14454
107.5	27.5	15.5639	1252.27	156	16.1	0.223	4.9	1.19	50	14454
112	27	16.2865	1546.48	243	17.5	0.179	4.8	1.25	178	14454
112	26.5	16.8554	1501.06	243	17.5	0.253	4.8	1.25	142	14454
100	23.5	21.2915	1347.08	42	16.1	0.248	7.8	1.41	28	14454
110.5	34.5	11.7302	667.6	165	30.1	0.259	7.5	1.24	200	14447.4
117.5	28	16.7571	2065.89	135	33.6	0.164	5.9	1.4	122	14447.4
115.5	33.5	15.8205	1280.82	399	14	0.249	8	1.41	172	14440.8
115.5	33.5	15.8205	1280.82	399	14	0.249	8	1.41	168	14440.8
105	30	17.6672	872.26	336	10.5	0.17	8	1.37	108	14440.8
115.5	28	18.1723	1543.62	372	16.1	0.19	7.8	1.41	316	14440.8
115.5	28	18.1723	1543.62	372	16.1	0.19	7.8	1.41	322	14440.8
115.5	28	18.1723	1543.62	372	16.1	0.19	7.8	1.41	326	14440.8
100	23.5	21.2915	1347.08	42	16.1	0.097	4.9	1.19	36	14440.8
109.5	35	13.3733	609.49	318	5.6	0.217	8.3	1.4	134	14434.2
109.5	35	13.3733	609.49	318	5.6	0.217	8.3	1.4	130	14434.2
108	34	9.3702	878.65	327	16.1	0.2545	7.8	1.41	306	14434.2
102.5	23	20.2953	1553.96	36	14	0.129	6.6	1.31	22	14434.2
115.5	33.5	15.8205	1280.82	399	14	0.249	8	1.41	262	14427.6
116.5	36	13.5042	586.62	378	10.5	0.158	6.5	1.43	206	14421
116.5	36	13.5042	586.62	378	8.4	0.205	6.5	1.44	328	14421
116	28	18.7768	1632.22	300	17.5	0.192	4.8	1.25	268	14421
115.5	28	18.1723	1543.62	372	16.1	0.169	7.8	1.41	338	14421
114	36	14.491	747.29	339	9.1	0.244	8	1.41	228	14414.4
116.5	36	13.5042	586.62	378	10.5	0.158	6.5	1.43	242	14414.4
109.5	35	13.3733	609.49	318	5.6	0.199	8.3	1.4	134	14414.4
106.5	24	21.6631	919.44	36	42.7	0.137	4.8	1.27	10	14414.4
76	39	11.5742	24.7	99	33.6	0.219	5.9	1.4	140	14407.8
76	39	11.5742	24.7	99	33.6	0.219	5.9	1.4	146	14407.8
76	39	11.5742	24.7	99	33.6	0.219	5.9	1.4	140	14407.8
76	39	11.5742	24.7	99	33.6	0.219	5.9	1.4	152	14407.8
76	39	11.5742	24.7	99	33.6	0.219	5.9	1.4	146	14407.8
116.5	36	13.5042	586.62	378	8.4	0.205	6.5	1.44	324	14407.8
100	23.5	21.2915	1347.08	42	16.1	0.097	4.9	1.19	36	14407.8
105	30	17.6672	872.26	336	10.5	0.17	8	1.37	74	14401.2
120	36.5	13.6796	669.48	342	21	0.153	6.7	1.29	214	14394.6
120	36.5	13.6796	669.48	342	21	0.153	6.7	1.29	218	14394.6
109	34.5	13.4924	666.54	336	5.6	0.189	8.3	1.4	164	14394.6
104	29.5	15.8156	826.73	255	10.5	0.268	8	1.37	118	14394.6
116	28	18.7768	1632.22	300	17.5	0.238	4.8	1.25	252	14394.6
116	28	18.7768	1632.22	300	17.5	0.238	4.8	1.25	248	14394.6
115.5	28	18.1723	1543.62	372	16.1	0.183	7.8	1.41	298	14394.6
115.5	28	18.1723	1543.62	372	16.1	0.183	7.8	1.41	330	14394.6
115.5	28	18.1723	1543.62	372	16.1	0.169	7.8	1.41	336	14394.6
115.5	33.5	15.8205	1280.82	399	14	0.249	8	1.41	164	14388
115.5	33.5	15.8205	1280.82	399	14	0.249	8	1.41	156	14388
115.5	33.5	15.8205	1280.82	399	14	0.249	8	1.41	142	14388
114	36	14.491	747.29	327	9.1	0.263	8	1.41	202	14381.4
114.5	33	15.9995	1295.27	468	14	0.187	8	1.41	234	14381.4
107	29.5	15.0341	1177.62	336	16.1	0.202	7.8	1.41	70	14381.4
115.5	33.5	15.8205	1280.82	399	14	0.249	8	1.41	78	14374.8
115.5	28	18.1723	1543.62	372	16.1	0.183	7.8	1.41	294	14374.8
105	29	18.0467	925.78	213	20.3	0.202	5.1	1.3	130	14368.2
116	28	18.7768	1632.22	300	17.5	0.233	4.8	1.25	260	14368.2
102.5	23	20.2953	1553.96	36	14	0.129	6.6	1.31	16	14368.2
116.5	36	13.5042	586.62	378	10.5	0.158	6.5	1.43	100	14361.6
114.5	33	15.9995	1295.27	468	8.4	0.213	6.8	1.27	210	14361.6
114.5	33	15.9995	1295.27	468	8.4	0.213	6.8	1.27	210	14361.6
105	29	18.0467	925.78	213	20.3	0.148	5.1	1.3	180	14361.6
114.5	37	14.6453	726.36	366	9.1	0.147	8	1.41	258	14355
114.5	37	14.6453	726.36	366	9.1	0.147	8	1.41	358	14355
114.5	37	14.6453	726.36	366	9.1	0.147	8	1.41	320	14355
110	35	13.032	620.63	237	16.1	0.217	7.8	1.41	152	14355
115.5	33.5	15.8205	1280.82	399	14	0.249	8	1.41	78	14355
119	32	15.0025	120.01	294	14.7	0.081	5.6	1.47	262	14355
107.5	27.5	15.5639	1252.27	156	16.1	0.223	4.9	1.19	48	14355
109	34.5	13.4924	666.54	336	5.6	0.189	8.3	1.4	196	14348.4
104	29.5	15.8156	826.73	255	10.5	0.268	8	1.37	126	14348.4
107	29.5	15.0341	1177.62	336	16.1	0.202	7.8	1.41	90	14348.4
103.5	23.5	17.2897	1217.2	45	16.1	0.086	4.9	1.19	26	14348.4
110	35	13.032	620.63	237	16.1	0.196	7.8	1.41	80	14341.8
105	30.5	17.1816	871.76	336	16.1	0.129	7.8	1.41	132	14341.8
116	28	18.7768	1632.22	300	17.5	0.233	4.8	1.25	250	14341.8
116	28	18.7768	1632.22	300	17.5	0.233	4.8	1.25	260	14341.8
99.5	25	17.8621	1361.09	27	25.2	0.304	5	1.31	28	14341.8
116	38.5	13.9519	448.79	336	18.2	0.261	7	1.31	192	14335.2
110.5	35	13.8158	549.11	249	9.1	0.244	8	1.41	140	14335.2
108	34	9.3702	878.65	327	16.1	0.2545	7.8	1.41	292	14335.2
107	29.5	15.0341	1177.62	336	16.1	0.202	7.8	1.41	76	14335.2
107	29.5	15.0341	1177.62	336	16.1	0.202	7.8	1.41	74	14335.2
110	35	13.032	620.63	237	16.1	0.196	7.8	1.41	186	14328.6
108	34	9.3702	878.65	327	16.1	0.2545	7.8	1.41	196	14328.6
104	30	15.0266	852.12	255	16.1	0.168	7.8	1.41	98	14328.6
104	29.5	15.8156	826.73	255	10.5	0.268	8	1.37	126	14328.6
126	46.5	4.13022	396.34	258	30.1	0.236	6.9	1.355	56	14322
122	41.5	9.39205	330.51	150	35.7	0.189	7.8	1.36	56	14322
109	34.5	13.4924	666.54	336	5.6	0.189	8.3	1.4	62	14322
108	34	9.3702	878.65	327	16.1	0.2545	7.8	1.41	216	14322
114.5	33	15.9995	1295.27	468	8.4	0.213	6.8	1.27	196	14322
108	27.5	15.4513	1226.21	105	30.1	0.257	7.5	1.24	52	14322
110	35	13.032	620.63	237	16.1	0.217	7.8	1.41	66	14308.8
109	34.5	13.4924	666.54	336	5.6	0.189	8.3	1.4	58	14308.8
108	34	9.3702	878.65	327	16.1	0.2545	7.8	1.41	210	14308.8
108	34	9.3702	878.65	327	16.1	0.2545	7.8	1.41	286	14308.8
108	34	9.3702	878.65	327	16.1	0.2545	7.8	1.41	322	14308.8
112.5	28.5	17.2982	1490.09	276	17.5	0.236	4.8	1.25	292	14308.8
108	34	9.3702	878.65	327	16.1	0.2545	7.8	1.41	232	14302.2
108	34	9.3702	878.65	327	16.1	0.2545	7.8	1.41	224	14302.2
108	34	9.3702	878.65	327	16.1	0.2545	7.8	1.41	270	14302.2
108	34	9.3702	878.65	327	16.1	0.2545	7.8	1.41	326	14302.2
114.5	32.5	16.3401	1211.42	402	19.6	0.112	5.1	1.27	236	14302.2
107	29.5	15.0341	1177.62	336	16.1	0.202	7.8	1.41	84	14302.2
107	29.5	15.0341	1177.62	336	16.1	0.202	7.8	1.41	84	14302.2
116	28	18.7768	1632.22	300	14	0.206	4.9	1.43	252	14302.2
114	36	14.491	747.29	327	10.5	0.24	8	1.37	190	14295.6
105	29	18.0467	925.78	213	20.3	0.202	5.1	1.3	148	14295.6
105	29	18.0467	925.78	213	20.3	0.202	5.1	1.3	142	14295.6
105	29	18.0467	925.78	213	20.3	0.202	5.1	1.3	136	14295.6
122	41.5	9.39205	330.51	150	35.7	0.14	7.8	1.36	50	14289
122	41.5	9.39205	330.51	150	35.7	0.189	7.8	1.36	84	14289
109	34.5	13.4924	666.54	336	5.6	0.189	8.3	1.4	70	14289
108	34	9.3702	878.65	327	16.1	0.2545	7.8	1.41	250	14289
108	34	9.3702	878.65	327	16.1	0.2545	7.8	1.41	258	14289
108	34	9.3702	878.65	327	16.1	0.2545	7.8	1.41	298	14289
108	34	9.3702	878.65	327	16.1	0.2545	7.8	1.41	336	14289
112	26.5	16.8554	1501.06	243	20.3	0.162	5.1	1.3	132	14289
110	35	13.032	620.63	237	16.1	0.196	7.8	1.41	156	14282.4
110.5	35	13.8158	549.11	249	9.1	0.209	8	1.41	92	14282.4
108	34	9.3702	878.65	327	16.1	0.2545	7.8	1.41	296	14282.4
114.5	33	15.9995	1295.27	468	8.4	0.213	6.8	1.27	188	14282.4
117	30.5	16.337	1391.39	213	25.2	0.227	5	1.31	336	14282.4
112.5	28.5	17.2982	1490.09	276	17.5	0.236	4.8	1.25	296	14282.4
78	37.5	10.1557	26.14	0	33.6	0.077	5.9	1.4	10	14275.8
116	36	13.7287	545.65	372	8.4	0.24	6.5	1.44	92	14275.8
108	34	9.3702	878.65	327	16.1	0.2545	7.8	1.41	334	14275.8
108	34	9.3702	878.65	327	16.1	0.2545	7.8	1.41	336	14275.8
105	29	18.0467	925.78	213	20.3	0.211	5.1	1.3	162	14275.8
115.5	37	13.8443	587.07	357	18.2	0.1	7	1.31	178	14269.2
115.5	28	18.1723	1543.62	372	14	0.297	4.9	1.43	300	14269.2
125	44.5	5.70634	425.42	225	34.3	0.208	7.2	1.23	60	14262.6
115.5	37	13.8443	587.07	357	18.2	0.1	7	1.31	164	14262.6
108	34	9.3702	878.65	327	16.1	0.2545	7.8	1.41	316	14262.6
108	34	9.3702	878.65	327	16.1	0.2545	7.8	1.41	356	14262.6
108	34	9.3702	878.65	327	16.1	0.2545	7.8	1.41	358	14262.6
108	34	9.3702	878.65	327	16.1	0.2545	7.8	1.41	360	14262.6
108	34	9.3702	878.65	327	16.1	0.2545	7.8	1.41	352	14262.6
108	34	9.3702	878.65	327	16.1	0.201	7.8	1.41	344	14262.6
109	34.5	13.4924	666.54	336	5.6	0.189	8.3	1.4	126	14256
108	34	9.3702	878.65	327	16.1	0.2545	7.8	1.41	326	14256
108	34	9.3702	878.65	327	16.1	0.2545	7.8	1.41	350	14256
113.5	33	15.3475	1429.34	357	14	0.25	6.3	1.28	346	14256
104	29.5	15.8156	826.73	255	10.5	0.268	8	1.37	130	14256
104.5	29.5	17.6058	826.59	312	20.3	0.342	5.1	1.3	72	14256
105	29	18.0467	925.78	213	20.3	0.202	5.1	1.3	158	14256
112.5	28.5	17.2982	1490.09	276	17.5	0.236	4.8	1.25	294	14256
126	46	4.75135	432.24	258	29.4	0.19	6.9	1.22	34	14249.4
109.5	34.5	9.59503	768.67	318	14	0.142	6.4	1.41	130	14249.4
126	46	4.75135	432.24	258	29.4	0.19	6.9	1.22	34	14242.8
126	46	4.75135	432.24	258	29.4	0.19	6.9	1.22	36	14242.8
126	46	4.75135	432.24	258	29.4	0.19	6.9	1.22	10	14242.8
108	34	9.3702	878.65	327	16.1	0.2545	6.7	1.28	318	14242.8
105.5	29.5	18.0515	928.13	222	20.3	0.1855	5.1	1.3	140	14242.8
114.5	35.5	15.0289	629.26	384	5.6	0.227	8.3	1.4	328	14236.2
110	35	13.032	620.63	237	16.1	0.217	7.8	1.41	48	14236.2
108	34	9.3702	878.65	327	16.1	0.2545	7.8	1.41	302	14236.2
115	33.5	15.7779	1242.26	468	8.4	0.187	8	1.39	366	14236.2
115	33.5	15.7779	1242.26	468	8.4	0.187	8	1.39	362	14236.2
115	33.5	15.7779	1242.26	468	8.4	0.187	8	1.39	346	14236.2
107	29.5	15.0341	1177.62	336	16.1	0.157	4.9	1.19	68	14236.2
114.5	38.5	14.2776	503.01	411	8.4	0.153	6.5	1.44	320	14229.6
108	34	9.3702	878.65	327	16.1	0.2545	7.8	1.41	312	14229.6
119	32	15.0025	120.01	291	14.7	0.081	5.6	1.47	350	14229.6
119	32	15.0025	120.01	291	14.7	0.081	5.6	1.47	356	14229.6
119	32	15.0025	120.01	291	14.7	0.081	5.6	1.47	356	14229.6
105	29	18.0467	925.78	213	20.3	0.202	5.1	1.3	182	14229.6
105	29	18.0467	925.78	213	20.3	0.202	5.1	1.3	162	14229.6
115	33.5	15.7779	1242.26	468	5.6	0.183	8.3	1.4	328	14223
115	33.5	15.7779	1242.26	468	5.6	0.183	8.3	1.4	254	14223
120.5	30	17.0537	1550.44	390	16.8	0.338	4.6	1.26	350	14223
120.5	30	17.0537	1550.44	390	16.8	0.338	4.6	1.26	224	14223
120.5	30	17.0537	1550.44	390	16.8	0.338	4.6	1.26	326	14223
108	34	9.3702	878.65	327	16.1	0.2545	6.7	1.28	342	14216.4
108	34	9.3702	878.65	327	16.1	0.2545	7.8	1.41	340	14216.4
114.5	38.5	14.2776	503.01	411	8.4	0.153	6.5	1.44	150	14209.8
107.5	34.5	13.4133	625.36	261	16.1	0.221	7.8	1.41	168	14209.8
108	34	9.3702	878.65	327	16.1	0.2545	7.8	1.41	322	14209.8
108	34	9.3702	878.65	327	16.1	0.2545	7.8	1.41	328	14209.8
119	32	15.0025	120.01	291	14.7	0.17	5.6	1.47	338	14209.8
119	32	15.0025	120.01	291	14.7	0.17	5.6	1.47	362	14209.8
107	29.5	15.0341	1177.62	336	16.8	0.148	6.3	1.37	78	14209.8
105	29	18.0467	925.78	213	20.3	0.202	5.1	1.3	176	14209.8
105	29	18.0467	925.78	213	20.3	0.202	5.1	1.3	178	14209.8
117.5	39.5	13.2338	425.98	291	23.1	0.213	6.6	1.28	250	14203.2
117.5	29	17.5191	1676.75	72	42.7	0.264	4.8	1.27	38	14203.2
116	37	13.4787	615.01	396	18.2	0.039	7	1.31	310	14196.6
104	31.5	16.8772	805.44	345	11.2	0.18	8.1	1.28	102	14196.6
104	29.5	15.8156	826.73	255	10.5	0.268	8	1.37	134	14196.6
104	29.5	15.8156	826.73	255	10.5	0.268	8	1.37	134	14196.6
117.5	39.5	13.2338	425.98	291	23.1	0.213	6.6	1.28	224	14190
117.5	39.5	13.2338	425.98	291	23.1	0.213	6.6	1.28	226	14190
117.5	39.5	13.2338	425.98	291	23.1	0.25	6.6	1.28	242	14190
108	34	9.3702	878.65	327	16.1	0.221	7.8	1.41	332	14190
108	34	9.3702	878.65	327	16.1	0.221	7.8	1.41	330	14190
108	34	9.3702	878.65	327	16.1	0.221	7.8	1.41	362	14190
108	34	9.3702	878.65	327	16.1	0.221	7.8	1.41	366	14190
108	34	9.3702	878.65	327	16.1	0.221	7.8	1.41	362	14190
108	34	9.3702	878.65	327	16.1	0.221	7.8	1.41	360	14190
108	34	9.3702	878.65	327	16.1	0.221	7.8	1.41	362	14190
108	34	9.3702	878.65	327	16.1	0.221	7.8	1.41	346	14190
113	31	17.4616	1099.29	318	20.3	0.182	5.1	1.3	246	14190
126	46	4.75135	432.24	258	29.4	0.19	6.9	1.22	44	14183.4
115	33	16.0299	1244.62	423	14.7	0.187	6.9	1.56	218	14183.4
104	30	15.0266	852.12	333	20.3	0.449	5.1	1.3	130	14183.4
101.5	23.5	20.9225	1270.25	42	16.8	0.313	6.5	1.31	10	14183.4
105.5	37.5	10.3898	201.6	54	33.6	0.247	5.9	1.4	36	14176.8
116	28	18.7768	1632.22	300	17.5	0.176	4.8	1.25	288	14176.8
116	28	18.7768	1632.22	300	17.5	0.176	4.8	1.25	282	14176.8
115	27.5	18.5036	1493.6	264	17.5	0.168	4.8	1.25	202	14176.8
76	39.5	13.1691	28.9	99	33.6	0.219	5.9	1.4	116	14170.2
107.5	34.5	13.4133	625.36	261	16.1	0.221	7.8	1.41	166	14170.2
108	34	9.3702	878.65	327	16.1	0.221	7.8	1.41	340	14170.2
108	34	9.3702	878.65	327	16.1	0.2545	7.8	1.41	322	14170.2
100	25	18.8685	1183.77	57	20.3	0.16	5.1	1.3	12	14170.2
116	34	15.9204	1121.41	405	14	0.249	8	1.41	180	14163.6
120.5	30	17.0537	1550.44	390	16.1	0.164	7.8	1.41	186	14163.6
108	34	9.3702	878.65	327	16.1	0.221	7.8	1.41	310	14157
108	34	9.3702	878.65	327	16.1	0.217	7.8	1.41	322	14157
103.5	30.5	16.136	945.65	315	10.5	0.168	8	1.37	210	14157
116	28	18.7768	1632.22	300	17.5	0.183	4.8	1.25	282	14150.4
115	27.5	18.5036	1493.6	264	17.5	0.146	4.8	1.25	202	14150.4
101	24	21.2307	1138.97	33	25.2	0.1855	5	1.31	10	14150.4
124.5	44	6.29594	454.55	195	34.3	0.075	7.2	1.23	18	14143.8
115.5	36.5	13.685	525.64	390	18.2	0.039	7	1.31	312	14143.8
110.5	34.5	11.7302	667.6	165	30.1	0.132	7.5	1.24	206	14143.8
108	34	9.3702	878.65	327	16.1	0.22	7.8	1.41	304	14143.8
108	34	9.3702	878.65	327	16.1	0.221	7.8	1.41	300	14143.8
115	33.5	15.7779	1242.26	468	8.4	0.147	8	1.39	312	14143.8
108	34	9.3702	878.65	327	16.1	0.267	7.8	1.41	298	14137.2
104.5	28.5	17.0648	954.16	204	20.3	0.202	5.1	1.3	148	14137.2
112	27.5	14.8092	1680.67	234	17.5	0.309	4.8	1.25	192	14137.2
114	36	14.491	747.29	327	8.4	0.25	8	1.39	328	14130.6
108	35	12.2836	561.55	243	14	0.142	6.4	1.41	12	14130.6
102.5	23	20.2953	1553.96	36	14	0.129	6.6	1.31	18	14130.6
122	42	8.84264	280	231	41.3	0.285	6.3	1.27	18	14124
109	35	13.698	575.9	336	5.6	0.189	8.3	1.4	108	14124
108	34	9.3702	878.65	327	16.1	0.267	7.8	1.41	284	14124
108	34	9.3702	878.65	327	16.1	0.267	7.8	1.41	280	14124
115	33.5	15.7779	1242.26	468	8.4	0.187	8	1.39	282	14124
116	28	18.7768	1632.22	300	17.5	0.183	4.8	1.25	242	14124
101.5	26	21.1619	783.58	39	42.7	0.208	4.8	1.27	46	14124
108	34	9.3702	878.65	327	16.1	0.267	7.8	1.41	262	14117.4
116.5	24	22.0346	1675.17	102	25.2	0.264	5	1.31	16	14117.4
116.5	24	22.0346	1675.17	102	25.2	0.264	5	1.31	18	14117.4
114.5	38	14.5147	576.88	411	8.4	0.153	6.5	1.44	354	14110.8
110	35	13.032	620.63	237	14	0.142	6.4	1.41	166	14110.8
110	35	13.032	620.63	237	14	0.142	6.4	1.41	138	14110.8
115.5	28.5	18.3698	1431.18	372	16.1	0.183	7.8	1.41	344	14110.8
77	38	11.6717	20.72	39	33.6	0.102	5.9	1.4	162	14104.2
77	38	11.6717	20.72	39	33.6	0.106	5.9	1.4	150	14104.2
77	38	11.6717	20.72	39	33.6	0.106	5.9	1.4	112	14104.2
114	36	14.491	747.29	327	5.6	0.263	8.2	1.48	298	14104.2
110.5	35	13.8158	549.11	249	5.6	0.263	8.2	1.48	120	14104.2
110.5	35	13.8158	549.11	249	5.6	0.263	8.2	1.48	98	14104.2
101.5	26	21.1619	783.58	39	42.7	0.208	4.8	1.27	40	14104.2
114.5	38	14.5147	576.88	411	8.4	0.153	6.5	1.44	322	14097.6
108	34	9.3702	878.65	327	16.1	0.241	7.8	1.41	246	14097.6
108	34	9.3702	878.65	327	16.1	0.221	7.8	1.41	332	14097.6
102.5	23	20.2953	1553.96	36	14	0.129	6.6	1.31	16	14097.6
114.5	38	14.5147	576.88	411	8.4	0.153	6.5	1.44	316	14091
114.5	38	14.5147	576.88	411	8.4	0.153	6.5	1.44	322	14091
114.5	38	14.5147	576.88	411	8.4	0.153	6.5	1.44	336	14091
114.5	38	14.5147	576.88	411	8.4	0.153	6.5	1.44	352	14091
114	36	14.491	747.29	327	5.6	0.263	8.2	1.48	300	14091
108	34	9.3702	878.65	327	16.1	0.241	7.8	1.41	240	14091
115	33.5	15.7779	1242.26	468	8.4	0.187	8	1.39	346	14091
117.5	29.5	17.0492	1640.49	72	42.7	0.21	4.8	1.27	32	14091
106	27	14.2502	1341.35	177	20.3	0.219	5.1	1.3	32	14091
114.5	38	14.5147	576.88	411	8.4	0.153	6.5	1.44	298	14084.4
114.5	38	14.5147	576.88	411	8.4	0.153	6.5	1.44	328	14084.4
114.5	38	14.5147	576.88	411	8.4	0.153	6.5	1.44	330	14084.4
110.5	35	13.8158	549.11	249	9.1	0.209	8	1.41	174	14084.4
116.5	33	16.3049	1054	366	21	0.239	6.7	1.29	80	14084.4
116.5	33	16.3049	1054	366	21	0.239	6.7	1.29	78	14084.4
104	30.5	16.3689	830.85	333	10.5	0.129	8	1.37	152	14084.4
112	26.5	16.8554	1501.06	243	20.3	0.173	5.1	1.3	140	14084.4
112	26.5	16.8554	1501.06	243	20.3	0.173	5.1	1.3	138	14084.4
112	26.5	16.8554	1501.06	243	20.3	0.162	5.1	1.3	124	14084.4
122	41.5	9.39205	330.51	231	41.3	0.285	6.3	1.27	24	14077.8
122	41.5	9.39205	330.51	231	41.3	0.285	6.3	1.27	24	14077.8
114.5	38	14.5147	576.88	411	8.4	0.153	6.5	1.44	328	14077.8
114.5	38	14.5147	576.88	411	8.4	0.153	6.5	1.44	326	14077.8
114.5	38	14.5147	576.88	411	8.4	0.153	6.5	1.44	322	14077.8
114.5	38	14.5147	576.88	411	8.4	0.152	6.5	1.44	324	14077.8
114.5	38	14.5147	576.88	411	8.4	0.152	6.5	1.44	330	14077.8
114.5	38	14.5147	576.88	411	8.4	0.152	6.5	1.44	340	14077.8
115	37	14.2564	646.56	411	5.6	0.201	8.2	1.48	218	14077.8
114.5	38	14.5147	576.88	411	8.4	0.152	6.5	1.44	258	14071.2
108	34	9.3702	878.65	327	16.1	0.241	7.8	1.41	264	14071.2
115	33.5	15.7779	1242.26	468	8.4	0.187	8	1.39	298	14071.2
103	26	14.1092	857.19	57	42.7	0.319	4.8	1.27	14	14071.2
99.5	25	17.8621	1361.09	27	20.3	0.176	6.8	1.23	22	14071.2
122	41.5	9.39205	330.51	231	41.3	0.285	6.3	1.27	34	14064.6
114.5	38	14.5147	576.88	411	8.4	0.153	6.5	1.44	312	14064.6
107	29.5	15.0341	1177.62	336	16.1	0.162	4.9	1.19	82	14064.6
112	26.5	16.8554	1501.06	243	20.3	0.162	5.1	1.3	126	14064.6
112	26.5	16.8554	1501.06	243	20.3	0.162	5.1	1.3	118	14064.6
112	26.5	16.8554	1501.06	243	20.3	0.179	5.1	1.3	120	14064.6
109	25.5	19.1786	1732.21	27	42.7	0.191	4.8	1.27	32	14064.6
122	41.5	9.39205	330.51	231	41.3	0.285	6.3	1.27	32	14058
122	41.5	9.39205	330.51	231	41.3	0.285	6.3	1.27	38	14058
122	41.5	9.39205	330.51	231	41.3	0.285	6.3	1.27	40	14058
104	29.5	15.8156	826.73	255	10.5	0.268	8	1.37	132	14058
126.5	44.5	4.56493	599.31	228	41.3	0.159	6.3	1.27	68	14051.4
123	41.5	9.23876	413.3	171	35.7	0.14	7.8	1.36	154	14051.4
122	41.5	9.39205	330.51	231	41.3	0.285	6.3	1.27	28	14044.8
122	41.5	9.39205	330.51	231	41.3	0.285	6.3	1.27	30	14044.8
122	41.5	9.39205	330.51	231	41.3	0.285	6.3	1.27	36	14044.8
113.5	33	15.3475	1429.34	357	14	0.25	6.3	1.28	342	14044.8
104	30.5	16.3689	830.85	333	10.5	0.129	8	1.37	152	14044.8
104.5	28.5	17.0648	954.16	204	20.3	0.17	5.1	1.3	150	14044.8
104.5	28.5	17.0648	954.16	204	20.3	0.17	5.1	1.3	150	14044.8
119.5	27.5	17.9759	1770.25	42	42.7	0.241	4.8	1.27	30	14044.8
112	26.5	16.8554	1501.06	243	20.3	0.162	5.1	1.3	114	14044.8
120	36.5	13.6796	669.48	342	21	0.219	6.7	1.29	240	14031.6
115	27.5	18.5036	1493.6	264	14	0.146	4.9	1.43	224	14031.6
110.5	26.5	14.8953	1638.15	159	14	0.2545	4.9	1.43	156	14031.6
101.5	26	21.1619	783.58	39	42.7	0.208	4.8	1.27	44	14031.6
122	41.5	9.39205	330.51	231	41.3	0.285	6.3	1.27	34	14025
122	41.5	9.39205	330.51	231	41.3	0.285	6.3	1.27	38	14025
120	36.5	13.6796	669.48	342	21	0.196	6.7	1.29	230	14025
120	36.5	13.6796	669.48	342	21	0.196	6.7	1.29	254	14025
113.5	33	15.3475	1429.34	357	14	0.25	6.3	1.28	204	14025
104	29	16.1391	823.89	186	20.3	0.202	5.1	1.3	116	14025
117	29.5	18.4576	1532.5	114	42.7	0.264	4.8	1.27	46	14025
112	27.5	14.8092	1680.67	234	17.5	0.309	4.8	1.25	180	14025
112	27.5	14.8092	1680.67	234	17.5	0.309	4.8	1.25	180	14025
112	27.5	14.8092	1680.67	234	17.5	0.309	4.8	1.25	196	14025
120	36.5	13.6796	669.48	342	21	0.196	6.7	1.29	222	14018.4
108	34	9.3702	878.65	327	16.1	0.241	7.8	1.41	266	14018.4
120	36.5	13.6796	669.48	342	21	0.196	6.7	1.29	310	14011.8
104	31	16.9402	788.12	345	10.5	0.129	8	1.37	156	14011.8
120.5	30	17.0537	1550.44	390	16.1	0.14	7.8	1.41	326	14011.8
111	27	16.6021	1376.62	195	19.6	0.191	6.6	1.34	116	14011.8
120	36.5	13.6796	669.48	342	21	0.196	6.7	1.29	252	14005.2
120	36.5	13.6796	669.48	342	21	0.196	6.7	1.29	272	14005.2
120	36.5	13.6796	669.48	342	21	0.196	6.7	1.29	268	14005.2
120	36.5	13.6796	669.48	342	21	0.196	6.7	1.29	302	14005.2
120	36.5	13.6796	669.48	342	21	0.196	6.7	1.29	286	14005.2
103.5	30	13.3418	959.63	324	16.1	0.122	7.8	1.41	250	14005.2
103.5	30	13.3418	959.63	324	16.1	0.122	7.8	1.41	256	14005.2
104	29	16.1391	823.89	186	20.3	0.202	5.1	1.3	120	14005.2
104.5	28.5	17.0648	954.16	204	20.3	0.202	5.1	1.3	152	14005.2
104.5	28.5	17.0648	954.16	204	20.3	0.202	5.1	1.3	128	14005.2
126	45.5	4.80709	464.33	228	30.1	0.159	6.9	1.355	52	13998.6
110.5	35	13.8158	549.11	249	5.6	0.209	8.2	1.48	146	13998.6
103.5	30	13.3418	959.63	324	10.5	0.168	8	1.37	196	13998.6
107	27.5	15.3603	1268.8	135	30.1	0.257	7.5	1.24	66	13998.6
106	27	14.2502	1341.35	177	20.3	0.219	5.1	1.3	46	13998.6
110.5	35	13.8158	549.11	249	5.6	0.209	8.2	1.48	102	13985.4
104.5	29.5	17.6058	826.59	312	20.3	0.449	5.1	1.3	82	13985.4
112	27.5	14.8092	1680.67	234	17.5	0.309	4.8	1.25	200	13985.4
110.5	26.5	14.8953	1638.15	159	14	0.2545	4.9	1.43	198	13985.4
112	26.5	16.8554	1501.06	243	20.3	0.173	5.1	1.3	168	13985.4
112	26.5	16.8554	1501.06	243	20.3	0.173	5.1	1.3	162	13985.4
112	26.5	16.8554	1501.06	243	20.3	0.173	5.1	1.3	130	13985.4
125	44	5.92284	449.64	252	27.3	0.218	6.4	1.3	68	13978.8
123.5	44	6.98189	410.95	135	41.3	0.144	6.3	1.27	12	13978.8
114	36	14.491	747.29	327	8.4	0.179	6.5	1.44	334	13978.8
103.5	30	13.3418	959.63	324	16.1	0.313	7.8	1.41	176	13978.8
104.5	29	18.2227	844.05	204	20.3	0.202	5.1	1.3	118	13978.8
120	29	17.5166	1513.24	138	33.6	0.183	5.9	1.4	204	13978.8
110.5	27.5	15.7999	1429.81	153	25.2	0.197	5	1.31	66	13978.8
108.5	35	12.9286	568.72	282	9.1	0.24	8	1.41	88	13972.2
108.5	35	12.9286	568.72	282	9.1	0.24	8	1.41	154	13972.2
103.5	30	13.3418	959.63	324	10.5	0.168	8	1.37	236	13972.2
111.5	27.5	16.2657	1463.65	168	14	0.259	4.9	1.43	162	13972.2
111.5	27.5	16.2657	1463.65	168	14	0.259	4.9	1.43	178	13972.2
116.5	33	16.3049	1054	360	21	0.239	6.7	1.29	92	13965.6
104.5	30	16.8197	840.9	312	20.3	0.342	5.1	1.3	84	13965.6
113.5	30	17.6377	1262.91	258	32.2	0.251	6.1	1.22	294	13965.6
125	44	5.92284	449.64	252	41.3	0.287	6.3	1.27	46	13959
115.5	39	14.0196	312.74	366	11.9	0.128	6.3	1.54	354	13959
116.5	36	13.5042	586.62	378	10.5	0.253	8	1.37	260	13959
117	33	16.4751	1009.46	351	21	0.239	6.7	1.29	70	13959
104	30	15.0266	852.12	333	10.5	0.129	8	1.37	134	13959
114	36	14.491	747.29	327	8.4	0.179	6.5	1.44	278	13952.4
105.5	29.5	18.0515	928.13	216	20.3	0.1855	5.1	1.3	140	13952.4
114.5	35.5	15.0289	629.26	384	9.1	0.147	8	1.41	188	13945.8
114.5	35.5	15.0289	629.26	372	5.6	0.227	8.3	1.4	236	13945.8
114.5	35.5	15.0289	629.26	372	5.6	0.227	8.3	1.4	218	13945.8
104.5	29.5	17.6058	826.59	312	20.3	0.449	5.1	1.3	82	13945.8
104.5	29	18.2227	844.05	204	20.3	0.17	5.1	1.3	132	13945.8
104.5	29	18.2227	844.05	204	20.3	0.17	5.1	1.3	134	13945.8
112.5	29	17.5684	1342.91	228	32.2	0.132	6.1	1.22	286	13945.8
112	28	15.5633	1573.88	210	17.5	0.198	4.8	1.25	190	13945.8
125	44	5.92284	449.64	252	41.3	0.287	6.3	1.27	42	13939.2
125	44	5.92284	449.64	252	41.3	0.27	6.3	1.27	44	13939.2
125	44	5.92284	449.64	252	41.3	0.27	6.3	1.27	44	13939.2
104	30	15.0266	852.12	333	10.5	0.129	8	1.37	140	13939.2
105.5	29	17.656	999.29	216	20.3	0.202	5.1	1.3	132	13939.2
105.5	29	17.656	999.29	216	20.3	0.202	5.1	1.3	130	13939.2
105.5	29	17.656	999.29	216	20.3	0.1855	5.1	1.3	138	13939.2
112	27	16.2865	1546.48	213	17.5	0.253	4.8	1.25	174	13939.2
109	25.5	19.1786	1732.21	27	42.7	0.191	4.8	1.27	24	13939.2
116	36.5	12.9069	586.51	396	5.6	0.153	8.2	1.48	346	13932.6
114	36	14.491	747.29	327	8.4	0.179	6.5	1.44	334	13932.6
110.5	35	13.8158	549.11	249	5.6	0.209	8.2	1.48	118	13932.6
116.5	33	16.3049	1054	360	21	0.223	6.7	1.29	98	13932.6
104	31	16.9402	788.12	345	10.5	0.129	8	1.37	170	13932.6
103.5	30	13.3418	959.63	324	16.1	0.313	7.8	1.41	156	13932.6
103.5	29.5	12.2262	913.82	222	20.3	0.17	5.1	1.3	114	13932.6
111.5	27.5	16.2657	1463.65	168	14	0.259	4.9	1.43	144	13932.6
111.5	27.5	16.2657	1463.65	168	14	0.259	4.9	1.43	148	13932.6
106	27	14.2502	1341.35	177	20.3	0.219	5.1	1.3	44	13932.6
111.5	27.5	16.2657	1463.65	168	14	0.259	4.9	1.43	160	13932.6
100.5	23.5	21.313	1348.24	30	16.1	0.248	7.8	1.41	26	13932.6
124	43	7.11007	527.49	210	41.3	0.2645	6.3	1.27	20	13926
112.5	35	14.8569	685.57	288	8.4	0.179	6.5	1.44	260	13926
112.5	35	14.8569	685.57	288	8.4	0.179	6.5	1.44	276	13926
112.5	35	14.8569	685.57	288	8.4	0.179	6.5	1.44	296	13926
116.5	33	16.3049	1054	360	21	0.239	6.7	1.29	126	13926
104.5	29.5	17.6058	826.59	312	20.3	0.449	5.1	1.3	76	13926
105.5	29.5	18.0515	928.13	216	20.3	0.202	5.1	1.3	160	13926
105.5	29.5	18.0515	928.13	216	20.3	0.211	5.1	1.3	166	13926
105.5	29.5	18.0515	928.13	216	20.3	0.211	5.1	1.3	152	13926
106	29	15.9724	1054.19	231	20.3	0.202	5.1	1.3	84	13926
106	29	15.9724	1054.19	231	20.3	0.202	5.1	1.3	84	13926
120	29	17.5166	1513.24	138	33.6	0.152	5.9	1.4	164	13926
113	33	15.6487	1350.76	282	14.7	0.25	5.6	1.47	88	13919.4
105.5	29	17.656	999.29	216	20.3	0.202	5.1	1.3	140	13919.4
104.5	29	18.2227	844.05	204	20.3	0.17	5.1	1.3	124	13919.4
104.5	29	18.2227	844.05	204	20.3	0.17	5.1	1.3	136	13919.4
104.5	29	18.2227	844.05	204	20.3	0.17	5.1	1.3	138	13919.4
105.5	29	17.656	999.29	216	20.3	0.202	5.1	1.3	114	13919.4
104.5	28.5	17.0648	954.16	204	20.3	0.17	5.1	1.3	98	13919.4
104.5	29	18.2227	844.05	204	20.3	0.17	5.1	1.3	138	13919.4
114	36	14.491	747.29	327	8.4	0.179	6.5	1.44	356	13912.8
104	31	16.9402	788.12	345	10.5	0.129	8	1.37	168	13912.8
104	30	15.0266	852.12	333	10.5	0.129	8	1.37	138	13912.8
112	28	15.5633	1573.88	210	17.5	0.198	4.8	1.25	262	13912.8
115	27.5	18.5036	1493.6	264	14	0.146	4.9	1.43	190	13912.8
111.5	27	17.0704	1399.42	195	17.5	0.253	4.8	1.25	134	13912.8
83	41	12.4274	43.43	24	41.3	0.12	6.3	1.27	48	13906.2
116.5	35.5	14.4793	606.08	378	10.5	0.153	6.5	1.43	338	13906.2
116.5	35.5	14.4793	606.08	378	10.5	0.153	6.5	1.43	338	13906.2
103.5	30	13.3418	959.63	324	16.1	0.313	7.8	1.41	178	13906.2
125	44	5.92284	449.64	252	41.3	0.311	6.3	1.27	36	13899.6
105.5	29	17.656	999.29	216	20.3	0.202	5.1	1.3	142	13899.6
112	27.5	14.8092	1680.67	234	14	0.338	4.9	1.43	178	13899.6
116.5	36	13.5042	586.62	378	10.5	0.253	8	1.37	50	13893
116.5	36	13.5042	586.62	378	5.6	0.253	8.2	1.48	302	13893
104.5	28.5	17.0648	954.16	204	20.3	0.17	5.1	1.3	154	13893
104.5	28.5	17.0648	954.16	204	20.3	0.17	5.1	1.3	148	13893
111.5	27.5	16.2657	1463.65	168	14	0.259	4.9	1.43	166	13893
100	23	21.1885	1329.48	27	14	0.248	5.2	1.4	24	13893
104.5	29.5	17.6058	826.59	312	20.3	0.449	5.1	1.3	72	13886.4
112	29	17.5379	1314.96	315	16.1	0.212	7.8	1.41	360	13886.4
103.5	23.5	17.2897	1217.2	45	17.5	0.434	4.8	1.25	36	13886.4
113.5	35	15.2951	680.46	312	9.1	0.2	8	1.41	336	13879.8
104.5	31	17.0101	785.74	255	16.1	0.248	7.8	1.41	146	13879.8
103.5	30	13.3418	959.63	324	16.1	0.313	7.8	1.41	152	13879.8
112	28	15.5633	1573.88	210	17.5	0.197	4.8	1.25	198	13879.8
111.5	27.5	16.2657	1463.65	168	17.5	0.259	4.8	1.25	162	13879.8
104	30	15.0266	852.12	333	10.5	0.129	8	1.37	148	13873.2
112	28.5	16.5522	1485.87	255	14.7	0.212	6.2	1.355	276	13873.2
103	23.5	19.3576	1065.52	45	16.1	0.303	7.8	1.41	26	13873.2
114.5	35	15.4769	694.38	372	5.6	0.232	8.3	1.4	342	13866.6
115.5	32.5	16.5783	1085.66	366	14.7	0.239	5.6	1.47	100	13866.6
115.5	32.5	16.5783	1085.66	366	14.7	0.239	5.6	1.47	104	13866.6
115.5	32.5	16.5783	1085.66	366	14.7	0.239	5.6	1.47	108	13866.6
119	32	15.0025	120.01	294	16.1	0.17	7.8	1.41	306	13866.6
106	29	15.9724	1054.19	231	20.3	0.202	5.1	1.3	92	13866.6
124.5	44	6.29594	454.55	195	32.2	0.075	6.1	1.22	24	13860
107.5	27.5	15.5639	1252.27	156	15.4	0.142	4.8	1.21	38	13860
115	32.5	16.5285	1117.29	423	14	0.213	6.3	1.28	162	13853.4
115	32.5	16.5285	1117.29	423	14	0.213	6.3	1.28	182	13853.4
115	32.5	16.5285	1117.29	423	14	0.213	8	1.41	132	13853.4
112	31.5	16.8079	1038.17	231	20.3	0.214	5.1	1.3	112	13853.4
112	31.5	16.8079	1038.17	231	20.3	0.214	5.1	1.3	108	13853.4
104	30	15.0266	852.12	333	10.5	0.129	8	1.37	152	13853.4
105.5	29	17.656	999.29	216	20.3	0.202	5.1	1.3	148	13853.4
112	28	15.5633	1573.88	210	17.5	0.198	4.8	1.25	252	13853.4
124	44.5	5.76848	426.45	126	41.3	0.161	6.3	1.27	16	13846.8
124	44.5	5.76848	426.45	126	41.3	0.161	6.3	1.27	20	13846.8
116	36	13.7287	545.65	372	9.1	0.24	8	1.41	160	13846.8
116	36	13.7287	545.65	372	9.1	0.24	8	1.41	186	13846.8
116	36	13.7287	545.65	372	9.1	0.24	8	1.41	224	13846.8
113.5	35	15.2951	680.46	312	9.1	0.2	8	1.41	270	13846.8
113.5	35	15.2951	680.46	312	9.1	0.2	8	1.41	276	13846.8
104.5	29.5	17.6058	826.59	312	20.3	0.449	5.1	1.3	82	13846.8
112	27	16.2865	1546.48	213	17.5	0.205	4.8	1.25	176	13846.8
110.5	35	13.8158	549.11	249	5.6	0.209	8.2	1.48	174	13840.2
114.5	33.5	15.7626	1264.19	474	14	0.276	8	1.41	338	13840.2
105.5	29.5	18.0515	928.13	216	20.3	0.211	5.1	1.3	164	13840.2
111.5	27	17.0704	1399.42	195	14	0.219	4.9	1.43	146	13840.2
101.5	22.5	20.9596	1871.59	0	25.2	0.206	5	1.31	30	13840.2
116	36	13.7287	545.65	372	9.1	0.253	8	1.41	230	13833.6
115.5	32.5	16.5783	1085.66	366	14.7	0.239	5.6	1.47	138	13833.6
115.5	32.5	16.5783	1085.66	366	14.7	0.239	5.6	1.47	124	13833.6
115.5	32.5	16.5783	1085.66	366	14.7	0.239	5.6	1.47	128	13833.6
115.5	32.5	16.5783	1085.66	366	14.7	0.239	5.6	1.47	150	13833.6
112	32	16.903	1039.35	255	21	0.244	6.7	1.29	62	13833.6
103.5	30	13.3418	959.63	324	10.5	0.168	8	1.37	204	13827
104.5	29.5	17.6058	826.59	312	20.3	0.449	5.1	1.3	84	13827
107.5	27.5	15.5639	1252.27	156	15.4	0.142	4.8	1.21	40	13827
108	27.5	15.4513	1226.21	105	20.3	0.2	5.1	1.3	42	13827
101	25	18.1525	999.25	36	20.3	0.205	5.1	1.3	82	13827
82.5	41.5	12.3641	43.24	69	33.6	0.155	5.9	1.4	172	13820.4
116	37	13.4787	615.01	396	8.4	0.187	8	1.39	332	13820.4
115.5	32.5	16.5783	1085.66	366	14.7	0.239	5.6	1.47	166	13820.4
115.5	32.5	16.5783	1085.66	366	14.7	0.239	5.6	1.47	160	13820.4
112	28	15.5633	1573.88	210	17.5	0.205	4.8	1.25	188	13820.4
112	28	15.5633	1573.88	210	17.5	0.198	4.8	1.25	212	13820.4
100.5	25.5	16.6049	1012.01	60	20.3	0.176	6.8	1.23	46	13820.4
116	32.5	16.6124	1080.78	402	16.1	0.112	4.5	1.38	170	13813.8
119	29	16.661	1600.3	198	42.7	0.369	4.8	1.27	142	13813.8
109	27	16.3848	1332.71	81	25.2	0.197	5	1.31	32	13813.8
114.5	35.5	15.0289	629.26	372	18.2	0.039	7	1.31	168	13807.2
114.5	33.5	15.7626	1264.19	474	14	0.287	8	1.41	360	13807.2
114.5	33.5	15.7626	1264.19	474	14	0.287	8	1.41	352	13807.2
104.5	29.5	17.6058	826.59	312	20.3	0.449	5.1	1.3	86	13807.2
105.5	29	17.656	999.29	216	20.3	0.211	5.1	1.3	154	13807.2
108.5	27	15.4811	1327.54	57	25.2	0.197	5	1.31	48	13807.2
111.5	27	17.0704	1399.42	195	14	0.191	4.9	1.43	156	13807.2
111.5	27	17.0704	1399.42	195	14	0.191	4.9	1.43	154	13807.2
111	35.5	13.4626	486.15	216	9.1	0.244	8	1.41	126	13800.6
111	35.5	13.4626	486.15	216	9.1	0.244	8	1.41	126	13800.6
114.5	32.5	16.3401	1211.42	402	16.1	0.112	4.5	1.38	184	13800.6
114.5	32.5	16.3401	1211.42	402	16.1	0.112	4.5	1.38	188	13800.6
116	32.5	16.6124	1080.78	402	16.1	0.112	4.5	1.38	180	13800.6
114.5	32.5	16.3401	1211.42	402	16.1	0.112	4.5	1.38	192	13800.6
99.5	24	19.6909	1389.99	60	17.5	0.321	4.8	1.25	14	13800.6
103.5	29.5	12.2262	913.82	222	14.7	0.268	6.2	1.355	140	13794
106	29	15.9724	1054.19	231	20.3	0.202	5.1	1.3	128	13794
119	29	16.661	1600.3	198	42.7	0.369	4.8	1.27	136	13794
110.5	35	13.8158	549.11	249	5.6	0.209	8.2	1.48	144	13787.4
109.5	34.5	9.59503	768.67	318	5.6	0.217	8.3	1.4	128	13787.4
109.5	34.5	9.59503	768.67	318	18.2	0.17	7	1.31	164	13787.4
114.5	33.5	15.7626	1264.19	474	14	0.287	8	1.41	356	13787.4
114.5	33.5	15.7626	1264.19	474	14	0.287	8	1.41	218	13787.4
114.5	32.5	16.3401	1211.42	402	16.1	0.112	4.5	1.38	220	13787.4
104	30	15.0266	852.12	333	10.5	0.129	8	1.37	152	13787.4
105.5	29	17.656	999.29	216	20.3	0.211	5.1	1.3	158	13787.4
118	29.5	15.3734	1627.25	72	42.7	0.264	4.8	1.27	108	13787.4
108	27.5	15.4513	1226.21	105	20.3	0.2	5.1	1.3	52	13787.4
108	27.5	15.4513	1226.21	105	20.3	0.2	5.1	1.3	50	13787.4
124	45	5.51362	391.13	126	41.3	0.161	6.3	1.27	16	13780.8
111	35.5	13.4626	486.15	216	9.1	0.209	8	1.41	126	13780.8
118.5	34.5	15.484	1070.76	363	21	0.198	6.7	1.29	348	13774.2
118.5	34.5	15.484	1070.76	363	21	0.198	6.7	1.29	346	13774.2
116	32.5	16.6124	1080.78	402	16.1	0.112	4.5	1.38	182	13774.2
116	32.5	16.6124	1080.78	402	16.1	0.112	4.5	1.38	186	13774.2
114.5	32.5	16.3401	1211.42	402	16.1	0.112	4.5	1.38	222	13774.2
114.5	33.5	15.7626	1264.19	474	14	0.287	8	1.41	210	13767.6
117	30	16.2359	1571.03	99	42.7	0.264	4.8	1.27	222	13767.6
105.5	29	17.656	999.29	216	20.3	0.211	5.1	1.3	180	13767.6
104	30	15.0266	852.12	333	10.5	0.129	8	1.37	156	13761
104	30	15.0266	852.12	333	10.5	0.129	8	1.37	154	13761
104.5	29.5	17.6058	826.59	312	20.3	0.449	5.1	1.3	74	13761
114.5	35.5	15.0289	629.26	384	8.4	0.15	8	1.39	336	13754.4
112	31.5	16.8079	1038.17	231	20.3	0.214	5.1	1.3	102	13754.4
112	27	16.2865	1546.48	213	17.5	0.253	4.8	1.25	162	13754.4
114.5	35.5	15.0289	629.26	384	8.4	0.187	8	1.39	224	13747.8
114.5	35.5	15.0289	629.26	384	8.4	0.187	8	1.39	252	13747.8
114.5	33.5	15.7626	1264.19	474	14	0.287	8	1.41	274	13747.8
114.5	33.5	15.7626	1264.19	474	14	0.287	8	1.41	256	13747.8
103	23	20.6213	1689.94	45	19.6	0.466	6.6	1.34	38	13747.8
114.5	35.5	15.0289	629.26	384	8.4	0.187	8	1.39	344	13741.2
108	34	9.3702	878.65	327	9.1	0.201	8	1.41	344	13741.2
104	30	15.0266	852.12	333	10.5	0.129	8	1.37	156	13741.2
104	30	15.0266	852.12	333	10.5	0.129	8	1.37	154	13741.2
105.5	29	17.656	999.29	216	20.3	0.202	5.1	1.3	164	13741.2
99.5	23.5	19.678	1540.49	48	17.5	0.321	4.8	1.33	18	13741.2
114.5	35.5	15.0289	629.26	384	8.4	0.147	8	1.39	260	13734.6
104.5	31	17.0101	785.74	255	16.1	0.248	4.9	1.19	118	13734.6
117	30	16.2359	1571.03	99	42.7	0.264	4.8	1.27	184	13734.6
117	30	16.2359	1571.03	99	42.7	0.264	4.8	1.27	166	13734.6
117	30	16.2359	1571.03	99	42.7	0.264	4.8	1.27	116	13734.6
118	29.5	15.3734	1627.25	72	42.7	0.264	4.8	1.27	98	13734.6
111	35.5	13.4626	486.15	216	9.1	0.231	8	1.41	94	13728
111	35.5	13.4626	486.15	216	9.1	0.193	8	1.41	178	13728
113.5	35	15.2951	680.46	312	5.6	0.263	8.2	1.48	342	13728
126	45.5	4.80709	464.33	243	30.1	0.236	6.9	1.355	22	13721.4
111	35.5	13.4626	486.15	216	9.1	0.244	8	1.41	120	13714.8
110.5	35.5	14.0945	471.44	249	9.1	0.147	8	1.41	62	13714.8
110.5	35.5	14.0945	471.44	249	9.1	0.147	8	1.41	24	13714.8
110.5	35.5	14.0945	471.44	249	9.1	0.147	8	1.41	62	13714.8
108	34	9.3702	878.65	327	9.1	0.201	8	1.41	344	13714.8
115.5	33	16.0601	1273.39	417	14	0.249	8	1.41	88	13714.8
112.5	32	16.4466	1097.43	300	20.3	0.214	5.1	1.3	168	13714.8
104	29	16.1391	823.89	186	20.3	0.17	5.1	1.3	104	13714.8
103	23	20.6213	1689.94	45	19.6	0.466	6.6	1.34	38	13714.8
115	33	16.0299	1244.62	423	14	0.249	8	1.41	86	13708.2
104	29	16.1391	823.89	186	20.3	0.202	5.1	1.3	74	13701.6
114	29	16.5352	1548.39	60	42.7	0.177	4.8	1.27	28	13701.6
114	29	16.5352	1548.39	60	42.7	0.177	4.8	1.27	16	13701.6
114	29	16.5352	1548.39	60	42.7	0.177	4.8	1.27	22	13701.6
111	35.5	13.4626	486.15	216	9.1	0.193	8	1.41	156	13695
110.5	35.5	14.0945	471.44	249	9.1	0.147	8	1.41	34	13695
110.5	35.5	14.0945	471.44	249	9.1	0.147	8	1.41	46	13695
114.5	33.5	15.7626	1264.19	468	14	0.287	8	1.41	360	13695
114	32.5	15.9741	1357.97	324	16.1	0.213	4.5	1.38	56	13695
112	31.5	16.8079	1038.17	231	20.3	0.214	5.1	1.3	142	13695
106	30	18.2604	1002.63	276	20.3	0.267	5.1	1.3	110	13695
106	29	15.9724	1054.19	231	20.3	0.1855	5.1	1.3	88	13695
107.5	27.5	15.5639	1252.27	156	30.1	0.304	7.5	1.24	44	13695
101	25	18.1525	999.25	36	20.3	0.205	5.1	1.3	40	13695
100	23.5	21.2915	1347.08	42	17.5	0.31	4.8	1.33	22	13695
122.5	44	6.97654	322.36	78	41.3	0.075	6.3	1.27	12	13688.4
113	33	15.6487	1350.76	282	14.7	0.25	5.6	1.47	114	13688.4
114.5	32.5	16.3401	1211.42	402	16.1	0.112	4.5	1.38	118	13688.4
114.5	32.5	16.3401	1211.42	402	16.1	0.112	4.5	1.38	122	13688.4
120	30.5	17.5642	1267.23	360	16.1	0.25	7.8	1.41	364	13688.4
116.5	32.5	16.7003	1010.9	360	21	0.239	6.7	1.29	226	13681.8
111.5	32.5	16.3772	1001.27	300	14.7	0.326	5.6	1.47	122	13681.8
116.5	32.5	16.7003	1010.9	360	21	0.239	6.7	1.29	178	13681.8
112	31.5	16.8079	1038.17	231	20.3	0.211	5.1	1.3	146	13681.8
103.5	30	13.3418	959.63	324	8.4	0.168	8	1.39	180	13681.8
106	29	15.9724	1054.19	231	20.3	0.1855	5.1	1.3	74	13681.8
108.5	27	15.4811	1327.54	57	25.2	0.197	5	1.31	42	13681.8
111	35.5	13.4626	486.15	216	9.1	0.193	8	1.41	134	13675.2
111	35.5	13.4626	486.15	216	9.1	0.193	8	1.41	150	13675.2
111	35.5	13.4626	486.15	216	9.1	0.193	8	1.41	126	13675.2
114.5	35	15.4769	694.38	366	5.6	0.232	8.3	1.4	182	13675.2
114.5	33.5	15.7626	1264.19	468	14	0.287	8	1.41	324	13675.2
104	30	15.0266	852.12	333	10.5	0.129	8	1.37	158	13675.2
111	27.5	16.7956	1363.13	195	16.1	0.147	4.9	1.19	98	13675.2
99.5	23.5	19.678	1540.49	48	17.5	0.321	4.8	1.33	20	13675.2
114.5	33	15.9995	1295.27	468	14.7	0.287	6.9	1.56	258	13668.6
115.5	33	16.0601	1273.39	417	14	0.249	8	1.41	112	13668.6
116.5	32.5	16.7003	1010.9	360	21	0.239	6.7	1.29	270	13668.6
106	30	18.2604	1002.63	276	20.3	0.267	5.1	1.3	120	13662
114.5	33.5	15.7626	1264.19	468	14	0.287	8	1.41	238	13655.4
115	33	16.0299	1244.62	423	14	0.25	6.3	1.28	60	13655.4
111.5	32.5	16.3772	1001.27	300	14.7	0.326	5.6	1.47	96	13655.4
111.5	32.5	16.3772	1001.27	300	14.7	0.326	5.6	1.47	102	13655.4
111.5	32.5	16.3772	1001.27	300	14.7	0.326	5.6	1.47	110	13655.4
111.5	32.5	16.3772	1001.27	300	14.7	0.326	5.6	1.47	134	13655.4
115.5	28.5	18.3698	1431.18	267	17.5	0.2245	4.8	1.25	286	13655.4
125	44.5	5.70634	425.42	252	41.3	0.27	6.3	1.27	38	13648.8
115	36.5	14.0428	578.09	402	18.2	0.039	7	1.31	278	13648.8
109.5	34.5	9.59503	768.67	318	16.1	0.147	7.8	1.41	106	13648.8
109.5	34.5	9.59503	768.67	318	16.1	0.147	7.8	1.41	104	13648.8
111.5	32.5	16.3772	1001.27	300	14.7	0.326	5.6	1.47	72	13642.2
111.5	32.5	16.3772	1001.27	300	14.7	0.326	5.6	1.47	136	13642.2
112	31.5	16.8079	1038.17	231	20.3	0.211	5.1	1.3	140	13642.2
103.5	30	13.3418	959.63	324	10.5	0.168	8	1.37	182	13642.2
104	29	16.1391	823.89	186	20.3	0.17	5.1	1.3	98	13642.2
112	27.5	14.8092	1680.67	234	16.1	0.205	7.8	1.41	194	13642.2
112	27.5	14.8092	1680.67	234	16.1	0.259	7.8	1.41	180	13642.2
108.5	27	15.4811	1327.54	57	25.2	0.197	5	1.31	36	13642.2
125	44.5	5.70634	425.42	252	41.3	0.295	6.3	1.27	38	13635.6
109.5	34.5	9.59503	768.67	318	16.1	0.147	7.8	1.41	104	13635.6
112.5	32	16.4466	1097.43	300	20.3	0.202	5.1	1.3	148	13635.6
104.5	29.5	17.6058	826.59	312	20.3	0.449	5.1	1.3	86	13635.6
104.5	29.5	17.6058	826.59	312	20.3	0.449	5.1	1.3	74	13635.6
107.5	27.5	15.5639	1252.27	156	16.1	0.223	7.8	1.41	46	13635.6
113.5	35	15.2951	680.46	312	8.4	0.2	8	1.39	288	13629
117.5	39.5	13.2338	425.98	291	21	0.25	6.7	1.29	272	13622.4
115	37	14.2564	646.56	411	9.1	0.157	8	1.41	288	13622.4
115	37	14.2564	646.56	411	9.1	0.157	8	1.41	274	13622.4
107	30	17.5142	1105.9	336	20.3	0.121	5.1	1.3	94	13622.4
106	29	15.9724	1054.19	231	20.3	0.1855	5.1	1.3	122	13622.4
118	29.5	15.3734	1627.25	72	42.7	0.264	4.8	1.27	98	13622.4
112	27.5	14.8092	1680.67	234	16.1	0.197	7.8	1.41	180	13622.4
104.5	23.5	19.2501	1150.71	69	42.7	0.459	4.8	1.27	36	13622.4
115	37	14.2564	646.56	411	9.1	0.157	8	1.41	260	13615.8
104.5	29.5	17.6058	826.59	312	20.3	0.449	5.1	1.3	76	13615.8
104	29	16.1391	823.89	186	20.3	0.17	5.1	1.3	100	13615.8
117.5	39.5	13.2338	425.98	291	21	0.25	6.7	1.29	264	13609.2
117.5	39.5	13.2338	425.98	291	21	0.25	6.7	1.29	262	13609.2
117.5	39.5	13.2338	425.98	291	21	0.25	6.7	1.29	266	13609.2
115	37	14.2564	646.56	411	9.1	0.157	8	1.41	274	13609.2
109.5	34.5	9.59503	768.67	318	16.1	0.164	7.8	1.41	154	13609.2
104	30	15.0266	852.12	333	10.5	0.129	8	1.37	176	13609.2
104.5	29	18.2227	844.05	237	16.1	0.157	4.9	1.19	124	13609.2
104.5	29	18.2227	844.05	237	16.1	0.157	4.9	1.19	126	13609.2
104.5	29	18.2227	844.05	237	16.1	0.157	4.9	1.19	124	13609.2
110.5	26.5	14.8953	1638.15	159	17.5	0.197	4.8	1.25	186	13609.2
125	44	5.92284	449.64	252	23.1	0.075	6.6	1.28	42	13602.6
104.5	29	18.2227	844.05	237	16.1	0.202	7.8	1.41	116	13602.6
104.5	29	18.2227	844.05	237	16.1	0.202	7.8	1.41	116	13602.6
108.5	27	15.4811	1327.54	57	25.2	0.197	5	1.31	58	13602.6
126	46	4.75135	432.24	258	41.3	0.27	6.3	1.27	12	13596
126	46	4.75135	432.24	258	41.3	0.27	6.3	1.27	14	13596
117.5	39.5	13.2338	425.98	291	21	0.25	6.7	1.29	226	13596
117.5	39.5	13.2338	425.98	291	21	0.25	6.7	1.29	230	13596
117.5	39.5	13.2338	425.98	291	21	0.25	6.7	1.29	246	13596
117.5	39.5	13.2338	425.98	291	21	0.25	6.7	1.29	238	13596
104	30	15.0266	852.12	333	20.3	0.425	5.1	1.3	182	13596
111.5	28.5	15.9627	1480.38	261	16.1	0.236	7.8	1.41	312	13596
124.5	44	6.29594	454.55	195	30.1	0.075	6.9	1.355	40	13589.4
115	37	14.2564	646.56	411	9.1	0.157	8	1.41	278	13589.4
115	37	14.2564	646.56	411	9.1	0.157	8	1.41	196	13589.4
115.5	36.5	13.685	525.64	390	9.1	0.153	8	1.41	322	13589.4
112	32.5	16.7532	1050	378	14	0.31	6.6	1.37	252	13589.4
104.5	30	16.8197	840.9	312	20.3	0.449	5.1	1.3	98	13589.4
112	29.5	17.6252	1182.27	321	16.1	0.212	7.8	1.41	264	13589.4
104.5	29	18.2227	844.05	237	16.1	0.202	7.8	1.41	118	13589.4
112	29.5	17.6252	1182.27	321	16.1	0.212	7.8	1.41	304	13589.4
112	29.5	17.6252	1182.27	321	16.1	0.212	7.8	1.41	346	13589.4
112	29.5	17.6252	1182.27	321	16.1	0.212	7.8	1.41	336	13589.4
112	29.5	17.6252	1182.27	321	16.1	0.212	7.8	1.41	298	13589.4
112	29.5	17.6252	1182.27	321	16.1	0.212	7.8	1.41	358	13589.4
112	29.5	17.6252	1182.27	321	16.1	0.212	7.8	1.41	310	13589.4
99.5	25.5	16.7525	1210.36	24	7.7	0.173	4.8	1.44	24	13589.4
117.5	33	16.4014	1010.2	333	21	0.25	6.7	1.29	158	13582.8
112.5	32	16.4466	1097.43	300	20.3	0.214	5.1	1.3	68	13582.8
112	29.5	17.6252	1182.27	321	16.1	0.212	7.8	1.41	360	13582.8
111.5	28.5	15.9627	1480.38	261	16.1	0.198	7.8	1.41	318	13582.8
102.5	23	20.2953	1553.96	36	14	0.129	6.6	1.31	26	13582.8
126	46	4.75135	432.24	258	27.3	0.233	6.4	1.3	22	13576.2
115.5	36.5	13.685	525.64	390	9.1	0.153	8	1.41	272	13576.2
115.5	36.5	13.685	525.64	390	9.1	0.157	8	1.41	290	13576.2
126	46	4.75135	432.24	258	41.3	0.27	6.3	1.27	12	13569.6
115	37	14.2564	646.56	411	9.1	0.157	8	1.41	218	13569.6
115	37	14.2564	646.56	411	6.3	0.146	6.7	1.4	224	13569.6
115	37	14.2564	646.56	411	9.1	0.157	8	1.41	154	13569.6
116.5	32.5	16.7003	1010.9	360	19.6	0.239	5.1	1.27	238	13569.6
112	26.5	16.8554	1501.06	243	17.5	0.173	4.8	1.25	158	13569.6
126	46	4.75135	432.24	258	41.3	0.27	6.3	1.27	12	13563
117	37	13.1417	686.88	354	5.6	0.25	7.9	1.36	362	13563
116.5	32.5	16.7003	1010.9	360	19.6	0.239	5.1	1.27	266	13563
116.5	32.5	16.7003	1010.9	360	19.6	0.239	5.1	1.27	274	13563
104	30	15.0266	852.12	255	10.5	0.268	8	1.37	110	13563
104	30	15.0266	852.12	255	10.5	0.268	8	1.37	112	13563
120	29	17.5166	1513.24	138	42.7	0.296	4.8	1.27	120	13563
100.5	25.5	16.6049	1012.01	60	14	0.278	6.6	1.37	42	13563
125.5	45	5.03963	432.19	237	34.3	0.236	7.2	1.23	56	13556.4
115	37	14.2564	646.56	411	9.1	0.157	8	1.41	336	13556.4
115	37	14.2564	646.56	411	9.1	0.146	8	1.41	350	13556.4
115	37	14.2564	646.56	411	9.1	0.157	8	1.41	166	13556.4
115	37	14.2564	646.56	411	9.1	0.157	8	1.41	210	13556.4
114	35.5	15.329	667.49	339	9.1	0.244	8	1.41	310	13556.4
108	34	9.3702	878.65	327	8.4	0.22	8	1.39	296	13556.4
115.5	34	15.954	1143.53	465	8.4	0.153	8	1.39	340	13556.4
112	32.5	16.7532	1050	378	14	0.31	6.6	1.37	238	13556.4
112	27.5	14.8092	1680.67	234	16.1	0.259	7.8	1.41	154	13556.4
108.5	27	15.4811	1327.54	57	25.2	0.197	5	1.31	54	13556.4
126	46	4.75135	432.24	258	27.3	0.233	6.4	1.3	26	13549.8
113.5	34.5	15.5587	802.91	420	8.4	0.102	8	1.39	320	13549.8
108	34	9.3702	878.65	327	6.3	0.2545	7.7	1.3	334	13549.8
108	34	9.3702	878.65	327	9.1	0.221	8	1.41	324	13549.8
104.5	30	16.8197	840.9	312	20.3	0.449	5.1	1.3	94	13549.8
104.5	29.5	17.6058	826.59	312	20.3	0.449	5.1	1.3	84	13549.8
112	29.5	17.6252	1182.27	321	16.1	0.251	7.8	1.41	338	13549.8
104	23.5	17.8668	1216.85	39	42.7	0.44	4.8	1.27	40	13549.8
117	37	13.1417	686.88	354	5.6	0.25	8.3	1.4	334	13543.2
112	29.5	17.6252	1182.27	321	16.1	0.212	7.8	1.41	232	13543.2
104	29	16.1391	823.89	186	20.3	0.17	5.1	1.3	86	13543.2
112	29.5	17.6252	1182.27	321	16.1	0.2545	7.8	1.41	316	13543.2
104	29	16.1391	823.89	186	20.3	0.17	5.1	1.3	90	13543.2
106.5	27.5	15.5309	1265.94	132	30.1	0.257	7.5	1.24	26	13543.2
101.5	23.5	20.9225	1270.25	39	17.5	0.434	4.8	1.25	14	13543.2
126	46	4.75135	432.24	258	41.3	0.27	6.3	1.27	10	13536.6
120	29	17.5166	1513.24	138	42.7	0.296	4.8	1.27	122	13536.6
126	46	4.75135	432.24	258	27.3	0.236	6.4	1.3	22	13530
126	45	4.90795	484.82	243	30.1	0.236	6.9	1.355	22	13530
126	45	4.90795	484.82	243	30.1	0.236	6.9	1.355	24	13530
113.5	34.5	15.5587	802.91	420	8.4	0.102	8	1.39	314	13530
104.5	29.5	17.6058	826.59	312	20.3	0.449	5.1	1.3	78	13530
104.5	29	18.2227	844.05	237	16.1	0.202	7.8	1.41	130	13530
111.5	27.5	16.2657	1463.65	168	14	0.205	4.8	1.29	136	13530
111.5	27.5	16.2657	1463.65	168	14	0.205	4.8	1.29	142	13530
112	27	16.2865	1546.48	243	16.1	0.205	7.8	1.41	162	13530
115.5	37	13.8443	587.07	390	9.1	0.157	8	1.41	236	13523.4
116.5	35.5	14.4793	606.08	378	11.9	0.1	6.3	1.54	282	13523.4
114.5	32.5	16.3401	1211.42	402	14	0.213	6.3	1.28	172	13523.4
119	32	15.0025	120.01	294	14.7	0.21	5.6	1.47	194	13523.4
106	30	18.2604	1002.63	276	20.3	0.267	5.1	1.3	124	13523.4
106	30	18.2604	1002.63	276	20.3	0.267	5.1	1.3	130	13523.4
112	29.5	17.6252	1182.27	321	16.1	0.2545	7.8	1.41	306	13523.4
126	46	4.75135	432.24	258	27.3	0.233	6.4	1.3	32	13516.8
126	45	4.90795	484.82	243	30.1	0.236	6.9	1.355	20	13516.8
126	45	4.90795	484.82	243	30.1	0.236	6.9	1.355	24	13516.8
126	45	4.90795	484.82	243	30.1	0.236	6.9	1.355	24	13516.8
126	45	4.90795	484.82	243	30.1	0.236	6.9	1.355	30	13516.8
126	45	4.90795	484.82	243	30.1	0.236	6.9	1.355	34	13516.8
110.5	35	13.8158	549.11	249	9.1	0.179	8	1.41	78	13516.8
108	34	9.3702	878.65	327	8.4	0.2545	8	1.39	348	13516.8
116	34	15.9204	1121.41	372	14	0.232	8	1.41	162	13516.8
107.5	27	15.5292	1388.02	69	20.3	0.243	5.1	1.3	36	13516.8
107.5	26.5	16.2793	1571.89	84	30.1	0.257	7.5	1.24	44	13516.8
100	23.5	21.2915	1347.08	42	17.5	0.309	4.8	1.25	30	13516.8
125.5	44.5	5.40626	449.41	237	34.3	0.236	7.2	1.23	58	13510.2
115.5	37	13.8443	587.07	390	9.1	0.157	8	1.41	190	13510.2
115.5	37	13.8443	587.07	390	9.1	0.157	8	1.41	250	13510.2
114	35.5	15.329	667.49	339	9.1	0.244	8	1.41	276	13510.2
110.5	35.5	14.0945	471.44	249	8.4	0.147	8	1.39	28	13510.2
112.5	32	16.4466	1097.43	300	21	0.244	6.7	1.29	54	13510.2
113	30	17.6567	1214.77	339	14.7	0.2545	6.2	1.355	324	13510.2
104.5	29.5	17.6058	826.59	312	20.3	0.449	5.1	1.3	90	13510.2
104.5	29	18.2227	844.05	237	16.1	0.202	7.8	1.41	116	13510.2
104	23.5	17.8668	1216.85	39	42.7	0.459	4.8	1.27	42	13510.2
115.5	37	13.8443	587.07	390	9.1	0.157	8	1.41	230	13503.6
115.5	37	13.8443	587.07	390	9.1	0.157	8	1.41	236	13503.6
115.5	37	13.8443	587.07	390	9.1	0.157	8	1.41	232	13503.6
115.5	37	13.8443	587.07	390	9.1	0.157	8	1.41	234	13503.6
106	30	18.2604	1002.63	276	20.3	0.267	5.1	1.3	128	13503.6
106	30	18.2604	1002.63	276	20.3	0.267	5.1	1.3	120	13503.6
112	29.5	17.6252	1182.27	321	16.1	0.212	7.8	1.41	310	13503.6
112	29.5	17.6252	1182.27	321	16.1	0.251	7.8	1.41	346	13503.6
112	29.5	17.6252	1182.27	321	16.1	0.212	7.8	1.41	364	13503.6
112	29.5	17.6252	1182.27	321	16.1	0.212	7.8	1.41	354	13503.6
126	45	4.90795	484.82	243	30.1	0.236	6.9	1.355	16	13497
126	45	4.90795	484.82	243	30.1	0.236	6.9	1.355	24	13497
126	45	4.90795	484.82	243	30.1	0.236	6.9	1.355	36	13497
126	45	4.90795	484.82	243	30.1	0.236	6.9	1.355	38	13497
125.5	44.5	5.40626	449.41	237	27.3	0.182	6.4	1.3	42	13497
116.5	35.5	14.4793	606.08	378	9.1	0.205	8	1.41	312	13497
116.5	35.5	14.4793	606.08	378	9.1	0.263	8	1.41	346	13497
113.5	34.5	15.5587	802.91	420	8.4	0.102	8	1.39	328	13497
113.5	34.5	15.5587	802.91	420	8.4	0.102	8	1.39	328	13497
107	28	15.4356	1245.13	135	20.3	0.239	5.1	1.3	32	13497
114	35.5	15.329	667.49	339	9.1	0.244	8	1.41	278	13490.4
114	35.5	15.329	667.49	339	9.1	0.244	8	1.41	346	13490.4
104.5	29.5	17.6058	826.59	312	20.3	0.449	5.1	1.3	86	13490.4
108	27.5	15.4513	1226.21	105	20.3	0.2	5.1	1.3	42	13490.4
104.5	24.5	17.887	1067.57	81	42.7	0.319	4.8	1.27	18	13490.4
104.5	24.5	17.887	1067.57	81	42.7	0.319	4.8	1.27	18	13490.4
126	45	4.90795	484.82	243	30.1	0.236	6.9	1.355	26	13483.8
126	45	4.90795	484.82	243	30.1	0.236	6.9	1.355	26	13483.8
125.5	45	5.03963	432.19	237	27.3	0.182	6.4	1.3	38	13483.8
115.5	37	13.8443	587.07	390	9.1	0.157	8	1.41	286	13483.8
116	34	15.9204	1121.41	372	14	0.249	8	1.41	252	13483.8
116	34	15.9204	1121.41	372	14	0.249	8	1.41	340	13483.8
116	34	15.9204	1121.41	372	14	0.249	8	1.41	366	13483.8
116	34	15.9204	1121.41	372	14	0.249	8	1.41	360	13483.8
106	30	18.2604	1002.63	276	20.3	0.267	5.1	1.3	128	13483.8
113	30	17.6567	1214.77	339	14.7	0.198	6.2	1.355	330	13483.8
116	28.5	18.4732	1527.07	300	16.1	0.238	7.8	1.41	298	13483.8
112.5	28	15.3826	1716.19	219	17.5	0.236	4.8	1.25	324	13483.8
103	23	20.6213	1689.94	45	19.6	0.466	6.6	1.34	30	13483.8
114	35.5	15.329	667.49	339	9.1	0.244	8	1.41	326	13477.2
114	35.5	15.329	667.49	339	9.1	0.244	8	1.41	308	13477.2
114	35.5	15.329	667.49	339	9.1	0.244	8	1.41	302	13477.2
113.5	34.5	15.5587	802.91	420	8.4	0.102	8	1.39	334	13477.2
126	45	4.90795	484.82	243	30.1	0.236	6.9	1.355	34	13470.6
126	45	4.90795	484.82	243	30.1	0.236	6.9	1.355	38	13470.6
115	36.5	14.0428	578.09	402	9.1	0.153	8	1.41	270	13470.6
104.5	29.5	17.6058	826.59	312	20.3	0.449	5.1	1.3	88	13470.6
104.5	29.5	17.6058	826.59	312	20.3	0.449	5.1	1.3	96	13470.6
104.5	29.5	17.6058	826.59	312	20.3	0.449	5.1	1.3	108	13470.6
112.5	34.5	14.7132	793.7	288	8.4	0.179	6.5	1.44	304	13464
116	34	15.9204	1121.41	372	14	0.249	8	1.41	334	13464
116	34	15.9204	1121.41	372	14	0.249	8	1.41	324	13464
110.5	27	16.9191	1391.25	159	14	0.219	4.9	1.43	182	13464
116.5	35.5	14.4793	606.08	378	5.6	0.205	8.2	1.48	318	13457.4
104	30	15.0266	852.12	333	10.5	0.129	8	1.37	116	13457.4
104	30	15.0266	852.12	333	10.5	0.129	8	1.37	110	13457.4
104.5	29.5	17.6058	826.59	312	20.3	0.449	5.1	1.3	106	13457.4
115.5	38	13.8781	508.86	381	8.4	0.153	6.5	1.44	318	13450.8
115	36.5	14.0428	578.09	402	9.1	0.153	8	1.41	280	13450.8
115	36.5	14.0428	578.09	402	9.1	0.157	8	1.41	258	13450.8
115	36.5	14.0428	578.09	402	9.1	0.153	8	1.41	304	13450.8
115	36.5	14.0428	578.09	402	9.1	0.153	8	1.41	306	13450.8
108	34.5	14.6032	603.19	243	14	0.142	6.4	1.41	34	13450.8
112.5	28	15.3826	1716.19	219	17.5	0.205	4.8	1.25	330	13450.8
112.5	28	15.3826	1716.19	219	17.5	0.205	4.8	1.25	332	13450.8
116	28	18.7768	1632.22	300	16.1	0.238	7.8	1.41	238	13450.8
116	28	18.7768	1632.22	300	16.1	0.233	7.8	1.41	282	13450.8
107.5	27	15.5292	1388.02	69	20.3	0.243	5.1	1.3	30	13450.8
101	25	18.1525	999.25	36	20.3	0.205	5.1	1.3	54	13450.8
122	42	8.84264	280	231	27.3	0.234	6.4	1.3	20	13444.2
115.5	38	13.8781	508.86	381	8.4	0.153	6.5	1.44	334	13444.2
115.5	38	13.8781	508.86	381	8.4	0.153	6.5	1.44	324	13444.2
115.5	38	13.8781	508.86	381	8.4	0.153	6.5	1.44	306	13444.2
114.5	38	14.5147	576.88	411	9.1	0.147	8	1.41	302	13444.2
114.5	38	14.5147	576.88	411	9.1	0.147	8	1.41	304	13444.2
116	34	15.9204	1121.41	372	14	0.249	8	1.41	252	13444.2
116	34	15.9204	1121.41	372	14	0.232	8	1.41	336	13444.2
106.5	27.5	15.5309	1265.94	132	30.1	0.257	7.5	1.24	34	13444.2
104.5	24.5	17.887	1067.57	81	42.7	0.319	4.8	1.27	10	13444.2
115	36.5	14.0428	578.09	402	9.1	0.153	8	1.41	310	13437.6
114.5	35.5	15.0289	629.26	384	5.6	0.152	7.9	1.36	148	13437.6
116.5	33.5	16.1242	1099.49	366	14.7	0.249	6.9	1.56	82	13437.6
104.5	29	18.2227	844.05	237	16.1	0.202	7.8	1.41	112	13437.6
104.5	29	18.2227	844.05	237	16.1	0.202	7.8	1.41	112	13437.6
104.5	29	18.2227	844.05	237	16.1	0.202	7.8	1.41	106	13437.6
104.5	29	18.2227	844.05	237	16.1	0.202	7.8	1.41	120	13437.6
101	25.5	16.4221	981.5	33	20.3	0.211	5.1	1.3	44	13437.6
114	35.5	15.329	667.49	339	5.6	0.259	8.2	1.48	344	13431
114.5	33	15.9995	1295.27	468	14	0.112	6.3	1.28	192	13431
104	29	16.1391	823.89	186	20.3	0.17	5.1	1.3	86	13431
116	28	18.7768	1632.22	300	16.1	0.233	7.8	1.41	262	13431
103	23	20.6213	1689.94	45	19.6	0.466	6.6	1.34	28	13431
104.5	29	18.2227	844.05	237	16.1	0.202	7.8	1.41	126	13424.4
104.5	29	18.2227	844.05	237	16.1	0.202	7.8	1.41	120	13424.4
104.5	29	18.2227	844.05	237	16.1	0.202	7.8	1.41	100	13424.4
104.5	29	18.2227	844.05	237	16.1	0.202	7.8	1.41	114	13424.4
118	28.5	17.6177	1770.26	141	33.6	0.092	5.9	1.4	138	13424.4
112.5	34.5	14.7132	793.7	288	5.6	0.205	8.2	1.48	332	13417.8
119	26.5	19.3663	1635.73	90	25.2	0.227	5	1.31	102	13417.8
113	30	17.6567	1214.77	339	16.1	0.198	7.8	1.41	206	13411.2
116.5	29.5	17.7188	1516.7	84	42.7	0.264	4.8	1.27	170	13411.2
106.5	27.5	15.5309	1265.94	132	30.1	0.257	7.5	1.24	52	13411.2
116	28	18.7768	1632.22	300	16.1	0.233	7.8	1.41	254	13411.2
99	25	18.2679	1246	66	14	0.281	4.9	1.43	22	13411.2
107.5	23.5	21.8545	1052.07	60	42.7	0.137	4.8	1.27	24	13411.2
115	37	14.2564	646.56	411	8.4	0.157	8	1.39	284	13404.6
104.5	29	18.2227	844.05	237	16.1	0.202	7.8	1.41	120	13404.6
104.5	29	18.2227	844.05	237	16.1	0.202	7.8	1.41	106	13404.6
115.5	36.5	13.685	525.64	390	8.4	0.187	8	1.39	296	13398
114.5	36.5	14.519	701.75	405	14	0.27	8	1.41	358	13398
112.5	34.5	14.7132	793.7	288	5.6	0.205	8.2	1.48	344	13398
112.5	34.5	14.7132	793.7	288	5.6	0.205	8.2	1.48	342	13398
112.5	34.5	14.7132	793.7	288	5.6	0.205	8.2	1.48	338	13398
113	30	17.6567	1214.77	339	16.1	0.251	7.8	1.41	286	13398
109	27	16.3848	1332.71	81	25.2	0.266	5	1.31	26	13398
109	27	16.3848	1332.71	81	25.2	0.266	5	1.31	24	13398
99.5	24.5	19.7602	1353.76	60	20.3	0.304	5.1	1.3	12	13398
104	23.5	17.8668	1216.85	39	42.7	0.44	4.8	1.27	24	13398
108.5	34.5	14.7994	590.65	282	9.1	0.211	8	1.41	282	13391.4
104	30	15.0266	852.12	333	10.5	0.129	8	1.37	128	13391.4
116	28	18.7768	1632.22	300	14	0.169	4.8	1.29	318	13391.4
125.5	45	5.03963	432.19	237	27.3	0.182	6.4	1.3	50	13384.8
115.5	33.5	15.8205	1280.82	399	8.4	0.249	8	1.39	324	13384.8
115.5	33.5	15.8205	1280.82	399	8.4	0.249	8	1.39	264	13384.8
104.5	29	18.2227	844.05	237	16.1	0.202	7.8	1.41	106	13384.8
126	46.5	4.13022	396.34	258	27.3	0.233	6.4	1.3	54	13378.2
126	46.5	4.13022	396.34	258	27.3	0.233	6.4	1.3	52	13378.2
115.5	36.5	13.685	525.64	390	8.4	0.187	8	1.39	262	13378.2
115.5	36.5	13.685	525.64	390	8.4	0.187	8	1.39	266	13378.2
115.5	36.5	13.685	525.64	390	8.4	0.187	8	1.39	270	13378.2
112.5	34.5	14.7132	793.7	288	5.6	0.205	8.2	1.48	332	13378.2
112.5	34.5	14.7132	793.7	288	5.6	0.223	8.2	1.48	350	13378.2
112.5	32	16.4466	1097.43	300	21	0.202	6.7	1.29	30	13378.2
113	30	17.6567	1214.77	339	16.1	0.251	7.8	1.41	264	13378.2
112	27.5	14.8092	1680.67	213	17.5	0.309	4.8	1.25	172	13378.2
114.5	35.5	15.0289	629.26	372	8.4	0.187	8	1.39	310	13371.6
108.5	34.5	14.7994	590.65	282	9.1	0.211	8	1.41	216	13371.6
112	28.5	16.5522	1485.87	255	16.1	0.236	7.8	1.41	278	13371.6
117.5	40	13.1339	420.31	291	16.1	0.184	6.3	1.39	206	13365
115	36.5	14.0428	578.09	402	14	0.097	8	1.41	316	13365
108.5	34.5	14.7994	590.65	282	8.4	0.217	8	1.39	356	13365
108	34	9.3702	878.65	327	16.1	0.147	7.8	1.41	294	13365
114.5	33	15.9995	1295.27	468	14	0.112	6.3	1.28	198	13365
114.5	33	15.9995	1295.27	468	14	0.112	6.3	1.28	190	13365
104.5	30	16.8197	840.9	312	20.3	0.449	5.1	1.3	88	13365
113	30	17.6567	1214.77	339	16.1	0.198	7.8	1.41	276	13365
103.5	23.5	17.2897	1217.2	45	17.5	0.434	4.8	1.25	34	13358.4
102.5	23	20.2953	1553.96	36	16.1	0.129	7.8	1.41	22	13358.4
80	41	11.9121	53.12	24	41.3	0.106	6.3	1.27	100	13351.8
126	46.5	4.13022	396.34	258	27.3	0.233	6.4	1.3	56	13351.8
125.5	44.5	5.40626	449.41	237	27.3	0.182	6.4	1.3	64	13351.8
115	37	14.2564	646.56	411	8.4	0.157	8	1.39	188	13351.8
115	37	14.2564	646.56	411	8.4	0.187	8	1.39	160	13351.8
115.5	36.5	13.685	525.64	390	8.4	0.159	8	1.39	314	13351.8
113	30	17.6567	1214.77	339	16.1	0.198	7.8	1.41	300	13351.8
113	30	17.6567	1214.77	339	16.1	0.2545	7.8	1.41	280	13351.8
99.5	23.5	19.678	1540.49	48	17.5	0.321	4.8	1.33	30	13351.8
102	23.5	20.2637	1211.58	30	16.1	0.303	7.8	1.41	44	13351.8
126	46.5	4.13022	396.34	258	27.3	0.233	6.4	1.3	54	13345.2
115	37	14.2564	646.56	402	9.1	0.157	8	1.41	190	13345.2
114.5	24.5	21.9899	1794.42	57	33.6	0.168	5.9	1.4	18	13345.2
102.5	23	20.2953	1553.96	33	10.5	0.142	6.5	1.43	12	13345.2
125.5	44.5	5.40626	449.41	237	27.3	0.182	6.4	1.3	78	13338.6
125.5	44.5	5.40626	449.41	237	27.3	0.182	6.4	1.3	74	13338.6
125.5	44.5	5.40626	449.41	237	27.3	0.182	6.4	1.3	78	13338.6
125.5	44.5	5.40626	449.41	237	27.3	0.182	6.4	1.3	80	13338.6
113	40	8.18613	350.27	87	41.3	0.075	6.3	1.27	10	13338.6
116	36	13.7287	545.65	372	9.1	0.147	8	1.41	106	13338.6
114.5	35	15.4769	694.38	366	8.4	0.187	7	1.4	300	13338.6
114.5	33	15.9995	1295.27	468	14	0.112	6.3	1.28	226	13338.6
104.5	30	16.8197	840.9	312	20.3	0.449	5.1	1.3	86	13338.6
113	30	17.6567	1214.77	339	16.1	0.2545	7.8	1.41	294	13338.6
113	30	17.6567	1214.77	339	16.1	0.2545	7.8	1.41	298	13338.6
126	46.5	4.13022	396.34	258	41.3	0.27	6.3	1.27	16	13332
126	46.5	4.13022	396.34	258	41.3	0.27	6.3	1.27	12	13332
125.5	45	5.03963	432.19	237	27.3	0.124	6.4	1.3	40	13332
108.5	35	12.9286	568.72	282	9.1	0.167	8	1.41	140	13332
108.5	35	12.9286	568.72	282	9.1	0.142	8	1.41	182	13332
112.5	34.5	14.7132	793.7	288	5.6	0.205	8.2	1.48	166	13332
112.5	34.5	14.7132	793.7	288	5.6	0.205	8.2	1.48	190	13332
112.5	34.5	14.7132	793.7	288	5.6	0.205	8.2	1.48	332	13332
116	34	15.9204	1121.41	405	5.6	0.232	8.3	1.4	210	13332
116	34	15.9204	1121.41	405	5.6	0.232	8.3	1.4	186	13332
[truncated: 41,448 more rows]
